# Supplementary material for: Comparison of PCR versus PCR-Free DNA Library Preparation for Characterising the Human Faecal Virome
Source: MDPI journal article supplement (doi:10.3390/v13102093), 2021-10-18
Supplement: s1 [file s1]

**Table S2.** *Evaluation of VLP enrichment using ViromeQC*

| Sample     | Raw reads  | Reads_HQ   | SSU rRNA<br>alignment<br>rate | LSU rRNA<br>alignment<br>rate | Bacterial<br>markers<br>alignment<br>rate | Total<br>enrichment<br>score |
|------------|------------|------------|-------------------------------|-------------------------------|-------------------------------------------|------------------------------|
| PCR-free-1 | 37,294,186 | 37,140,565 | 0.033                         | 0.884                         | 0.088                                     | 0.600                        |
| PCR-free-2 | 33,081,118 | 32,889,577 | 0.136                         | 0.454                         | 0.257                                     | 1.168                        |
| PCR-free-3 | 41,795,584 | 41,435,311 | 0.098                         | 0.695                         | 0.164                                     | 0.763                        |
| PCR-1      | 35,237,262 | 34,998,689 | 0.022                         | 0.041                         | 0.063                                     | 11.041                       |
| PCR-2      | 41,430,402 | 41,300,288 | 0.059                         | 0.108                         | 0.166                                     | 4.162                        |
| PCR-3      | 49,280,544 | 49,006,610 | 0.048                         | 0.088                         | 0.096                                     | 5.131                        |

HQ: high-quality; SSU-rRNA: small subunit rRNA gene; LSU-rRNA: large subunit rRNA gene
