# Supplementary material for: Comparison of PCR versus PCR-Free DNA Library Preparation for Characterising the Human Faecal Virome
Source: MDPI journal article supplement (doi:10.3390/v13102093), 2021-10-18
Supplement: s1 [file s1]

**Table S3.** *Putative UViGs detected by VirSorter and VirFinder*

| <b>Dataset</b> | <b># Total<br/>assembled<br/>contigs</b> | <b># VirSorter-<br/>positive</b> | <b>% VirSorter-<br/>positive*</b> | <b># VirFinder-<br/>positive</b> | <b>% VirFinder-<br/>positive*</b> |
|----------------|------------------------------------------|----------------------------------|-----------------------------------|----------------------------------|-----------------------------------|
| PCR-1          | 73,246                                   | 244                              | 0.33                              | 8,609                            | 11.75                             |
| PCR-<br>free-1 | 100,493                                  | 297                              | 0.30                              | 12,392                           | 12.33                             |
| PCR-2          | 103,220                                  | 269                              | 0.26                              | 15,228                           | 14.75                             |
| PCR-<br>free-2 | 131,354                                  | 221                              | 0.17                              | 16,494                           | 12.56                             |
| PCR-3          | 32,063                                   | 188                              | 0.59                              | 3,995                            | 12.46                             |
| PCR-<br>free-3 | 48,194                                   | 176                              | 0.37                              | 5,532                            | 11.48                             |

\*As determined by dividing the number of each assembly into the number of VirSorter- or VirFinder-positive then multiplying by 100 %
