# Supplementary material for: Comparison of PCR versus PCR-Free DNA Library Preparation for Characterising the Human Faecal Virome
Source: MDPI journal article supplement (doi:10.3390/v13102093), 2021-10-18
Supplement: s1 [file s1]

**Table S6.** *Statistics of mapped and unmapped reads from PCR and PCR-free library datasets to vOTUs*

|                                   | PCR-1      | PCR-free-1 | PCR-2      | PCR-free-2 | PCR-3      | PCR-free-3 |
|-----------------------------------|------------|------------|------------|------------|------------|------------|
| # of cleaned reads (paired-ended) | 33,872,924 | 36,122,668 | 40,749,416 | 32,048,918 | 47,904,786 | 40,102,922 |
| # of reads mapped to vOTUs        | 30,533,123 | 31,754,308 | 32,885,103 | 23,357,458 | 42,241,639 | 33,515,173 |
| Mapping rate to vOTUs (%)         | 90.1 %     | 87.9 %     | 80.7 %     | 72.9 %     | 88.2 %     | 83.6 %     |
| # of unmapped reads               | 3,339,801  | 4,368,360  | 7,864,313  | 8,691,460  | 5,663,147  | 6,587,749  |
| Unmapping rate (%)                | 9.9 %      | 12.1 %     | 19.3 %     | 27.1 %     | 11.8 %     | 16.4 %     |
