# Supplementary material for: Comparison of PCR versus PCR-Free DNA Library Preparation for Characterising the Human Faecal Virome
Source: MDPI journal article supplement (doi:10.3390/v13102093), 2021-10-18
Supplement: s1 [file s1]

**Table S4.** *Quantity of non-redundant vOTUs > 1 kbp*

|                      | <b>PCR-1</b> | <b>PCR-free-1</b> | <b>PCR-2</b> | <b>PCR-free-2</b> | <b>PCR-3</b> | <b>PCR-free-3</b> |
|----------------------|--------------|-------------------|--------------|-------------------|--------------|-------------------|
| # vOTUs<br>(> 1 kbp) | 6,749        | 7,760             | 7,354        | 7,581             | 3,795        | 4,250             |
