# Supplementary material for: Comparison of PCR versus PCR-Free DNA Library Preparation for Characterising the Human Faecal Virome
Source: MDPI journal article supplement (doi:10.3390/v13102093), 2021-10-18
Supplement: s1 [file s1]

**Table S1.** *Recovery of (spiked) phage and VLP DNA from processed human faeces after dual filtration*

| Donor # | Sample type | Sample weight (g) | Faecal aliquots # | PFU recovery (%) <sup>*</sup> | % Overall recovery (mean $\pm$ SD, n = 3) | DNA (ng/ $\mu$ l) | Total DNA ( $\mu$ g) | OD <sub>260/280</sub> | DNA yield ( $\mu$ g/g faeces) |
|---------|-------------|-------------------|-------------------|-------------------------------|-------------------------------------------|-------------------|----------------------|-----------------------|-------------------------------|
| 1       | Fresh       | 47.0              | 12                | 34.5                          |                                           | 53.7              | 4.46                 | 1.8                   | 0.095                         |
| 2       | Fresh       | 37.5              | 10                | 32.6                          | 35.8 $\pm$ 3.96                           | 35.0              | 2.52                 | 1.8                   | 0.067                         |
| 3       | Frozen      | 37.0              | 10                | 40.2                          |                                           | 46.4              | 3.20                 | 1.8                   | 0.086                         |

<sup>\*</sup>As determined by dividing PFU of pure phage stock ( $\phi$ B124-14) into PFU after PEG precipitation then multiplying by 100 %. All PFU recovery was replicated three times for each sample.
