# Supplementary material for: Comparison of PCR versus PCR-Free DNA Library Preparation for Characterising the Human Faecal Virome
Source: MDPI journal article supplement (doi:10.3390/v13102093), 2021-10-18
Supplement: s1 [file s1]

**Figure S1:** Transmission electron micrographs of VLPs after dual 0.8- and 0.45- $\mu\text{m}$  filtration.

Red arrows indicate intact virions and virus-like structures. (A) siphovirus (capsid:  $\sim 85.7$  nm in diameter; tail:  $\sim 285.7$  nm in length), (B) siphovirus (capsid:  $\sim 166.7$  nm in diameter; tail:  $\sim 566.7$  nm in length), (C) siphovirus (capsid:  $\sim 80$  nm in diameter; tail:  $\sim 180$  nm in length), (D) myovirus associated with membranous material (capsid:  $\sim 100$  nm in diameter; tail:  $\sim 100$  nm in length), (E) myovirus (capsid:  $\sim 100$  nm in diameter; tail:  $\sim 200$  nm in length). Scale bar: 100-200 nm.

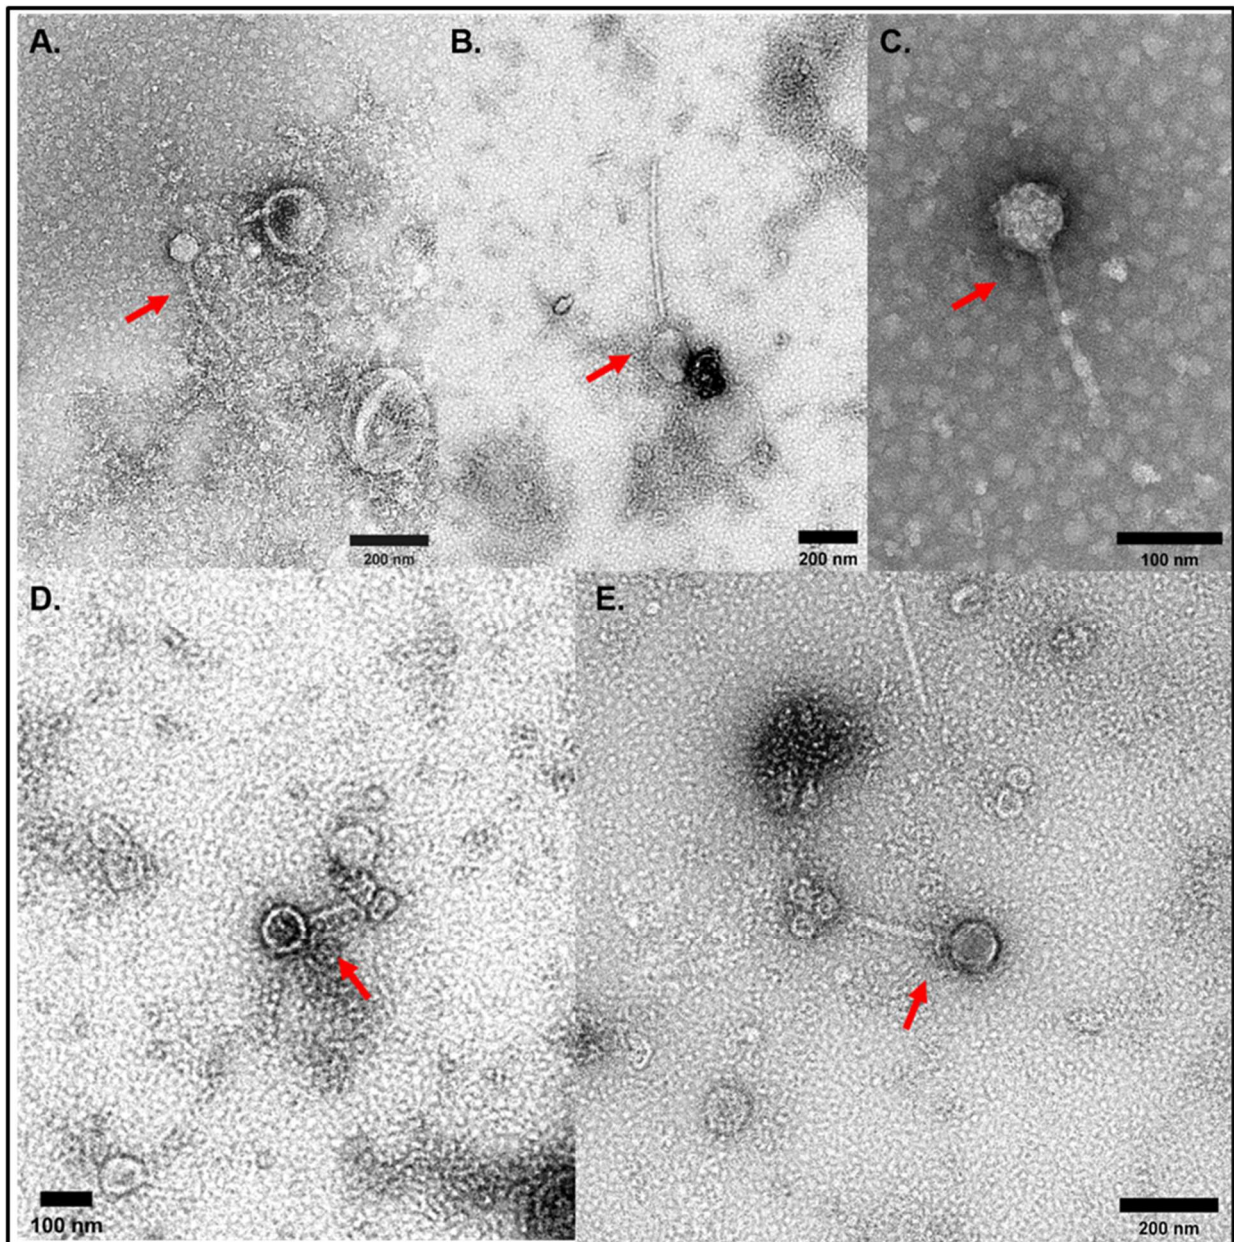

**Figure S1:** Transmission electron micrographs of VLPs after dual 0.8- and 0.45- $\mu\text{m}$  filtration.

Red arrows indicate intact virions and virus-like structures. (A) siphovirus (capsid:  $\sim 85.7$  nm in diameter; tail:  $\sim 285.7$  nm in length), (B) siphovirus (capsid:  $\sim 166.7$  nm in diameter; tail:  $\sim 566.7$  nm in length)

length), (C) siphovirus (capsid: ~80 nm in diameter; tail: ~180 nm in length), (D) myovirus associated with membranous material (capsid: ~100 nm in diameter; tail: ~100 nm in length), (E) myovirus (capsid: ~100 nm in diameter; tail: ~200 nm in length). Scale bar: 100-200 nm.
