# Supplementary material for: Comparison of PCR versus PCR-Free DNA Library Preparation for Characterising the Human Faecal Virome
Source: Viruses. 2021 Oct 18;13(10):2093. doi: 10.3390/v13102093 (PMC8537689; doi:10.3390/v13102093)
Supplement: Supplementary file 1 [file viruses-13-02093-s001.zip]

Archive with 9 entries (9 files):
- supplementary material/FS1.pdf
- supplementary material/MS1.pdf
- supplementary material/Table S5.xlsx
- supplementary material/TableS7.xlsx
- supplementary material/TS1.pdf
- supplementary material/TS2.pdf
- supplementary material/TS3.pdf
- supplementary material/TS4.pdf
- supplementary material/TS6.pdf
