# Supplementary material for: Comparison of PCR versus PCR-Free DNA Library Preparation for Characterising the Human Faecal Virome
Source: Viruses. 2021 Oct 18;13(10):2093. doi: 10.3390/v13102093 (PMC8537689; doi:10.3390/v13102093)
Supplement: Supplementary file 1 [file viruses-13-02093-s001.zip › supplementary material/Table S5.xlsx]

## Sheet: quality_summary
contig_id	contig_length	provirus	proviral_length	gene_count	viral_genes	host_genes	checkv_quality	miuvig_quality	completeness	completeness_method	contamination	kmer_freq	warnings
s18v1_56	1181	No	NA	1	0	0	Not-determined	Genome-fragment	NA	NA	0	1	no viral genes detected
s18v1_92	1485	No	NA	2	0	1	Not-determined	Genome-fragment	NA	NA	0	1	no viral genes detected
s18v1_133	1459	No	NA	2	0	0	Low-quality	Genome-fragment	0.36	AAI-based (high-confidence)	0	1.1	no viral genes detected
s18v1_173	1326	No	NA	2	0	0	Not-determined	Genome-fragment	NA	NA	0	1	no viral genes detected
s18v1_296	1548	No	NA	3	0	3	Not-determined	Genome-fragment	NA	NA	0	1	no viral genes detected
s18v1_397	1515	No	NA	3	0	2	Not-determined	Genome-fragment	NA	NA	0	1	no viral genes detected
s18v1_593	1155	No	NA	2	0	0	Not-determined	Genome-fragment	NA	NA	0	1	no viral genes detected
s18v1_661	10625	No	NA	17	6	1	Low-quality	Genome-fragment	28.26	AAI-based (high-confidence)	0	1
s18v1_810	4783	No	NA	3	0	2	Not-determined	Genome-fragment	NA	NA	0	1	no viral genes detected
s18v1_863	1015	No	NA	2	0	0	Not-determined	Genome-fragment	NA	NA	0	1	no viral genes detected
s18v1_890	1798	No	NA	2	0	2	Not-determined	Genome-fragment	NA	NA	0	1	no viral genes detected
s18v1_920	6689	No	NA	13	0	1	Not-determined	Genome-fragment	NA	NA	0	1	no viral genes detected
s18v1_1023	1014	No	NA	2	0	0	Not-determined	Genome-fragment	NA	NA	0	1	no viral genes detected
s18v1_1038	1048	No	NA	2	0	1	Not-determined	Genome-fragment	NA	NA	0	1	no viral genes detected
s18v1_1186	1006	No	NA	2	0	0	Not-determined	Genome-fragment	NA	NA	0	1	no viral genes detected
s18v1_1194	1059	No	NA	4	0	0	Low-quality	Genome-fragment	2.54	AAI-based (high-confidence)	0	1	no viral genes detected
s18v1_1229	1159	No	NA	2	0	2	Not-determined	Genome-fragment	NA	NA	0	1.1	no viral genes detected
s18v1_1240	1504	No	NA	2	0	2	Not-determined	Genome-fragment	NA	NA	0	1	no viral genes detected
s18v1_1368	1060	No	NA	2	0	1	Not-determined	Genome-fragment	NA	NA	0	1	no viral genes detected
s18v1_1410	1010	No	NA	3	0	0	Low-quality	Genome-fragment	1.8	AAI-based (medium-confidence)	0	1	no viral genes detected
s18v1_1465	1193	No	NA	1	0	0	Not-determined	Genome-fragment	NA	NA	0	1	no viral genes detected
s18v1_1469	1214	No	NA	2	0	2	Not-determined	Genome-fragment	NA	NA	0	1	no viral genes detected
s18v1_1510	1432	No	NA	2	1	0	Low-quality	Genome-fragment	0.72	HMM-based (lower-bound)	0	1
s18v1_1573	4086	No	NA	4	0	4	Not-determined	Genome-fragment	NA	NA	0	1	no viral genes detected
s18v1_1667	1046	No	NA	2	0	0	Not-determined	Genome-fragment	NA	NA	0	1.15	no viral genes detected
s18v1_1806	4257	No	NA	4	0	1	Not-determined	Genome-fragment	NA	NA	0	1	no viral genes detected
s18v1_2027	1025	No	NA	2	2	0	Low-quality	Genome-fragment	2.35	AAI-based (medium-confidence)	0	1
s18v1_2053	1136	No	NA	3	1	0	Low-quality	Genome-fragment	1.71	AAI-based (high-confidence)	0	1
s18v1_2132	3686	Yes	1729	3	1	1	Low-quality	Genome-fragment	4.13	AAI-based (medium-confidence)	53.09	1
s18v1_2135	1608	No	NA	1	0	0	Not-determined	Genome-fragment	NA	NA	0	1	no viral genes detected
s18v1_2278	1177	No	NA	1	0	1	Not-determined	Genome-fragment	NA	NA	0	1	no viral genes detected
s18v1_2296	3660	No	NA	16	0	0	Not-determined	Genome-fragment	NA	NA	0	1	no viral genes detected
s18v1_2407	1561	No	NA	3	0	0	Not-determined	Genome-fragment	NA	NA	0	1	no viral genes detected
s18v1_2570	1370	No	NA	1	0	0	Not-determined	Genome-fragment	NA	NA	0	1	no viral genes detected
s18v1_2598	1517	No	NA	2	0	2	Not-determined	Genome-fragment	NA	NA	0	1	no viral genes detected
s18v1_2684	1996	No	NA	2	0	0	Low-quality	Genome-fragment	3.95	AAI-based (high-confidence)	0	1	no viral genes detected
s18v1_2831	1576	No	NA	1	0	0	Not-determined	Genome-fragment	NA	NA	0	1	no viral genes detected
s18v1_2886	2682	No	NA	1	0	1	Not-determined	Genome-fragment	NA	NA	0	1	no viral genes detected
s18v1_2934	2144	No	NA	1	0	0	Low-quality	Genome-fragment	1.38	AAI-based (high-confidence)	0	1	no viral genes detected
s18v1_3001	2916	No	NA	3	0	1	Low-quality	Genome-fragment	1.89	AAI-based (medium-confidence)	0	1	no viral genes detected
s18v1_3022	48403	No	NA	69	6	3	High-quality	High-quality	91.02	AAI-based (high-confidence)	0	1
s18v1_3114	1086	No	NA	2	0	0	Not-determined	Genome-fragment	NA	NA	0	1	no viral genes detected
s18v1_3230	1565	No	NA	4	2	0	Low-quality	Genome-fragment	3.39	AAI-based (medium-confidence)	0	1
s18v1_3379	1064	No	NA	3	0	0	Not-determined	Genome-fragment	NA	NA	0	1	no viral genes detected
s18v1_3381	1104	No	NA	1	0	1	Not-determined	Genome-fragment	NA	NA	0	1	no viral genes detected
s18v1_3439	1152	No	NA	3	0	1	Not-determined	Genome-fragment	NA	NA	0	1	no viral genes detected
s18v1_3619	1465	No	NA	3	0	0	Low-quality	Genome-fragment	3.86	AAI-based (high-confidence)	0	1	no viral genes detected
s18v1_3635	1100	No	NA	1	0	1	Not-determined	Genome-fragment	NA	NA	0	1	no viral genes detected
s18v1_3799	1404	No	NA	2	0	0	Low-quality	Genome-fragment	3.28	AAI-based (high-confidence)	0	1	no viral genes detected; low-confidence ITR
s18v1_3834	3350	No	NA	2	0	1	Not-determined	Genome-fragment	NA	NA	0	1	no viral genes detected
s18v1_3894	1061	No	NA	1	0	0	Not-determined	Genome-fragment	NA	NA	0	1	no viral genes detected
s18v1_3927	1156	No	NA	4	0	0	Low-quality	Genome-fragment	1.8	AAI-based (high-confidence)	0	1	no viral genes detected
s18v1_4072	1465	No	NA	1	0	0	Not-determined	Genome-fragment	NA	NA	0	1	no viral genes detected
s18v1_4155	1192	No	NA	1	0	0	Not-determined	Genome-fragment	NA	NA	0	1	no viral genes detected
s18v1_4261	1253	No	NA	1	0	0	Not-determined	Genome-fragment	NA	NA	0	1	no viral genes detected
s18v1_4297	1017	No	NA	1	0	1	Not-determined	Genome-fragment	NA	NA	0	1	no viral genes detected
s18v1_4316	1568	No	NA	3	0	1	Not-determined	Genome-fragment	NA	NA	0	1	no viral genes detected
s18v1_4525	3583	No	NA	6	0	1	Low-quality	Genome-fragment	4.55	AAI-based (high-confidence)	0	1	no viral genes detected
s18v1_4568	1814	No	NA	2	0	1	Not-determined	Genome-fragment	NA	NA	0	1	no viral genes detected
s18v1_4569	1018	No	NA	2	0	1	Not-determined	Genome-fragment	NA	NA	0	1	no viral genes detected
s18v1_4730	1157	No	NA	1	0	0	Not-determined	Genome-fragment	NA	NA	0	1	no viral genes detected
s18v1_5012	1023	No	NA	4	1	0	Low-quality	Genome-fragment	1.65	AAI-based (high-confidence)	0	1
s18v1_5036	49675	No	NA	78	21	0	High-quality	High-quality	98.44	AAI-based (high-confidence)	0	1
s18v1_5067	1083	No	NA	2	0	1	Low-quality	Genome-fragment	1.35	AAI-based (medium-confidence)	0	1	no viral genes detected
s18v1_5300	6043	No	NA	2	0	1	Not-determined	Genome-fragment	NA	NA	0	1	no viral genes detected
s18v1_5488	1011	No	NA	2	0	2	Not-determined	Genome-fragment	NA	NA	0	1	no viral genes detected
s18v1_5493	1489	No	NA	2	0	0	Not-determined	Genome-fragment	NA	NA	0	1	no viral genes detected
s18v1_5584	1305	No	NA	2	0	0	Low-quality	Genome-fragment	1.6	AAI-based (medium-confidence)	0	1	no viral genes detected
s18v1_5615	6566	No	NA	6	0	1	Not-determined	Genome-fragment	NA	NA	0	1	no viral genes detected
s18v1_5671	1798	No	NA	3	0	1	Not-determined	Genome-fragment	NA	NA	0	1	no viral genes detected
s18v1_5734	1445	No	NA	1	0	0	Not-determined	Genome-fragment	NA	NA	0	1	no viral genes detected
s18v1_5735	1615	No	NA	1	0	0	Not-determined	Genome-fragment	NA	NA	0	1	no viral genes detected
s18v1_5754	1658	No	NA	4	0	0	Low-quality	Genome-fragment	4.53	AAI-based (high-confidence)	0	1	no viral genes detected
s18v1_5764	2157	No	NA	3	0	0	Not-determined	Genome-fragment	NA	NA	0	1	no viral genes detected
s18v1_5823	3996	No	NA	5	0	2	Not-determined	Genome-fragment	NA	NA	0	1	no viral genes detected
s18v1_5898	1176	No	NA	1	0	0	Not-determined	Genome-fragment	NA	NA	0	1	no viral genes detected
s18v1_6002	1094	No	NA	2	0	2	Not-determined	Genome-fragment	NA	NA	0	1	no viral genes detected
s18v1_6042	2176	No	NA	1	0	1	Not-determined	Genome-fragment	NA	NA	0	1	no viral genes detected
s18v1_6051	9580	No	NA	18	0	2	Low-quality	Genome-fragment	20.37	AAI-based (high-confidence)	0	1	no viral genes detected
s18v1_6132	1665	No	NA	1	0	1	Not-determined	Genome-fragment	NA	NA	0	1	no viral genes detected
s18v1_6202	1001	No	NA	1	0	0	Not-determined	Genome-fragment	NA	NA	0	1	no viral genes detected
s18v1_6228	3900	No	NA	3	0	3	Not-determined	Genome-fragment	NA	NA	0	1	no viral genes detected
s18v1_6282	21726	No	NA	25	1	4	Low-quality	Genome-fragment	27.53	AAI-based (medium-confidence)	0	1
s18v1_6301	1230	No	NA	2	0	1	Not-determined	Genome-fragment	NA	NA	0	1	no viral genes detected
s18v1_6329	3807	No	NA	6	0	0	Not-determined	Genome-fragment	NA	NA	0	1	no viral genes detected
s18v1_6496	1279	No	NA	4	0	0	Low-quality	Genome-fragment	0.69	AAI-based (medium-confidence)	0	1	no viral genes detected
s18v1_6554	1467	No	NA	1	0	1	Not-determined	Genome-fragment	NA	NA	0	1	no viral genes detected
s18v1_6575	6441	No	NA	16	0	0	Low-quality	Genome-fragment	12.85	AAI-based (high-confidence)	0	1	no viral genes detected
s18v1_6613	1881	No	NA	2	0	1	Not-determined	Genome-fragment	NA	NA	0	1	no viral genes detected
s18v1_6666	5223	Yes	3997	3	1	1	Low-quality	Genome-fragment	6.49	AAI-based (high-confidence)	23.47	1
s18v1_6694	1060	No	NA	3	0	0	Low-quality	Genome-fragment	2.46	AAI-based (high-confidence)	0	1	no viral genes detected
s18v1_6703	1220	No	NA	1	1	0	Low-quality	Genome-fragment	2.55	AAI-based (high-confidence)	0	1
s18v1_6779	1048	No	NA	3	0	0	Not-determined	Genome-fragment	NA	NA	0	1	no viral genes detected
s18v1_6899	2708	No	NA	1	0	1	Not-determined	Genome-fragment	NA	NA	0	1	no viral genes detected
s18v1_6962	3025	No	NA	3	0	1	Low-quality	Genome-fragment	4.99	AAI-based (medium-confidence)	0	1	no viral genes detected
s18v1_6980	1253	No	NA	2	0	0	Not-determined	Genome-fragment	NA	NA	0	1	no viral genes detected
s18v1_7165	1244	No	NA	1	0	0	Not-determined	Genome-fragment	NA	NA	0	1	no viral genes detected
s18v1_7175	49522	No	NA	80	20	0	Medium-quality	Genome-fragment	85.05	AAI-based (high-confidence)	0	1
s18v1_7325	1149	No	NA	2	0	1	Not-determined	Genome-fragment	NA	NA	0	1	no viral genes detected
s18v1_7447	3084	No	NA	2	0	2	Not-determined	Genome-fragment	NA	NA	0	1	no viral genes detected
s18v1_7483	5209	No	NA	12	0	0	Low-quality	Genome-fragment	1.32	AAI-based (high-confidence)	0	1	no viral genes detected
s18v1_7581	1077	No	NA	1	0	0	Low-quality	Genome-fragment	2.32	AAI-based (high-confidence)	0	1	no viral genes detected
s18v1_7759	1050	No	NA	2	0	2	Not-determined	Genome-fragment	NA	NA	0	1	no viral genes detected
s18v1_7770	1351	No	NA	2	0	0	Not-determined	Genome-fragment	NA	NA	0	1	no viral genes detected
s18v1_7785	1112	No	NA	3	0	2	Not-determined	Genome-fragment	NA	NA	0	1	no viral genes detected
s18v1_7902	1723	No	NA	2	0	0	Low-quality	Genome-fragment	0.57	AAI-based (medium-confidence)	0	1	no viral genes detected
s18v1_8009	1509	No	NA	2	0	2	Not-determined	Genome-fragment	NA	NA	0	1	no viral genes detected
s18v1_8034	1078	No	NA	2	0	0	Low-quality	Genome-fragment	1.4	AAI-based (high-confidence)	0	1	no viral genes detected
s18v1_8083	4172	No	NA	6	2	0	Low-quality	Genome-fragment	10.49	AAI-based (high-confidence)	0	1
s18v1_8153	3576	No	NA	5	0	4	Not-determined	Genome-fragment	NA	NA	0	1	no viral genes detected
s18v1_8180	1253	No	NA	2	0	0	Not-determined	Genome-fragment	NA	NA	0	1	no viral genes detected
s18v1_8375	1663	No	NA	1	0	1	Not-determined	Genome-fragment	NA	NA	0	1	no viral genes detected
s18v1_8382	1083	No	NA	1	0	1	Not-determined	Genome-fragment	NA	NA	0	1	no viral genes detected
s18v1_8535	20639	No	NA	21	1	3	Low-quality	Genome-fragment	30.35	AAI-based (medium-confidence)	0	1
s18v1_8576	4944	No	NA	6	0	4	Not-determined	Genome-fragment	NA	NA	0	1	no viral genes detected
s18v1_8738	45595	No	NA	58	29	0	Complete	High-quality	100	DTR (high-confidence)	0	1
s18v1_8949	3260	No	NA	4	0	3	Not-determined	Genome-fragment	NA	NA	0	1	no viral genes detected
s18v1_9235	1887	No	NA	2	0	0	Not-determined	Genome-fragment	NA	NA	0	1	no viral genes detected
s18v1_9312	4764	No	NA	7	4	0	Low-quality	Genome-fragment	10.04	AAI-based (medium-confidence)	0	1
s18v1_9334	3213	No	NA	3	0	3	Not-determined	Genome-fragment	NA	NA	0	1	no viral genes detected
s18v1_9540	2318	No	NA	2	0	0	Low-quality	Genome-fragment	2.84	AAI-based (high-confidence)	0	1	no viral genes detected
s18v1_9686	36971	No	NA	50	25	0	Medium-quality	Genome-fragment	61.37	AAI-based (medium-confidence)	0	1
s18v1_9722	1197	No	NA	2	0	2	Not-determined	Genome-fragment	NA	NA	0	1	no viral genes detected
s18v1_9840	1511	No	NA	3	1	0	Low-quality	Genome-fragment	3.77	AAI-based (high-confidence)	0	1
s18v1_9861	1412	No	NA	2	0	1	Not-determined	Genome-fragment	NA	NA	0	1	no viral genes detected
s18v1_9902	2269	No	NA	3	0	3	Not-determined	Genome-fragment	NA	NA	0	1	no viral genes detected
s18v1_9974	1035	No	NA	2	0	1	Not-determined	Genome-fragment	NA	NA	0	1	no viral genes detected
s18v1_9985	6329	No	NA	5	0	4	Not-determined	Genome-fragment	NA	NA	0	1	no viral genes detected
s18v1_10077	1373	No	NA	1	0	1	Not-determined	Genome-fragment	NA	NA	0	1	no viral genes detected
s18v1_10189	6506	No	NA	6	2	0	Low-quality	Genome-fragment	14.6	AAI-based (high-confidence)	0	1
s18v1_10202	3699	No	NA	5	0	0	Low-quality	Genome-fragment	3.49	AAI-based (high-confidence)	0	1	no viral genes detected
s18v1_10226	1434	No	NA	3	0	0	Not-determined	Genome-fragment	NA	NA	0	1	no viral genes detected
s18v1_10360	3022	No	NA	2	0	1	Not-determined	Genome-fragment	NA	NA	0	1	no viral genes detected
s18v1_10502	179793	No	NA	220	28	4	High-quality	High-quality	98	AAI-based (high-confidence)	0	1
s18v1_10556	1213	No	NA	2	0	1	Low-quality	Genome-fragment	1.9	AAI-based (high-confidence)	0	1	no viral genes detected
s18v1_10566	1004	No	NA	2	0	0	Low-quality	Genome-fragment	2.14	AAI-based (high-confidence)	0	1	no viral genes detected
s18v1_10670	1140	No	NA	2	0	1	Not-determined	Genome-fragment	NA	NA	0	1	no viral genes detected
s18v1_10857	1217	No	NA	1	0	1	Not-determined	Genome-fragment	NA	NA	0	1	no viral genes detected
s18v1_10905	1352	No	NA	1	0	0	Not-determined	Genome-fragment	NA	NA	0	1	no viral genes detected
s18v1_10914	1172	No	NA	2	0	2	Not-determined	Genome-fragment	NA	NA	0	1	no viral genes detected
s18v1_10951	3282	No	NA	3	0	1	Not-determined	Genome-fragment	NA	NA	0	1	no viral genes detected
s18v1_11164	1035	No	NA	1	0	0	Not-determined	Genome-fragment	NA	NA	0	1	no viral genes detected
s18v1_11199	1250	No	NA	1	0	1	Not-determined	Genome-fragment	NA	NA	0	1	no viral genes detected
s18v1_11202	1464	No	NA	4	0	4	Not-determined	Genome-fragment	NA	NA	0	1	no viral genes detected
s18v1_11210	4215	No	NA	6	0	2	Not-determined	Genome-fragment	NA	NA	0	1	no viral genes detected
s18v1_11274	1242	No	NA	2	0	0	Not-determined	Genome-fragment	NA	NA	0	1	no viral genes detected
s18v1_11350	1080	No	NA	2	0	0	Not-determined	Genome-fragment	NA	NA	0	1	no viral genes detected
s18v1_11446	2393	No	NA	2	0	1	Not-determined	Genome-fragment	NA	NA	0	1	no viral genes detected
s18v1_11456	30170	No	NA	55	1	0	Low-quality	Genome-fragment	14.58	HMM-based (lower-bound)	0	1
s18v1_11489	1090	No	NA	1	0	0	Not-determined	Genome-fragment	NA	NA	0	1	no viral genes detected
s18v1_11529	2261	No	NA	2	0	0	Not-determined	Genome-fragment	NA	NA	0	1	no viral genes detected
s18v1_11531	1227	No	NA	2	0	1	Not-determined	Genome-fragment	NA	NA	0	1	no viral genes detected
s18v1_11560	1854	No	NA	1	0	0	Not-determined	Genome-fragment	NA	NA	0	1	no viral genes detected
s18v1_11647	3236	No	NA	4	0	3	Not-determined	Genome-fragment	NA	NA	0	1	no viral genes detected
s18v1_11835	1683	No	NA	1	0	0	Not-determined	Genome-fragment	NA	NA	0	1	no viral genes detected
s18v1_11840	4394	No	NA	5	0	2	Not-determined	Genome-fragment	NA	NA	0	1	no viral genes detected
s18v1_11889	1591	No	NA	2	0	0	Not-determined	Genome-fragment	NA	NA	0	1	no viral genes detected
s18v1_11981	7907	No	NA	9	1	0	Low-quality	Genome-fragment	17.71	AAI-based (high-confidence)	0	1
s18v1_12039	1087	No	NA	3	0	3	Not-determined	Genome-fragment	NA	NA	0	1	no viral genes detected
s18v1_12117	1342	No	NA	2	0	0	Not-determined	Genome-fragment	NA	NA	0	1	no viral genes detected
s18v1_12126	2296	No	NA	2	0	1	Not-determined	Genome-fragment	NA	NA	0	1	no viral genes detected
s18v1_12133	1207	No	NA	2	0	1	Not-determined	Genome-fragment	NA	NA	0	1	no viral genes detected
s18v1_12205	1120	No	NA	1	0	1	Low-quality	Genome-fragment	0.7	AAI-based (high-confidence)	0	1	no viral genes detected
s18v1_12243	39621	Yes	32688	55	12	7	Medium-quality	Genome-fragment	89.22	AAI-based (high-confidence)	17.5	1
s18v1_12262	7365	No	NA	6	0	3	Not-determined	Genome-fragment	NA	NA	0	1	no viral genes detected
s18v1_12284	3569	No	NA	4	0	0	Low-quality	Genome-fragment	9.23	AAI-based (high-confidence)	0	1	no viral genes detected
s18v1_12597	4559	No	NA	7	0	1	Low-quality	Genome-fragment	10.47	AAI-based (medium-confidence)	0	1	no viral genes detected
s18v1_12633	2278	No	NA	1	0	1	Not-determined	Genome-fragment	NA	NA	0	1	no viral genes detected
s18v1_12641	1900	No	NA	2	0	1	Not-determined	Genome-fragment	NA	NA	0	1	no viral genes detected
s18v1_12758	1669	No	NA	2	0	1	Not-determined	Genome-fragment	NA	NA	0	1	no viral genes detected
s18v1_12815	1022	No	NA	1	0	1	Not-determined	Genome-fragment	NA	NA	0	1	no viral genes detected
s18v1_12834	1322	No	NA	2	0	0	Low-quality	Genome-fragment	0.98	AAI-based (high-confidence)	0	1	no viral genes detected
s18v1_12916	1169	No	NA	1	0	1	Not-determined	Genome-fragment	NA	NA	0	1	no viral genes detected
s18v1_12938	2424	No	NA	6	0	0	Low-quality	Genome-fragment	3.94	AAI-based (high-confidence)	0	1	no viral genes detected
s18v1_13025	37802	No	NA	48	7	2	Medium-quality	Genome-fragment	62.45	AAI-based (high-confidence)	0	1
s18v1_13085	16832	No	NA	28	4	0	Low-quality	Genome-fragment	15.43	AAI-based (high-confidence)	0	1
s18v1_13088	3186	No	NA	3	0	2	Not-determined	Genome-fragment	NA	NA	0	1	no viral genes detected
s18v1_13202	1035	No	NA	3	0	1	Not-determined	Genome-fragment	NA	NA	0	1	no viral genes detected
s18v1_13209	1539	No	NA	1	0	1	Not-determined	Genome-fragment	NA	NA	0	1	no viral genes detected
s18v1_13231	3636	No	NA	1	0	0	Low-quality	Genome-fragment	4.21	AAI-based (high-confidence)	0	1	no viral genes detected
s18v1_13233	2377	No	NA	5	0	4	Not-determined	Genome-fragment	NA	NA	0	1	no viral genes detected
s18v1_13327	1839	No	NA	3	0	1	Not-determined	Genome-fragment	NA	NA	0	1	no viral genes detected
s18v1_13331	4171	No	NA	11	2	0	Low-quality	Genome-fragment	5.18	AAI-based (high-confidence)	0	1
s18v1_13349	6502	No	NA	6	2	0	Low-quality	Genome-fragment	14.6	AAI-based (high-confidence)	0	1
s18v1_13380	4370	No	NA	7	3	0	Low-quality	Genome-fragment	9.6	AAI-based (high-confidence)	0	1
s18v1_13418	3244	No	NA	3	0	2	Not-determined	Genome-fragment	NA	NA	0	1	no viral genes detected
s18v1_13432	1832	No	NA	3	0	0	Low-quality	Genome-fragment	0.55	AAI-based (high-confidence)	0	1	no viral genes detected
s18v1_13454	2632	No	NA	5	4	0	Low-quality	Genome-fragment	3.92	AAI-based (high-confidence)	0	1
s18v1_13464	8431	No	NA	23	3	0	Low-quality	Genome-fragment	18.91	AAI-based (high-confidence)	0	1
s18v1_13799	1056	No	NA	2	0	1	Not-determined	Genome-fragment	NA	NA	0	1	no viral genes detected
s18v1_14043	1564	No	NA	2	0	0	Not-determined	Genome-fragment	NA	NA	0	1	no viral genes detected
s18v1_14102	1303	No	NA	1	0	1	Not-determined	Genome-fragment	NA	NA	0	1	no viral genes detected
s18v1_14124	1792	No	NA	2	0	2	Not-determined	Genome-fragment	NA	NA	0	1	no viral genes detected
s18v1_14300	1085	No	NA	2	0	1	Not-determined	Genome-fragment	NA	NA	0	1	no viral genes detected
s18v1_14333	1049	No	NA	1	1	0	Low-quality	Genome-fragment	2.41	AAI-based (medium-confidence)	0	1
s18v1_14506	1008	No	NA	1	0	1	Not-determined	Genome-fragment	NA	NA	0	1	no viral genes detected
s18v1_14590	1045	No	NA	1	0	0	Not-determined	Genome-fragment	NA	NA	0	1	no viral genes detected
s18v1_14624	1135	No	NA	1	0	0	Not-determined	Genome-fragment	NA	NA	0	1	no viral genes detected
s18v1_14721	4230	No	NA	2	0	1	Not-determined	Genome-fragment	NA	NA	0	1	no viral genes detected
s18v1_14736	1097	No	NA	2	0	1	Not-determined	Genome-fragment	NA	NA	0	1	no viral genes detected
s18v1_14784	1750	No	NA	2	0	0	Low-quality	Genome-fragment	4.13	AAI-based (high-confidence)	0	1	no viral genes detected
s18v1_14830	1315	No	NA	3	0	1	Not-determined	Genome-fragment	NA	NA	0	1	no viral genes detected
s18v1_14876	1581	No	NA	1	0	1	Low-quality	Genome-fragment	0.48	AAI-based (medium-confidence)	0	1	no viral genes detected
s18v1_14923	1185	No	NA	1	0	0	Not-determined	Genome-fragment	NA	NA	0	1	no viral genes detected
s18v1_14955	1412	No	NA	2	0	0	Not-determined	Genome-fragment	NA	NA	0	1	no viral genes detected
s18v1_15128	1814	No	NA	1	0	1	Not-determined	Genome-fragment	NA	NA	0	1	no viral genes detected
s18v1_15162	1263	No	NA	2	0	1	Not-determined	Genome-fragment	NA	NA	0	1	no viral genes detected
s18v1_15195	1025	No	NA	3	0	0	Not-determined	Genome-fragment	NA	NA	0	1	no viral genes detected
s18v1_15242	36882	No	NA	51	20	0	Medium-quality	Genome-fragment	60.78	AAI-based (high-confidence)	0	1
s18v1_15353	8491	No	NA	15	1	0	Low-quality	Genome-fragment	12.48	AAI-based (medium-confidence)	0	1
s18v1_15362	1192	No	NA	1	0	0	Not-determined	Genome-fragment	NA	NA	0	1	no viral genes detected
s18v1_15373	1207	No	NA	1	0	1	Low-quality	Genome-fragment	0.15	AAI-based (high-confidence)	0	1	no viral genes detected
s18v1_15635	6963	No	NA	11	0	5	Not-determined	Genome-fragment	NA	NA	0	1	no viral genes detected
s18v1_15669	1279	No	NA	1	0	0	Not-determined	Genome-fragment	NA	NA	0	1	no viral genes detected
s18v1_15675	1673	No	NA	2	0	1	Not-determined	Genome-fragment	NA	NA	0	1	no viral genes detected
s18v1_15682	1233	No	NA	2	2	0	Low-quality	Genome-fragment	2.82	AAI-based (medium-confidence)	0	1
s18v1_15698	7991	Yes	4180	9	2	2	Low-quality	Genome-fragment	5.18	AAI-based (high-confidence)	47.69	1
s18v1_15701	178707	No	NA	228	37	14	Complete	High-quality	100	DTR (high-confidence)	0	1
s18v1_15781	1207	No	NA	2	0	0	Low-quality	Genome-fragment	1.19	AAI-based (medium-confidence)	0	1	no viral genes detected
s18v1_15811	1794	No	NA	4	0	1	Not-determined	Genome-fragment	NA	NA	0	1	no viral genes detected
s18v1_15884	1228	No	NA	2	0	0	Not-determined	Genome-fragment	NA	NA	0	1	no viral genes detected
s18v1_15954	1437	No	NA	2	0	0	Not-determined	Genome-fragment	NA	NA	0	1	no viral genes detected
s18v1_16059	1203	No	NA	2	0	0	Not-determined	Genome-fragment	NA	NA	0	1	no viral genes detected
s18v1_16087	3170	No	NA	4	0	3	Not-determined	Genome-fragment	NA	NA	0	1	no viral genes detected
s18v1_16173	1114	No	NA	1	0	1	Not-determined	Genome-fragment	NA	NA	0	1	no viral genes detected
s18v1_16190	1030	No	NA	1	0	0	Not-determined	Genome-fragment	NA	NA	0	1.05	no viral genes detected
s18v1_16400	1996	No	NA	2	0	1	Not-determined	Genome-fragment	NA	NA	0	1	no viral genes detected
s18v1_16522	1666	No	NA	2	0	1	Not-determined	Genome-fragment	NA	NA	0	1	no viral genes detected
s18v1_16721	1058	No	NA	1	0	0	Not-determined	Genome-fragment	NA	NA	0	1	no viral genes detected
s18v1_16785	3253	No	NA	3	0	1	Not-determined	Genome-fragment	NA	NA	0	1	no viral genes detected
s18v1_16905	1630	No	NA	3	0	0	Low-quality	Genome-fragment	4.45	AAI-based (high-confidence)	0	1	no viral genes detected
s18v1_17033	1119	No	NA	0	0	0	Not-determined	Genome-fragment	NA	NA	0	1	no viral genes detected
s18v1_17090	1039	No	NA	1	0	1	Not-determined	Genome-fragment	NA	NA	0	1	no viral genes detected
s18v1_17122	1346	No	NA	2	0	0	Low-quality	Genome-fragment	3.62	AAI-based (high-confidence)	0	1	no viral genes detected
s18v1_17143	1234	No	NA	3	0	0	Not-determined	Genome-fragment	NA	NA	0	1	no viral genes detected
s18v1_17319	1067	No	NA	1	0	1	Not-determined	Genome-fragment	NA	NA	0	1	no viral genes detected
s18v1_17396	1059	No	NA	2	0	0	Not-determined	Genome-fragment	NA	NA	0	1	no viral genes detected
s18v1_17504	4474	No	NA	7	0	3	Not-determined	Genome-fragment	NA	NA	0	1	no viral genes detected
s18v1_17513	1056	No	NA	1	0	1	Low-quality	Genome-fragment	2.7	AAI-based (medium-confidence)	0	1	no viral genes detected
s18v1_17600	1440	No	NA	1	0	1	Not-determined	Genome-fragment	NA	NA	0	1	no viral genes detected
s18v1_17618	2287	No	NA	3	0	2	Not-determined	Genome-fragment	NA	NA	0	1	no viral genes detected
s18v1_17696	1106	No	NA	2	0	2	Not-determined	Genome-fragment	NA	NA	0	1	no viral genes detected
s18v1_17848	10676	No	NA	17	12	0	Low-quality	Genome-fragment	26.46	AAI-based (high-confidence)	0	1
s18v1_17852	3849	No	NA	4	0	1	Not-determined	Genome-fragment	NA	NA	0	1	no viral genes detected
s18v1_17928	1746	No	NA	2	0	1	Not-determined	Genome-fragment	NA	NA	0	1	no viral genes detected
s18v1_18022	1029	No	NA	1	0	0	Not-determined	Genome-fragment	NA	NA	0	1	no viral genes detected
s18v1_18046	1180	No	NA	1	0	1	Not-determined	Genome-fragment	NA	NA	0	1	no viral genes detected
s18v1_18218	1022	No	NA	3	0	2	Not-determined	Genome-fragment	NA	NA	0	1	no viral genes detected
s18v1_18240	1646	No	NA	1	0	1	Not-determined	Genome-fragment	NA	NA	0	1	no viral genes detected
s18v1_18271	1548	No	NA	2	0	2	Not-determined	Genome-fragment	NA	NA	0	1	no viral genes detected
s18v1_18276	101212	No	NA	132	21	1	High-quality	High-quality	100	AAI-based (high-confidence)	0	1
s18v1_18307	1337	No	NA	1	0	0	Not-determined	Genome-fragment	NA	NA	0	1	no viral genes detected
s18v1_18385	5078	No	NA	6	0	5	Not-determined	Genome-fragment	NA	NA	0	1	no viral genes detected
s18v1_18566	1565	No	NA	2	0	1	Not-determined	Genome-fragment	NA	NA	0	1	no viral genes detected
s18v1_18678	1739	No	NA	6	0	0	Low-quality	Genome-fragment	1.08	AAI-based (high-confidence)	0	1	no viral genes detected
s18v1_18996	1805	No	NA	2	0	1	Not-determined	Genome-fragment	NA	NA	0	1	no viral genes detected
s18v1_19106	1660	No	NA	1	0	0	Low-quality	Genome-fragment	0.15	AAI-based (medium-confidence)	0	1	no viral genes detected
s18v1_19108	3201	No	NA	8	0	0	Low-quality	Genome-fragment	7.88	AAI-based (high-confidence)	0	1	no viral genes detected
s18v1_19237	1085	No	NA	2	0	1	Not-determined	Genome-fragment	NA	NA	0	1	no viral genes detected
s18v1_19245	1439	No	NA	3	2	0	Low-quality	Genome-fragment	3.76	AAI-based (high-confidence)	0	1
s18v1_19257	3900	No	NA	2	0	1	Not-determined	Genome-fragment	NA	NA	0	1	no viral genes detected
s18v1_19263	1150	No	NA	1	0	1	Not-determined	Genome-fragment	NA	NA	0	1	no viral genes detected
s18v1_19304	4345	No	NA	9	1	0	Low-quality	Genome-fragment	6.65	AAI-based (high-confidence)	0	1
s18v1_19385	3576	No	NA	9	5	0	Low-quality	Genome-fragment	9.42	AAI-based (high-confidence)	0	1
s18v1_19388	1090	No	NA	1	0	1	Not-determined	Genome-fragment	NA	NA	0	1	no viral genes detected
s18v1_19532	1175	No	NA	1	0	0	Not-determined	Genome-fragment	NA	NA	0	1	no viral genes detected
s18v1_19547	2394	No	NA	5	2	0	Low-quality	Genome-fragment	5.4	AAI-based (high-confidence)	0	1
s18v1_19562	1338	No	NA	4	0	0	Low-quality	Genome-fragment	2.12	AAI-based (medium-confidence)	0	1	no viral genes detected
s18v1_19590	1036	No	NA	2	0	0	Not-determined	Genome-fragment	NA	NA	0	1	no viral genes detected
s18v1_19772	1431	No	NA	1	0	1	Not-determined	Genome-fragment	NA	NA	0	1	no viral genes detected
s18v1_19892	4140	No	NA	10	0	0	Low-quality	Genome-fragment	6.71	AAI-based (high-confidence)	0	1	no viral genes detected
s18v1_19952	1337	No	NA	1	0	0	Not-determined	Genome-fragment	NA	NA	0	1	no viral genes detected
s18v1_19962	1498	No	NA	2	0	0	Not-determined	Genome-fragment	NA	NA	0	1	no viral genes detected
s18v1_20055	53859	No	NA	89	23	0	High-quality	High-quality	100	AAI-based (high-confidence)	0	1
s18v1_20101	1279	No	NA	1	0	1	Not-determined	Genome-fragment	NA	NA	0	1	no viral genes detected
s18v1_20141	1166	No	NA	1	0	1	Not-determined	Genome-fragment	NA	NA	0	1	no viral genes detected
s18v1_20179	1028	No	NA	2	0	2	Not-determined	Genome-fragment	NA	NA	0	1	no viral genes detected
s18v1_20192	1176	No	NA	3	0	2	Not-determined	Genome-fragment	NA	NA	0	1	no viral genes detected
s18v1_20233	8133	No	NA	4	0	3	Not-determined	Genome-fragment	NA	NA	0	1	no viral genes detected
s18v1_20273	2355	No	NA	4	0	1	Not-determined	Genome-fragment	NA	NA	0	1	no viral genes detected
s18v1_20431	2122	No	NA	1	0	1	Not-determined	Genome-fragment	NA	NA	0	1	no viral genes detected
s18v1_20462	1577	No	NA	1	0	1	Low-quality	Genome-fragment	2.18	AAI-based (medium-confidence)	0	1	no viral genes detected
s18v1_20469	1561	No	NA	1	0	1	Not-determined	Genome-fragment	NA	NA	0	1	no viral genes detected
s18v1_20541	1016	No	NA	2	0	0	Not-determined	Genome-fragment	NA	NA	0	1	no viral genes detected
s18v1_20579	1016	No	NA	4	3	0	Low-quality	Genome-fragment	4.58	AAI-based (high-confidence)	0	1
s18v1_20781	1378	No	NA	2	0	2	Not-determined	Genome-fragment	NA	NA	0	1	no viral genes detected
s18v1_20843	4357	No	NA	10	0	0	Low-quality	Genome-fragment	6.88	AAI-based (high-confidence)	0	1	no viral genes detected
s18v1_20916	1647	No	NA	3	0	3	Not-determined	Genome-fragment	NA	NA	0	1	no viral genes detected
s18v1_20950	1463	No	NA	3	0	0	Not-determined	Genome-fragment	NA	NA	0	1	no viral genes detected
s18v1_20986	1379	No	NA	1	0	1	Not-determined	Genome-fragment	NA	NA	0	1	no viral genes detected
s18v1_20993	1267	No	NA	2	0	0	Not-determined	Genome-fragment	NA	NA	0	1	no viral genes detected
s18v1_21107	1008	No	NA	3	0	2	Not-determined	Genome-fragment	NA	NA	0	1	no viral genes detected
s18v1_21120	1104	No	NA	2	0	2	Not-determined	Genome-fragment	NA	NA	0	1	no viral genes detected
s18v1_21149	1148	No	NA	3	0	0	Low-quality	Genome-fragment	1.38	AAI-based (medium-confidence)	0	1	no viral genes detected
s18v1_21220	1030	No	NA	2	0	1	Not-determined	Genome-fragment	NA	NA	0	1	no viral genes detected
s18v1_21375	1082	No	NA	1	0	0	Not-determined	Genome-fragment	NA	NA	0	1	no viral genes detected
s18v1_21393	15268	No	NA	19	1	3	Low-quality	Genome-fragment	6.18	AAI-based (high-confidence)	0	1
s18v1_21533	1067	No	NA	2	0	1	Not-determined	Genome-fragment	NA	NA	0	1	no viral genes detected
s18v1_21569	1109	No	NA	1	0	0	Not-determined	Genome-fragment	NA	NA	0	1	no viral genes detected
s18v1_21582	1466	No	NA	1	0	0	Not-determined	Genome-fragment	NA	NA	0	1	no viral genes detected
s18v1_21689	4236	No	NA	9	2	0	Low-quality	Genome-fragment	5.37	AAI-based (high-confidence)	0	1
s18v1_21769	3058	No	NA	3	0	3	Not-determined	Genome-fragment	NA	NA	0	1	no viral genes detected
s18v1_21921	1106	No	NA	2	0	1	Not-determined	Genome-fragment	NA	NA	0	1	no viral genes detected
s18v1_22062	1335	No	NA	2	1	0	Low-quality	Genome-fragment	6.08	AAI-based (medium-confidence)	0	1
s18v1_22077	2202	No	NA	2	0	0	Not-determined	Genome-fragment	NA	NA	0	1	no viral genes detected
s18v1_22120	11925	No	NA	12	0	1	Low-quality	Genome-fragment	13.25	AAI-based (high-confidence)	0	1	no viral genes detected
s18v1_22191	1409	No	NA	1	0	1	Not-determined	Genome-fragment	NA	NA	0	1	no viral genes detected
s18v1_22305	1034	No	NA	2	0	1	Not-determined	Genome-fragment	NA	NA	0	1	no viral genes detected
s18v1_22327	12461	No	NA	11	0	2	Not-determined	Genome-fragment	NA	NA	0	1	no viral genes detected
s18v1_22651	1011	No	NA	1	0	0	Not-determined	Genome-fragment	NA	NA	0	1	no viral genes detected
s18v1_22682	3958	No	NA	3	0	2	Not-determined	Genome-fragment	NA	NA	0	1	no viral genes detected
s18v1_22755	8114	No	NA	11	0	0	Not-determined	Genome-fragment	NA	NA	0	1	no viral genes detected
s18v1_22876	1413	No	NA	2	0	0	Low-quality	Genome-fragment	0.92	AAI-based (high-confidence)	0	1	no viral genes detected
s18v1_22920	1716	No	NA	5	0	4	Not-determined	Genome-fragment	NA	NA	0	1	no viral genes detected
s18v1_22997	1449	No	NA	3	0	1	Low-quality	Genome-fragment	0.66	AAI-based (medium-confidence)	0	1	no viral genes detected
s18v1_23055	15867	No	NA	19	9	0	Medium-quality	Genome-fragment	83.06	AAI-based (medium-confidence)	0	1
s18v1_23091	2605	No	NA	4	0	3	Not-determined	Genome-fragment	NA	NA	0	1	no viral genes detected
s18v1_23095	1982	No	NA	2	0	1	Not-determined	Genome-fragment	NA	NA	0	1	no viral genes detected
s18v1_23135	1605	No	NA	3	0	1	Low-quality	Genome-fragment	1.11	AAI-based (medium-confidence)	0	1	no viral genes detected
s18v1_23196	1573	No	NA	3	0	0	Low-quality	Genome-fragment	4.07	AAI-based (high-confidence)	0	1	no viral genes detected
s18v1_23246	46422	No	NA	77	13	0	Complete	High-quality	100	DTR (high-confidence)	0	1
s18v1_23352	4679	No	NA	6	0	6	Not-determined	Genome-fragment	NA	NA	0	1	no viral genes detected
s18v1_23398	2261	No	NA	3	0	3	Not-determined	Genome-fragment	NA	NA	0	1	no viral genes detected
s18v1_23422	1702	No	NA	3	0	0	Not-determined	Genome-fragment	NA	NA	0	1	no viral genes detected
s18v1_23432	1217	No	NA	2	0	1	Not-determined	Genome-fragment	NA	NA	0	1	no viral genes detected
s18v1_23491	1000	No	NA	1	1	0	Low-quality	Genome-fragment	2.45	AAI-based (high-confidence)	0	1
s18v1_23672	45481	No	NA	75	17	0	Complete	High-quality	100	DTR (high-confidence)	0	1
s18v1_23753	1423	No	NA	1	0	1	Not-determined	Genome-fragment	NA	NA	0	1	no viral genes detected
s18v1_23782	3301	No	NA	2	0	2	Not-determined	Genome-fragment	NA	NA	0	1	no viral genes detected
s18v1_23832	1015	No	NA	1	0	0	Not-determined	Genome-fragment	NA	NA	0	1	no viral genes detected
s18v1_24066	3837	No	NA	7	0	1	Low-quality	Genome-fragment	2.11	AAI-based (high-confidence)	0	1	no viral genes detected
s18v1_24114	1568	No	NA	2	0	2	Not-determined	Genome-fragment	NA	NA	0	1	no viral genes detected
s18v1_24255	1869	No	NA	2	0	1	Low-quality	Genome-fragment	0.54	AAI-based (medium-confidence)	0	1	no viral genes detected
s18v1_24279	1269	No	NA	2	0	0	Not-determined	Genome-fragment	NA	NA	0	1	no viral genes detected
s18v1_24670	1421	No	NA	3	0	0	Not-determined	Genome-fragment	NA	NA	0	1	no viral genes detected
s18v1_24681	1535	No	NA	3	0	2	Not-determined	Genome-fragment	NA	NA	0	1	no viral genes detected
s18v1_24739	3936	No	NA	3	0	1	Not-determined	Genome-fragment	NA	NA	0	1	no viral genes detected
s18v1_25045	39463	No	NA	66	24	0	High-quality	High-quality	100	AAI-based (high-confidence)	0	1
s18v1_25068	1183	No	NA	1	0	1	Not-determined	Genome-fragment	NA	NA	0	1	no viral genes detected
s18v1_25097	1816	No	NA	1	0	1	Not-determined	Genome-fragment	NA	NA	0	1	no viral genes detected
s18v1_25212	1238	No	NA	1	0	1	Not-determined	Genome-fragment	NA	NA	0	1	no viral genes detected
s18v1_25408	1093	No	NA	2	0	1	Low-quality	Genome-fragment	0.56	AAI-based (medium-confidence)	0	1	no viral genes detected
s18v1_25418	6993	No	NA	6	0	3	Not-determined	Genome-fragment	NA	NA	0	1	no viral genes detected
s18v1_25424	1233	No	NA	3	0	2	Not-determined	Genome-fragment	NA	NA	0	1	no viral genes detected
s18v1_25540	3368	No	NA	5	1	0	Low-quality	Genome-fragment	0.27	HMM-based (lower-bound)	0	1
s18v1_25556	1321	No	NA	2	0	2	Not-determined	Genome-fragment	NA	NA	0	1	no viral genes detected
s18v1_25780	1152	No	NA	0	0	0	Not-determined	Genome-fragment	NA	NA	0	1	no viral genes detected
s18v1_25832	3766	No	NA	3	0	1	Low-quality	Genome-fragment	5.14	AAI-based (high-confidence)	0	1	no viral genes detected
s18v1_25860	14978	No	NA	34	4	1	Low-quality	Genome-fragment	18.65	AAI-based (high-confidence)	0	1
s18v1_25917	1306	No	NA	1	0	0	Low-quality	Genome-fragment	1.74	AAI-based (medium-confidence)	0	1	no viral genes detected
s18v1_25982	1001	No	NA	2	2	0	Low-quality	Genome-fragment	1.64	AAI-based (medium-confidence)	0	1
s18v1_25992	1857	No	NA	2	1	0	Low-quality	Genome-fragment	3.08	AAI-based (high-confidence)	0	1
s18v1_26063	1102	No	NA	1	0	1	Not-determined	Genome-fragment	NA	NA	0	1	no viral genes detected
s18v1_26192	2087	No	NA	3	0	2	Not-determined	Genome-fragment	NA	NA	0	1	no viral genes detected
s18v1_26194	1008	No	NA	1	0	1	Not-determined	Genome-fragment	NA	NA	0	1	no viral genes detected
s18v1_26266	12734	No	NA	31	5	0	Low-quality	Genome-fragment	15.81	AAI-based (high-confidence)	0	1
s18v1_26316	1285	No	NA	2	0	1	Not-determined	Genome-fragment	NA	NA	0	1	no viral genes detected
s18v1_26338	1221	No	NA	2	0	0	Not-determined	Genome-fragment	NA	NA	0	1	no viral genes detected
s18v1_26500	1081	No	NA	1	0	1	Not-determined	Genome-fragment	NA	NA	0	1	no viral genes detected
s18v1_26506	1141	No	NA	1	0	1	Not-determined	Genome-fragment	NA	NA	0	1	no viral genes detected
s18v1_26548	6311	No	NA	10	0	1	Not-determined	Genome-fragment	NA	NA	0	1	no viral genes detected
s18v1_26757	1059	No	NA	1	0	1	Not-determined	Genome-fragment	NA	NA	0	1	no viral genes detected
s18v1_26975	1064	No	NA	3	0	1	Low-quality	Genome-fragment	2.85	AAI-based (high-confidence)	0	1	no viral genes detected
s18v1_27018	2004	No	NA	5	0	0	Low-quality	Genome-fragment	1.1	AAI-based (high-confidence)	0	1	no viral genes detected
s18v1_27082	4020	No	NA	8	2	0	Low-quality	Genome-fragment	7.46	AAI-based (high-confidence)	0	1
s18v1_27184	5640	No	NA	7	4	0	Low-quality	Genome-fragment	16.28	AAI-based (high-confidence)	0	1
s18v1_27258	1163	No	NA	2	0	2	Not-determined	Genome-fragment	NA	NA	0	1	no viral genes detected
s18v1_27302	2006	No	NA	2	0	2	Not-determined	Genome-fragment	NA	NA	0	1	no viral genes detected
s18v1_27499	3112	No	NA	6	0	6	Not-determined	Genome-fragment	NA	NA	0	1	no viral genes detected
s18v1_27503	16674	No	NA	22	6	0	Medium-quality	Genome-fragment	72.82	AAI-based (medium-confidence)	0	1
s18v1_27544	36625	No	NA	45	11	1	Complete	High-quality	100	DTR (high-confidence)	0	1
s18v1_27626	1377	No	NA	2	0	1	Low-quality	Genome-fragment	0.85	AAI-based (medium-confidence)	0	1	no viral genes detected
s18v1_27654	1694	No	NA	4	1	0	Low-quality	Genome-fragment	3.95	AAI-based (high-confidence)	0	1
s18v1_27701	4814	No	NA	7	0	7	Not-determined	Genome-fragment	NA	NA	0	1	no viral genes detected
s18v1_27703	1319	No	NA	1	0	1	Not-determined	Genome-fragment	NA	NA	0	1	no viral genes detected
s18v1_27778	1265	No	NA	4	0	0	Not-determined	Genome-fragment	NA	NA	0	1	no viral genes detected
s18v1_27780	1492	No	NA	4	0	0	Low-quality	Genome-fragment	3.11	AAI-based (high-confidence)	0	1	no viral genes detected
s18v1_27878	1783	No	NA	1	0	1	Low-quality	Genome-fragment	1.25	AAI-based (high-confidence)	0	1	no viral genes detected
s18v1_27887	1466	No	NA	2	0	2	Not-determined	Genome-fragment	NA	NA	0	1	no viral genes detected
s18v1_27915	1673	No	NA	1	0	0	Not-determined	Genome-fragment	NA	NA	0	1	no viral genes detected
s18v1_27966	3599	No	NA	6	0	0	Low-quality	Genome-fragment	24.14	AAI-based (medium-confidence)	0	1	no viral genes detected
s18v1_28141	117632	No	NA	83	19	2	Low-quality	Genome-fragment	44.73	AAI-based (high-confidence)	0	1
s18v1_28318	1553	No	NA	2	0	1	Not-determined	Genome-fragment	NA	NA	0	1	no viral genes detected
s18v1_28335	5782	No	NA	5	1	3	Low-quality	Genome-fragment	3.14	HMM-based (lower-bound)	0	1
s18v1_28426	3614	No	NA	5	0	0	Low-quality	Genome-fragment	9.05	AAI-based (high-confidence)	0	1	no viral genes detected
s18v1_28481	2028	No	NA	3	0	2	Not-determined	Genome-fragment	NA	NA	0	1	no viral genes detected
s18v1_28651	1201	No	NA	1	0	0	Not-determined	Genome-fragment	NA	NA	0	1	no viral genes detected
s18v1_28695	1129	No	NA	2	0	1	Not-determined	Genome-fragment	NA	NA	0	1	no viral genes detected
s18v1_28703	1219	No	NA	2	0	0	Not-determined	Genome-fragment	NA	NA	0	1	no viral genes detected
s18v1_28801	1686	No	NA	1	0	0	Not-determined	Genome-fragment	NA	NA	0	1	no viral genes detected
s18v1_28808	1026	No	NA	1	0	0	Not-determined	Genome-fragment	NA	NA	0	1	no viral genes detected
s18v1_28910	1152	No	NA	1	0	0	Not-determined	Genome-fragment	NA	NA	0	1	no viral genes detected
s18v1_29082	1588	No	NA	2	0	1	Not-determined	Genome-fragment	NA	NA	0	1	no viral genes detected
s18v1_29166	3569	No	NA	1	0	0	Low-quality	Genome-fragment	2.31	AAI-based (high-confidence)	0	1	no viral genes detected
s18v1_29208	2489	No	NA	9	0	0	Not-determined	Genome-fragment	NA	NA	0	1	no viral genes detected
s18v1_29240	2170	No	NA	2	0	1	Not-determined	Genome-fragment	NA	NA	0	1	no viral genes detected
s18v1_29291	1722	No	NA	3	0	1	Low-quality	Genome-fragment	2.18	AAI-based (medium-confidence)	0	1	no viral genes detected
s18v1_29311	1400	No	NA	1	0	1	Not-determined	Genome-fragment	NA	NA	0	1	no viral genes detected
s18v1_29345	4289	No	NA	13	1	0	Low-quality	Genome-fragment	10.94	AAI-based (high-confidence)	0	1
s18v1_29411	1486	No	NA	2	0	1	Not-determined	Genome-fragment	NA	NA	0	1	no viral genes detected
s18v1_29518	1246	No	NA	2	0	1	Not-determined	Genome-fragment	NA	NA	0	1	no viral genes detected
s18v1_29674	4603	No	NA	10	1	0	Low-quality	Genome-fragment	7.49	AAI-based (high-confidence)	0	1
s18v1_29716	1027	No	NA	2	0	0	Not-determined	Genome-fragment	NA	NA	0	1	no viral genes detected
s18v1_29821	1013	No	NA	2	0	1	Not-determined	Genome-fragment	NA	NA	0	1	no viral genes detected
s18v1_29877	2747	No	NA	3	0	2	Not-determined	Genome-fragment	NA	NA	0	1	no viral genes detected
s18v1_29879	1666	No	NA	1	0	1	Not-determined	Genome-fragment	NA	NA	0	1	no viral genes detected
s18v1_29950	1393	No	NA	1	0	0	Low-quality	Genome-fragment	3.41	AAI-based (high-confidence)	0	1	no viral genes detected
s18v1_30017	2095	No	NA	2	0	0	Low-quality	Genome-fragment	4.43	AAI-based (high-confidence)	0	1	no viral genes detected
s18v1_30095	1657	No	NA	2	0	0	Not-determined	Genome-fragment	NA	NA	0	1	no viral genes detected
s18v1_30227	3728	No	NA	4	0	2	Low-quality	Genome-fragment	7.46	AAI-based (high-confidence)	0	1	no viral genes detected
s18v1_30344	1047	No	NA	2	0	1	Not-determined	Genome-fragment	NA	NA	0	1	no viral genes detected
s18v1_30441	3417	No	NA	5	0	4	Not-determined	Genome-fragment	NA	NA	0	1	no viral genes detected
s18v1_30456	1104	No	NA	2	0	0	Low-quality	Genome-fragment	0.45	AAI-based (medium-confidence)	0	1	no viral genes detected
s18v1_30517	3192	No	NA	9	2	0	Low-quality	Genome-fragment	6.78	AAI-based (high-confidence)	0	1
s18v1_30519	1540	No	NA	2	0	2	Not-determined	Genome-fragment	NA	NA	0	1	no viral genes detected
s18v1_30589	1880	No	NA	3	0	0	Low-quality	Genome-fragment	2.34	AAI-based (high-confidence)	0	1	no viral genes detected
s18v1_30613	3558	No	NA	7	0	0	Low-quality	Genome-fragment	9.07	AAI-based (high-confidence)	0	1	no viral genes detected
s18v1_30639	29773	No	NA	17	0	15	Low-quality	Genome-fragment	14.5	AAI-based (medium-confidence)	0	1	no viral genes detected
s18v1_30682	1183	No	NA	2	0	1	Not-determined	Genome-fragment	NA	NA	0	1	no viral genes detected
s18v1_30686	1000	No	NA	1	0	0	Not-determined	Genome-fragment	NA	NA	0	1	no viral genes detected
s18v1_30850	1768	No	NA	3	0	0	Low-quality	Genome-fragment	3.73	AAI-based (medium-confidence)	0	1	no viral genes detected
s18v1_30854	1247	No	NA	1	0	0	Low-quality	Genome-fragment	3.34	AAI-based (high-confidence)	0	1	no viral genes detected
s18v1_30911	5942	No	NA	8	6	0	Low-quality	Genome-fragment	9.65	AAI-based (high-confidence)	0	1
s18v1_31016	4149	No	NA	8	2	0	Low-quality	Genome-fragment	2.58	AAI-based (high-confidence)	0	1
s18v1_31108	2837	No	NA	2	0	2	Not-determined	Genome-fragment	NA	NA	0	1	no viral genes detected
s18v1_31171	4002	No	NA	8	0	0	Not-determined	Genome-fragment	NA	NA	0	1	no viral genes detected
s18v1_31273	1204	No	NA	3	0	3	Not-determined	Genome-fragment	NA	NA	0	1	no viral genes detected
s18v1_31420	15073	No	NA	17	5	0	Medium-quality	Genome-fragment	50.58	HMM-based (lower-bound)	0	1	low-confidence ITR
s18v1_31472	1103	No	NA	1	0	0	Not-determined	Genome-fragment	NA	NA	0	1	no viral genes detected
s18v1_31595	1425	No	NA	2	0	2	Not-determined	Genome-fragment	NA	NA	0	1	no viral genes detected
s18v1_31649	1827	No	NA	2	0	0	Not-determined	Genome-fragment	NA	NA	0	1	no viral genes detected
s18v1_31831	1220	No	NA	1	0	1	Not-determined	Genome-fragment	NA	NA	0	1	no viral genes detected
s18v1_32074	1022	No	NA	3	0	0	Not-determined	Genome-fragment	NA	NA	0	1	no viral genes detected
s18v1_32184	1232	No	NA	2	0	1	Not-determined	Genome-fragment	NA	NA	0	1	no viral genes detected
s18v1_32254	1451	No	NA	1	0	0	Not-determined	Genome-fragment	NA	NA	0	1	no viral genes detected
s18v1_32302	1203	No	NA	2	0	1	Not-determined	Genome-fragment	NA	NA	0	1	no viral genes detected
s18v1_32337	1101	No	NA	1	0	1	Not-determined	Genome-fragment	NA	NA	0	1	no viral genes detected
s18v1_32376	2255	No	NA	1	0	1	Not-determined	Genome-fragment	NA	NA	0	1	no viral genes detected
s18v1_32417	1463	No	NA	2	0	2	Not-determined	Genome-fragment	NA	NA	0	1	no viral genes detected
s18v1_32442	1337	No	NA	4	0	0	Not-determined	Genome-fragment	NA	NA	0	1	no viral genes detected
s18v1_32457	3210	No	NA	3	0	1	Not-determined	Genome-fragment	NA	NA	0	1	no viral genes detected
s18v1_32612	3139	No	NA	3	0	1	Not-determined	Genome-fragment	NA	NA	0	1	no viral genes detected
s18v1_32636	1002	No	NA	2	0	2	Not-determined	Genome-fragment	NA	NA	0	1	no viral genes detected
s18v1_32657	5044	No	NA	4	0	2	Not-determined	Genome-fragment	NA	NA	0	1	no viral genes detected
s18v1_32727	1636	No	NA	2	0	1	Not-determined	Genome-fragment	NA	NA	0	1	no viral genes detected
s18v1_32754	1289	No	NA	1	0	1	Not-determined	Genome-fragment	NA	NA	0	1	no viral genes detected
s18v1_32811	1278	No	NA	3	0	0	Not-determined	Genome-fragment	NA	NA	0	1	no viral genes detected
s18v1_32838	3421	No	NA	4	0	3	Not-determined	Genome-fragment	NA	NA	0	1	no viral genes detected
s18v1_32855	1636	No	NA	2	0	1	Not-determined	Genome-fragment	NA	NA	0	1	no viral genes detected
s18v1_32862	1047	No	NA	2	0	1	Not-determined	Genome-fragment	NA	NA	0	1	no viral genes detected
s18v1_32891	1911	No	NA	1	0	1	Not-determined	Genome-fragment	NA	NA	0	1	no viral genes detected
s18v1_32907	1427	No	NA	1	0	1	Not-determined	Genome-fragment	NA	NA	0	1	no viral genes detected
s18v1_33039	1484	No	NA	3	0	2	Low-quality	Genome-fragment	2.2	AAI-based (medium-confidence)	0	1	no viral genes detected
s18v1_33119	2275	No	NA	2	0	1	Low-quality	Genome-fragment	0.34	AAI-based (medium-confidence)	0	1	no viral genes detected
s18v1_33273	1072	No	NA	2	0	1	Not-determined	Genome-fragment	NA	NA	0	1	no viral genes detected
s18v1_33339	1047	No	NA	1	0	0	Not-determined	Genome-fragment	NA	NA	0	1	no viral genes detected
s18v1_33401	1085	No	NA	2	0	1	Not-determined	Genome-fragment	NA	NA	0	1	no viral genes detected
s18v1_33522	5252	No	NA	8	2	0	Low-quality	Genome-fragment	18.39	HMM-based (lower-bound)	0	1
s18v1_33771	1326	No	NA	1	0	1	Not-determined	Genome-fragment	NA	NA	0	1	no viral genes detected
s18v1_33802	1099	No	NA	2	0	2	Not-determined	Genome-fragment	NA	NA	0	1	no viral genes detected
s18v1_33894	1035	No	NA	2	0	2	Not-determined	Genome-fragment	NA	NA	0	1	no viral genes detected
s18v1_33904	1238	No	NA	3	0	2	Not-determined	Genome-fragment	NA	NA	0	1	no viral genes detected
s18v1_33957	1017	No	NA	1	0	1	Not-determined	Genome-fragment	NA	NA	0	1	no viral genes detected
s18v1_34022	1441	No	NA	4	0	3	Not-determined	Genome-fragment	NA	NA	0	1	no viral genes detected
s18v1_34216	1263	No	NA	1	0	0	Not-determined	Genome-fragment	NA	NA	0	1	no viral genes detected
s18v1_34353	2361	No	NA	6	1	0	Low-quality	Genome-fragment	1.55	AAI-based (medium-confidence)	0	1
s18v1_34410	1793	No	NA	2	0	2	Low-quality	Genome-fragment	0.38	AAI-based (medium-confidence)	0	1	no viral genes detected
s18v1_34654	1016	No	NA	2	0	1	Not-determined	Genome-fragment	NA	NA	0	1	no viral genes detected
s18v1_34947	1494	No	NA	1	0	1	Low-quality	Genome-fragment	1.58	AAI-based (high-confidence)	0	1	no viral genes detected
s18v1_34952	1120	No	NA	1	0	1	Not-determined	Genome-fragment	NA	NA	0	1	no viral genes detected
s18v1_34987	1271	No	NA	2	0	0	Not-determined	Genome-fragment	NA	NA	0	1	no viral genes detected
s18v1_35002	1158	No	NA	1	0	0	Not-determined	Genome-fragment	NA	NA	0	1	no viral genes detected
s18v1_35053	1826	No	NA	3	0	1	Not-determined	Genome-fragment	NA	NA	0	1	no viral genes detected
s18v1_35122	1012	No	NA	1	0	0	Not-determined	Genome-fragment	NA	NA	0	1	no viral genes detected
s18v1_35138	1278	No	NA	1	0	1	Not-determined	Genome-fragment	NA	NA	0	1	no viral genes detected
s18v1_35144	1148	No	NA	2	0	1	Not-determined	Genome-fragment	NA	NA	0	1	no viral genes detected
s18v1_35186	1026	No	NA	2	0	0	Low-quality	Genome-fragment	2.91	AAI-based (high-confidence)	0	1	no viral genes detected
s18v1_35208	1388	No	NA	2	0	0	Low-quality	Genome-fragment	1.74	AAI-based (high-confidence)	0	1	no viral genes detected
s18v1_35221	1574	No	NA	3	0	2	Not-determined	Genome-fragment	NA	NA	0	1	no viral genes detected
s18v1_35246	1224	No	NA	1	0	1	Not-determined	Genome-fragment	NA	NA	0	1	no viral genes detected
s18v1_35301	3976	No	NA	6	0	1	Not-determined	Genome-fragment	NA	NA	0	1	no viral genes detected
s18v1_35322	1014	No	NA	2	0	2	Not-determined	Genome-fragment	NA	NA	0	1	no viral genes detected
s18v1_35392	1295	No	NA	3	0	1	Not-determined	Genome-fragment	NA	NA	0	1	no viral genes detected
s18v1_35417	1270	No	NA	2	0	0	Not-determined	Genome-fragment	NA	NA	0	1	no viral genes detected
s18v1_35662	1202	No	NA	1	0	1	Not-determined	Genome-fragment	NA	NA	0	1	no viral genes detected
s18v1_35701	2243	No	NA	2	0	1	Not-determined	Genome-fragment	NA	NA	0	1	no viral genes detected
s18v1_35813	1081	No	NA	4	2	0	Low-quality	Genome-fragment	2.77	AAI-based (high-confidence)	0	1
s18v1_35829	1316	No	NA	3	0	1	Not-determined	Genome-fragment	NA	NA	0	1	no viral genes detected
s18v1_35892	1155	No	NA	1	0	1	Not-determined	Genome-fragment	NA	NA	0	1	no viral genes detected
s18v1_35963	6051	No	NA	5	1	0	Low-quality	Genome-fragment	3.76	AAI-based (high-confidence)	0	1
s18v1_35984	1217	No	NA	2	0	0	Low-quality	Genome-fragment	2.64	AAI-based (medium-confidence)	0	1	no viral genes detected
s18v1_36118	1564	No	NA	2	0	1	Not-determined	Genome-fragment	NA	NA	0	1	no viral genes detected
s18v1_36213	2816	No	NA	5	0	0	Not-determined	Genome-fragment	NA	NA	0	1	no viral genes detected
s18v1_36347	3744	No	NA	4	0	3	Not-determined	Genome-fragment	NA	NA	0	1	no viral genes detected
s18v1_36376	1340	No	NA	2	0	1	Not-determined	Genome-fragment	NA	NA	0	1	no viral genes detected
s18v1_36409	3625	No	NA	3	0	2	Not-determined	Genome-fragment	NA	NA	0	1	no viral genes detected
s18v1_36463	1387	No	NA	2	0	0	Not-determined	Genome-fragment	NA	NA	0	1	no viral genes detected
s18v1_36464	1984	No	NA	3	0	1	Not-determined	Genome-fragment	NA	NA	0	1	no viral genes detected
s18v1_36473	1115	No	NA	2	0	0	Not-determined	Genome-fragment	NA	NA	0	1	no viral genes detected
s18v1_36609	1075	No	NA	1	0	1	Not-determined	Genome-fragment	NA	NA	0	1	no viral genes detected
s18v1_36641	135400	No	NA	177	37	5	Complete	High-quality	100	DTR (high-confidence)	0	1
s18v1_36713	4331	No	NA	4	0	4	Not-determined	Genome-fragment	NA	NA	0	1	no viral genes detected
s18v1_36717	1665	No	NA	2	0	2	Low-quality	Genome-fragment	0.95	AAI-based (high-confidence)	0	1	no viral genes detected
s18v1_36741	1465	No	NA	2	0	1	Not-determined	Genome-fragment	NA	NA	0	1	no viral genes detected
s18v1_37056	1856	No	NA	3	0	1	Not-determined	Genome-fragment	NA	NA	0	1	no viral genes detected
s18v1_37098	4305	No	NA	3	0	2	Not-determined	Genome-fragment	NA	NA	0	1	no viral genes detected
s18v1_37138	1377	No	NA	1	0	1	Not-determined	Genome-fragment	NA	NA	0	1	no viral genes detected
s18v1_37147	1120	No	NA	1	0	0	Not-determined	Genome-fragment	NA	NA	0	1	no viral genes detected
s18v1_37150	2158	No	NA	2	0	2	Low-quality	Genome-fragment	5.66	AAI-based (high-confidence)	0	1	no viral genes detected
s18v1_37163	1102	No	NA	1	0	0	Not-determined	Genome-fragment	NA	NA	0	1	no viral genes detected
s18v1_37267	3225	No	NA	3	0	2	Low-quality	Genome-fragment	9.39	AAI-based (medium-confidence)	0	1	no viral genes detected
s18v1_37290	1068	No	NA	2	0	0	Low-quality	Genome-fragment	1.9	AAI-based (high-confidence)	0	1	no viral genes detected
s18v1_37349	1565	No	NA	1	0	0	Not-determined	Genome-fragment	NA	NA	0	1	no viral genes detected
s18v1_37461	53636	No	NA	79	12	0	High-quality	High-quality	100	AAI-based (high-confidence)	0	1
s18v1_37473	1148	No	NA	2	0	0	Not-determined	Genome-fragment	NA	NA	0	1	no viral genes detected
s18v1_37492	1069	No	NA	1	0	1	Not-determined	Genome-fragment	NA	NA	0	1	no viral genes detected
s18v1_37566	1070	No	NA	2	0	0	Not-determined	Genome-fragment	NA	NA	0	1	no viral genes detected
s18v1_37620	1919	No	NA	2	0	1	Not-determined	Genome-fragment	NA	NA	0	1	no viral genes detected
s18v1_37635	49496	No	NA	80	20	0	Complete	High-quality	100	DTR (high-confidence)	0	1
s18v1_37650	1423	No	NA	1	0	0	Low-quality	Genome-fragment	1.1	AAI-based (high-confidence)	0	1	no viral genes detected
s18v1_37693	32504	No	NA	39	12	0	Medium-quality	Genome-fragment	67.51	AAI-based (high-confidence)	0	1
s18v1_37818	1073	No	NA	3	0	2	Low-quality	Genome-fragment	0.67	AAI-based (medium-confidence)	0	1	no viral genes detected
s18v1_37887	1285	No	NA	2	0	1	Not-determined	Genome-fragment	NA	NA	0	1	no viral genes detected
s18v1_37905	1128	No	NA	1	0	1	Not-determined	Genome-fragment	NA	NA	0	1	no viral genes detected
s18v1_37921	3206	No	NA	5	1	0	Low-quality	Genome-fragment	8.3	AAI-based (high-confidence)	0	1
s18v1_38186	1198	No	NA	1	0	1	Not-determined	Genome-fragment	NA	NA	0	1	no viral genes detected
s18v1_38307	1169	No	NA	1	0	0	Not-determined	Genome-fragment	NA	NA	0	1	no viral genes detected
s18v1_38394	1393	No	NA	1	0	0	Not-determined	Genome-fragment	NA	NA	0	1	no viral genes detected
s18v1_38428	5120	No	NA	12	2	0	Low-quality	Genome-fragment	9.36	AAI-based (high-confidence)	0	1
s18v1_38615	1161	No	NA	2	0	0	Not-determined	Genome-fragment	NA	NA	0	1	no viral genes detected
s18v1_38884	1642	No	NA	4	0	1	Not-determined	Genome-fragment	NA	NA	0	1	no viral genes detected
s18v1_38917	9398	No	NA	10	0	4	Not-determined	Genome-fragment	NA	NA	0	1	no viral genes detected
s18v1_38972	1473	No	NA	5	3	0	Low-quality	Genome-fragment	3.63	AAI-based (high-confidence)	0	1
s18v1_39006	2276	No	NA	7	2	0	Low-quality	Genome-fragment	5.11	AAI-based (high-confidence)	0	1
s18v1_39068	1363	No	NA	1	0	1	Not-determined	Genome-fragment	NA	NA	0	1	no viral genes detected
s18v1_39086	1123	No	NA	2	0	0	Not-determined	Genome-fragment	NA	NA	0	1	no viral genes detected
s18v1_39099	2100	No	NA	4	0	3	Low-quality	Genome-fragment	1.02	AAI-based (medium-confidence)	0	1	no viral genes detected
s18v1_39106	1263	No	NA	3	0	2	Not-determined	Genome-fragment	NA	NA	0	1	no viral genes detected
s18v1_39113	5583	No	NA	12	3	0	Low-quality	Genome-fragment	9.45	AAI-based (high-confidence)	0	1
s18v1_39157	1214	No	NA	3	0	1	Not-determined	Genome-fragment	NA	NA	0	1	no viral genes detected
s18v1_39162	1554	No	NA	3	0	3	Not-determined	Genome-fragment	NA	NA	0	1	no viral genes detected
s18v1_39205	1094	No	NA	1	0	0	Low-quality	Genome-fragment	0.75	AAI-based (high-confidence)	0	1	no viral genes detected
s18v1_39339	1460	No	NA	1	0	1	Not-determined	Genome-fragment	NA	NA	0	1.05	no viral genes detected
s18v1_39394	1035	No	NA	2	0	0	Not-determined	Genome-fragment	NA	NA	0	1	no viral genes detected
s18v1_39439	2297	No	NA	7	2	0	Low-quality	Genome-fragment	5.17	AAI-based (high-confidence)	0	1
s18v1_39716	1099	No	NA	3	0	3	Not-determined	Genome-fragment	NA	NA	0	1	no viral genes detected
s18v1_39930	1149	No	NA	4	0	0	Low-quality	Genome-fragment	0.29	AAI-based (high-confidence)	0	1	no viral genes detected
s18v1_39936	1233	No	NA	1	0	1	Not-determined	Genome-fragment	NA	NA	0	1	no viral genes detected
s18v1_39997	1483	No	NA	2	0	2	Not-determined	Genome-fragment	NA	NA	0	1	no viral genes detected
s18v1_40045	1098	No	NA	5	0	0	Low-quality	Genome-fragment	1.89	AAI-based (high-confidence)	0	1	no viral genes detected
s18v1_40269	1019	No	NA	1	0	0	Not-determined	Genome-fragment	NA	NA	0	1	no viral genes detected
s18v1_40275	1229	No	NA	2	0	1	Not-determined	Genome-fragment	NA	NA	0	1	no viral genes detected
s18v1_40277	1885	No	NA	1	0	0	Not-determined	Genome-fragment	NA	NA	0	1	no viral genes detected
s18v1_40386	1221	No	NA	2	0	2	Not-determined	Genome-fragment	NA	NA	0	1	no viral genes detected
s18v1_40389	1848	No	NA	8	0	0	Not-determined	Genome-fragment	NA	NA	0	1	no viral genes detected; low-confidence DTR
s18v1_40393	2024	No	NA	3	0	1	Not-determined	Genome-fragment	NA	NA	0	1	no viral genes detected
s18v1_40458	3664	No	NA	5	0	4	Not-determined	Genome-fragment	NA	NA	0	1	no viral genes detected
s18v1_40494	1158	No	NA	2	0	1	Not-determined	Genome-fragment	NA	NA	0	1	no viral genes detected
s18v1_40611	1125	No	NA	2	0	1	Not-determined	Genome-fragment	NA	NA	0	1	no viral genes detected
s18v1_40638	4055	No	NA	9	0	0	Not-determined	Genome-fragment	NA	NA	0	1	no viral genes detected
s18v1_40650	1216	No	NA	2	0	0	Not-determined	Genome-fragment	NA	NA	0	1	no viral genes detected
s18v1_40658	2090	No	NA	1	0	0	Low-quality	Genome-fragment	3.49	AAI-based (high-confidence)	0	1	no viral genes detected
s18v1_40721	1075	No	NA	2	0	1	Not-determined	Genome-fragment	NA	NA	0	1	no viral genes detected
s18v1_40736	1630	No	NA	2	0	2	Not-determined	Genome-fragment	NA	NA	0	1	no viral genes detected
s18v1_40763	1395	No	NA	2	0	2	Not-determined	Genome-fragment	NA	NA	0	1	no viral genes detected
s18v1_40766	1141	No	NA	2	0	0	Not-determined	Genome-fragment	NA	NA	0	1	no viral genes detected
s18v1_40822	1315	No	NA	2	0	1	Not-determined	Genome-fragment	NA	NA	0	1	no viral genes detected
s18v1_40829	1133	No	NA	3	1	0	Low-quality	Genome-fragment	2.54	AAI-based (high-confidence)	0	1
s18v1_40961	1074	No	NA	1	0	1	Not-determined	Genome-fragment	NA	NA	0	1	no viral genes detected
s18v1_41033	1137	No	NA	3	1	0	Low-quality	Genome-fragment	2.53	AAI-based (high-confidence)	0	1
s18v1_41176	3297	No	NA	5	1	0	Low-quality	Genome-fragment	8.52	AAI-based (medium-confidence)	0	1
s18v1_41279	1022	No	NA	2	0	1	Not-determined	Genome-fragment	NA	NA	0	1	no viral genes detected
s18v1_41754	4021	No	NA	3	0	0	Low-quality	Genome-fragment	1.59	AAI-based (high-confidence)	0	1	no viral genes detected
s18v1_41974	3166	No	NA	4	0	0	Low-quality	Genome-fragment	8.01	AAI-based (high-confidence)	0	1	no viral genes detected
s18v1_42028	1123	No	NA	2	0	0	Not-determined	Genome-fragment	NA	NA	0	1	no viral genes detected
s18v1_42074	36484	No	NA	50	20	0	Complete	High-quality	100	DTR (high-confidence)	0	1
s18v1_42282	1520	No	NA	3	0	3	Not-determined	Genome-fragment	NA	NA	0	1	no viral genes detected
s18v1_42359	1326	No	NA	1	0	1	Not-determined	Genome-fragment	NA	NA	0	1	no viral genes detected
s18v1_42389	1215	No	NA	2	0	0	Not-determined	Genome-fragment	NA	NA	0	1	no viral genes detected
s18v1_42400	1013	No	NA	1	0	1	Not-determined	Genome-fragment	NA	NA	0	1	no viral genes detected
s18v1_42418	1032	No	NA	2	0	2	Not-determined	Genome-fragment	NA	NA	0	1	no viral genes detected
s18v1_42613	2266	Yes	627	5	1	1	Low-quality	Genome-fragment	0.97	AAI-based (high-confidence)	72.33	1
s18v1_42717	1611	No	NA	2	0	1	Not-determined	Genome-fragment	NA	NA	0	1	no viral genes detected
s18v1_42799	4020	No	NA	4	1	0	Low-quality	Genome-fragment	2.1	HMM-based (lower-bound)	0	1
s18v1_43036	4244	Yes	3171	4	1	1	Low-quality	Genome-fragment	3.93	AAI-based (high-confidence)	25.28	1
s18v1_43059	64399	No	NA	80	14	1	Complete	High-quality	100	DTR (high-confidence)	0	1
s18v1_43064	1833	No	NA	2	0	2	Not-determined	Genome-fragment	NA	NA	0	1	no viral genes detected
s18v1_43339	1460	No	NA	2	0	2	Not-determined	Genome-fragment	NA	NA	0	1	no viral genes detected
s18v1_43370	1203	No	NA	2	0	1	Not-determined	Genome-fragment	NA	NA	0	1	no viral genes detected
s18v1_43409	1693	No	NA	3	0	2	Not-determined	Genome-fragment	NA	NA	0	1	no viral genes detected
s18v1_43516	2526	No	NA	1	0	1	Low-quality	Genome-fragment	4.54	AAI-based (medium-confidence)	0	1	no viral genes detected
s18v1_43586	1410	No	NA	1	0	1	Not-determined	Genome-fragment	NA	NA	0	1	no viral genes detected
s18v1_43598	1137	No	NA	2	0	1	Not-determined	Genome-fragment	NA	NA	0	1	no viral genes detected
s18v1_43702	1798	No	NA	1	0	0	Not-determined	Genome-fragment	NA	NA	0	1	no viral genes detected
s18v1_43720	1364	No	NA	1	0	0	Not-determined	Genome-fragment	NA	NA	0	1	no viral genes detected
s18v1_43976	1255	No	NA	1	0	0	Not-determined	Genome-fragment	NA	NA	0	1	no viral genes detected
s18v1_44035	2028	No	NA	4	0	0	Low-quality	Genome-fragment	2.17	AAI-based (high-confidence)	0	1	no viral genes detected
s18v1_44048	1031	No	NA	1	0	0	Not-determined	Genome-fragment	NA	NA	0	1	no viral genes detected
s18v1_44055	1031	No	NA	3	0	3	Low-quality	Genome-fragment	0.42	AAI-based (medium-confidence)	0	1	no viral genes detected
s18v1_44340	6456	No	NA	3	0	0	Low-quality	Genome-fragment	2.61	AAI-based (high-confidence)	0	1	no viral genes detected
s18v1_44383	1108	No	NA	1	0	0	Not-determined	Genome-fragment	NA	NA	0	1	no viral genes detected
s18v1_44457	1012	No	NA	1	0	1	Not-determined	Genome-fragment	NA	NA	0	1	no viral genes detected
s18v1_44601	1456	No	NA	3	0	1	Not-determined	Genome-fragment	NA	NA	0	1	no viral genes detected
s18v1_44777	1400	No	NA	1	0	1	Not-determined	Genome-fragment	NA	NA	0	1	no viral genes detected
s18v1_44908	2176	No	NA	1	0	1	Not-determined	Genome-fragment	NA	NA	0	1	no viral genes detected
s18v1_45133	1014	No	NA	3	0	0	Not-determined	Genome-fragment	NA	NA	0	1	no viral genes detected
s18v1_45235	1121	No	NA	2	0	2	Not-determined	Genome-fragment	NA	NA	0	1	no viral genes detected
s18v1_45501	2173	No	NA	2	0	0	Not-determined	Genome-fragment	NA	NA	0	1	no viral genes detected
s18v1_45549	1378	No	NA	1	0	1	Not-determined	Genome-fragment	NA	NA	0	1	no viral genes detected
s18v1_45564	2526	No	NA	6	0	5	Low-quality	Genome-fragment	6.62	AAI-based (medium-confidence)	0	1	no viral genes detected
s18v1_45749	1400	No	NA	4	0	0	Not-determined	Genome-fragment	NA	NA	0	1	no viral genes detected
s18v1_45768	1255	No	NA	1	0	1	Not-determined	Genome-fragment	NA	NA	0	1	no viral genes detected
s18v1_45788	1140	No	NA	1	0	0	Not-determined	Genome-fragment	NA	NA	0	1	no viral genes detected
s18v1_45858	1125	No	NA	3	0	0	Not-determined	Genome-fragment	NA	NA	0	1	no viral genes detected
s18v1_45913	3700	No	NA	3	0	2	Not-determined	Genome-fragment	NA	NA	0	1	no viral genes detected
s18v1_45931	1852	No	NA	4	0	3	Low-quality	Genome-fragment	0.39	AAI-based (high-confidence)	0	1	no viral genes detected
s18v1_45969	1142	No	NA	1	0	1	Not-determined	Genome-fragment	NA	NA	0	1	no viral genes detected
s18v1_45975	1450	No	NA	3	0	0	Not-determined	Genome-fragment	NA	NA	0	1	no viral genes detected
s18v1_46254	3055	No	NA	3	3	0	Low-quality	Genome-fragment	9.2	AAI-based (high-confidence)	0	1
s18v1_46448	1361	No	NA	2	0	1	Not-determined	Genome-fragment	NA	NA	0	1	no viral genes detected
s18v1_46529	1348	No	NA	2	0	0	Not-determined	Genome-fragment	NA	NA	0	1	no viral genes detected
s18v1_46694	3485	No	NA	2	0	0	Not-determined	Genome-fragment	NA	NA	0	1	no viral genes detected
s18v1_46891	3142	No	NA	4	0	2	Low-quality	Genome-fragment	1.74	AAI-based (high-confidence)	0	1	no viral genes detected
s18v1_46964	1051	No	NA	3	0	0	Low-quality	Genome-fragment	0.56	AAI-based (high-confidence)	0	1	no viral genes detected
s18v1_47267	2360	No	NA	2	0	0	Not-determined	Genome-fragment	NA	NA	0	1	no viral genes detected
s18v1_47314	1888	No	NA	1	0	1	Not-determined	Genome-fragment	NA	NA	0	1	no viral genes detected
s18v1_47343	4223	Yes	3150	4	1	1	Low-quality	Genome-fragment	3.91	AAI-based (high-confidence)	25.41	1
s18v1_47401	1008	No	NA	2	0	1	Not-determined	Genome-fragment	NA	NA	0	1	no viral genes detected
s18v1_47449	5367	No	NA	6	0	2	Not-determined	Genome-fragment	NA	NA	0	1	no viral genes detected
s18v1_47619	1281	No	NA	3	0	3	Not-determined	Genome-fragment	NA	NA	0	1	no viral genes detected
s18v1_47636	1409	No	NA	1	0	1	Not-determined	Genome-fragment	NA	NA	0	1	no viral genes detected
s18v1_47754	1044	No	NA	1	0	0	Not-determined	Genome-fragment	NA	NA	0	1	no viral genes detected
s18v1_47935	2920	No	NA	5	0	2	Not-determined	Genome-fragment	NA	NA	0	1	no viral genes detected
s18v1_48012	2633	No	NA	1	0	1	Not-determined	Genome-fragment	NA	NA	0	1	no viral genes detected
s18v1_48025	1513	No	NA	1	0	1	Low-quality	Genome-fragment	1.13	AAI-based (medium-confidence)	0	1	no viral genes detected
s18v1_48298	1313	No	NA	3	0	2	Not-determined	Genome-fragment	NA	NA	0	1	no viral genes detected
s18v1_48547	1267	No	NA	1	0	0	Not-determined	Genome-fragment	NA	NA	0	1	no viral genes detected
s18v1_48596	1260	No	NA	3	2	0	Low-quality	Genome-fragment	3.34	AAI-based (high-confidence)	0	1
s18v1_48665	1025	No	NA	2	0	0	Not-determined	Genome-fragment	NA	NA	0	1	no viral genes detected
s18v1_48693	3400	No	NA	3	0	3	Not-determined	Genome-fragment	NA	NA	0	1	no viral genes detected
s18v1_48752	9446	No	NA	12	0	1	Not-determined	Genome-fragment	NA	NA	0	1	no viral genes detected
s18v1_48870	1058	No	NA	1	0	0	Not-determined	Genome-fragment	NA	NA	0	1	no viral genes detected
s18v1_48873	1322	No	NA	1	0	1	Not-determined	Genome-fragment	NA	NA	0	1	no viral genes detected
s18v1_48900	1806	No	NA	2	0	1	Not-determined	Genome-fragment	NA	NA	0	1	no viral genes detected
s18v1_49029	1923	No	NA	1	0	0	Not-determined	Genome-fragment	NA	NA	0	1	no viral genes detected
s18v1_49193	1573	No	NA	2	0	2	Not-determined	Genome-fragment	NA	NA	0	1	no viral genes detected
s18v1_49278	4156	No	NA	3	0	0	Not-determined	Genome-fragment	NA	NA	0	1	no viral genes detected
s18v1_49320	1287	No	NA	2	0	2	Not-determined	Genome-fragment	NA	NA	0	1	no viral genes detected
s18v1_49343	3874	No	NA	3	0	0	Not-determined	Genome-fragment	NA	NA	0	1	no viral genes detected
s18v1_49380	2245	No	NA	2	0	0	Low-quality	Genome-fragment	5.94	AAI-based (high-confidence)	0	1	no viral genes detected
s18v1_49386	1550	No	NA	1	0	1	Not-determined	Genome-fragment	NA	NA	0	1	no viral genes detected
s18v1_49507	1468	No	NA	3	0	0	Low-quality	Genome-fragment	2.52	AAI-based (high-confidence)	0	1	no viral genes detected
s18v1_49711	1680	No	NA	4	0	0	Low-quality	Genome-fragment	5.1	AAI-based (high-confidence)	0	1	no viral genes detected
s18v1_49730	1308	No	NA	2	0	2	Not-determined	Genome-fragment	NA	NA	0	1	no viral genes detected
s18v1_49743	1466	No	NA	2	0	0	Not-determined	Genome-fragment	NA	NA	0	1	no viral genes detected
s18v1_49777	1216	No	NA	1	0	1	Not-determined	Genome-fragment	NA	NA	0	1	no viral genes detected
s18v1_49781	91647	No	NA	84	10	0	High-quality	High-quality	98.37	AAI-based (high-confidence)	0	1
s18v1_50052	1210	No	NA	2	0	0	Not-determined	Genome-fragment	NA	NA	0	1	no viral genes detected
s18v1_50071	1078	No	NA	3	0	0	Not-determined	Genome-fragment	NA	NA	0	1	no viral genes detected
s18v1_50201	1326	No	NA	2	0	1	Not-determined	Genome-fragment	NA	NA	0	1	no viral genes detected
s18v1_50249	1878	No	NA	2	0	2	Not-determined	Genome-fragment	NA	NA	0	1	no viral genes detected
s18v1_50262	1485	No	NA	2	0	1	Not-determined	Genome-fragment	NA	NA	0	1	no viral genes detected
s18v1_50289	2058	No	NA	1	1	0	Low-quality	Genome-fragment	0.32	AAI-based (high-confidence)	0	1
s18v1_50335	2362	No	NA	3	0	0	Not-determined	Genome-fragment	NA	NA	0	1	no viral genes detected
s18v1_50401	1501	No	NA	1	0	1	Not-determined	Genome-fragment	NA	NA	0	1	no viral genes detected
s18v1_50403	3106	No	NA	4	0	3	Not-determined	Genome-fragment	NA	NA	0	1	no viral genes detected
s18v1_50404	1157	No	NA	2	0	2	Not-determined	Genome-fragment	NA	NA	0	1	no viral genes detected
s18v1_50434	2345	No	NA	1	0	0	Not-determined	Genome-fragment	NA	NA	0	1	no viral genes detected
s18v1_50505	4599	No	NA	4	0	4	Low-quality	Genome-fragment	1.82	AAI-based (medium-confidence)	0	1	no viral genes detected
s18v1_50513	1128	No	NA	2	0	0	Not-determined	Genome-fragment	NA	NA	0	1	no viral genes detected
s18v1_50533	1391	No	NA	1	0	1	Not-determined	Genome-fragment	NA	NA	0	1	no viral genes detected
s18v1_50657	1156	No	NA	2	0	2	Not-determined	Genome-fragment	NA	NA	0	1	no viral genes detected
s18v1_50670	5248	No	NA	7	0	1	Not-determined	Genome-fragment	NA	NA	0	1	no viral genes detected
s18v1_50703	1596	No	NA	1	0	0	Low-quality	Genome-fragment	13.44	AAI-based (medium-confidence)	0	1	no viral genes detected
s18v1_50758	1498	No	NA	2	0	0	Not-determined	Genome-fragment	NA	NA	0	1	no viral genes detected
s18v1_50801	1790	No	NA	2	0	1	Not-determined	Genome-fragment	NA	NA	0	1	no viral genes detected
s18v1_50811	2005	No	NA	2	0	1	Low-quality	Genome-fragment	1.1	AAI-based (medium-confidence)	0	1	no viral genes detected
s18v1_51020	1648	No	NA	4	0	0	Low-quality	Genome-fragment	3.69	AAI-based (high-confidence)	0	1	no viral genes detected
s18v1_51031	1899	No	NA	1	0	1	Not-determined	Genome-fragment	NA	NA	0	1	no viral genes detected
s18v1_51051	1199	No	NA	1	0	1	Not-determined	Genome-fragment	NA	NA	0	1	no viral genes detected
s18v1_51258	3947	Yes	2156	7	2	1	Low-quality	Genome-fragment	5.37	AAI-based (high-confidence)	45.38	1
s18v1_51303	3524	No	NA	4	0	0	Low-quality	Genome-fragment	3	AAI-based (high-confidence)	0	1	no viral genes detected
s18v1_51373	10825	No	NA	14	0	6	Not-determined	Genome-fragment	NA	NA	0	1	no viral genes detected
s18v1_51377	2230	No	NA	1	0	0	Low-quality	Genome-fragment	4.97	AAI-based (high-confidence)	0	1	no viral genes detected
s18v1_51451	1236	No	NA	2	0	1	Not-determined	Genome-fragment	NA	NA	0	1	no viral genes detected
s18v1_51589	1252	No	NA	2	0	1	Not-determined	Genome-fragment	NA	NA	0	1	no viral genes detected
s18v1_51606	4393	No	NA	6	0	4	Not-determined	Genome-fragment	NA	NA	0	1	no viral genes detected
s18v1_51810	1293	No	NA	2	0	0	Not-determined	Genome-fragment	NA	NA	0	1	no viral genes detected
s18v1_51851	1016	No	NA	1	0	1	Not-determined	Genome-fragment	NA	NA	0	1	no viral genes detected
s18v1_51861	2315	No	NA	1	0	1	Not-determined	Genome-fragment	NA	NA	0	1	no viral genes detected
s18v1_51919	1162	No	NA	1	0	0	Not-determined	Genome-fragment	NA	NA	0	1	no viral genes detected
s18v1_52027	1320	No	NA	1	0	1	Not-determined	Genome-fragment	NA	NA	0	1	no viral genes detected
s18v1_52042	1110	No	NA	2	0	1	Not-determined	Genome-fragment	NA	NA	0	1	no viral genes detected
s18v1_52090	3692	No	NA	7	0	0	Low-quality	Genome-fragment	4.64	AAI-based (high-confidence)	0	1	no viral genes detected
s18v1_52145	1011	No	NA	1	0	0	Not-determined	Genome-fragment	NA	NA	0	1	no viral genes detected
s18v1_52162	2564	No	NA	2	0	0	Low-quality	Genome-fragment	3.34	AAI-based (medium-confidence)	0	1	no viral genes detected
s18v1_52221	1068	No	NA	1	0	1	Not-determined	Genome-fragment	NA	NA	0	1	no viral genes detected
s18v1_52303	5444	No	NA	6	0	3	Not-determined	Genome-fragment	NA	NA	0	1	no viral genes detected
s18v1_52324	1029	No	NA	1	0	0	Low-quality	Genome-fragment	1.82	AAI-based (high-confidence)	0	1	no viral genes detected
s18v1_52442	1578	No	NA	5	0	5	Not-determined	Genome-fragment	NA	NA	0	1	no viral genes detected
s18v1_52520	1172	No	NA	2	0	0	Not-determined	Genome-fragment	NA	NA	0	1	no viral genes detected
s18v1_52665	1173	No	NA	1	0	1	Not-determined	Genome-fragment	NA	NA	0	1	no viral genes detected
s18v1_52783	1500	No	NA	4	0	0	Not-determined	Genome-fragment	NA	NA	0	1	no viral genes detected
s18v1_52886	1643	No	NA	2	0	2	Not-determined	Genome-fragment	NA	NA	0	1	no viral genes detected
s18v1_52961	2034	No	NA	1	0	0	Not-determined	Genome-fragment	NA	NA	0	1	no viral genes detected
s18v1_52966	1132	No	NA	1	0	1	Not-determined	Genome-fragment	NA	NA	0	1	no viral genes detected
s18v1_53056	1289	No	NA	2	0	2	Not-determined	Genome-fragment	NA	NA	0	1	no viral genes detected
s18v1_53060	4531	No	NA	6	0	0	Not-determined	Genome-fragment	NA	NA	0	1	no viral genes detected
s18v1_53141	1343	No	NA	1	0	1	Not-determined	Genome-fragment	NA	NA	0	1	no viral genes detected
s18v1_53325	1892	No	NA	3	2	0	Low-quality	Genome-fragment	2.35	AAI-based (high-confidence)	0	1
s18v1_53391	2582	No	NA	4	0	4	Not-determined	Genome-fragment	NA	NA	0	1	no viral genes detected
s18v1_53451	1017	No	NA	2	0	2	Not-determined	Genome-fragment	NA	NA	0	1	no viral genes detected
s18v1_53460	1169	No	NA	2	0	1	Not-determined	Genome-fragment	NA	NA	0	1	no viral genes detected
s18v1_53594	1458	No	NA	1	0	0	Not-determined	Genome-fragment	NA	NA	0	1	no viral genes detected
s18v1_53735	3252	No	NA	11	0	0	Low-quality	Genome-fragment	5.36	AAI-based (high-confidence)	0	1	no viral genes detected
s18v1_53829	5157	No	NA	3	0	2	Low-quality	Genome-fragment	8.65	AAI-based (medium-confidence)	0	1	no viral genes detected
s18v1_53945	4575	No	NA	5	0	5	Not-determined	Genome-fragment	NA	NA	0	1	no viral genes detected
s18v1_53976	1995	No	NA	2	0	0	Low-quality	Genome-fragment	4.1	AAI-based (high-confidence)	0	1	no viral genes detected
s18v1_54067	2397	No	NA	2	2	0	Low-quality	Genome-fragment	7.91	HMM-based (lower-bound)	0	1
s18v1_54089	2085	No	NA	4	0	4	Low-quality	Genome-fragment	1.19	AAI-based (medium-confidence)	0	1	no viral genes detected
s18v1_54379	1335	No	NA	5	1	0	Low-quality	Genome-fragment	1.31	AAI-based (high-confidence)	0	1
s18v1_54380	3435	No	NA	2	0	2	Not-determined	Genome-fragment	NA	NA	0	1	no viral genes detected
s18v1_54525	3899	Yes	2694	3	1	1	Low-quality	Genome-fragment	3.35	HMM-based (lower-bound)	30.91	1
s18v1_54535	2476	No	NA	4	0	4	Low-quality	Genome-fragment	1.91	AAI-based (high-confidence)	0	1	no viral genes detected
s18v1_54644	1551	No	NA	2	0	2	Not-determined	Genome-fragment	NA	NA	0	1	no viral genes detected
s18v1_54661	1146	No	NA	4	0	0	Low-quality	Genome-fragment	3.48	AAI-based (high-confidence)	0	1	no viral genes detected
s18v1_54700	1015	No	NA	1	0	1	Not-determined	Genome-fragment	NA	NA	0	1	no viral genes detected
s18v1_54726	1393	No	NA	2	0	2	Not-determined	Genome-fragment	NA	NA	0	1	no viral genes detected
s18v1_54752	1005	No	NA	2	0	2	Not-determined	Genome-fragment	NA	NA	0	1	no viral genes detected
s18v1_54757	1000	No	NA	2	0	1	Not-determined	Genome-fragment	NA	NA	0	1	no viral genes detected
s18v1_54763	1240	No	NA	2	0	0	Not-determined	Genome-fragment	NA	NA	0	1	no viral genes detected
s18v1_54804	1105	No	NA	4	0	3	Not-determined	Genome-fragment	NA	NA	0	1	no viral genes detected
s18v1_54991	1453	No	NA	3	0	0	Not-determined	Genome-fragment	NA	NA	0	1	no viral genes detected
s18v1_55110	1846	No	NA	2	0	0	Low-quality	Genome-fragment	2.21	AAI-based (medium-confidence)	0	1	no viral genes detected
s18v1_55175	1775	No	NA	4	0	3	Not-determined	Genome-fragment	NA	NA	0	1	no viral genes detected
s18v1_55350	4027	No	NA	3	0	2	Low-quality	Genome-fragment	1.68	AAI-based (medium-confidence)	0	1	no viral genes detected
s18v1_55376	1056	No	NA	1	0	1	Not-determined	Genome-fragment	NA	NA	0	1	no viral genes detected
s18v1_55388	1500	No	NA	2	0	1	Not-determined	Genome-fragment	NA	NA	0	1	no viral genes detected
s18v1_55543	1510	No	NA	2	0	1	Low-quality	Genome-fragment	0.9	AAI-based (high-confidence)	0	1	no viral genes detected
s18v1_55724	1096	No	NA	1	0	1	Not-determined	Genome-fragment	NA	NA	0	1	no viral genes detected
s18v1_55730	3473	No	NA	2	0	2	Not-determined	Genome-fragment	NA	NA	0	1	no viral genes detected
s18v1_55733	1589	No	NA	2	0	1	Not-determined	Genome-fragment	NA	NA	0	1	no viral genes detected
s18v1_55740	1182	No	NA	1	0	1	Not-determined	Genome-fragment	NA	NA	0	1	no viral genes detected
s18v1_55753	4613	No	NA	3	1	0	Low-quality	Genome-fragment	2.13	HMM-based (lower-bound)	0	1
s18v1_55765	1468	No	NA	1	0	0	Not-determined	Genome-fragment	NA	NA	0	1	no viral genes detected
s18v1_55825	3128	No	NA	3	0	0	Low-quality	Genome-fragment	6.57	AAI-based (medium-confidence)	0	1	no viral genes detected
s18v1_55870	1106	No	NA	2	0	0	Not-determined	Genome-fragment	NA	NA	0	1	no viral genes detected
s18v1_55885	4703	No	NA	4	0	4	Not-determined	Genome-fragment	NA	NA	0	1	no viral genes detected
s18v1_55904	6026	No	NA	5	0	1	Not-determined	Genome-fragment	NA	NA	0	1	no viral genes detected
s18v1_55915	4751	No	NA	5	0	3	Not-determined	Genome-fragment	NA	NA	0	1	no viral genes detected
s18v1_55965	6787	No	NA	9	0	3	Not-determined	Genome-fragment	NA	NA	0	1	no viral genes detected
s18v1_55969	10646	No	NA	14	3	1	Low-quality	Genome-fragment	22.07	AAI-based (high-confidence)	0	1
s18v1_56144	1546	No	NA	4	0	4	Low-quality	Genome-fragment	4.04	AAI-based (high-confidence)	0	1	no viral genes detected
s18v1_56179	1301	No	NA	2	0	1	Not-determined	Genome-fragment	NA	NA	0	1	no viral genes detected
s18v1_56252	2093	No	NA	3	0	2	Not-determined	Genome-fragment	NA	NA	0	1	no viral genes detected
s18v1_56348	2031	No	NA	2	0	2	Not-determined	Genome-fragment	NA	NA	0	1	no viral genes detected
s18v1_56504	1333	No	NA	2	0	2	Low-quality	Genome-fragment	2.73	AAI-based (high-confidence)	0	1	no viral genes detected
s18v1_56512	1176	No	NA	2	2	0	Low-quality	Genome-fragment	4.14	HMM-based (lower-bound)	0	1
s18v1_56529	1990	No	NA	1	0	1	Not-determined	Genome-fragment	NA	NA	0	1	no viral genes detected
s18v1_56701	1769	No	NA	1	0	1	Not-determined	Genome-fragment	NA	NA	0	1	no viral genes detected
s18v1_56755	1671	No	NA	1	0	1	Not-determined	Genome-fragment	NA	NA	0	1	no viral genes detected
s18v1_56773	1533	No	NA	2	0	2	Not-determined	Genome-fragment	NA	NA	0	1	no viral genes detected
s18v1_56915	3173	No	NA	4	0	3	Not-determined	Genome-fragment	NA	NA	0	1	no viral genes detected
s18v1_56986	1025	No	NA	2	0	1	Not-determined	Genome-fragment	NA	NA	0	1	no viral genes detected
s18v1_57017	1045	No	NA	1	0	0	Not-determined	Genome-fragment	NA	NA	0	1	no viral genes detected
s18v1_57058	1290	No	NA	1	0	1	Not-determined	Genome-fragment	NA	NA	0	1	no viral genes detected
s18v1_57113	1351	No	NA	1	0	0	Not-determined	Genome-fragment	NA	NA	0	1	no viral genes detected
s18v1_57127	1343	No	NA	2	0	0	Not-determined	Genome-fragment	NA	NA	0	1	no viral genes detected
s18v1_57210	1053	No	NA	2	0	1	Not-determined	Genome-fragment	NA	NA	0	1	no viral genes detected
s18v1_57425	1415	No	NA	1	0	0	Not-determined	Genome-fragment	NA	NA	0	1	no viral genes detected
s18v1_57622	77538	No	NA	131	17	2	High-quality	High-quality	98.19	AAI-based (high-confidence)	0	1
s18v1_57756	1418	No	NA	3	0	0	Not-determined	Genome-fragment	NA	NA	0	1	no viral genes detected
s18v1_57925	3773	No	NA	3	0	2	Not-determined	Genome-fragment	NA	NA	0	1	no viral genes detected
s18v1_57966	1333	No	NA	3	0	2	Low-quality	Genome-fragment	0.58	AAI-based (medium-confidence)	0	1	no viral genes detected
s18v1_57997	1304	No	NA	1	0	1	Not-determined	Genome-fragment	NA	NA	0	1	no viral genes detected
s18v1_58106	63218	No	NA	105	26	0	High-quality	High-quality	100	AAI-based (high-confidence)	0	1
s18v1_58113	5123	No	NA	7	0	1	Low-quality	Genome-fragment	5.26	AAI-based (medium-confidence)	0	1	no viral genes detected
s18v1_58229	4504	No	NA	4	0	0	Not-determined	Genome-fragment	NA	NA	0	1	no viral genes detected
s18v1_58329	1997	No	NA	2	0	1	Not-determined	Genome-fragment	NA	NA	0	1	no viral genes detected
s18v1_58455	1267	No	NA	3	0	0	Low-quality	Genome-fragment	2.87	AAI-based (high-confidence)	0	1	no viral genes detected
s18v1_58587	1148	No	NA	3	0	0	Low-quality	Genome-fragment	2.57	AAI-based (high-confidence)	0	1	no viral genes detected
s18v1_58595	6760	No	NA	7	4	0	Low-quality	Genome-fragment	12.49	AAI-based (high-confidence)	0	1
s18v1_58681	1369	No	NA	2	0	0	Not-determined	Genome-fragment	NA	NA	0	1	no viral genes detected
s18v1_58711	1090	No	NA	1	0	1	Not-determined	Genome-fragment	NA	NA	0	1	no viral genes detected
s18v1_58737	1133	No	NA	1	0	1	Not-determined	Genome-fragment	NA	NA	0	1	no viral genes detected
s18v1_58942	2029	No	NA	3	0	0	Low-quality	Genome-fragment	2.88	AAI-based (medium-confidence)	0	1	no viral genes detected
s18v1_59110	2421	No	NA	5	0	0	Not-determined	Genome-fragment	NA	NA	0	1	no viral genes detected
s18v1_59312	4236	No	NA	2	0	2	Not-determined	Genome-fragment	NA	NA	0	1	no viral genes detected
s18v1_59314	1065	No	NA	2	0	0	Not-determined	Genome-fragment	NA	NA	0	1	no viral genes detected
s18v1_59374	1437	No	NA	4	0	0	Low-quality	Genome-fragment	1.27	AAI-based (high-confidence)	0	1	no viral genes detected
s18v1_59383	7843	No	NA	9	1	0	Low-quality	Genome-fragment	10.61	AAI-based (high-confidence)	0	1
s18v1_59413	2904	No	NA	6	0	4	Not-determined	Genome-fragment	NA	NA	0	1	no viral genes detected
s18v1_59537	1119	No	NA	2	0	2	Not-determined	Genome-fragment	NA	NA	0	1	no viral genes detected
s18v1_59615	1906	No	NA	2	0	0	Low-quality	Genome-fragment	0.88	AAI-based (high-confidence)	0	1	no viral genes detected
s18v1_59738	3842	No	NA	9	2	0	Low-quality	Genome-fragment	9.01	AAI-based (high-confidence)	0	1
s18v1_59748	1084	No	NA	2	0	0	Not-determined	Genome-fragment	NA	NA	0	1	no viral genes detected
s18v1_59915	1087	No	NA	2	0	2	Not-determined	Genome-fragment	NA	NA	0	1	no viral genes detected
s18v1_59930	1162	No	NA	1	0	0	Not-determined	Genome-fragment	NA	NA	0	1	no viral genes detected
s18v1_60155	1159	No	NA	2	0	1	Not-determined	Genome-fragment	NA	NA	0	1	no viral genes detected
s18v1_60162	8461	No	NA	15	5	0	Low-quality	Genome-fragment	22.1	AAI-based (high-confidence)	0	1
s18v1_60224	4005	No	NA	7	0	4	Not-determined	Genome-fragment	NA	NA	0	1	no viral genes detected
s18v1_60283	43997	No	NA	69	15	0	High-quality	High-quality	95.34	AAI-based (high-confidence)	0	1
s18v1_60318	2677	No	NA	3	0	2	Not-determined	Genome-fragment	NA	NA	0	1	no viral genes detected
s18v1_60337	1802	No	NA	2	0	0	Not-determined	Genome-fragment	NA	NA	0	1	no viral genes detected
s18v1_60354	1126	No	NA	1	0	1	Not-determined	Genome-fragment	NA	NA	0	1	no viral genes detected
s18v1_60356	2463	No	NA	1	0	1	Not-determined	Genome-fragment	NA	NA	0	1	no viral genes detected
s18v1_60377	3049	No	NA	3	0	0	Not-determined	Genome-fragment	NA	NA	0	1	no viral genes detected
s18v1_60457	1010	No	NA	3	0	1	Low-quality	Genome-fragment	0.6	AAI-based (medium-confidence)	0	1	no viral genes detected
s18v1_60466	54183	No	NA	96	20	1	Complete	High-quality	100	DTR (high-confidence)	0	1
s18v1_60536	2179	No	NA	5	0	0	Not-determined	Genome-fragment	NA	NA	0	1	no viral genes detected
s18v1_60609	1906	No	NA	1	0	1	Not-determined	Genome-fragment	NA	NA	0	1	no viral genes detected
s18v1_60668	1567	No	NA	2	0	0	Not-determined	Genome-fragment	NA	NA	0	1	no viral genes detected
s18v1_60677	1127	No	NA	1	0	1	Not-determined	Genome-fragment	NA	NA	0	1	no viral genes detected
s18v1_60778	1079	No	NA	2	0	0	Not-determined	Genome-fragment	NA	NA	0	1	no viral genes detected
s18v1_60784	4464	No	NA	5	0	2	Low-quality	Genome-fragment	8.36	AAI-based (medium-confidence)	0	1	no viral genes detected
s18v1_60813	1087	No	NA	2	1	0	Low-quality	Genome-fragment	1.3	HMM-based (lower-bound)	0	1
s18v1_60955	1451	No	NA	2	0	0	Not-determined	Genome-fragment	NA	NA	0	1	no viral genes detected
s18v1_61005	1670	No	NA	2	0	2	Not-determined	Genome-fragment	NA	NA	0	1	no viral genes detected
s18v1_61118	1495	No	NA	4	0	0	Not-determined	Genome-fragment	NA	NA	0	1	no viral genes detected
s18v1_61129	2126	No	NA	1	0	1	Not-determined	Genome-fragment	NA	NA	0	1	no viral genes detected
s18v1_61140	1249	No	NA	1	0	0	Not-determined	Genome-fragment	NA	NA	0	1	no viral genes detected
s18v1_61142	1421	No	NA	2	0	1	Not-determined	Genome-fragment	NA	NA	0	1	no viral genes detected
s18v1_61212	3866	No	NA	10	2	0	Low-quality	Genome-fragment	9.99	AAI-based (high-confidence)	0	1
s18v1_61274	1387	No	NA	2	0	1	Not-determined	Genome-fragment	NA	NA	0	1	no viral genes detected
s18v1_61349	1314	No	NA	1	0	1	Not-determined	Genome-fragment	NA	NA	0	1	no viral genes detected
s18v1_61368	1463	No	NA	2	0	1	Low-quality	Genome-fragment	2.45	AAI-based (medium-confidence)	0	1	no viral genes detected
s18v1_61371	2216	No	NA	1	0	1	Not-determined	Genome-fragment	NA	NA	0	1	no viral genes detected
s18v1_61421	3864	No	NA	5	0	3	Not-determined	Genome-fragment	NA	NA	0	1	no viral genes detected
s18v1_61455	1710	No	NA	2	0	1	Not-determined	Genome-fragment	NA	NA	0	1	no viral genes detected
s18v1_61572	1779	No	NA	3	0	3	Not-determined	Genome-fragment	NA	NA	0	1	no viral genes detected
s18v1_61600	7651	No	NA	5	1	0	Low-quality	Genome-fragment	4.53	AAI-based (high-confidence)	0	1
s18v1_61655	1070	No	NA	2	0	2	Not-determined	Genome-fragment	NA	NA	0	1	no viral genes detected
s18v1_61830	1719	No	NA	2	0	0	Not-determined	Genome-fragment	NA	NA	0	1	no viral genes detected
s18v1_61918	1372	No	NA	1	0	1	Not-determined	Genome-fragment	NA	NA	0	1	no viral genes detected
s18v1_61927	1381	No	NA	1	0	1	Not-determined	Genome-fragment	NA	NA	0	1	no viral genes detected
s18v1_61934	1141	No	NA	1	0	0	Not-determined	Genome-fragment	NA	NA	0	1	no viral genes detected
s18v1_61989	1370	No	NA	4	0	0	Not-determined	Genome-fragment	NA	NA	0	1	no viral genes detected
s18v1_62052	1130	No	NA	1	0	1	Not-determined	Genome-fragment	NA	NA	0	1	no viral genes detected
s18v1_62068	1009	No	NA	1	0	0	Not-determined	Genome-fragment	NA	NA	0	1	no viral genes detected
s18v1_62112	1310	No	NA	2	0	0	Low-quality	Genome-fragment	3.11	AAI-based (high-confidence)	0	1	no viral genes detected
s18v1_62205	1011	No	NA	1	0	1	Not-determined	Genome-fragment	NA	NA	0	1	no viral genes detected
s18v1_62210	1257	No	NA	1	0	1	Not-determined	Genome-fragment	NA	NA	0	1	no viral genes detected
s18v1_62413	1009	No	NA	1	0	0	Not-determined	Genome-fragment	NA	NA	0	1	no viral genes detected
s18v1_62415	1529	No	NA	2	0	2	Not-determined	Genome-fragment	NA	NA	0	1	no viral genes detected
s18v1_62467	1004	No	NA	2	0	1	Not-determined	Genome-fragment	NA	NA	0	1	no viral genes detected
s18v1_62483	1266	No	NA	1	0	1	Not-determined	Genome-fragment	NA	NA	0	1	no viral genes detected
s18v1_62703	1567	No	NA	5	0	4	Not-determined	Genome-fragment	NA	NA	0	1	no viral genes detected
s18v1_62721	1272	No	NA	2	0	1	Not-determined	Genome-fragment	NA	NA	0	1	no viral genes detected
s18v1_62748	1028	No	NA	1	0	0	Not-determined	Genome-fragment	NA	NA	0	1	no viral genes detected
s18v1_62838	1279	No	NA	3	0	0	Not-determined	Genome-fragment	NA	NA	0	1	no viral genes detected
s18v1_62856	53032	No	NA	63	13	1	Low-quality	Genome-fragment	48.79	AAI-based (high-confidence)	0	1
s18v1_62933	2173	No	NA	3	0	2	Not-determined	Genome-fragment	NA	NA	0	1	no viral genes detected
s18v1_62956	1110	No	NA	2	0	1	Not-determined	Genome-fragment	NA	NA	0	1	no viral genes detected
s18v1_63112	1114	No	NA	1	0	0	Not-determined	Genome-fragment	NA	NA	0	1	no viral genes detected
s18v1_63243	1259	No	NA	2	0	2	Not-determined	Genome-fragment	NA	NA	0	1	no viral genes detected
s18v1_63255	3365	No	NA	3	0	2	Low-quality	Genome-fragment	1.93	AAI-based (medium-confidence)	0	1	no viral genes detected
s18v1_63303	2590	No	NA	3	0	0	Not-determined	Genome-fragment	NA	NA	0	1	no viral genes detected
s18v1_63393	2238	No	NA	3	0	1	Not-determined	Genome-fragment	NA	NA	0	1	no viral genes detected
s18v1_63627	1279	No	NA	2	0	0	Low-quality	Genome-fragment	1.61	AAI-based (high-confidence)	0	1	no viral genes detected
s18v1_63862	1297	No	NA	1	0	0	Not-determined	Genome-fragment	NA	NA	0	1	no viral genes detected
s18v1_63876	1204	No	NA	1	0	0	Low-quality	Genome-fragment	3.14	AAI-based (high-confidence)	0	1	no viral genes detected
s18v1_63943	1146	No	NA	2	0	0	Low-quality	Genome-fragment	2.73	AAI-based (medium-confidence)	0	1	no viral genes detected
s18v1_63957	1080	No	NA	2	0	1	Not-determined	Genome-fragment	NA	NA	0	1	no viral genes detected
s18v1_64084	1366	No	NA	2	0	0	Not-determined	Genome-fragment	NA	NA	0	1	no viral genes detected
s18v1_64229	1224	No	NA	1	0	1	Not-determined	Genome-fragment	NA	NA	0	1	no viral genes detected
s18v1_64369	1096	No	NA	2	0	2	Not-determined	Genome-fragment	NA	NA	0	1	no viral genes detected
s18v1_64379	1567	No	NA	2	2	0	Low-quality	Genome-fragment	5.09	AAI-based (high-confidence)	0	1
s18v1_64438	1930	No	NA	2	0	2	Not-determined	Genome-fragment	NA	NA	0	1	no viral genes detected
s18v1_64477	3096	No	NA	3	0	1	Low-quality	Genome-fragment	2.25	AAI-based (medium-confidence)	0	1	no viral genes detected
s18v1_64508	1177	No	NA	3	0	3	Not-determined	Genome-fragment	NA	NA	0	1	no viral genes detected
s18v1_64519	3673	No	NA	3	0	1	Not-determined	Genome-fragment	NA	NA	0	1	no viral genes detected
s18v1_64561	1185	No	NA	1	0	1	Not-determined	Genome-fragment	NA	NA	0	1	no viral genes detected
s18v1_64597	11729	No	NA	14	0	1	Low-quality	Genome-fragment	40.66	AAI-based (medium-confidence)	0	1	no viral genes detected
s18v1_64764	14790	No	NA	19	4	0	Low-quality	Genome-fragment	13.56	AAI-based (high-confidence)	0	1
s18v1_64937	1951	No	NA	2	0	1	Not-determined	Genome-fragment	NA	NA	0	1	no viral genes detected
s18v1_65108	3488	No	NA	4	0	0	Low-quality	Genome-fragment	2.34	AAI-based (medium-confidence)	0	1	no viral genes detected
s18v1_65132	2677	No	NA	3	0	2	Not-determined	Genome-fragment	NA	NA	0	1	no viral genes detected
s18v1_65157	1133	No	NA	1	0	1	Not-determined	Genome-fragment	NA	NA	0	1	no viral genes detected
s18v1_65358	1455	No	NA	2	0	1	Not-determined	Genome-fragment	NA	NA	0	1	no viral genes detected
s18v1_65379	1245	No	NA	1	0	1	Not-determined	Genome-fragment	NA	NA	0	1	no viral genes detected
s18v1_65493	1192	No	NA	2	0	1	Not-determined	Genome-fragment	NA	NA	0	1	no viral genes detected
s18v1_65562	1193	No	NA	4	0	0	Not-determined	Genome-fragment	NA	NA	0	1	no viral genes detected
s18v1_65583	1178	No	NA	1	0	1	Not-determined	Genome-fragment	NA	NA	0	1	no viral genes detected
s18v1_65661	1299	No	NA	4	0	0	Low-quality	Genome-fragment	3.55	AAI-based (high-confidence)	0	1	no viral genes detected
s18v1_65794	1285	No	NA	1	0	0	Not-determined	Genome-fragment	NA	NA	0	1	no viral genes detected
s18v1_65833	1194	No	NA	2	0	2	Not-determined	Genome-fragment	NA	NA	0	1	no viral genes detected
s18v1_65847	1163	No	NA	1	0	0	Not-determined	Genome-fragment	NA	NA	0	1	no viral genes detected
s18v1_66013	4582	No	NA	5	0	1	Not-determined	Genome-fragment	NA	NA	0	1	no viral genes detected
s18v1_66014	1327	No	NA	2	0	1	Not-determined	Genome-fragment	NA	NA	0	1	no viral genes detected
s18v1_66253	3768	No	NA	9	0	3	Not-determined	Genome-fragment	NA	NA	0	1	no viral genes detected
s18v1_66256	1126	No	NA	2	0	2	Not-determined	Genome-fragment	NA	NA	0	1	no viral genes detected
s18v1_66266	3501	No	NA	5	0	1	Not-determined	Genome-fragment	NA	NA	0	1	no viral genes detected
s18v1_66268	1162	No	NA	1	0	1	Not-determined	Genome-fragment	NA	NA	0	1	no viral genes detected
s18v1_66374	1287	No	NA	3	1	0	Low-quality	Genome-fragment	2.66	AAI-based (high-confidence)	0	1
s18v1_66462	1881	No	NA	3	0	2	Not-determined	Genome-fragment	NA	NA	0	1	no viral genes detected
s18v1_66514	1360	No	NA	2	0	0	Low-quality	Genome-fragment	3.57	AAI-based (high-confidence)	0	1	no viral genes detected
s18v1_66637	1073	No	NA	2	0	2	Not-determined	Genome-fragment	NA	NA	0	1	no viral genes detected
s18v1_66655	1285	No	NA	2	1	0	Low-quality	Genome-fragment	2.89	AAI-based (high-confidence)	0	1
s18v1_66750	3753	No	NA	3	0	3	Not-determined	Genome-fragment	NA	NA	0	1	no viral genes detected
s18v1_66860	1391	No	NA	2	0	0	Low-quality	Genome-fragment	3.48	AAI-based (high-confidence)	0	1	no viral genes detected
s18v1_66897	3331	No	NA	3	0	1	Not-determined	Genome-fragment	NA	NA	0	1	no viral genes detected
s18v1_66968	1691	No	NA	2	0	1	Not-determined	Genome-fragment	NA	NA	0	1	no viral genes detected
s18v1_66985	5260	No	NA	7	0	6	Not-determined	Genome-fragment	NA	NA	0	1	no viral genes detected
s18v1_66990	3545	No	NA	3	1	0	Low-quality	Genome-fragment	7.53	AAI-based (high-confidence)	0	1
s18v1_67251	1133	No	NA	2	0	0	Not-determined	Genome-fragment	NA	NA	0	1	no viral genes detected
s18v1_67344	2132	No	NA	1	0	0	Not-determined	Genome-fragment	NA	NA	0	1	no viral genes detected
s18v1_67356	1016	No	NA	2	0	0	Not-determined	Genome-fragment	NA	NA	0	1	no viral genes detected
s18v1_67451	16713	No	NA	19	7	0	High-quality	High-quality	100	AAI-based (high-confidence)	0	1
s18v1_67582	4150	No	NA	8	0	0	Low-quality	Genome-fragment	3.82	AAI-based (high-confidence)	0	1	no viral genes detected
s18v1_67798	2311	No	NA	3	0	2	Not-determined	Genome-fragment	NA	NA	0	1	no viral genes detected
s18v1_67904	2125	No	NA	1	0	0	Not-determined	Genome-fragment	NA	NA	0	1	no viral genes detected
s18v1_67996	2512	No	NA	2	0	0	Low-quality	Genome-fragment	1.72	AAI-based (medium-confidence)	0	1	no viral genes detected
s18v1_68000	1381	No	NA	2	0	1	Not-determined	Genome-fragment	NA	NA	0	1	no viral genes detected
s18v1_68009	1257	No	NA	1	0	1	Not-determined	Genome-fragment	NA	NA	0	1	no viral genes detected
s18v1_68406	1146	No	NA	2	2	0	Low-quality	Genome-fragment	2.37	AAI-based (high-confidence)	0	1
s18v1_68485	1536	No	NA	2	0	1	Not-determined	Genome-fragment	NA	NA	0	1	no viral genes detected
s18v1_68565	3011	No	NA	5	0	3	Not-determined	Genome-fragment	NA	NA	0	1	no viral genes detected
s18v1_68621	1182	No	NA	2	2	0	Low-quality	Genome-fragment	2.65	AAI-based (high-confidence)	0	1
s18v1_68649	2803	No	NA	1	0	1	Not-determined	Genome-fragment	NA	NA	0	1	no viral genes detected
s18v1_68835	1158	No	NA	2	2	0	Low-quality	Genome-fragment	2.62	AAI-based (high-confidence)	0	1
s18v1_68888	24969	No	NA	44	5	0	Low-quality	Genome-fragment	42.58	AAI-based (high-confidence)	0	1
s18v1_68942	1665	No	NA	3	0	0	Not-determined	Genome-fragment	NA	NA	0	1	no viral genes detected
s18v1_69148	3383	No	NA	5	0	3	Low-quality	Genome-fragment	1.92	AAI-based (medium-confidence)	0	1	no viral genes detected
s18v1_69356	1321	No	NA	2	0	1	Not-determined	Genome-fragment	NA	NA	0	1	no viral genes detected
s18v1_69455	1095	No	NA	2	0	1	Not-determined	Genome-fragment	NA	NA	0	1	no viral genes detected
s18v1_69520	3716	No	NA	5	0	0	Not-determined	Genome-fragment	NA	NA	0	1	no viral genes detected
s18v1_69609	1559	No	NA	2	0	1	Not-determined	Genome-fragment	NA	NA	0	1	no viral genes detected
s18v1_69744	2146	No	NA	2	0	2	Not-determined	Genome-fragment	NA	NA	0	1	no viral genes detected
s18v1_69794	1284	No	NA	1	0	1	Not-determined	Genome-fragment	NA	NA	0	1	no viral genes detected
s18v1_70619	2010	No	NA	4	0	1	Not-determined	Genome-fragment	NA	NA	0	1	no viral genes detected
s18v1_70642	1107	No	NA	3	0	1	Not-determined	Genome-fragment	NA	NA	0	1	no viral genes detected
s18v1_70771	4408	No	NA	11	1	0	Low-quality	Genome-fragment	2.74	AAI-based (high-confidence)	0	1
s18v1_70781	1096	No	NA	1	0	0	Not-determined	Genome-fragment	NA	NA	0	1	no viral genes detected
s18v1_70832	1650	No	NA	3	1	0	Low-quality	Genome-fragment	1.68	AAI-based (medium-confidence)	0	1
s18v1_70848	1041	No	NA	2	0	1	Not-determined	Genome-fragment	NA	NA	0	1	no viral genes detected
s18v1_70883	3263	No	NA	4	0	4	Not-determined	Genome-fragment	NA	NA	0	1	no viral genes detected
s18v1_70895	1106	No	NA	1	0	1	Not-determined	Genome-fragment	NA	NA	0	1	no viral genes detected
s18v1_70997	1134	No	NA	1	0	0	Not-determined	Genome-fragment	NA	NA	0	1	no viral genes detected
s18v1_71000	2000	No	NA	1	0	1	Not-determined	Genome-fragment	NA	NA	0	1	no viral genes detected
s18v1_71296	82216	No	NA	128	28	5	High-quality	High-quality	100	AAI-based (high-confidence)	0	1
s18v1_71354	8099	No	NA	8	0	6	Not-determined	Genome-fragment	NA	NA	0	1	no viral genes detected
s18v1_71623	1588	No	NA	2	2	0	Low-quality	Genome-fragment	2.91	AAI-based (high-confidence)	0	1
s18v1_71642	1394	No	NA	2	0	2	Not-determined	Genome-fragment	NA	NA	0	1	no viral genes detected
s18v1_71787	1077	No	NA	2	0	1	Not-determined	Genome-fragment	NA	NA	0	1	no viral genes detected
s18v1_71936	1143	No	NA	3	0	0	Not-determined	Genome-fragment	NA	NA	0	1	no viral genes detected
s18v1_71957	46120	No	NA	45	4	1	High-quality	High-quality	100	AAI-based (high-confidence)	0	1
s18v1_72076	1292	No	NA	1	0	1	Not-determined	Genome-fragment	NA	NA	0	1	no viral genes detected
s18v1_72328	1117	No	NA	3	0	2	Not-determined	Genome-fragment	NA	NA	0	1	no viral genes detected
s18v1_72366	1033	No	NA	2	0	2	Not-determined	Genome-fragment	NA	NA	0	1	no viral genes detected
s18v1_72379	2029	No	NA	5	0	2	Not-determined	Genome-fragment	NA	NA	0	1	no viral genes detected
s18v1_72412	1362	No	NA	1	0	0	Not-determined	Genome-fragment	NA	NA	0	1	no viral genes detected
s18v1_72458	2010	No	NA	2	0	1	Not-determined	Genome-fragment	NA	NA	0	1	no viral genes detected
s18v1_72471	1025	No	NA	2	0	1	Not-determined	Genome-fragment	NA	NA	0	1	no viral genes detected
s18v1_72492	2691	No	NA	3	1	0	Low-quality	Genome-fragment	6.63	AAI-based (high-confidence)	0	1
s18v1_72497	1197	No	NA	1	0	0	Not-determined	Genome-fragment	NA	NA	0	1	no viral genes detected
s18v1_72514	1160	No	NA	2	0	0	Low-quality	Genome-fragment	1.73	AAI-based (high-confidence)	0	1	no viral genes detected
s18v1_72642	1062	No	NA	1	0	0	Not-determined	Genome-fragment	NA	NA	0	1	no viral genes detected
s18v1_72707	1240	No	NA	2	0	1	Not-determined	Genome-fragment	NA	NA	0	1	no viral genes detected
s18v1_72713	7232	No	NA	18	0	17	Not-determined	Genome-fragment	NA	NA	0	1	no viral genes detected
s18v1_72772	1131	No	NA	2	0	1	Not-determined	Genome-fragment	NA	NA	0	1	no viral genes detected
s18v1_72869	1258	No	NA	4	0	2	Not-determined	Genome-fragment	NA	NA	0	1	no viral genes detected
s18v1_72944	1029	No	NA	1	0	0	Not-determined	Genome-fragment	NA	NA	0	1	no viral genes detected
s18v1_73099	45919	No	NA	72	16	1	Complete	High-quality	100	DTR (high-confidence)	0	1
s18v1_73150	1078	No	NA	2	0	0	Not-determined	Genome-fragment	NA	NA	0	1	no viral genes detected
s18v1_73163	97817	No	NA	117	14	3	Complete	High-quality	100	DTR (high-confidence)	0	1
s18v1_73164	39182	No	NA	68	31	0	Medium-quality	Genome-fragment	58.61	HMM-based (lower-bound)	0	1	low-confidence DTR
s18v1_73168	32967	No	NA	52	16	1	Complete	High-quality	100	DTR (high-confidence)	0	1
s18v1_73172	63313	No	NA	64	5	0	Complete	High-quality	100	DTR (high-confidence)	0	1
s18v1_73174	36966	No	NA	53	23	1	Complete	High-quality	100	DTR (high-confidence)	0	1
s18v1_73176	81999	No	NA	109	14	1	Complete	High-quality	100	DTR (high-confidence)	0	1
s18v1_73178	78898	No	NA	107	14	1	Complete	High-quality	100	DTR (high-confidence)	0	1
s18v1_73179	47040	No	NA	65	18	0	Complete	High-quality	100	DTR (high-confidence)	0	1
s18v1-PF_66	1454	No	NA	2	0	1	Not-determined	Genome-fragment	NA	NA	0	1	no viral genes detected
s18v1-PF_190	1017	No	NA	1	0	1	Not-determined	Genome-fragment	NA	NA	0	1	no viral genes detected
s18v1-PF_261	1778	No	NA	2	0	2	Not-determined	Genome-fragment	NA	NA	0	1	no viral genes detected
s18v1-PF_301	1043	No	NA	1	0	0	Not-determined	Genome-fragment	NA	NA	0	1	no viral genes detected
s18v1-PF_367	1572	No	NA	2	0	2	Not-determined	Genome-fragment	NA	NA	0	1	no viral genes detected
s18v1-PF_422	1115	No	NA	2	0	2	Not-determined	Genome-fragment	NA	NA	0	1	no viral genes detected
s18v1-PF_429	1378	No	NA	1	0	0	Not-determined	Genome-fragment	NA	NA	0	1	no viral genes detected
s18v1-PF_591	3695	No	NA	16	0	0	Not-determined	Genome-fragment	NA	NA	0	1	no viral genes detected; low-confidence DTR
s18v1-PF_692	5261	No	NA	8	1	0	Low-quality	Genome-fragment	2.74	HMM-based (lower-bound)	0	1
s18v1-PF_825	1295	No	NA	2	0	2	Not-determined	Genome-fragment	NA	NA	0	1	no viral genes detected
s18v1-PF_1021	1319	No	NA	1	0	0	Not-determined	Genome-fragment	NA	NA	0	1	no viral genes detected
s18v1-PF_1070	1423	No	NA	1	0	0	Not-determined	Genome-fragment	NA	NA	0	1	no viral genes detected
s18v1-PF_1212	1454	No	NA	1	0	0	Not-determined	Genome-fragment	NA	NA	0	1	no viral genes detected
s18v1-PF_1223	1802	No	NA	2	0	2	Not-determined	Genome-fragment	NA	NA	0	1	no viral genes detected
s18v1-PF_1261	1280	No	NA	2	0	1	Not-determined	Genome-fragment	NA	NA	0	1	no viral genes detected
s18v1-PF_1432	5540	No	NA	6	0	5	Not-determined	Genome-fragment	NA	NA	0	1	no viral genes detected
s18v1-PF_1472	1389	No	NA	2	0	1	Not-determined	Genome-fragment	NA	NA	0	1	no viral genes detected
s18v1-PF_1569	2250	No	NA	3	0	0	Low-quality	Genome-fragment	4.49	AAI-based (high-confidence)	0	1	no viral genes detected
s18v1-PF_1630	1589	No	NA	2	0	0	Not-determined	Genome-fragment	NA	NA	0	1	no viral genes detected
s18v1-PF_1687	18713	No	NA	5	0	2	Low-quality	Genome-fragment	18.71	AAI-based (high-confidence)	0	1	no viral genes detected
s18v1-PF_1736	1091	No	NA	2	0	0	Low-quality	Genome-fragment	2.28	AAI-based (medium-confidence)	0	1	no viral genes detected
s18v1-PF_1791	28130	No	NA	33	0	8	Not-determined	Genome-fragment	NA	NA	0	1	no viral genes detected
s18v1-PF_1843	1071	No	NA	1	0	0	Not-determined	Genome-fragment	NA	NA	0	1	no viral genes detected
s18v1-PF_1845	1280	No	NA	1	0	1	Not-determined	Genome-fragment	NA	NA	0	1	no viral genes detected
s18v1-PF_1861	1147	No	NA	1	0	0	Not-determined	Genome-fragment	NA	NA	0	1	no viral genes detected
s18v1-PF_1908	2341	No	NA	3	0	1	Not-determined	Genome-fragment	NA	NA	0	1	no viral genes detected
s18v1-PF_2095	1023	No	NA	2	0	1	Not-determined	Genome-fragment	NA	NA	0	1	no viral genes detected
s18v1-PF_2229	1879	No	NA	3	0	0	Low-quality	Genome-fragment	3.95	AAI-based (medium-confidence)	0	1	no viral genes detected
s18v1-PF_2298	3597	No	NA	2	0	2	Not-determined	Genome-fragment	NA	NA	0	1	no viral genes detected
s18v1-PF_2299	1441	No	NA	4	1	0	Low-quality	Genome-fragment	2.33	AAI-based (high-confidence)	0	1
s18v1-PF_2354	44068	No	NA	69	15	0	High-quality	High-quality	95.49	AAI-based (high-confidence)	0	1
s18v1-PF_2427	1815	No	NA	1	0	1	Not-determined	Genome-fragment	NA	NA	0	1	no viral genes detected
s18v1-PF_2527	1500	No	NA	2	0	1	Low-quality	Genome-fragment	0.81	AAI-based (medium-confidence)	0	1	no viral genes detected
s18v1-PF_2591	2651	No	NA	7	0	0	Low-quality	Genome-fragment	4.37	AAI-based (high-confidence)	0	1	no viral genes detected
s18v1-PF_2666	1989	No	NA	2	0	0	Not-determined	Genome-fragment	NA	NA	0	1	no viral genes detected
s18v1-PF_2709	1025	No	NA	2	0	1	Not-determined	Genome-fragment	NA	NA	0	1	no viral genes detected
s18v1-PF_2765	1323	No	NA	4	0	0	Not-determined	Genome-fragment	NA	NA	0	1	no viral genes detected
s18v1-PF_2772	1269	No	NA	2	0	0	Not-determined	Genome-fragment	NA	NA	0	1	no viral genes detected
s18v1-PF_2864	2696	No	NA	3	0	1	Low-quality	Genome-fragment	6.03	AAI-based (medium-confidence)	0	1	no viral genes detected
s18v1-PF_2937	1002	No	NA	1	0	1	Not-determined	Genome-fragment	NA	NA	0	1	no viral genes detected
s18v1-PF_2942	1120	No	NA	1	0	1	Not-determined	Genome-fragment	NA	NA	0	1	no viral genes detected
s18v1-PF_2955	1652	No	NA	3	0	1	Not-determined	Genome-fragment	NA	NA	0	1	no viral genes detected
s18v1-PF_2991	1093	No	NA	1	1	0	Low-quality	Genome-fragment	10.19	HMM-based (lower-bound)	0	1
s18v1-PF_3034	1482	No	NA	2	0	0	Not-determined	Genome-fragment	NA	NA	0	1	no viral genes detected
s18v1-PF_3193	1013	No	NA	2	0	2	Not-determined	Genome-fragment	NA	NA	0	1	no viral genes detected
s18v1-PF_3224	1029	No	NA	1	0	1	Not-determined	Genome-fragment	NA	NA	0	1	no viral genes detected
s18v1-PF_3225	1394	No	NA	1	0	1	Not-determined	Genome-fragment	NA	NA	0	1	no viral genes detected
s18v1-PF_3385	1242	No	NA	2	0	1	Not-determined	Genome-fragment	NA	NA	0	1	no viral genes detected
s18v1-PF_3668	1327	No	NA	3	0	0	Not-determined	Genome-fragment	NA	NA	0	1	no viral genes detected
s18v1-PF_3728	1118	No	NA	2	0	1	Not-determined	Genome-fragment	NA	NA	0	1	no viral genes detected
s18v1-PF_3746	1113	No	NA	3	0	0	Not-determined	Genome-fragment	NA	NA	0	1	no viral genes detected
s18v1-PF_3878	22499	No	NA	30	13	0	Medium-quality	Genome-fragment	59.29	AAI-based (high-confidence)	0	1
s18v1-PF_3964	21382	No	NA	34	0	33	Not-determined	Genome-fragment	NA	NA	0	1	no viral genes detected
s18v1-PF_3985	1315	No	NA	1	0	1	Not-determined	Genome-fragment	NA	NA	0	1	no viral genes detected
s18v1-PF_3996	2249	No	NA	2	0	1	Not-determined	Genome-fragment	NA	NA	0	1	no viral genes detected
s18v1-PF_4005	1025	No	NA	2	0	2	Not-determined	Genome-fragment	NA	NA	0	1	no viral genes detected
s18v1-PF_4011	1357	No	NA	1	0	1	Not-determined	Genome-fragment	NA	NA	0	1	no viral genes detected
s18v1-PF_4075	1159	No	NA	1	0	1	Not-determined	Genome-fragment	NA	NA	0	1	no viral genes detected
s18v1-PF_4465	1160	No	NA	4	0	2	Not-determined	Genome-fragment	NA	NA	0	1	no viral genes detected
s18v1-PF_4598	1837	No	NA	1	0	1	Not-determined	Genome-fragment	NA	NA	0	1	no viral genes detected
s18v1-PF_4637	1061	No	NA	2	0	2	Not-determined	Genome-fragment	NA	NA	0	1	no viral genes detected
s18v1-PF_4688	2267	No	NA	3	0	2	Not-determined	Genome-fragment	NA	NA	0	1	no viral genes detected
s18v1-PF_4696	3675	No	NA	2	0	1	Not-determined	Genome-fragment	NA	NA	0	1	no viral genes detected
s18v1-PF_4753	1827	No	NA	2	0	0	Low-quality	Genome-fragment	1.03	AAI-based (medium-confidence)	0	1	no viral genes detected
s18v1-PF_4764	1341	No	NA	2	0	0	Low-quality	Genome-fragment	0.64	AAI-based (medium-confidence)	0	1	no viral genes detected
s18v1-PF_4784	7907	No	NA	9	1	0	Low-quality	Genome-fragment	17.71	AAI-based (high-confidence)	0	1
s18v1-PF_5055	1091	No	NA	1	0	0	Not-determined	Genome-fragment	NA	NA	0	1	no viral genes detected
s18v1-PF_5082	9832	No	NA	6	0	4	Not-determined	Genome-fragment	NA	NA	0	1	no viral genes detected
s18v1-PF_5091	1168	No	NA	4	0	0	Low-quality	Genome-fragment	2.12	AAI-based (high-confidence)	0	1	no viral genes detected
s18v1-PF_5154	1004	No	NA	2	0	1	Not-determined	Genome-fragment	NA	NA	0	1	no viral genes detected
s18v1-PF_5333	3584	No	NA	6	0	5	Not-determined	Genome-fragment	NA	NA	0	1	no viral genes detected
s18v1-PF_5394	5538	No	NA	5	0	1	Low-quality	Genome-fragment	2.19	AAI-based (medium-confidence)	0	1	no viral genes detected
s18v1-PF_5425	1703	No	NA	2	0	2	Not-determined	Genome-fragment	NA	NA	0	1	no viral genes detected
s18v1-PF_5438	1220	No	NA	1	0	1	Low-quality	Genome-fragment	0.32	AAI-based (medium-confidence)	0	1	no viral genes detected
s18v1-PF_5712	1480	No	NA	2	0	1	Not-determined	Genome-fragment	NA	NA	0	1	no viral genes detected
s18v1-PF_5755	1031	No	NA	3	0	2	Not-determined	Genome-fragment	NA	NA	0	1	no viral genes detected
s18v1-PF_5769	1163	No	NA	1	0	0	Not-determined	Genome-fragment	NA	NA	0	1	no viral genes detected
s18v1-PF_5779	2237	No	NA	2	0	1	Not-determined	Genome-fragment	NA	NA	0	1	no viral genes detected
s18v1-PF_5815	3107	No	NA	5	0	2	Not-determined	Genome-fragment	NA	NA	0	1	no viral genes detected
s18v1-PF_6052	1017	No	NA	1	0	1	Not-determined	Genome-fragment	NA	NA	0	1	no viral genes detected
s18v1-PF_6058	15418	No	NA	18	18	0	Low-quality	Genome-fragment	41.19	AAI-based (high-confidence)	0	1
s18v1-PF_6343	1696	No	NA	1	0	1	Not-determined	Genome-fragment	NA	NA	0	1	no viral genes detected
s18v1-PF_6406	1576	No	NA	2	0	0	Not-determined	Genome-fragment	NA	NA	0	1	no viral genes detected
s18v1-PF_6458	6651	No	NA	11	3	0	Low-quality	Genome-fragment	14.51	AAI-based (high-confidence)	0	1
s18v1-PF_6590	52966	No	NA	83	23	1	High-quality	High-quality	94.43	AAI-based (high-confidence)	0	1
s18v1-PF_6635	2598	No	NA	3	0	2	Not-determined	Genome-fragment	NA	NA	0	1	no viral genes detected
s18v1-PF_6707	135400	No	NA	177	37	5	Complete	High-quality	100	DTR (high-confidence)	0	1
s18v1-PF_6732	1067	No	NA	2	0	1	Not-determined	Genome-fragment	NA	NA	0	1	no viral genes detected
s18v1-PF_6781	7843	No	NA	10	1	0	Low-quality	Genome-fragment	10.61	AAI-based (high-confidence)	0	1
s18v1-PF_6925	1034	No	NA	2	0	2	Not-determined	Genome-fragment	NA	NA	0	1	no viral genes detected
s18v1-PF_6950	2191	No	NA	3	0	2	Not-determined	Genome-fragment	NA	NA	0	1	no viral genes detected
s18v1-PF_6993	1818	No	NA	1	0	1	Not-determined	Genome-fragment	NA	NA	0	1	no viral genes detected
s18v1-PF_7035	1239	No	NA	2	0	2	Not-determined	Genome-fragment	NA	NA	0	1	no viral genes detected
s18v1-PF_7114	1612	No	NA	2	0	2	Not-determined	Genome-fragment	NA	NA	0	1	no viral genes detected
s18v1-PF_7277	3321	No	NA	4	0	4	Low-quality	Genome-fragment	2.44	AAI-based (medium-confidence)	0	1	no viral genes detected
s18v1-PF_7386	1180	No	NA	2	0	1	Not-determined	Genome-fragment	NA	NA	0	1	no viral genes detected
s18v1-PF_7447	1077	No	NA	1	0	1	Not-determined	Genome-fragment	NA	NA	0	1	no viral genes detected
s18v1-PF_7510	1076	No	NA	2	0	1	Not-determined	Genome-fragment	NA	NA	0	1	no viral genes detected
s18v1-PF_7515	1458	No	NA	1	0	1	Not-determined	Genome-fragment	NA	NA	0	1	no viral genes detected
s18v1-PF_7525	1446	No	NA	1	0	1	Not-determined	Genome-fragment	NA	NA	0	1	no viral genes detected
s18v1-PF_7713	1084	No	NA	1	0	1	Not-determined	Genome-fragment	NA	NA	0	1	no viral genes detected
s18v1-PF_7941	3474	No	NA	6	0	5	Not-determined	Genome-fragment	NA	NA	0	1	no viral genes detected
s18v1-PF_8038	1285	No	NA	2	0	0	Not-determined	Genome-fragment	NA	NA	0	1	no viral genes detected
s18v1-PF_8064	1048	No	NA	3	0	0	Not-determined	Genome-fragment	NA	NA	0	1	no viral genes detected
s18v1-PF_8122	1477	No	NA	2	0	2	Not-determined	Genome-fragment	NA	NA	0	1	no viral genes detected
s18v1-PF_8128	1721	No	NA	5	0	0	Not-determined	Genome-fragment	NA	NA	0	1	no viral genes detected
s18v1-PF_8182	1566	No	NA	3	0	2	Not-determined	Genome-fragment	NA	NA	0	1	no viral genes detected
s18v1-PF_8330	1201	No	NA	1	0	1	Not-determined	Genome-fragment	NA	NA	0	1	no viral genes detected
s18v1-PF_8360	1045	No	NA	1	0	1	Not-determined	Genome-fragment	NA	NA	0	1	no viral genes detected
s18v1-PF_8416	3825	No	NA	2	0	0	Not-determined	Genome-fragment	NA	NA	0	1	no viral genes detected
s18v1-PF_8505	1192	No	NA	2	0	0	Not-determined	Genome-fragment	NA	NA	0	1	no viral genes detected
s18v1-PF_8507	1161	No	NA	2	0	1	Not-determined	Genome-fragment	NA	NA	0	1	no viral genes detected
s18v1-PF_8774	1127	No	NA	1	0	0	Not-determined	Genome-fragment	NA	NA	0	1	no viral genes detected
s18v1-PF_8845	1500	No	NA	2	0	1	Not-determined	Genome-fragment	NA	NA	0	1	no viral genes detected
s18v1-PF_8963	1113	No	NA	2	0	1	Not-determined	Genome-fragment	NA	NA	0	1	no viral genes detected
s18v1-PF_9036	1092	No	NA	2	0	1	Not-determined	Genome-fragment	NA	NA	0	1	no viral genes detected
s18v1-PF_9114	1529	No	NA	1	0	1	Not-determined	Genome-fragment	NA	NA	0	1	no viral genes detected
s18v1-PF_9115	1192	No	NA	1	0	1	Not-determined	Genome-fragment	NA	NA	0	1	no viral genes detected
s18v1-PF_9169	6210	No	NA	9	3	0	Low-quality	Genome-fragment	12.91	AAI-based (high-confidence)	0	1
s18v1-PF_9278	1165	No	NA	3	0	1	Not-determined	Genome-fragment	NA	NA	0	1	no viral genes detected
s18v1-PF_9357	3457	No	NA	3	0	3	Not-determined	Genome-fragment	NA	NA	0	1	no viral genes detected
s18v1-PF_9358	1551	No	NA	1	0	0	Not-determined	Genome-fragment	NA	NA	0	1	no viral genes detected
s18v1-PF_9409	1172	No	NA	1	0	1	Not-determined	Genome-fragment	NA	NA	0	1	no viral genes detected
s18v1-PF_9796	2322	No	NA	1	0	1	Not-determined	Genome-fragment	NA	NA	0	1	no viral genes detected
s18v1-PF_9945	3055	No	NA	3	0	3	Not-determined	Genome-fragment	NA	NA	0	1	no viral genes detected
s18v1-PF_9999	1159	No	NA	1	0	1	Not-determined	Genome-fragment	NA	NA	0	1	no viral genes detected
s18v1-PF_10051	1146	No	NA	1	0	1	Not-determined	Genome-fragment	NA	NA	0	1	no viral genes detected
s18v1-PF_10067	82025	No	NA	129	28	5	Complete	High-quality	100	DTR (high-confidence)	0	1
s18v1-PF_10103	1145	No	NA	2	0	1	Not-determined	Genome-fragment	NA	NA	0	1	no viral genes detected
s18v1-PF_10155	1860	No	NA	2	0	0	Not-determined	Genome-fragment	NA	NA	0	1	no viral genes detected
s18v1-PF_10271	1176	No	NA	1	0	0	Low-quality	Genome-fragment	1.29	AAI-based (high-confidence)	0	1	no viral genes detected
s18v1-PF_10284	1014	No	NA	2	0	2	Not-determined	Genome-fragment	NA	NA	0	1	no viral genes detected
s18v1-PF_10287	1707	No	NA	2	0	2	Not-determined	Genome-fragment	NA	NA	0	1	no viral genes detected
s18v1-PF_10373	2403	No	NA	1	0	0	Not-determined	Genome-fragment	NA	NA	0	1	no viral genes detected
s18v1-PF_10379	1160	No	NA	1	0	1	Not-determined	Genome-fragment	NA	NA	0	1	no viral genes detected
s18v1-PF_10535	14088	No	NA	27	0	0	Low-quality	Genome-fragment	33.26	AAI-based (high-confidence)	0	1	no viral genes detected
s18v1-PF_10559	1800	No	NA	2	0	1	Not-determined	Genome-fragment	NA	NA	0	1	no viral genes detected
s18v1-PF_10652	1388	No	NA	2	0	1	Not-determined	Genome-fragment	NA	NA	0	1	no viral genes detected
s18v1-PF_10778	1506	No	NA	2	0	1	Not-determined	Genome-fragment	NA	NA	0	1	no viral genes detected
s18v1-PF_10850	1110	No	NA	1	0	1	Not-determined	Genome-fragment	NA	NA	0	1	no viral genes detected
s18v1-PF_10967	1299	No	NA	2	0	1	Not-determined	Genome-fragment	NA	NA	0	1	no viral genes detected
s18v1-PF_10976	3896	No	NA	5	0	3	Not-determined	Genome-fragment	NA	NA	0	1	no viral genes detected
s18v1-PF_10983	1012	No	NA	1	0	0	Not-determined	Genome-fragment	NA	NA	0	1	no viral genes detected
s18v1-PF_11090	1480	No	NA	3	0	2	Not-determined	Genome-fragment	NA	NA	0	1	no viral genes detected
s18v1-PF_11092	7627	Yes	2757	8	1	2	Low-quality	Genome-fragment	5.72	AAI-based (high-confidence)	63.85	1
s18v1-PF_11096	1749	No	NA	2	0	1	Not-determined	Genome-fragment	NA	NA	0	1	no viral genes detected
s18v1-PF_11155	1274	No	NA	2	0	1	Not-determined	Genome-fragment	NA	NA	0	1	no viral genes detected
s18v1-PF_11178	1409	No	NA	2	0	1	Not-determined	Genome-fragment	NA	NA	0	1	no viral genes detected
s18v1-PF_11264	1092	No	NA	1	0	0	Not-determined	Genome-fragment	NA	NA	0	1	no viral genes detected
s18v1-PF_11364	1099	No	NA	3	0	1	Low-quality	Genome-fragment	2.75	AAI-based (high-confidence)	0	1	no viral genes detected
s18v1-PF_11367	1931	No	NA	4	0	1	Not-determined	Genome-fragment	NA	NA	0	1	no viral genes detected
s18v1-PF_11588	1862	No	NA	2	0	1	Not-determined	Genome-fragment	NA	NA	0	1	no viral genes detected
s18v1-PF_11647	3663	No	NA	5	0	2	Not-determined	Genome-fragment	NA	NA	0	1	no viral genes detected
s18v1-PF_11701	1049	No	NA	3	0	1	Not-determined	Genome-fragment	NA	NA	0	1	no viral genes detected
s18v1-PF_11707	21632	No	NA	21	0	4	Not-determined	Genome-fragment	NA	NA	0	1	no viral genes detected
s18v1-PF_11733	4090	No	NA	12	2	0	Low-quality	Genome-fragment	5.08	AAI-based (high-confidence)	0	1
s18v1-PF_11758	5296	No	NA	8	1	0	Low-quality	Genome-fragment	4.67	HMM-based (lower-bound)	0	1
s18v1-PF_11785	34770	No	NA	58	16	0	High-quality	High-quality	97.44	AAI-based (medium-confidence)	0	1
s18v1-PF_11865	1478	No	NA	1	0	0	Not-determined	Genome-fragment	NA	NA	0	1.1	no viral genes detected; low-confidence DTR
s18v1-PF_11871	1064	No	NA	2	0	2	Not-determined	Genome-fragment	NA	NA	0	1	no viral genes detected
s18v1-PF_11941	1660	No	NA	1	0	0	Not-determined	Genome-fragment	NA	NA	0	1	no viral genes detected
s18v1-PF_11989	1031	No	NA	1	0	1	Not-determined	Genome-fragment	NA	NA	0	1	no viral genes detected
s18v1-PF_12024	1223	No	NA	2	1	0	Low-quality	Genome-fragment	0.72	AAI-based (medium-confidence)	0	1
s18v1-PF_12147	1955	No	NA	1	0	1	Not-determined	Genome-fragment	NA	NA	0	1	no viral genes detected
s18v1-PF_12271	1131	No	NA	1	0	1	Not-determined	Genome-fragment	NA	NA	0	1	no viral genes detected
s18v1-PF_12324	1311	No	NA	2	0	1	Not-determined	Genome-fragment	NA	NA	0	1	no viral genes detected
s18v1-PF_12351	1560	No	NA	2	0	1	Low-quality	Genome-fragment	1.91	AAI-based (medium-confidence)	0	1	no viral genes detected
s18v1-PF_12405	1228	No	NA	2	0	0	Not-determined	Genome-fragment	NA	NA	0	1	no viral genes detected
s18v1-PF_12446	1370	No	NA	1	0	1	Not-determined	Genome-fragment	NA	NA	0	1	no viral genes detected
s18v1-PF_12678	3201	No	NA	4	0	2	Not-determined	Genome-fragment	NA	NA	0	1	no viral genes detected
s18v1-PF_12764	1299	No	NA	2	0	0	Low-quality	Genome-fragment	1.57	AAI-based (high-confidence)	0	1	no viral genes detected
s18v1-PF_12934	36625	No	NA	45	11	1	Complete	High-quality	100	DTR (high-confidence)	0	1
s18v1-PF_12959	1116	No	NA	1	0	1	Not-determined	Genome-fragment	NA	NA	0	1	no viral genes detected
s18v1-PF_13172	5838	No	NA	4	0	4	Low-quality	Genome-fragment	13.89	AAI-based (high-confidence)	0	1	no viral genes detected
s18v1-PF_13258	1148	No	NA	2	0	0	Not-determined	Genome-fragment	NA	NA	0	1	no viral genes detected
s18v1-PF_13295	1425	No	NA	3	1	0	Low-quality	Genome-fragment	2.9	AAI-based (high-confidence)	0	1
s18v1-PF_13340	5444	No	NA	4	0	3	Not-determined	Genome-fragment	NA	NA	0	1	no viral genes detected
s18v1-PF_13362	1395	No	NA	4	0	3	Not-determined	Genome-fragment	NA	NA	0	1	no viral genes detected
s18v1-PF_13424	1177	No	NA	1	0	0	Not-determined	Genome-fragment	NA	NA	0	1	no viral genes detected
s18v1-PF_13512	1066	No	NA	1	0	0	Not-determined	Genome-fragment	NA	NA	0	1	no viral genes detected
s18v1-PF_13554	1658	No	NA	1	0	1	Not-determined	Genome-fragment	NA	NA	0	1	no viral genes detected
s18v1-PF_13647	2067	No	NA	2	0	1	Not-determined	Genome-fragment	NA	NA	0	1	no viral genes detected
s18v1-PF_13686	3413	No	NA	2	0	1	Not-determined	Genome-fragment	NA	NA	0	1	no viral genes detected
s18v1-PF_13704	1686	No	NA	2	0	2	Not-determined	Genome-fragment	NA	NA	0	1	no viral genes detected
s18v1-PF_13727	1574	No	NA	3	0	0	Not-determined	Genome-fragment	NA	NA	0	1	no viral genes detected
s18v1-PF_13959	1963	No	NA	4	0	2	Not-determined	Genome-fragment	NA	NA	0	1	no viral genes detected
s18v1-PF_14204	1130	No	NA	2	0	0	Not-determined	Genome-fragment	NA	NA	0	1	no viral genes detected
s18v1-PF_14214	5307	No	NA	5	0	4	Low-quality	Genome-fragment	4.15	AAI-based (medium-confidence)	0	1	no viral genes detected
s18v1-PF_14996	2169	No	NA	3	0	0	Not-determined	Genome-fragment	NA	NA	0	1	no viral genes detected
s18v1-PF_15141	1544	No	NA	2	0	2	Not-determined	Genome-fragment	NA	NA	0	1	no viral genes detected
s18v1-PF_15303	1057	No	NA	1	0	1	Not-determined	Genome-fragment	NA	NA	0	1	no viral genes detected
s18v1-PF_15332	1428	No	NA	1	0	1	Not-determined	Genome-fragment	NA	NA	0	1	no viral genes detected
s18v1-PF_15377	1157	No	NA	1	0	1	Not-determined	Genome-fragment	NA	NA	0	1	no viral genes detected
s18v1-PF_15611	1243	No	NA	2	1	0	Low-quality	Genome-fragment	2.77	AAI-based (medium-confidence)	0	1
s18v1-PF_15620	1382	No	NA	2	0	1	Not-determined	Genome-fragment	NA	NA	0	1	no viral genes detected
s18v1-PF_15625	1005	No	NA	1	0	0	Not-determined	Genome-fragment	NA	NA	0	1	no viral genes detected
s18v1-PF_15669	12476	No	NA	16	0	3	Low-quality	Genome-fragment	24.01	AAI-based (medium-confidence)	0	1	no viral genes detected
s18v1-PF_15777	1111	No	NA	1	0	0	Not-determined	Genome-fragment	NA	NA	0	1	no viral genes detected
s18v1-PF_15909	1343	No	NA	2	0	1	Not-determined	Genome-fragment	NA	NA	0	1	no viral genes detected
s18v1-PF_15947	1112	No	NA	1	0	0	Not-determined	Genome-fragment	NA	NA	0	1	no viral genes detected
s18v1-PF_16043	1633	No	NA	3	0	1	Not-determined	Genome-fragment	NA	NA	0	1	no viral genes detected
s18v1-PF_16120	1519	No	NA	1	0	1	Not-determined	Genome-fragment	NA	NA	0	1	no viral genes detected
s18v1-PF_16257	5184	No	NA	10	2	0	Low-quality	Genome-fragment	7.77	AAI-based (high-confidence)	0	1
s18v1-PF_16350	1212	No	NA	1	0	1	Not-determined	Genome-fragment	NA	NA	0	1	no viral genes detected
s18v1-PF_16375	1406	No	NA	1	0	1	Not-determined	Genome-fragment	NA	NA	0	1	no viral genes detected
s18v1-PF_16412	1614	No	NA	1	0	0	Low-quality	Genome-fragment	1.63	AAI-based (high-confidence)	0	1	no viral genes detected
s18v1-PF_16620	1193	No	NA	1	0	0	Not-determined	Genome-fragment	NA	NA	0	1	no viral genes detected
s18v1-PF_16720	1208	No	NA	3	0	1	Not-determined	Genome-fragment	NA	NA	0	1	no viral genes detected
s18v1-PF_16911	1035	No	NA	1	0	1	Not-determined	Genome-fragment	NA	NA	0	1	no viral genes detected
s18v1-PF_17064	3050	No	NA	3	0	2	Not-determined	Genome-fragment	NA	NA	0	1	no viral genes detected
s18v1-PF_17075	1841	No	NA	2	0	0	Not-determined	Genome-fragment	NA	NA	0	1	no viral genes detected
s18v1-PF_17233	4259	No	NA	3	0	3	Low-quality	Genome-fragment	0.42	AAI-based (medium-confidence)	0	1	no viral genes detected
s18v1-PF_17318	1427	No	NA	3	0	3	Not-determined	Genome-fragment	NA	NA	0	1	no viral genes detected
s18v1-PF_17411	1019	No	NA	1	0	1	Not-determined	Genome-fragment	NA	NA	0	1	no viral genes detected
s18v1-PF_17802	50650	Yes	43848	44	10	4	Medium-quality	Genome-fragment	57.33	AAI-based (high-confidence)	13.43	1
s18v1-PF_17894	1712	No	NA	1	0	0	Not-determined	Genome-fragment	NA	NA	0	1	no viral genes detected
s18v1-PF_17987	1073	No	NA	1	0	0	Not-determined	Genome-fragment	NA	NA	0	1	no viral genes detected
s18v1-PF_18066	1069	No	NA	1	0	1	Not-determined	Genome-fragment	NA	NA	0	1	no viral genes detected
s18v1-PF_18240	1048	No	NA	2	0	0	Not-determined	Genome-fragment	NA	NA	0	1	no viral genes detected
s18v1-PF_18326	1065	No	NA	1	0	1	Not-determined	Genome-fragment	NA	NA	0	1	no viral genes detected
s18v1-PF_18478	1775	No	NA	4	1	0	Low-quality	Genome-fragment	3.66	AAI-based (high-confidence)	0	1
s18v1-PF_18522	4587	No	NA	3	0	2	Not-determined	Genome-fragment	NA	NA	0	1	no viral genes detected
s18v1-PF_18529	1630	No	NA	3	0	2	Not-determined	Genome-fragment	NA	NA	0	1	no viral genes detected
s18v1-PF_18568	2086	No	NA	2	0	1	Not-determined	Genome-fragment	NA	NA	0	1	no viral genes detected
s18v1-PF_18595	5734	No	NA	7	0	3	Not-determined	Genome-fragment	NA	NA	0	1	no viral genes detected
s18v1-PF_18737	1654	No	NA	2	0	1	Low-quality	Genome-fragment	3.4	AAI-based (high-confidence)	0	1	no viral genes detected
s18v1-PF_18750	1089	No	NA	4	0	0	Low-quality	Genome-fragment	1.35	AAI-based (high-confidence)	0	1	no viral genes detected
s18v1-PF_18769	1387	No	NA	2	0	2	Not-determined	Genome-fragment	NA	NA	0	1	no viral genes detected
s18v1-PF_18826	1043	No	NA	3	0	0	Not-determined	Genome-fragment	NA	NA	0	1	no viral genes detected
s18v1-PF_18832	1382	No	NA	2	0	1	Not-determined	Genome-fragment	NA	NA	0	1	no viral genes detected
s18v1-PF_18867	2148	No	NA	3	0	1	Low-quality	Genome-fragment	4.3	AAI-based (medium-confidence)	0	1	no viral genes detected
s18v1-PF_18988	1457	No	NA	2	0	1	Not-determined	Genome-fragment	NA	NA	0	1	no viral genes detected
s18v1-PF_18993	1116	No	NA	2	1	0	Low-quality	Genome-fragment	2.76	AAI-based (high-confidence)	0	1
s18v1-PF_19008	3733	No	NA	6	0	1	Not-determined	Genome-fragment	NA	NA	0	1	no viral genes detected
s18v1-PF_19019	3709	No	NA	4	0	4	Not-determined	Genome-fragment	NA	NA	0	1	no viral genes detected
s18v1-PF_19070	1278	No	NA	1	0	1	Not-determined	Genome-fragment	NA	NA	0	1	no viral genes detected
s18v1-PF_19165	1683	No	NA	2	0	2	Not-determined	Genome-fragment	NA	NA	0	1	no viral genes detected
s18v1-PF_19206	1765	No	NA	2	0	1	Not-determined	Genome-fragment	NA	NA	0	1	no viral genes detected
s18v1-PF_19341	1548	No	NA	1	0	0	Not-determined	Genome-fragment	NA	NA	0	1	no viral genes detected
s18v1-PF_19478	1448	No	NA	1	0	0	Not-determined	Genome-fragment	NA	NA	0	1	no viral genes detected
s18v1-PF_19618	1253	No	NA	2	0	2	Not-determined	Genome-fragment	NA	NA	0	1	no viral genes detected
s18v1-PF_19628	1177	No	NA	1	0	0	Not-determined	Genome-fragment	NA	NA	0	1	no viral genes detected
s18v1-PF_19725	1130	No	NA	1	0	0	Not-determined	Genome-fragment	NA	NA	0	1	no viral genes detected
s18v1-PF_19814	1716	No	NA	3	0	2	Not-determined	Genome-fragment	NA	NA	0	1	no viral genes detected
s18v1-PF_19834	1181	No	NA	2	0	2	Not-determined	Genome-fragment	NA	NA	0	1	no viral genes detected
s18v1-PF_19850	1177	No	NA	1	0	1	Not-determined	Genome-fragment	NA	NA	0	1	no viral genes detected
s18v1-PF_19860	2383	No	NA	3	0	1	Not-determined	Genome-fragment	NA	NA	0	1	no viral genes detected
s18v1-PF_20012	1015	No	NA	1	1	0	Low-quality	Genome-fragment	1.71	HMM-based (lower-bound)	0	1
s18v1-PF_20026	1895	No	NA	3	0	1	Not-determined	Genome-fragment	NA	NA	0	1	no viral genes detected
s18v1-PF_20075	3114	No	NA	4	0	2	Not-determined	Genome-fragment	NA	NA	0	1	no viral genes detected
s18v1-PF_20116	1068	No	NA	1	0	0	Not-determined	Genome-fragment	NA	NA	0	1	no viral genes detected
s18v1-PF_20166	1062	No	NA	2	0	2	Not-determined	Genome-fragment	NA	NA	0	1	no viral genes detected
s18v1-PF_20422	1054	No	NA	1	0	1	Not-determined	Genome-fragment	NA	NA	0	1	no viral genes detected
s18v1-PF_20450	2061	No	NA	1	0	0	Not-determined	Genome-fragment	NA	NA	0	1	no viral genes detected
s18v1-PF_20459	10350	No	NA	28	2	0	Low-quality	Genome-fragment	22.87	AAI-based (high-confidence)	0	1
s18v1-PF_20762	1003	No	NA	1	0	1	Not-determined	Genome-fragment	NA	NA	0	1	no viral genes detected
s18v1-PF_20835	1042	No	NA	1	0	1	Not-determined	Genome-fragment	NA	NA	0	1	no viral genes detected
s18v1-PF_21087	1312	No	NA	2	0	2	Not-determined	Genome-fragment	NA	NA	0	1	no viral genes detected
s18v1-PF_21117	3257	No	NA	3	0	2	Not-determined	Genome-fragment	NA	NA	0	1	no viral genes detected
s18v1-PF_21202	1202	No	NA	2	0	1	Not-determined	Genome-fragment	NA	NA	0	1	no viral genes detected
s18v1-PF_21206	1484	No	NA	1	0	0	Not-determined	Genome-fragment	NA	NA	0	1	no viral genes detected
s18v1-PF_21298	1127	No	NA	1	0	0	Not-determined	Genome-fragment	NA	NA	0	1	no viral genes detected
s18v1-PF_21478	1007	No	NA	1	1	0	Not-determined	Genome-fragment	NA	NA	0	1
s18v1-PF_21659	1213	No	NA	2	0	1	Not-determined	Genome-fragment	NA	NA	0	1	no viral genes detected
s18v1-PF_21679	1093	No	NA	1	0	0	Not-determined	Genome-fragment	NA	NA	0	1	no viral genes detected
s18v1-PF_21690	1063	No	NA	1	0	0	Not-determined	Genome-fragment	NA	NA	0	1	no viral genes detected
s18v1-PF_21809	1457	No	NA	1	0	1	Not-determined	Genome-fragment	NA	NA	0	1	no viral genes detected
s18v1-PF_21833	8662	No	NA	8	3	0	Low-quality	Genome-fragment	24.26	AAI-based (high-confidence)	0	1
s18v1-PF_21838	1314	No	NA	2	0	2	Not-determined	Genome-fragment	NA	NA	0	1	no viral genes detected
s18v1-PF_21842	3471	No	NA	3	0	3	Not-determined	Genome-fragment	NA	NA	0	1	no viral genes detected
s18v1-PF_21922	1296	No	NA	2	0	1	Not-determined	Genome-fragment	NA	NA	0	1	no viral genes detected
s18v1-PF_21981	1448	No	NA	2	0	2	Not-determined	Genome-fragment	NA	NA	0	1	no viral genes detected
s18v1-PF_21989	1099	No	NA	2	0	0	Not-determined	Genome-fragment	NA	NA	0	1	no viral genes detected
s18v1-PF_22104	1007	No	NA	1	0	1	Not-determined	Genome-fragment	NA	NA	0	1	no viral genes detected
s18v1-PF_22117	1128	No	NA	2	0	0	Not-determined	Genome-fragment	NA	NA	0	1	no viral genes detected
s18v1-PF_22135	2633	No	NA	1	0	0	Not-determined	Genome-fragment	NA	NA	0	1	no viral genes detected
s18v1-PF_22195	1372	No	NA	3	0	0	Not-determined	Genome-fragment	NA	NA	0	1	no viral genes detected
s18v1-PF_22211	1006	No	NA	1	1	0	Low-quality	Genome-fragment	2.52	AAI-based (high-confidence)	0	1
s18v1-PF_22216	1233	No	NA	1	0	1	Not-determined	Genome-fragment	NA	NA	0	1	no viral genes detected
s18v1-PF_22217	1124	No	NA	3	1	0	Low-quality	Genome-fragment	2.78	AAI-based (medium-confidence)	0	1
s18v1-PF_22327	3314	No	NA	9	0	0	Low-quality	Genome-fragment	8.63	AAI-based (high-confidence)	0	1	no viral genes detected
s18v1-PF_22678	1202	No	NA	1	1	0	Low-quality	Genome-fragment	2.1	HMM-based (lower-bound)	0	1
s18v1-PF_22820	3484	No	NA	4	2	0	Low-quality	Genome-fragment	10.78	AAI-based (high-confidence)	0	1
s18v1-PF_22984	2610	No	NA	3	0	2	Not-determined	Genome-fragment	NA	NA	0	1	no viral genes detected
s18v1-PF_22993	1662	No	NA	3	0	1	Not-determined	Genome-fragment	NA	NA	0	1	no viral genes detected
s18v1-PF_23244	1514	No	NA	3	0	3	Not-determined	Genome-fragment	NA	NA	0	1	no viral genes detected
s18v1-PF_23510	1084	No	NA	3	1	0	Low-quality	Genome-fragment	0.87	AAI-based (medium-confidence)	0	1
s18v1-PF_23517	1813	No	NA	3	0	0	Low-quality	Genome-fragment	4.21	AAI-based (high-confidence)	0	1	no viral genes detected
s18v1-PF_23660	4498	No	NA	8	0	0	Not-determined	Genome-fragment	NA	NA	0	1	no viral genes detected
s18v1-PF_23676	2650	No	NA	2	0	0	Not-determined	Genome-fragment	NA	NA	0	1	no viral genes detected
s18v1-PF_23741	4005	No	NA	3	0	2	Not-determined	Genome-fragment	NA	NA	0	1	no viral genes detected
s18v1-PF_23797	1529	No	NA	1	0	0	Not-determined	Genome-fragment	NA	NA	0	1	no viral genes detected
s18v1-PF_23888	4411	No	NA	4	0	2	Not-determined	Genome-fragment	NA	NA	0	1	no viral genes detected
s18v1-PF_23943	2113	No	NA	3	0	1	Not-determined	Genome-fragment	NA	NA	0	1	no viral genes detected
s18v1-PF_23962	1049	No	NA	2	0	0	Not-determined	Genome-fragment	NA	NA	0	1	no viral genes detected
s18v1-PF_23991	1015	No	NA	2	0	0	Not-determined	Genome-fragment	NA	NA	0	1	no viral genes detected
s18v1-PF_24057	2112	No	NA	1	0	1	Not-determined	Genome-fragment	NA	NA	0	1	no viral genes detected
s18v1-PF_24074	1568	No	NA	1	0	1	Not-determined	Genome-fragment	NA	NA	0	1	no viral genes detected
s18v1-PF_24089	5336	No	NA	5	0	1	Low-quality	Genome-fragment	5.47	AAI-based (medium-confidence)	0	1	no viral genes detected
s18v1-PF_24255	1383	No	NA	2	0	0	Not-determined	Genome-fragment	NA	NA	0	1	no viral genes detected
s18v1-PF_24264	1992	No	NA	2	0	0	Low-quality	Genome-fragment	4.09	AAI-based (high-confidence)	0	1.05	no viral genes detected
s18v1-PF_24281	1018	No	NA	2	0	0	Low-quality	Genome-fragment	1.94	AAI-based (medium-confidence)	0	1	no viral genes detected
s18v1-PF_24324	1027	No	NA	2	0	0	Not-determined	Genome-fragment	NA	NA	0	1	no viral genes detected
s18v1-PF_24344	5932	No	NA	4	0	3	Not-determined	Genome-fragment	NA	NA	0	1	no viral genes detected
s18v1-PF_24377	1103	No	NA	3	0	1	Low-quality	Genome-fragment	0.55	AAI-based (medium-confidence)	0	1	no viral genes detected
s18v1-PF_24490	1366	No	NA	3	0	1	Not-determined	Genome-fragment	NA	NA	0	1	no viral genes detected
s18v1-PF_24551	1552	No	NA	2	0	1	Low-quality	Genome-fragment	1.7	AAI-based (medium-confidence)	0	1	no viral genes detected
s18v1-PF_24588	92048	No	NA	83	10	0	Complete	High-quality	100	DTR (high-confidence)	0	1
s18v1-PF_24767	1619	No	NA	2	0	0	Not-determined	Genome-fragment	NA	NA	0	1	no viral genes detected
s18v1-PF_24833	2410	No	NA	3	0	1	Not-determined	Genome-fragment	NA	NA	0	1	no viral genes detected
s18v1-PF_24934	5507	No	NA	8	6	0	Low-quality	Genome-fragment	12.77	AAI-based (high-confidence)	0	1
s18v1-PF_25104	6584	No	NA	9	0	7	Not-determined	Genome-fragment	NA	NA	0	1	no viral genes detected
s18v1-PF_25162	1681	No	NA	1	0	0	Low-quality	Genome-fragment	0.26	AAI-based (high-confidence)	0	1	no viral genes detected
s18v1-PF_25362	2592	No	NA	3	1	0	Low-quality	Genome-fragment	9.25	HMM-based (lower-bound)	0	1
s18v1-PF_25422	1188	No	NA	2	1	0	Low-quality	Genome-fragment	2.65	AAI-based (high-confidence)	0	1
s18v1-PF_25454	5004	No	NA	7	3	0	Low-quality	Genome-fragment	11.19	AAI-based (high-confidence)	0	1
s18v1-PF_25463	10959	No	NA	6	0	5	Low-quality	Genome-fragment	4.3	AAI-based (medium-confidence)	0	1	no viral genes detected
s18v1-PF_25493	1105	No	NA	2	0	1	Not-determined	Genome-fragment	NA	NA	0	1	no viral genes detected
s18v1-PF_25536	3041	No	NA	5	0	1	Not-determined	Genome-fragment	NA	NA	0	1	no viral genes detected
s18v1-PF_25570	1296	No	NA	2	0	1	Not-determined	Genome-fragment	NA	NA	0	1	no viral genes detected
s18v1-PF_25664	3894	No	NA	2	0	1	Not-determined	Genome-fragment	NA	NA	0	1	no viral genes detected
s18v1-PF_25717	1956	No	NA	3	0	1	Not-determined	Genome-fragment	NA	NA	0	1	no viral genes detected
s18v1-PF_25912	1779	No	NA	2	0	1	Not-determined	Genome-fragment	NA	NA	0	1	no viral genes detected
s18v1-PF_26084	1079	No	NA	2	0	1	Not-determined	Genome-fragment	NA	NA	0	1	no viral genes detected
s18v1-PF_26174	3741	No	NA	5	0	2	Not-determined	Genome-fragment	NA	NA	0	1	no viral genes detected
s18v1-PF_26205	1713	No	NA	1	0	1	Not-determined	Genome-fragment	NA	NA	0	1	no viral genes detected
s18v1-PF_26258	178706	No	NA	230	37	14	Complete	High-quality	100	DTR (high-confidence)	0	1
s18v1-PF_26410	5412	No	NA	2	0	1	Not-determined	Genome-fragment	NA	NA	0	1	no viral genes detected
s18v1-PF_26670	1160	No	NA	1	0	0	Not-determined	Genome-fragment	NA	NA	0	1	no viral genes detected
s18v1-PF_26681	3600	No	NA	3	0	2	Not-determined	Genome-fragment	NA	NA	0	1	no viral genes detected
s18v1-PF_26834	1082	No	NA	2	0	0	Not-determined	Genome-fragment	NA	NA	0	1	no viral genes detected
s18v1-PF_26964	5445	No	NA	5	0	2	Low-quality	Genome-fragment	1	AAI-based (medium-confidence)	0	1	no viral genes detected
s18v1-PF_27003	3656	No	NA	5	0	2	Not-determined	Genome-fragment	NA	NA	0	1	no viral genes detected
s18v1-PF_27052	3780	No	NA	3	0	1	Low-quality	Genome-fragment	24.24	AAI-based (high-confidence)	0	1	no viral genes detected
s18v1-PF_27367	1055	No	NA	1	0	0	Not-determined	Genome-fragment	NA	NA	0	1	no viral genes detected
s18v1-PF_27440	5267	No	NA	11	0	0	Low-quality	Genome-fragment	6.54	AAI-based (high-confidence)	0	1	no viral genes detected
s18v1-PF_27608	2100	No	NA	1	0	0	Low-quality	Genome-fragment	4.44	AAI-based (medium-confidence)	0	1	no viral genes detected
s18v1-PF_27614	1157	No	NA	1	0	1	Not-determined	Genome-fragment	NA	NA	0	1	no viral genes detected
s18v1-PF_27619	1799	No	NA	2	0	2	Not-determined	Genome-fragment	NA	NA	0	1	no viral genes detected
s18v1-PF_27651	1229	No	NA	1	0	1	Not-determined	Genome-fragment	NA	NA	0	1	no viral genes detected
s18v1-PF_27655	1037	No	NA	1	0	1	Not-determined	Genome-fragment	NA	NA	0	1	no viral genes detected
s18v1-PF_27662	1055	No	NA	1	0	1	Not-determined	Genome-fragment	NA	NA	0	1	no viral genes detected
s18v1-PF_27836	1234	No	NA	1	0	0	Not-determined	Genome-fragment	NA	NA	0	1	no viral genes detected
s18v1-PF_27867	3299	No	NA	4	0	2	Not-determined	Genome-fragment	NA	NA	0	1	no viral genes detected
s18v1-PF_27873	24028	No	NA	36	3	0	Low-quality	Genome-fragment	49.7	AAI-based (high-confidence)	0	1
s18v1-PF_27966	1599	No	NA	1	0	1	Not-determined	Genome-fragment	NA	NA	0	1	no viral genes detected
s18v1-PF_28060	1502	No	NA	1	0	1	Not-determined	Genome-fragment	NA	NA	0	1	no viral genes detected
s18v1-PF_28185	1271	No	NA	1	0	0	Not-determined	Genome-fragment	NA	NA	0	1	no viral genes detected
s18v1-PF_28438	5198	No	NA	15	2	0	Low-quality	Genome-fragment	11.6	AAI-based (high-confidence)	0	1
s18v1-PF_28475	1202	No	NA	1	0	1	Not-determined	Genome-fragment	NA	NA	0	1	no viral genes detected
s18v1-PF_28516	1258	No	NA	2	0	1	Not-determined	Genome-fragment	NA	NA	0	1	no viral genes detected
s18v1-PF_28574	1561	No	NA	2	0	0	Low-quality	Genome-fragment	0.26	AAI-based (medium-confidence)	0	1	no viral genes detected
s18v1-PF_28637	1021	No	NA	1	0	1	Not-determined	Genome-fragment	NA	NA	0	1	no viral genes detected
s18v1-PF_28760	1181	No	NA	1	0	0	Not-determined	Genome-fragment	NA	NA	0	1	no viral genes detected
s18v1-PF_28774	1116	No	NA	1	0	1	Not-determined	Genome-fragment	NA	NA	0	1	no viral genes detected
s18v1-PF_28858	1586	No	NA	3	0	2	Not-determined	Genome-fragment	NA	NA	0	1	no viral genes detected
s18v1-PF_28991	1094	No	NA	2	0	1	Not-determined	Genome-fragment	NA	NA	0	1	no viral genes detected
s18v1-PF_29286	1038	No	NA	2	0	2	Not-determined	Genome-fragment	NA	NA	0	1	no viral genes detected
s18v1-PF_29301	1603	No	NA	2	0	1	Not-determined	Genome-fragment	NA	NA	0	1	no viral genes detected
s18v1-PF_29376	1291	No	NA	5	0	0	Low-quality	Genome-fragment	3.27	AAI-based (high-confidence)	0	1	no viral genes detected
s18v1-PF_29494	1265	No	NA	3	0	1	Not-determined	Genome-fragment	NA	NA	0	1	no viral genes detected
s18v1-PF_29575	2200	No	NA	5	1	0	Low-quality	Genome-fragment	4.76	AAI-based (high-confidence)	0	1
s18v1-PF_29601	3048	No	NA	4	0	0	Not-determined	Genome-fragment	NA	NA	0	1	no viral genes detected
s18v1-PF_29604	1383	No	NA	2	0	1	Not-determined	Genome-fragment	NA	NA	0	1	no viral genes detected
s18v1-PF_29606	1029	No	NA	2	0	0	Not-determined	Genome-fragment	NA	NA	0	1	no viral genes detected
s18v1-PF_29658	1314	No	NA	1	0	1	Not-determined	Genome-fragment	NA	NA	0	1	no viral genes detected
s18v1-PF_29715	4180	No	NA	4	0	3	Not-determined	Genome-fragment	NA	NA	0	1	no viral genes detected
s18v1-PF_29716	1347	No	NA	2	0	0	Not-determined	Genome-fragment	NA	NA	0	1	no viral genes detected
s18v1-PF_29840	1228	No	NA	2	0	0	Not-determined	Genome-fragment	NA	NA	0	1	no viral genes detected
s18v1-PF_30024	1847	No	NA	1	0	1	Not-determined	Genome-fragment	NA	NA	0	1	no viral genes detected
s18v1-PF_30056	3786	No	NA	6	0	0	Low-quality	Genome-fragment	4.8	AAI-based (high-confidence)	0	1	no viral genes detected
s18v1-PF_30119	2140	No	NA	4	0	1	Not-determined	Genome-fragment	NA	NA	0	1	no viral genes detected
s18v1-PF_30179	2717	No	NA	3	0	3	Low-quality	Genome-fragment	7.12	AAI-based (medium-confidence)	0	1	no viral genes detected
s18v1-PF_30198	1018	No	NA	3	0	2	Not-determined	Genome-fragment	NA	NA	0	1	no viral genes detected
s18v1-PF_30241	1447	No	NA	1	0	1	Not-determined	Genome-fragment	NA	NA	0	1	no viral genes detected
s18v1-PF_30309	9555	No	NA	23	0	0	Low-quality	Genome-fragment	5.94	AAI-based (high-confidence)	0	1	no viral genes detected
s18v1-PF_30319	1066	No	NA	1	0	0	Not-determined	Genome-fragment	NA	NA	0	1	no viral genes detected
s18v1-PF_30530	1003	No	NA	1	1	0	Low-quality	Genome-fragment	1.64	HMM-based (lower-bound)	0	1
s18v1-PF_30607	1206	No	NA	1	0	0	Not-determined	Genome-fragment	NA	NA	0	1	no viral genes detected
s18v1-PF_30769	1428	No	NA	1	0	1	Not-determined	Genome-fragment	NA	NA	0	1	no viral genes detected
s18v1-PF_30794	1515	No	NA	1	0	0	Not-determined	Genome-fragment	NA	NA	0	1	no viral genes detected
s18v1-PF_30948	1065	No	NA	2	0	0	Low-quality	Genome-fragment	1.78	AAI-based (high-confidence)	0	1	no viral genes detected
s18v1-PF_30991	1065	No	NA	2	0	1	Not-determined	Genome-fragment	NA	NA	0	1	no viral genes detected
s18v1-PF_31096	1202	No	NA	3	0	0	Not-determined	Genome-fragment	NA	NA	0	1	no viral genes detected
s18v1-PF_31131	1411	No	NA	2	0	2	Not-determined	Genome-fragment	NA	NA	0	1	no viral genes detected
s18v1-PF_31307	1101	No	NA	2	0	1	Not-determined	Genome-fragment	NA	NA	0	1	no viral genes detected
s18v1-PF_31478	1403	No	NA	4	0	4	Not-determined	Genome-fragment	NA	NA	0	1	no viral genes detected
s18v1-PF_31532	1591	No	NA	2	0	0	Not-determined	Genome-fragment	NA	NA	0	1	no viral genes detected
s18v1-PF_31558	2068	No	NA	2	0	1	Not-determined	Genome-fragment	NA	NA	0	1	no viral genes detected
s18v1-PF_31561	2649	No	NA	2	0	0	Low-quality	Genome-fragment	6.69	AAI-based (high-confidence)	0	1	no viral genes detected
s18v1-PF_31567	3625	No	NA	4	0	1	Low-quality	Genome-fragment	4.66	AAI-based (medium-confidence)	0	1	no viral genes detected
s18v1-PF_31600	1521	No	NA	2	0	1	Not-determined	Genome-fragment	NA	NA	0	1	no viral genes detected
s18v1-PF_31971	1125	No	NA	2	0	1	Not-determined	Genome-fragment	NA	NA	0	1	no viral genes detected
s18v1-PF_31993	1231	No	NA	1	0	0	Not-determined	Genome-fragment	NA	NA	0	1	no viral genes detected
s18v1-PF_32121	1458	No	NA	1	0	1	Not-determined	Genome-fragment	NA	NA	0	1	no viral genes detected
s18v1-PF_32171	1625	No	NA	1	0	0	Not-determined	Genome-fragment	NA	NA	0	1	no viral genes detected
s18v1-PF_32245	1874	No	NA	3	0	3	Not-determined	Genome-fragment	NA	NA	0	1	no viral genes detected
s18v1-PF_32280	1078	No	NA	1	0	1	Not-determined	Genome-fragment	NA	NA	0	1	no viral genes detected
s18v1-PF_32378	1417	No	NA	2	0	1	Not-determined	Genome-fragment	NA	NA	0	1	no viral genes detected
s18v1-PF_32543	1134	No	NA	3	0	1	Not-determined	Genome-fragment	NA	NA	0	1	no viral genes detected
s18v1-PF_32555	1194	No	NA	1	0	1	Not-determined	Genome-fragment	NA	NA	0	1	no viral genes detected
s18v1-PF_32671	1063	No	NA	1	0	1	Not-determined	Genome-fragment	NA	NA	0	1	no viral genes detected
s18v1-PF_32871	1189	No	NA	2	0	0	Low-quality	Genome-fragment	2.65	AAI-based (medium-confidence)	0	1	no viral genes detected
s18v1-PF_32914	1013	No	NA	1	0	1	Not-determined	Genome-fragment	NA	NA	0	1	no viral genes detected
s18v1-PF_32972	1364	No	NA	2	0	1	Not-determined	Genome-fragment	NA	NA	0	1	no viral genes detected
s18v1-PF_32996	1103	No	NA	2	0	0	Not-determined	Genome-fragment	NA	NA	0	1	no viral genes detected
s18v1-PF_33029	1328	No	NA	3	0	0	Low-quality	Genome-fragment	0.7	AAI-based (medium-confidence)	0	1	no viral genes detected
s18v1-PF_33063	3918	No	NA	4	0	3	Not-determined	Genome-fragment	NA	NA	0	1	no viral genes detected
s18v1-PF_33089	1036	No	NA	2	0	0	Not-determined	Genome-fragment	NA	NA	0	1	no viral genes detected
s18v1-PF_33108	1628	No	NA	2	0	1	Not-determined	Genome-fragment	NA	NA	0	1	no viral genes detected
s18v1-PF_33151	1252	No	NA	2	0	0	Not-determined	Genome-fragment	NA	NA	0	1	no viral genes detected
s18v1-PF_33153	3458	No	NA	4	0	3	Not-determined	Genome-fragment	NA	NA	0	1	no viral genes detected
s18v1-PF_33217	1402	No	NA	1	1	0	Low-quality	Genome-fragment	0.31	HMM-based (lower-bound)	0	1
s18v1-PF_33323	1040	No	NA	2	0	0	Not-determined	Genome-fragment	NA	NA	0	1	no viral genes detected
s18v1-PF_33464	39882	No	NA	67	24	0	Complete	High-quality	100	DTR (high-confidence)	0	1
s18v1-PF_33509	2508	No	NA	3	0	1	Not-determined	Genome-fragment	NA	NA	0	1	no viral genes detected
s18v1-PF_33698	1143	No	NA	1	0	0	Not-determined	Genome-fragment	NA	NA	0	1	no viral genes detected
s18v1-PF_33865	1489	No	NA	2	1	0	Low-quality	Genome-fragment	1.93	AAI-based (high-confidence)	0	1
s18v1-PF_33866	1800	No	NA	1	0	0	Not-determined	Genome-fragment	NA	NA	0	1	no viral genes detected
s18v1-PF_33868	5643	No	NA	6	0	2	Not-determined	Genome-fragment	NA	NA	0	1	no viral genes detected
s18v1-PF_33880	4522	No	NA	7	0	0	Low-quality	Genome-fragment	8.27	AAI-based (high-confidence)	0	1	no viral genes detected
s18v1-PF_34033	1614	No	NA	1	0	0	Low-quality	Genome-fragment	3.73	AAI-based (high-confidence)	0	1	no viral genes detected
s18v1-PF_34061	2476	No	NA	1	0	1	Not-determined	Genome-fragment	NA	NA	0	1	no viral genes detected
s18v1-PF_34115	1155	No	NA	3	0	3	Not-determined	Genome-fragment	NA	NA	0	1	no viral genes detected
s18v1-PF_34165	1319	No	NA	2	0	0	Not-determined	Genome-fragment	NA	NA	0	1	no viral genes detected
s18v1-PF_34193	1089	No	NA	3	0	1	Not-determined	Genome-fragment	NA	NA	0	1	no viral genes detected
s18v1-PF_34241	1332	No	NA	2	0	1	Not-determined	Genome-fragment	NA	NA	0	1	no viral genes detected
s18v1-PF_34276	1034	No	NA	2	0	2	Not-determined	Genome-fragment	NA	NA	0	1	no viral genes detected
s18v1-PF_34306	1209	No	NA	2	0	0	Not-determined	Genome-fragment	NA	NA	0	1	no viral genes detected
s18v1-PF_34344	2845	No	NA	3	0	1	Not-determined	Genome-fragment	NA	NA	0	1	no viral genes detected
s18v1-PF_34438	7065	No	NA	4	1	2	Low-quality	Genome-fragment	4.74	HMM-based (lower-bound)	0	1
s18v1-PF_34781	3922	No	NA	4	0	3	Not-determined	Genome-fragment	NA	NA	0	1	no viral genes detected
s18v1-PF_34840	1518	No	NA	1	0	0	Not-determined	Genome-fragment	NA	NA	0	1	no viral genes detected
s18v1-PF_34855	2546	No	NA	3	0	3	Not-determined	Genome-fragment	NA	NA	0	1	no viral genes detected
s18v1-PF_35047	3532	No	NA	5	0	0	Not-determined	Genome-fragment	NA	NA	0	1	no viral genes detected
s18v1-PF_35050	1351	No	NA	3	1	0	Low-quality	Genome-fragment	2.39	AAI-based (high-confidence)	0	1
s18v1-PF_35056	1115	No	NA	1	0	1	Not-determined	Genome-fragment	NA	NA	0	1	no viral genes detected
s18v1-PF_35125	1389	No	NA	2	0	2	Not-determined	Genome-fragment	NA	NA	0	1	no viral genes detected
s18v1-PF_35127	1177	No	NA	1	0	1	Not-determined	Genome-fragment	NA	NA	0	1	no viral genes detected
s18v1-PF_35245	1058	No	NA	1	0	1	Not-determined	Genome-fragment	NA	NA	0	1	no viral genes detected
s18v1-PF_35357	1023	No	NA	2	0	0	Not-determined	Genome-fragment	NA	NA	0	1	no viral genes detected
s18v1-PF_35538	1184	No	NA	2	0	0	Not-determined	Genome-fragment	NA	NA	0	1	no viral genes detected
s18v1-PF_35546	1760	No	NA	3	0	3	Not-determined	Genome-fragment	NA	NA	0	1	no viral genes detected
s18v1-PF_35595	2496	No	NA	4	0	3	Not-determined	Genome-fragment	NA	NA	0	1	no viral genes detected
s18v1-PF_35748	1005	No	NA	1	0	0	Not-determined	Genome-fragment	NA	NA	0	1	no viral genes detected
s18v1-PF_35780	1454	No	NA	1	0	1	Not-determined	Genome-fragment	NA	NA	0	1	no viral genes detected
s18v1-PF_35823	1075	No	NA	1	0	0	Not-determined	Genome-fragment	NA	NA	0	1	no viral genes detected
s18v1-PF_35910	3320	No	NA	3	0	3	Not-determined	Genome-fragment	NA	NA	0	1	no viral genes detected
s18v1-PF_35912	1104	No	NA	1	0	1	Not-determined	Genome-fragment	NA	NA	0	1	no viral genes detected
s18v1-PF_35967	1030	No	NA	2	0	2	Not-determined	Genome-fragment	NA	NA	0	1	no viral genes detected
s18v1-PF_36053	1942	No	NA	3	0	0	Not-determined	Genome-fragment	NA	NA	0	1	no viral genes detected
s18v1-PF_36107	28489	No	NA	56	9	0	Medium-quality	Genome-fragment	68.25	AAI-based (high-confidence)	0	1
s18v1-PF_36123	1098	No	NA	2	0	1	Not-determined	Genome-fragment	NA	NA	0	1	no viral genes detected
s18v1-PF_36200	1644	No	NA	5	0	0	Low-quality	Genome-fragment	3.39	AAI-based (high-confidence)	0	1	no viral genes detected
s18v1-PF_36215	2969	No	NA	3	2	0	Low-quality	Genome-fragment	9.8	HMM-based (lower-bound)	0	1
s18v1-PF_36255	4579	No	NA	5	0	4	Not-determined	Genome-fragment	NA	NA	0	1	no viral genes detected
s18v1-PF_36448	4108	No	NA	2	0	2	Not-determined	Genome-fragment	NA	NA	0	1	no viral genes detected
s18v1-PF_36488	12491	No	NA	17	3	0	Low-quality	Genome-fragment	11.45	AAI-based (high-confidence)	0	1
s18v1-PF_36495	1857	No	NA	3	0	3	Not-determined	Genome-fragment	NA	NA	0	1	no viral genes detected
s18v1-PF_36501	3500	No	NA	4	0	3	Low-quality	Genome-fragment	2	AAI-based (medium-confidence)	0	1	no viral genes detected
s18v1-PF_36503	1329	No	NA	1	0	0	Not-determined	Genome-fragment	NA	NA	0	1	no viral genes detected
s18v1-PF_36527	1005	No	NA	2	0	1	Not-determined	Genome-fragment	NA	NA	0	1	no viral genes detected
s18v1-PF_36547	1497	No	NA	1	0	0	Low-quality	Genome-fragment	1.16	AAI-based (high-confidence)	0	1	no viral genes detected
s18v1-PF_36565	1737	No	NA	3	0	0	Not-determined	Genome-fragment	NA	NA	0	1	no viral genes detected
s18v1-PF_36863	2341	No	NA	3	0	2	Not-determined	Genome-fragment	NA	NA	0	1	no viral genes detected
s18v1-PF_36981	1426	No	NA	4	0	3	Not-determined	Genome-fragment	NA	NA	0	1	no viral genes detected
s18v1-PF_37068	3030	No	NA	2	0	2	Not-determined	Genome-fragment	NA	NA	0	1	no viral genes detected
s18v1-PF_37093	1112	No	NA	2	0	2	Not-determined	Genome-fragment	NA	NA	0	1	no viral genes detected
s18v1-PF_37310	1039	No	NA	1	0	1	Not-determined	Genome-fragment	NA	NA	0	1	no viral genes detected
s18v1-PF_37375	3350	No	NA	2	0	2	Not-determined	Genome-fragment	NA	NA	0	1	no viral genes detected
s18v1-PF_37421	1796	No	NA	1	0	1	Not-determined	Genome-fragment	NA	NA	0	1	no viral genes detected
s18v1-PF_37445	7060	No	NA	5	0	4	Not-determined	Genome-fragment	NA	NA	0	1	no viral genes detected
s18v1-PF_37454	1206	No	NA	2	0	1	Not-determined	Genome-fragment	NA	NA	0	1	no viral genes detected
s18v1-PF_37662	1190	No	NA	1	0	1	Low-quality	Genome-fragment	0.21	AAI-based (high-confidence)	0	1	no viral genes detected
s18v1-PF_37665	1457	No	NA	2	0	1	Not-determined	Genome-fragment	NA	NA	0	1	no viral genes detected
s18v1-PF_37768	1318	No	NA	2	0	2	Not-determined	Genome-fragment	NA	NA	0	1	no viral genes detected
s18v1-PF_37840	1590	No	NA	2	0	0	Not-determined	Genome-fragment	NA	NA	0	1	no viral genes detected
s18v1-PF_37911	2227	No	NA	3	0	0	Not-determined	Genome-fragment	NA	NA	0	1	no viral genes detected
s18v1-PF_37916	1592	No	NA	1	0	1	Not-determined	Genome-fragment	NA	NA	0	1	no viral genes detected
s18v1-PF_38265	1267	No	NA	1	0	1	Not-determined	Genome-fragment	NA	NA	0	1	no viral genes detected
s18v1-PF_38356	1875	No	NA	1	0	0	Not-determined	Genome-fragment	NA	NA	0	1	no viral genes detected
s18v1-PF_38460	2735	No	NA	4	0	1	Not-determined	Genome-fragment	NA	NA	0	1	no viral genes detected
s18v1-PF_38477	6135	No	NA	6	0	6	Not-determined	Genome-fragment	NA	NA	0	1	no viral genes detected
s18v1-PF_38518	45432	No	NA	72	16	1	Complete	High-quality	100	DTR (high-confidence)	0	1
s18v1-PF_38534	1912	No	NA	5	1	0	Low-quality	Genome-fragment	4.49	AAI-based (high-confidence)	0	1
s18v1-PF_38617	2730	No	NA	4	0	0	Low-quality	Genome-fragment	4.72	AAI-based (medium-confidence)	0	1	no viral genes detected
s18v1-PF_38686	1040	No	NA	3	0	1	Not-determined	Genome-fragment	NA	NA	0	1	no viral genes detected
s18v1-PF_38699	1363	No	NA	2	0	2	Not-determined	Genome-fragment	NA	NA	0	1	no viral genes detected
s18v1-PF_38726	1241	No	NA	2	0	0	Not-determined	Genome-fragment	NA	NA	0	1	no viral genes detected
s18v1-PF_38741	1239	No	NA	1	0	1	Not-determined	Genome-fragment	NA	NA	0	1	no viral genes detected
s18v1-PF_38775	2230	No	NA	1	0	0	Not-determined	Genome-fragment	NA	NA	0	1	no viral genes detected
s18v1-PF_38984	1445	No	NA	3	0	0	Not-determined	Genome-fragment	NA	NA	0	1	no viral genes detected
s18v1-PF_39165	3224	No	NA	4	0	4	Not-determined	Genome-fragment	NA	NA	0	1	no viral genes detected
s18v1-PF_39222	1753	No	NA	4	0	0	Low-quality	Genome-fragment	3.72	AAI-based (high-confidence)	0	1	no viral genes detected
s18v1-PF_39226	6299	No	NA	3	0	3	Not-determined	Genome-fragment	NA	NA	0	1	no viral genes detected
s18v1-PF_39317	1661	No	NA	2	0	1	Not-determined	Genome-fragment	NA	NA	0	1	no viral genes detected
s18v1-PF_39371	1359	No	NA	1	0	0	Not-determined	Genome-fragment	NA	NA	0	1	no viral genes detected
s18v1-PF_39397	1751	No	NA	3	0	0	Not-determined	Genome-fragment	NA	NA	0	1	no viral genes detected
s18v1-PF_39418	1212	No	NA	1	0	0	Not-determined	Genome-fragment	NA	NA	0	1	no viral genes detected
s18v1-PF_39481	1228	No	NA	1	0	1	Not-determined	Genome-fragment	NA	NA	0	1	no viral genes detected
s18v1-PF_39488	1938	No	NA	2	0	0	Not-determined	Genome-fragment	NA	NA	0	1	no viral genes detected
s18v1-PF_39498	1135	No	NA	2	0	2	Not-determined	Genome-fragment	NA	NA	0	1	no viral genes detected
s18v1-PF_39560	1089	No	NA	2	0	2	Not-determined	Genome-fragment	NA	NA	0	1	no viral genes detected
s18v1-PF_39623	1195	No	NA	2	0	0	Low-quality	Genome-fragment	2.26	AAI-based (medium-confidence)	0	1	no viral genes detected
s18v1-PF_39641	4684	No	NA	3	0	2	Low-quality	Genome-fragment	2.47	AAI-based (medium-confidence)	0	1	no viral genes detected
s18v1-PF_39686	1229	No	NA	2	0	1	Not-determined	Genome-fragment	NA	NA	0	1	no viral genes detected
s18v1-PF_39720	3746	No	NA	5	0	1	Not-determined	Genome-fragment	NA	NA	0	1	no viral genes detected
s18v1-PF_39778	1078	No	NA	2	0	1	Not-determined	Genome-fragment	NA	NA	0	1	no viral genes detected
s18v1-PF_39815	1366	No	NA	2	0	1	Not-determined	Genome-fragment	NA	NA	0	1	no viral genes detected
s18v1-PF_39843	18718	No	NA	21	0	9	Not-determined	Genome-fragment	NA	NA	0	1	no viral genes detected
s18v1-PF_39882	1220	No	NA	3	0	0	Not-determined	Genome-fragment	NA	NA	0	1	no viral genes detected
s18v1-PF_39930	1401	No	NA	1	0	1	Not-determined	Genome-fragment	NA	NA	0	1	no viral genes detected
s18v1-PF_39954	1067	No	NA	2	0	0	Low-quality	Genome-fragment	1.91	AAI-based (medium-confidence)	0	1	no viral genes detected
s18v1-PF_39978	1463	No	NA	1	0	0	Not-determined	Genome-fragment	NA	NA	0	1	no viral genes detected
s18v1-PF_39987	1129	No	NA	1	0	1	Not-determined	Genome-fragment	NA	NA	0	1	no viral genes detected
s18v1-PF_40140	2165	No	NA	1	0	0	Not-determined	Genome-fragment	NA	NA	0	1	no viral genes detected
s18v1-PF_40501	1478	No	NA	2	0	1	Not-determined	Genome-fragment	NA	NA	0	1	no viral genes detected
s18v1-PF_40598	17110	No	NA	25	6	1	Low-quality	Genome-fragment	42.24	AAI-based (high-confidence)	0	1
s18v1-PF_40781	1082	No	NA	2	0	0	Not-determined	Genome-fragment	NA	NA	0	1	no viral genes detected
s18v1-PF_40793	1233	No	NA	3	1	0	Low-quality	Genome-fragment	2.67	AAI-based (high-confidence)	0	1
s18v1-PF_40811	1441	No	NA	2	0	0	Not-determined	Genome-fragment	NA	NA	0	1	no viral genes detected
s18v1-PF_40889	1191	No	NA	2	0	0	Not-determined	Genome-fragment	NA	NA	0	1	no viral genes detected
s18v1-PF_41016	3822	No	NA	3	0	2	Not-determined	Genome-fragment	NA	NA	0	1	no viral genes detected
s18v1-PF_41041	1199	No	NA	3	0	1	Not-determined	Genome-fragment	NA	NA	0	1	no viral genes detected
s18v1-PF_41450	3837	No	NA	1	0	1	Not-determined	Genome-fragment	NA	NA	0	1	no viral genes detected
s18v1-PF_41472	1667	No	NA	4	0	1	Low-quality	Genome-fragment	0.64	AAI-based (medium-confidence)	0	1	no viral genes detected
s18v1-PF_41500	1066	No	NA	3	0	0	Not-determined	Genome-fragment	NA	NA	0	1	no viral genes detected
s18v1-PF_41599	1998	No	NA	2	0	1	Not-determined	Genome-fragment	NA	NA	0	1	no viral genes detected
s18v1-PF_41605	1977	No	NA	3	1	0	Low-quality	Genome-fragment	1.18	AAI-based (medium-confidence)	0	1
s18v1-PF_41660	2870	No	NA	4	0	3	Not-determined	Genome-fragment	NA	NA	0	1	no viral genes detected
s18v1-PF_41754	4817	No	NA	1	0	0	Not-determined	Genome-fragment	NA	NA	0	1	no viral genes detected
s18v1-PF_41815	4428	No	NA	6	0	1	Not-determined	Genome-fragment	NA	NA	0	1	no viral genes detected
s18v1-PF_41866	3476	No	NA	2	0	2	Not-determined	Genome-fragment	NA	NA	0	1	no viral genes detected
s18v1-PF_41974	1174	No	NA	1	1	0	Low-quality	Genome-fragment	0.12	AAI-based (medium-confidence)	0	1
s18v1-PF_42187	2362	No	NA	2	0	1	Low-quality	Genome-fragment	2.18	AAI-based (medium-confidence)	0	1	no viral genes detected
s18v1-PF_42401	1199	No	NA	2	0	0	Not-determined	Genome-fragment	NA	NA	0	1	no viral genes detected
s18v1-PF_42437	1594	No	NA	2	0	1	Not-determined	Genome-fragment	NA	NA	0	1	no viral genes detected
s18v1-PF_42566	1029	No	NA	2	0	0	Not-determined	Genome-fragment	NA	NA	0	1.15	no viral genes detected
s18v1-PF_42585	1652	No	NA	3	0	1	Low-quality	Genome-fragment	2.64	AAI-based (medium-confidence)	0	1	no viral genes detected
s18v1-PF_42685	4473	No	NA	5	0	4	Not-determined	Genome-fragment	NA	NA	0	1	no viral genes detected
s18v1-PF_42686	1099	No	NA	1	0	0	Low-quality	Genome-fragment	3	AAI-based (high-confidence)	0	1	no viral genes detected
s18v1-PF_42795	1844	No	NA	2	0	0	Low-quality	Genome-fragment	3.61	AAI-based (medium-confidence)	0	1	no viral genes detected
s18v1-PF_43443	1302	No	NA	3	0	3	Not-determined	Genome-fragment	NA	NA	0	1	no viral genes detected
s18v1-PF_43745	1143	No	NA	4	0	0	Low-quality	Genome-fragment	3.06	AAI-based (high-confidence)	0	1	no viral genes detected
s18v1-PF_43869	1027	No	NA	1	0	1	Not-determined	Genome-fragment	NA	NA	0	1	no viral genes detected
s18v1-PF_43913	1688	No	NA	2	2	0	Low-quality	Genome-fragment	2.14	AAI-based (high-confidence)	0	1
s18v1-PF_43969	1749	No	NA	2	0	1	Not-determined	Genome-fragment	NA	NA	0	1	no viral genes detected
s18v1-PF_44095	6763	No	NA	10	0	0	Low-quality	Genome-fragment	23.44	AAI-based (medium-confidence)	0	1	no viral genes detected
s18v1-PF_44117	1299	No	NA	2	0	0	Not-determined	Genome-fragment	NA	NA	0	1	no viral genes detected
s18v1-PF_44137	1930	No	NA	3	0	1	Not-determined	Genome-fragment	NA	NA	0	1	no viral genes detected
s18v1-PF_44158	1949	No	NA	4	0	2	Not-determined	Genome-fragment	NA	NA	0	1	no viral genes detected
s18v1-PF_44198	1771	No	NA	2	0	1	Not-determined	Genome-fragment	NA	NA	0	1	no viral genes detected
s18v1-PF_44201	1472	No	NA	1	0	1	Low-quality	Genome-fragment	4.29	AAI-based (high-confidence)	0	1	no viral genes detected
s18v1-PF_44213	13483	No	NA	10	3	0	Low-quality	Genome-fragment	12.53	AAI-based (high-confidence)	0	1
s18v1-PF_44254	1107	No	NA	2	0	1	Not-determined	Genome-fragment	NA	NA	0	1	no viral genes detected
s18v1-PF_44385	1352	No	NA	2	0	1	Not-determined	Genome-fragment	NA	NA	0	1	no viral genes detected
s18v1-PF_44443	1149	No	NA	2	0	1	Not-determined	Genome-fragment	NA	NA	0	1	no viral genes detected
s18v1-PF_44580	1234	No	NA	2	0	0	Not-determined	Genome-fragment	NA	NA	0	1	no viral genes detected
s18v1-PF_44598	1274	No	NA	3	0	0	Low-quality	Genome-fragment	1.37	AAI-based (medium-confidence)	0	1	no viral genes detected
s18v1-PF_44686	1047	No	NA	1	0	1	Not-determined	Genome-fragment	NA	NA	0	1	no viral genes detected
s18v1-PF_44885	12282	No	NA	19	7	0	Low-quality	Genome-fragment	29.47	AAI-based (high-confidence)	0	1
s18v1-PF_44943	1930	No	NA	2	0	1	Not-determined	Genome-fragment	NA	NA	0	1	no viral genes detected
s18v1-PF_44955	1366	No	NA	1	0	0	Not-determined	Genome-fragment	NA	NA	0	1	no viral genes detected
s18v1-PF_45022	3368	No	NA	6	0	1	Not-determined	Genome-fragment	NA	NA	0	1	no viral genes detected
s18v1-PF_45204	1252	No	NA	2	0	2	Not-determined	Genome-fragment	NA	NA	0	1	no viral genes detected
s18v1-PF_45318	9668	No	NA	12	6	0	Low-quality	Genome-fragment	17.7	AAI-based (high-confidence)	0	1
s18v1-PF_45323	1321	No	NA	3	0	3	Not-determined	Genome-fragment	NA	NA	0	1	no viral genes detected
s18v1-PF_45377	1321	No	NA	1	0	0	Not-determined	Genome-fragment	NA	NA	0	1	no viral genes detected
s18v1-PF_45547	1236	No	NA	1	0	1	Not-determined	Genome-fragment	NA	NA	0	1	no viral genes detected
s18v1-PF_45718	1714	No	NA	1	0	0	Low-quality	Genome-fragment	4.19	AAI-based (medium-confidence)	0	1	no viral genes detected
s18v1-PF_45733	1229	No	NA	1	0	1	Not-determined	Genome-fragment	NA	NA	0	1	no viral genes detected
s18v1-PF_45844	1073	No	NA	2	0	2	Not-determined	Genome-fragment	NA	NA	0	1	no viral genes detected
s18v1-PF_45872	3366	No	NA	3	0	3	Not-determined	Genome-fragment	NA	NA	0	1	no viral genes detected
s18v1-PF_45882	1379	No	NA	3	0	1	Not-determined	Genome-fragment	NA	NA	0	1	no viral genes detected
s18v1-PF_45925	1043	No	NA	2	0	1	Not-determined	Genome-fragment	NA	NA	0	1	no viral genes detected
s18v1-PF_46120	2393	No	NA	2	0	0	Not-determined	Genome-fragment	NA	NA	0	1	no viral genes detected
s18v1-PF_46134	5372	No	NA	9	2	0	Low-quality	Genome-fragment	12.52	AAI-based (high-confidence)	0	1
s18v1-PF_46315	3181	No	NA	2	0	0	Low-quality	Genome-fragment	4.54	AAI-based (high-confidence)	0	1	no viral genes detected
s18v1-PF_46319	1212	No	NA	1	0	1	Not-determined	Genome-fragment	NA	NA	0	1	no viral genes detected
s18v1-PF_46328	2135	No	NA	7	1	0	Low-quality	Genome-fragment	2.65	AAI-based (high-confidence)	0	1
s18v1-PF_46437	1202	No	NA	1	0	1	Not-determined	Genome-fragment	NA	NA	0	1	no viral genes detected
s18v1-PF_46454	1168	No	NA	1	0	1	Not-determined	Genome-fragment	NA	NA	0	1	no viral genes detected
s18v1-PF_46538	1448	No	NA	1	0	0	Not-determined	Genome-fragment	NA	NA	0	1	no viral genes detected
s18v1-PF_46695	5796	No	NA	3	0	2	Not-determined	Genome-fragment	NA	NA	0	1	no viral genes detected
s18v1-PF_46716	1345	No	NA	2	0	1	Not-determined	Genome-fragment	NA	NA	0	1	no viral genes detected
s18v1-PF_46804	1530	No	NA	2	0	2	Not-determined	Genome-fragment	NA	NA	0	1	no viral genes detected
s18v1-PF_46826	5710	No	NA	10	1	0	Low-quality	Genome-fragment	3.16	HMM-based (lower-bound)	0	1
s18v1-PF_46834	1067	No	NA	1	0	1	Not-determined	Genome-fragment	NA	NA	0	1	no viral genes detected
s18v1-PF_46842	7316	No	NA	8	0	6	Not-determined	Genome-fragment	NA	NA	0	1	no viral genes detected
s18v1-PF_46859	2141	No	NA	5	0	0	Low-quality	Genome-fragment	1.32	AAI-based (high-confidence)	0	1	no viral genes detected
s18v1-PF_47062	1783	No	NA	1	0	0	Not-determined	Genome-fragment	NA	NA	0	1	no viral genes detected
s18v1-PF_47105	1036	No	NA	2	0	0	Not-determined	Genome-fragment	NA	NA	0	1	no viral genes detected
s18v1-PF_47169	1350	No	NA	2	0	2	Not-determined	Genome-fragment	NA	NA	0	1	no viral genes detected
s18v1-PF_47351	18118	No	NA	26	8	0	Medium-quality	Genome-fragment	63.58	HMM-based (lower-bound)	0	1	low-confidence ITR
s18v1-PF_47576	1148	No	NA	2	0	1	Not-determined	Genome-fragment	NA	NA	0	1	no viral genes detected
s18v1-PF_48143	1155	No	NA	1	0	1	Not-determined	Genome-fragment	NA	NA	0	1	no viral genes detected
s18v1-PF_48177	1533	No	NA	1	0	1	Not-determined	Genome-fragment	NA	NA	0	1	no viral genes detected
s18v1-PF_48233	1059	No	NA	2	0	1	Not-determined	Genome-fragment	NA	NA	0	1	no viral genes detected
s18v1-PF_48304	1182	No	NA	3	0	0	Not-determined	Genome-fragment	NA	NA	0	1	no viral genes detected
s18v1-PF_48377	1866	No	NA	2	0	1	Not-determined	Genome-fragment	NA	NA	0	1	no viral genes detected
s18v1-PF_48427	1634	No	NA	2	0	0	Not-determined	Genome-fragment	NA	NA	0	1	no viral genes detected
s18v1-PF_48512	4617	No	NA	6	0	2	Not-determined	Genome-fragment	NA	NA	0	1	no viral genes detected
s18v1-PF_48786	1227	No	NA	1	0	1	Not-determined	Genome-fragment	NA	NA	0	1	no viral genes detected
s18v1-PF_48894	1579	No	NA	4	0	4	Not-determined	Genome-fragment	NA	NA	0	1	no viral genes detected
s18v1-PF_48976	1082	No	NA	2	0	0	Not-determined	Genome-fragment	NA	NA	0	1	no viral genes detected
s18v1-PF_48991	2713	No	NA	5	0	0	Not-determined	Genome-fragment	NA	NA	0	1	no viral genes detected
s18v1-PF_48999	5191	No	NA	7	0	3	Not-determined	Genome-fragment	NA	NA	0	1	no viral genes detected
s18v1-PF_49034	1309	No	NA	2	0	1	Not-determined	Genome-fragment	NA	NA	0	1	no viral genes detected
s18v1-PF_49049	1002	No	NA	1	0	0	Not-determined	Genome-fragment	NA	NA	0	1	no viral genes detected
s18v1-PF_49079	1037	No	NA	3	0	0	Low-quality	Genome-fragment	1.68	AAI-based (medium-confidence)	0	1	no viral genes detected
s18v1-PF_49083	1091	No	NA	3	0	0	Not-determined	Genome-fragment	NA	NA	0	1	no viral genes detected
s18v1-PF_49099	1367	No	NA	4	1	0	Low-quality	Genome-fragment	3.14	AAI-based (high-confidence)	0	1
s18v1-PF_49193	3410	No	NA	4	2	0	Low-quality	Genome-fragment	5.13	HMM-based (lower-bound)	0	1
s18v1-PF_49298	3337	No	NA	2	0	2	Not-determined	Genome-fragment	NA	NA	0	1	no viral genes detected
s18v1-PF_49364	1682	No	NA	2	0	2	Low-quality	Genome-fragment	1.13	AAI-based (medium-confidence)	0	1	no viral genes detected
s18v1-PF_49536	1396	No	NA	2	0	2	Not-determined	Genome-fragment	NA	NA	0	1	no viral genes detected
s18v1-PF_49657	1124	No	NA	2	0	1	Not-determined	Genome-fragment	NA	NA	0	1	no viral genes detected
s18v1-PF_49672	1202	No	NA	2	0	1	Not-determined	Genome-fragment	NA	NA	0	1	no viral genes detected
s18v1-PF_49684	2147	No	NA	2	0	0	Not-determined	Genome-fragment	NA	NA	0	1	no viral genes detected
s18v1-PF_49716	1470	No	NA	1	0	1	Not-determined	Genome-fragment	NA	NA	0	1	no viral genes detected
s18v1-PF_49800	3813	No	NA	5	0	4	Not-determined	Genome-fragment	NA	NA	0	1	no viral genes detected
s18v1-PF_49819	2644	No	NA	1	0	0	Low-quality	Genome-fragment	5.95	AAI-based (medium-confidence)	0	1	no viral genes detected
s18v1-PF_49831	22910	No	NA	31	15	0	Low-quality	Genome-fragment	37.22	AAI-based (high-confidence)	0	1
s18v1-PF_49897	3483	No	NA	3	0	3	Not-determined	Genome-fragment	NA	NA	0	1	no viral genes detected
s18v1-PF_49923	1898	No	NA	1	0	0	Not-determined	Genome-fragment	NA	NA	0	1	no viral genes detected
s18v1-PF_50019	1197	No	NA	1	0	1	Not-determined	Genome-fragment	NA	NA	0	1	no viral genes detected
s18v1-PF_50038	1092	No	NA	2	0	0	Not-determined	Genome-fragment	NA	NA	0	1	no viral genes detected
s18v1-PF_50074	3013	No	NA	3	0	3	Not-determined	Genome-fragment	NA	NA	0	1	no viral genes detected
s18v1-PF_50115	1040	No	NA	1	0	0	Low-quality	Genome-fragment	2.6	AAI-based (high-confidence)	0	1	no viral genes detected
s18v1-PF_50221	5680	No	NA	5	0	2	Not-determined	Genome-fragment	NA	NA	0	1	no viral genes detected
s18v1-PF_50260	2583	No	NA	3	0	3	Not-determined	Genome-fragment	NA	NA	0	1	no viral genes detected
s18v1-PF_50305	1080	No	NA	2	0	2	Not-determined	Genome-fragment	NA	NA	0	1	no viral genes detected
s18v1-PF_50323	2007	No	NA	3	0	1	Not-determined	Genome-fragment	NA	NA	0	1	no viral genes detected
s18v1-PF_50325	2083	No	NA	1	0	0	Not-determined	Genome-fragment	NA	NA	0	1	no viral genes detected
s18v1-PF_50375	1004	No	NA	2	0	0	Not-determined	Genome-fragment	NA	NA	0	1	no viral genes detected
s18v1-PF_50387	1223	No	NA	1	0	1	Not-determined	Genome-fragment	NA	NA	0	1	no viral genes detected
s18v1-PF_50470	1885	No	NA	4	0	2	Not-determined	Genome-fragment	NA	NA	0	1	no viral genes detected
s18v1-PF_50519	1133	No	NA	2	0	0	Not-determined	Genome-fragment	NA	NA	0	1	no viral genes detected
s18v1-PF_50545	1269	No	NA	2	0	2	Not-determined	Genome-fragment	NA	NA	0	1	no viral genes detected
s18v1-PF_50623	28872	No	NA	36	17	0	Low-quality	Genome-fragment	47.57	AAI-based (high-confidence)	0	1
s18v1-PF_50653	1001	No	NA	1	0	0	Not-determined	Genome-fragment	NA	NA	0	1	no viral genes detected
s18v1-PF_50690	2741	No	NA	2	0	2	Not-determined	Genome-fragment	NA	NA	0	1	no viral genes detected
s18v1-PF_50875	2749	No	NA	2	0	0	Low-quality	Genome-fragment	1.07	AAI-based (high-confidence)	0	1	no viral genes detected
s18v1-PF_50942	1239	No	NA	1	0	1	Not-determined	Genome-fragment	NA	NA	0	1	no viral genes detected
s18v1-PF_50963	1120	No	NA	1	0	1	Not-determined	Genome-fragment	NA	NA	0	1	no viral genes detected
s18v1-PF_50966	1017	No	NA	1	0	1	Not-determined	Genome-fragment	NA	NA	0	1	no viral genes detected
s18v1-PF_51120	1051	No	NA	2	0	0	Not-determined	Genome-fragment	NA	NA	0	1	no viral genes detected
s18v1-PF_51180	1113	No	NA	1	0	1	Not-determined	Genome-fragment	NA	NA	0	1	no viral genes detected
s18v1-PF_51181	3294	No	NA	6	0	0	Not-determined	Genome-fragment	NA	NA	0	1	no viral genes detected
s18v1-PF_51295	3010	No	NA	4	0	2	Not-determined	Genome-fragment	NA	NA	0	1	no viral genes detected
s18v1-PF_51307	1122	No	NA	2	0	0	Not-determined	Genome-fragment	NA	NA	0	1	no viral genes detected
s18v1-PF_51325	1096	No	NA	1	0	1	Not-determined	Genome-fragment	NA	NA	0	1	no viral genes detected
s18v1-PF_51390	1164	No	NA	1	1	0	Low-quality	Genome-fragment	0.5	HMM-based (lower-bound)	0	1
s18v1-PF_51405	1102	No	NA	2	0	1	Low-quality	Genome-fragment	0.43	AAI-based (medium-confidence)	0	1	no viral genes detected
s18v1-PF_51461	1086	No	NA	2	0	1	Not-determined	Genome-fragment	NA	NA	0	1	no viral genes detected
s18v1-PF_51565	1048	No	NA	3	0	1	Not-determined	Genome-fragment	NA	NA	0	1	no viral genes detected
s18v1-PF_51608	1428	No	NA	1	0	1	Not-determined	Genome-fragment	NA	NA	0	1	no viral genes detected
s18v1-PF_51698	2235	No	NA	3	0	2	Not-determined	Genome-fragment	NA	NA	0	1	no viral genes detected
s18v1-PF_51704	3360	No	NA	5	0	2	Not-determined	Genome-fragment	NA	NA	0	1	no viral genes detected
s18v1-PF_51738	1013	No	NA	1	0	1	Not-determined	Genome-fragment	NA	NA	0	1	no viral genes detected
s18v1-PF_51747	1241	No	NA	2	0	1	Not-determined	Genome-fragment	NA	NA	0	1	no viral genes detected
s18v1-PF_51875	3458	No	NA	4	0	1	Not-determined	Genome-fragment	NA	NA	0	1	no viral genes detected
s18v1-PF_51914	8101	No	NA	18	0	0	Low-quality	Genome-fragment	7.45	AAI-based (high-confidence)	0	1	no viral genes detected
s18v1-PF_51963	1737	No	NA	2	0	1	Not-determined	Genome-fragment	NA	NA	0	1	no viral genes detected
s18v1-PF_52028	3934	No	NA	7	0	0	Not-determined	Genome-fragment	NA	NA	0	1	no viral genes detected
s18v1-PF_52068	3379	No	NA	3	0	2	Not-determined	Genome-fragment	NA	NA	0	1	no viral genes detected
s18v1-PF_52463	15341	No	NA	19	3	0	Low-quality	Genome-fragment	25.28	AAI-based (high-confidence)	0	1
s18v1-PF_52601	1328	No	NA	2	0	2	Not-determined	Genome-fragment	NA	NA	0	1	no viral genes detected
s18v1-PF_52667	1295	No	NA	2	0	0	Not-determined	Genome-fragment	NA	NA	0	1	no viral genes detected
s18v1-PF_52710	1097	No	NA	2	0	1	Not-determined	Genome-fragment	NA	NA	0	1	no viral genes detected
s18v1-PF_52741	1328	No	NA	1	0	1	Not-determined	Genome-fragment	NA	NA	0	1	no viral genes detected
s18v1-PF_53129	1082	No	NA	1	0	1	Not-determined	Genome-fragment	NA	NA	0	1	no viral genes detected
s18v1-PF_53149	1517	No	NA	1	0	1	Not-determined	Genome-fragment	NA	NA	0	1	no viral genes detected
s18v1-PF_53263	1044	No	NA	1	0	0	Not-determined	Genome-fragment	NA	NA	0	1	no viral genes detected
s18v1-PF_53308	1006	No	NA	1	0	0	Not-determined	Genome-fragment	NA	NA	0	1	no viral genes detected
s18v1-PF_53355	1512	No	NA	2	0	1	Not-determined	Genome-fragment	NA	NA	0	1	no viral genes detected
s18v1-PF_53390	1796	No	NA	2	1	0	Low-quality	Genome-fragment	0.97	AAI-based (high-confidence)	0	1
s18v1-PF_53393	4122	No	NA	4	0	2	Not-determined	Genome-fragment	NA	NA	0	1	no viral genes detected
s18v1-PF_53569	1076	No	NA	2	0	0	Not-determined	Genome-fragment	NA	NA	0	1	no viral genes detected
s18v1-PF_53641	5290	No	NA	3	0	2	Low-quality	Genome-fragment	0.49	AAI-based (medium-confidence)	0	1	no viral genes detected
s18v1-PF_53675	1099	No	NA	2	0	2	Not-determined	Genome-fragment	NA	NA	0	1	no viral genes detected
s18v1-PF_53824	3345	No	NA	6	0	0	Not-determined	Genome-fragment	NA	NA	0	1	no viral genes detected
s18v1-PF_53860	1113	No	NA	3	0	2	Not-determined	Genome-fragment	NA	NA	0	1	no viral genes detected
s18v1-PF_53955	1023	No	NA	2	0	1	Not-determined	Genome-fragment	NA	NA	0	1	no viral genes detected
s18v1-PF_53993	1367	No	NA	1	0	1	Not-determined	Genome-fragment	NA	NA	0	1	no viral genes detected
s18v1-PF_54007	1215	No	NA	1	0	1	Not-determined	Genome-fragment	NA	NA	0	1	no viral genes detected
s18v1-PF_54073	1136	No	NA	2	0	0	Not-determined	Genome-fragment	NA	NA	0	1	no viral genes detected
s18v1-PF_54103	4142	No	NA	6	0	1	Not-determined	Genome-fragment	NA	NA	0	1	no viral genes detected
s18v1-PF_54108	1425	No	NA	2	0	1	Not-determined	Genome-fragment	NA	NA	0	1	no viral genes detected
s18v1-PF_54177	1918	No	NA	2	0	2	Not-determined	Genome-fragment	NA	NA	0	1	no viral genes detected
s18v1-PF_54190	2372	No	NA	6	0	0	Not-determined	Genome-fragment	NA	NA	0	1	no viral genes detected
s18v1-PF_54215	1687	No	NA	4	0	0	Not-determined	Genome-fragment	NA	NA	0	1.05	no viral genes detected
s18v1-PF_54226	5780	No	NA	4	0	2	Not-determined	Genome-fragment	NA	NA	0	1	no viral genes detected
s18v1-PF_54288	3151	No	NA	3	0	2	Not-determined	Genome-fragment	NA	NA	0	1	no viral genes detected
s18v1-PF_54297	1027	No	NA	2	0	2	Low-quality	Genome-fragment	0.63	AAI-based (medium-confidence)	0	1	no viral genes detected
s18v1-PF_54310	1561	No	NA	2	0	0	Low-quality	Genome-fragment	3.11	AAI-based (high-confidence)	0	1	no viral genes detected
s18v1-PF_54336	1156	No	NA	4	0	0	Not-determined	Genome-fragment	NA	NA	0	1	no viral genes detected
s18v1-PF_54342	3399	No	NA	2	0	0	Not-determined	Genome-fragment	NA	NA	0	1	no viral genes detected
s18v1-PF_54437	5177	No	NA	13	2	0	Low-quality	Genome-fragment	12.19	AAI-based (high-confidence)	0	1
s18v1-PF_54474	1495	No	NA	2	0	2	Not-determined	Genome-fragment	NA	NA	0	1	no viral genes detected
s18v1-PF_54570	3779	No	NA	3	0	2	Not-determined	Genome-fragment	NA	NA	0	1	no viral genes detected
s18v1-PF_54575	1173	No	NA	1	0	1	Not-determined	Genome-fragment	NA	NA	0	1	no viral genes detected
s18v1-PF_54646	1050	No	NA	1	0	1	Not-determined	Genome-fragment	NA	NA	0	1	no viral genes detected
s18v1-PF_54782	3681	No	NA	8	1	0	Low-quality	Genome-fragment	12.61	HMM-based (lower-bound)	0	1
s18v1-PF_54859	1405	No	NA	4	0	1	Not-determined	Genome-fragment	NA	NA	0	1	no viral genes detected
s18v1-PF_54870	1017	No	NA	2	0	1	Not-determined	Genome-fragment	NA	NA	0	1	no viral genes detected
s18v1-PF_54929	1027	No	NA	2	0	2	Not-determined	Genome-fragment	NA	NA	0	1	no viral genes detected
s18v1-PF_54996	1211	No	NA	2	0	0	Not-determined	Genome-fragment	NA	NA	0	1	no viral genes detected
s18v1-PF_55207	1016	No	NA	2	0	2	Not-determined	Genome-fragment	NA	NA	0	1	no viral genes detected
s18v1-PF_55308	1868	No	NA	3	0	0	Low-quality	Genome-fragment	0.57	AAI-based (medium-confidence)	0	1	no viral genes detected
s18v1-PF_55348	1427	No	NA	1	0	1	Not-determined	Genome-fragment	NA	NA	0	1	no viral genes detected
s18v1-PF_55546	3072	No	NA	4	0	3	Low-quality	Genome-fragment	0.9	AAI-based (medium-confidence)	0	1	no viral genes detected
s18v1-PF_55592	1109	No	NA	2	0	0	Not-determined	Genome-fragment	NA	NA	0	1	no viral genes detected
s18v1-PF_55637	1026	No	NA	2	0	1	Not-determined	Genome-fragment	NA	NA	0	1	no viral genes detected
s18v1-PF_56034	3364	No	NA	4	0	0	Not-determined	Genome-fragment	NA	NA	0	1	no viral genes detected
s18v1-PF_56068	1003	No	NA	1	0	0	Not-determined	Genome-fragment	NA	NA	0	1	no viral genes detected
s18v1-PF_56082	1195	No	NA	2	0	1	Not-determined	Genome-fragment	NA	NA	0	1	no viral genes detected
s18v1-PF_56267	1582	No	NA	3	1	0	Low-quality	Genome-fragment	5.36	HMM-based (lower-bound)	0	1
s18v1-PF_56435	1415	No	NA	4	0	0	Low-quality	Genome-fragment	1.83	AAI-based (medium-confidence)	0	1	no viral genes detected
s18v1-PF_56440	1575	No	NA	3	1	0	Low-quality	Genome-fragment	1.82	HMM-based (lower-bound)	0	1
s18v1-PF_56444	3794	No	NA	5	0	1	Not-determined	Genome-fragment	NA	NA	0	1	no viral genes detected
s18v1-PF_56491	2057	No	NA	2	0	1	Not-determined	Genome-fragment	NA	NA	0	1	no viral genes detected
s18v1-PF_56499	1402	No	NA	3	1	0	Low-quality	Genome-fragment	2.12	AAI-based (high-confidence)	0	1
s18v1-PF_56625	1479	No	NA	1	0	1	Not-determined	Genome-fragment	NA	NA	0	1	no viral genes detected
s18v1-PF_56774	1452	No	NA	2	0	1	Not-determined	Genome-fragment	NA	NA	0	1	no viral genes detected
s18v1-PF_56830	1293	No	NA	1	0	1	Not-determined	Genome-fragment	NA	NA	0	1	no viral genes detected
s18v1-PF_56855	1314	No	NA	2	0	0	Not-determined	Genome-fragment	NA	NA	0	1	no viral genes detected
s18v1-PF_56922	4673	No	NA	5	0	3	Not-determined	Genome-fragment	NA	NA	0	1	no viral genes detected
s18v1-PF_56987	1269	No	NA	2	0	2	Not-determined	Genome-fragment	NA	NA	0	1	no viral genes detected
s18v1-PF_57061	2339	No	NA	1	0	0	Low-quality	Genome-fragment	1.83	AAI-based (medium-confidence)	0	1	no viral genes detected
s18v1-PF_57252	3761	No	NA	5	0	3	Not-determined	Genome-fragment	NA	NA	0	1	no viral genes detected
s18v1-PF_57314	1591	No	NA	3	0	0	Not-determined	Genome-fragment	NA	NA	0	1.05	no viral genes detected
s18v1-PF_57501	2227	No	NA	4	0	0	Low-quality	Genome-fragment	3.97	AAI-based (medium-confidence)	0	1	no viral genes detected
s18v1-PF_57586	1066	No	NA	1	0	0	Not-determined	Genome-fragment	NA	NA	0	1	no viral genes detected
s18v1-PF_57684	1613	No	NA	2	0	2	Not-determined	Genome-fragment	NA	NA	0	1	no viral genes detected
s18v1-PF_57719	1476	No	NA	1	0	1	Not-determined	Genome-fragment	NA	NA	0	1	no viral genes detected
s18v1-PF_57803	1344	No	NA	1	0	1	Not-determined	Genome-fragment	NA	NA	0	1	no viral genes detected
s18v1-PF_57868	1574	No	NA	1	0	1	Not-determined	Genome-fragment	NA	NA	0	1	no viral genes detected
s18v1-PF_57980	3259	No	NA	6	0	3	Not-determined	Genome-fragment	NA	NA	0	1	no viral genes detected
s18v1-PF_58115	1822	No	NA	3	0	1	Not-determined	Genome-fragment	NA	NA	0	1	no viral genes detected
s18v1-PF_58184	1040	No	NA	1	0	0	Not-determined	Genome-fragment	NA	NA	0	1	no viral genes detected
s18v1-PF_58194	1039	No	NA	1	0	1	Not-determined	Genome-fragment	NA	NA	0	1	no viral genes detected
s18v1-PF_58459	1994	No	NA	3	0	2	Not-determined	Genome-fragment	NA	NA	0	1	no viral genes detected
s18v1-PF_58483	1172	No	NA	1	0	1	Not-determined	Genome-fragment	NA	NA	0	1	no viral genes detected
s18v1-PF_58490	2128	No	NA	5	0	5	Not-determined	Genome-fragment	NA	NA	0	1	no viral genes detected
s18v1-PF_58505	3363	No	NA	2	0	1	Not-determined	Genome-fragment	NA	NA	0	1	no viral genes detected
s18v1-PF_58551	3186	No	NA	5	0	0	Not-determined	Genome-fragment	NA	NA	0	1	no viral genes detected
s18v1-PF_58582	1399	No	NA	3	0	1	Not-determined	Genome-fragment	NA	NA	0	1	no viral genes detected
s18v1-PF_58751	1019	No	NA	1	0	0	Not-determined	Genome-fragment	NA	NA	0	1	no viral genes detected
s18v1-PF_58888	1571	No	NA	2	0	2	Not-determined	Genome-fragment	NA	NA	0	1	no viral genes detected
s18v1-PF_58969	2289	No	NA	5	0	0	Low-quality	Genome-fragment	1.42	AAI-based (medium-confidence)	0	1	no viral genes detected
s18v1-PF_58978	1591	No	NA	3	0	0	Not-determined	Genome-fragment	NA	NA	0	1	no viral genes detected
s18v1-PF_59071	5702	No	NA	7	0	4	Not-determined	Genome-fragment	NA	NA	0	1	no viral genes detected
s18v1-PF_59183	2256	No	NA	1	0	0	Not-determined	Genome-fragment	NA	NA	0	1	no viral genes detected
s18v1-PF_59242	1737	No	NA	1	0	1	Not-determined	Genome-fragment	NA	NA	0	1	no viral genes detected
s18v1-PF_59251	1124	No	NA	2	0	1	Not-determined	Genome-fragment	NA	NA	0	1	no viral genes detected
s18v1-PF_59297	1202	No	NA	1	0	1	Not-determined	Genome-fragment	NA	NA	0	1	no viral genes detected
s18v1-PF_59413	1345	No	NA	1	1	0	Low-quality	Genome-fragment	0.11	HMM-based (lower-bound)	0	1
s18v1-PF_59483	12657	No	NA	13	4	1	Low-quality	Genome-fragment	31.4	AAI-based (high-confidence)	0	1
s18v1-PF_59499	1552	No	NA	3	0	1	Not-determined	Genome-fragment	NA	NA	0	1	no viral genes detected
s18v1-PF_59503	2313	No	NA	2	0	1	Not-determined	Genome-fragment	NA	NA	0	1	no viral genes detected
s18v1-PF_59524	10642	No	NA	13	0	3	Low-quality	Genome-fragment	11.11	AAI-based (medium-confidence)	0	1	no viral genes detected
s18v1-PF_59580	1701	No	NA	4	0	3	Not-determined	Genome-fragment	NA	NA	0	1	no viral genes detected
s18v1-PF_59624	1704	No	NA	4	0	3	Not-determined	Genome-fragment	NA	NA	0	1	no viral genes detected
s18v1-PF_59800	1319	No	NA	2	0	1	Not-determined	Genome-fragment	NA	NA	0	1	no viral genes detected
s18v1-PF_60094	1183	No	NA	1	0	1	Not-determined	Genome-fragment	NA	NA	0	1	no viral genes detected
s18v1-PF_60351	1494	No	NA	2	0	2	Not-determined	Genome-fragment	NA	NA	0	1	no viral genes detected
s18v1-PF_60353	1962	No	NA	2	0	1	Not-determined	Genome-fragment	NA	NA	0	1	no viral genes detected
s18v1-PF_60390	1565	No	NA	3	0	2	Not-determined	Genome-fragment	NA	NA	0	1	no viral genes detected
s18v1-PF_60574	1586	No	NA	5	0	0	Low-quality	Genome-fragment	2.71	AAI-based (medium-confidence)	0	1	no viral genes detected
s18v1-PF_60603	2573	No	NA	3	0	2	Not-determined	Genome-fragment	NA	NA	0	1	no viral genes detected
s18v1-PF_60622	1047	No	NA	1	0	0	Not-determined	Genome-fragment	NA	NA	0	1	no viral genes detected
s18v1-PF_60821	1827	No	NA	2	0	1	Low-quality	Genome-fragment	4.79	AAI-based (high-confidence)	0	1	no viral genes detected
s18v1-PF_60842	1123	No	NA	2	0	2	Not-determined	Genome-fragment	NA	NA	0	1	no viral genes detected
s18v1-PF_60893	6191	No	NA	6	0	3	Low-quality	Genome-fragment	9.7	AAI-based (high-confidence)	0	1	no viral genes detected
s18v1-PF_60922	1184	No	NA	1	0	1	Not-determined	Genome-fragment	NA	NA	0	1	no viral genes detected
s18v1-PF_61237	1113	No	NA	2	0	1	Not-determined	Genome-fragment	NA	NA	0	1	no viral genes detected
s18v1-PF_61261	1024	No	NA	2	0	0	Not-determined	Genome-fragment	NA	NA	0	1	no viral genes detected
s18v1-PF_61364	1231	No	NA	2	0	0	Not-determined	Genome-fragment	NA	NA	0	1	no viral genes detected
s18v1-PF_61437	1732	No	NA	1	0	0	Not-determined	Genome-fragment	NA	NA	0	1	no viral genes detected
s18v1-PF_61635	1263	No	NA	1	0	1	Not-determined	Genome-fragment	NA	NA	0	1	no viral genes detected
s18v1-PF_61762	1499	No	NA	3	0	2	Not-determined	Genome-fragment	NA	NA	0	1	no viral genes detected
s18v1-PF_62052	1444	No	NA	1	0	1	Low-quality	Genome-fragment	0.6	AAI-based (medium-confidence)	0	1	no viral genes detected
s18v1-PF_62080	1963	No	NA	7	0	0	Low-quality	Genome-fragment	1.22	AAI-based (high-confidence)	0	1	no viral genes detected
s18v1-PF_62199	1327	No	NA	4	0	0	Not-determined	Genome-fragment	NA	NA	0	1	no viral genes detected
s18v1-PF_62317	4653	No	NA	6	0	2	Not-determined	Genome-fragment	NA	NA	0	1	no viral genes detected
s18v1-PF_62439	1871	No	NA	3	0	3	Not-determined	Genome-fragment	NA	NA	0	1	no viral genes detected
s18v1-PF_62478	1252	No	NA	2	0	2	Not-determined	Genome-fragment	NA	NA	0	1	no viral genes detected
s18v1-PF_62584	2077	No	NA	3	0	1	Not-determined	Genome-fragment	NA	NA	0	1	no viral genes detected
s18v1-PF_62905	2001	No	NA	2	0	1	Not-determined	Genome-fragment	NA	NA	0	1	no viral genes detected
s18v1-PF_62915	1736	No	NA	2	0	1	Not-determined	Genome-fragment	NA	NA	0	1	no viral genes detected
s18v1-PF_62952	1960	No	NA	1	0	1	Not-determined	Genome-fragment	NA	NA	0	1	no viral genes detected
s18v1-PF_62994	1074	No	NA	2	0	0	Not-determined	Genome-fragment	NA	NA	0	1	no viral genes detected
s18v1-PF_63002	1129	No	NA	3	0	0	Not-determined	Genome-fragment	NA	NA	0	1	no viral genes detected
s18v1-PF_63150	2054	No	NA	3	0	1	Not-determined	Genome-fragment	NA	NA	0	1	no viral genes detected
s18v1-PF_63151	2268	No	NA	4	0	0	Not-determined	Genome-fragment	NA	NA	0	1	no viral genes detected
s18v1-PF_63166	1417	No	NA	2	0	1	Not-determined	Genome-fragment	NA	NA	0	1	no viral genes detected
s18v1-PF_63256	1342	No	NA	1	0	0	Not-determined	Genome-fragment	NA	NA	0	1	no viral genes detected
s18v1-PF_63281	1183	No	NA	1	0	1	Not-determined	Genome-fragment	NA	NA	0	1	no viral genes detected
s18v1-PF_63291	3997	No	NA	4	0	4	Not-determined	Genome-fragment	NA	NA	0	1	no viral genes detected
s18v1-PF_63381	2666	No	NA	4	0	2	Low-quality	Genome-fragment	5.96	AAI-based (medium-confidence)	0	1	no viral genes detected
s18v1-PF_63414	1196	No	NA	1	0	1	Not-determined	Genome-fragment	NA	NA	0	1	no viral genes detected
s18v1-PF_63451	1186	No	NA	2	0	1	Not-determined	Genome-fragment	NA	NA	0	1	no viral genes detected
s18v1-PF_63512	1005	No	NA	2	0	1	Low-quality	Genome-fragment	1.4	AAI-based (medium-confidence)	0	1	no viral genes detected
s18v1-PF_63570	1337	No	NA	3	0	0	Low-quality	Genome-fragment	2.59	AAI-based (high-confidence)	0	1	no viral genes detected
s18v1-PF_63593	1396	No	NA	2	0	1	Not-determined	Genome-fragment	NA	NA	0	1	no viral genes detected
s18v1-PF_63663	3212	No	NA	4	1	0	Low-quality	Genome-fragment	4.14	AAI-based (medium-confidence)	0	1
s18v1-PF_63798	1512	No	NA	1	0	0	Not-determined	Genome-fragment	NA	NA	0	1	no viral genes detected
s18v1-PF_63843	1041	No	NA	1	0	0	Not-determined	Genome-fragment	NA	NA	0	1	no viral genes detected
s18v1-PF_63994	43542	No	NA	51	28	0	High-quality	High-quality	100	AAI-based (high-confidence)	0	1
s18v1-PF_64058	1138	No	NA	1	0	0	Not-determined	Genome-fragment	NA	NA	0	1	no viral genes detected
s18v1-PF_64092	1091	No	NA	1	0	1	Low-quality	Genome-fragment	0.18	AAI-based (high-confidence)	0	1	no viral genes detected
s18v1-PF_64143	1076	No	NA	2	0	2	Not-determined	Genome-fragment	NA	NA	0	1	no viral genes detected
s18v1-PF_64191	1404	No	NA	1	0	1	Not-determined	Genome-fragment	NA	NA	0	1	no viral genes detected
s18v1-PF_64294	1287	No	NA	2	0	0	Not-determined	Genome-fragment	NA	NA	0	1	no viral genes detected
s18v1-PF_64315	1446	No	NA	2	0	1	Not-determined	Genome-fragment	NA	NA	0	1	no viral genes detected
s18v1-PF_64385	1132	No	NA	2	0	1	Not-determined	Genome-fragment	NA	NA	0	1	no viral genes detected
s18v1-PF_64490	6974	No	NA	10	0	2	Low-quality	Genome-fragment	7.28	AAI-based (medium-confidence)	0	1	no viral genes detected
s18v1-PF_64563	3330	No	NA	4	0	2	Low-quality	Genome-fragment	7.69	AAI-based (medium-confidence)	0	1	no viral genes detected
s18v1-PF_64645	1535	No	NA	1	0	1	Not-determined	Genome-fragment	NA	NA	0	1	no viral genes detected
s18v1-PF_64665	1098	No	NA	2	0	1	Not-determined	Genome-fragment	NA	NA	0	1	no viral genes detected
s18v1-PF_64688	1543	No	NA	3	0	0	Not-determined	Genome-fragment	NA	NA	0	1	no viral genes detected
s18v1-PF_64730	1124	No	NA	2	0	1	Not-determined	Genome-fragment	NA	NA	0	1	no viral genes detected
s18v1-PF_64837	2183	No	NA	1	0	1	Not-determined	Genome-fragment	NA	NA	0	1	no viral genes detected
s18v1-PF_64908	1915	No	NA	1	0	1	Not-determined	Genome-fragment	NA	NA	0	1	no viral genes detected
s18v1-PF_65129	2077	No	NA	1	0	1	Not-determined	Genome-fragment	NA	NA	0	1	no viral genes detected
s18v1-PF_65159	4296	No	NA	4	0	2	Not-determined	Genome-fragment	NA	NA	0	1	no viral genes detected
s18v1-PF_65314	1055	No	NA	2	0	0	Low-quality	Genome-fragment	0.54	AAI-based (high-confidence)	0	1	no viral genes detected
s18v1-PF_65376	1636	No	NA	1	0	0	Low-quality	Genome-fragment	2.73	AAI-based (high-confidence)	0	1	no viral genes detected
s18v1-PF_65531	2440	No	NA	3	0	2	Not-determined	Genome-fragment	NA	NA	0	1	no viral genes detected
s18v1-PF_65549	1216	No	NA	1	0	0	Not-determined	Genome-fragment	NA	NA	0	1	no viral genes detected
s18v1-PF_65659	1632	No	NA	2	0	1	Not-determined	Genome-fragment	NA	NA	0	1	no viral genes detected
s18v1-PF_65695	1081	No	NA	1	0	0	Not-determined	Genome-fragment	NA	NA	0	1	no viral genes detected
s18v1-PF_65709	6643	No	NA	11	3	0	Low-quality	Genome-fragment	12.42	AAI-based (high-confidence)	0	1
s18v1-PF_65781	1156	No	NA	2	0	1	Not-determined	Genome-fragment	NA	NA	0	1	no viral genes detected
s18v1-PF_65894	2393	No	NA	3	0	1	Not-determined	Genome-fragment	NA	NA	0	1	no viral genes detected
s18v1-PF_65938	2069	No	NA	2	0	2	Not-determined	Genome-fragment	NA	NA	0	1	no viral genes detected
s18v1-PF_66087	1254	No	NA	1	0	1	Not-determined	Genome-fragment	NA	NA	0	1	no viral genes detected
s18v1-PF_66139	4492	No	NA	5	0	0	Not-determined	Genome-fragment	NA	NA	0	1	no viral genes detected
s18v1-PF_66144	4109	No	NA	4	0	1	Not-determined	Genome-fragment	NA	NA	0	1	no viral genes detected
s18v1-PF_66148	1437	No	NA	2	0	1	Not-determined	Genome-fragment	NA	NA	0	1	no viral genes detected
s18v1-PF_66426	1647	No	NA	2	0	2	Low-quality	Genome-fragment	0.97	AAI-based (medium-confidence)	0	1	no viral genes detected
s18v1-PF_66431	2225	No	NA	3	0	0	Not-determined	Genome-fragment	NA	NA	0	1	no viral genes detected
s18v1-PF_66511	1692	No	NA	3	1	0	Low-quality	Genome-fragment	26.52	AAI-based (medium-confidence)	0	1
s18v1-PF_66552	1254	No	NA	2	0	0	Not-determined	Genome-fragment	NA	NA	0	1	no viral genes detected
s18v1-PF_66607	3443	No	NA	3	0	0	Not-determined	Genome-fragment	NA	NA	0	1	no viral genes detected
s18v1-PF_66807	4532	No	NA	3	0	3	Not-determined	Genome-fragment	NA	NA	0	1	no viral genes detected
s18v1-PF_66884	3251	No	NA	2	0	2	Not-determined	Genome-fragment	NA	NA	0	1	no viral genes detected
s18v1-PF_66949	1759	No	NA	2	0	0	Not-determined	Genome-fragment	NA	NA	0	1	no viral genes detected
s18v1-PF_66974	3047	No	NA	3	0	0	Not-determined	Genome-fragment	NA	NA	0	1	no viral genes detected
s18v1-PF_66976	1344	No	NA	2	0	0	Not-determined	Genome-fragment	NA	NA	0	1.1	no viral genes detected; low-confidence DTR
s18v1-PF_66998	1228	No	NA	2	0	2	Not-determined	Genome-fragment	NA	NA	0	1	no viral genes detected
s18v1-PF_67136	1080	No	NA	1	0	0	Not-determined	Genome-fragment	NA	NA	0	1	no viral genes detected
s18v1-PF_67502	2633	No	NA	5	0	0	Low-quality	Genome-fragment	1.64	AAI-based (high-confidence)	0	1	no viral genes detected
s18v1-PF_67552	1073	No	NA	2	0	0	Not-determined	Genome-fragment	NA	NA	0	1	no viral genes detected
s18v1-PF_67586	1197	No	NA	2	0	0	Not-determined	Genome-fragment	NA	NA	0	1	no viral genes detected
s18v1-PF_67714	49481	No	NA	73	21	0	High-quality	High-quality	100	AAI-based (high-confidence)	0	1
s18v1-PF_67802	1321	No	NA	4	0	1	Not-determined	Genome-fragment	NA	NA	0	1	no viral genes detected
s18v1-PF_67891	3668	No	NA	2	0	2	Not-determined	Genome-fragment	NA	NA	0	1	no viral genes detected
s18v1-PF_67988	1454	No	NA	2	0	1	Not-determined	Genome-fragment	NA	NA	0	1	no viral genes detected
s18v1-PF_68065	1067	No	NA	2	0	1	Not-determined	Genome-fragment	NA	NA	0	1	no viral genes detected
s18v1-PF_68399	1112	No	NA	2	0	0	Not-determined	Genome-fragment	NA	NA	0	1	no viral genes detected
s18v1-PF_68440	1612	No	NA	1	0	1	Not-determined	Genome-fragment	NA	NA	0	1	no viral genes detected
s18v1-PF_68683	1130	No	NA	1	0	1	Not-determined	Genome-fragment	NA	NA	0	1	no viral genes detected
s18v1-PF_68687	1102	No	NA	2	0	0	Low-quality	Genome-fragment	0.96	AAI-based (high-confidence)	0	1	no viral genes detected
s18v1-PF_68732	1174	No	NA	3	0	1	Not-determined	Genome-fragment	NA	NA	0	1	no viral genes detected
s18v1-PF_68738	2527	No	NA	2	0	0	Not-determined	Genome-fragment	NA	NA	0	1	no viral genes detected
s18v1-PF_68913	1015	No	NA	3	0	0	Low-quality	Genome-fragment	2.48	AAI-based (high-confidence)	0	1	no viral genes detected
s18v1-PF_69001	5206	No	NA	6	0	1	Low-quality	Genome-fragment	10.02	AAI-based (medium-confidence)	0	1	no viral genes detected
s18v1-PF_69158	1206	No	NA	1	0	0	Not-determined	Genome-fragment	NA	NA	0	1	no viral genes detected
s18v1-PF_69203	1107	No	NA	2	0	2	Not-determined	Genome-fragment	NA	NA	0	1	no viral genes detected
s18v1-PF_69405	1661	No	NA	3	0	1	Not-determined	Genome-fragment	NA	NA	0	1	no viral genes detected
s18v1-PF_69615	4910	No	NA	4	0	1	Not-determined	Genome-fragment	NA	NA	0	1	no viral genes detected
s18v1-PF_69899	2233	No	NA	3	0	2	Not-determined	Genome-fragment	NA	NA	0	1	no viral genes detected
s18v1-PF_70149	1656	No	NA	1	0	0	Not-determined	Genome-fragment	NA	NA	0	1	no viral genes detected
s18v1-PF_70177	1006	No	NA	1	0	0	Not-determined	Genome-fragment	NA	NA	0	1	no viral genes detected
s18v1-PF_70207	1832	No	NA	4	0	3	Not-determined	Genome-fragment	NA	NA	0	1	no viral genes detected
s18v1-PF_70212	1132	No	NA	2	0	1	Not-determined	Genome-fragment	NA	NA	0	1	no viral genes detected
s18v1-PF_70300	1174	No	NA	2	0	2	Low-quality	Genome-fragment	1.26	AAI-based (medium-confidence)	0	1	no viral genes detected
s18v1-PF_70425	1431	No	NA	2	0	1	Low-quality	Genome-fragment	0.77	AAI-based (medium-confidence)	0	1	no viral genes detected
s18v1-PF_70619	1402	No	NA	2	0	1	Not-determined	Genome-fragment	NA	NA	0	1	no viral genes detected
s18v1-PF_70802	1798	No	NA	2	0	0	Not-determined	Genome-fragment	NA	NA	0	1	no viral genes detected
s18v1-PF_70953	1022	No	NA	1	0	0	Low-quality	Genome-fragment	1.25	AAI-based (high-confidence)	0	1	no viral genes detected
s18v1-PF_71004	1161	No	NA	1	0	1	Not-determined	Genome-fragment	NA	NA	0	1	no viral genes detected
s18v1-PF_71111	1223	No	NA	2	2	0	Low-quality	Genome-fragment	3.08	AAI-based (high-confidence)	0	1
s18v1-PF_71190	3322	No	NA	5	0	1	Not-determined	Genome-fragment	NA	NA	0	1	no viral genes detected
s18v1-PF_71215	1302	No	NA	3	0	0	Low-quality	Genome-fragment	3.24	AAI-based (medium-confidence)	0	1	no viral genes detected
s18v1-PF_71257	1225	No	NA	1	0	1	Not-determined	Genome-fragment	NA	NA	0	1	no viral genes detected
s18v1-PF_71366	1126	No	NA	5	1	0	Low-quality	Genome-fragment	3.08	AAI-based (medium-confidence)	0	1
s18v1-PF_71368	1188	No	NA	2	0	1	Not-determined	Genome-fragment	NA	NA	0	1	no viral genes detected
s18v1-PF_71462	4534	No	NA	6	0	0	Low-quality	Genome-fragment	9.68	AAI-based (high-confidence)	0	1	no viral genes detected
s18v1-PF_71478	1117	No	NA	1	0	1	Not-determined	Genome-fragment	NA	NA	0	1	no viral genes detected
s18v1-PF_71553	1043	No	NA	2	0	2	Not-determined	Genome-fragment	NA	NA	0	1	no viral genes detected
s18v1-PF_71659	1210	No	NA	1	0	1	Not-determined	Genome-fragment	NA	NA	0	1	no viral genes detected
s18v1-PF_71709	1016	No	NA	2	1	0	Low-quality	Genome-fragment	1.87	AAI-based (high-confidence)	0	1
s18v1-PF_71782	1055	No	NA	1	0	1	Not-determined	Genome-fragment	NA	NA	0	1	no viral genes detected
s18v1-PF_71930	1394	No	NA	2	0	1	Not-determined	Genome-fragment	NA	NA	0	1	no viral genes detected
s18v1-PF_72000	1495	No	NA	2	0	2	Not-determined	Genome-fragment	NA	NA	0	1	no viral genes detected
s18v1-PF_72050	1049	No	NA	1	0	1	Not-determined	Genome-fragment	NA	NA	0	1	no viral genes detected
s18v1-PF_72122	3783	No	NA	2	0	1	Low-quality	Genome-fragment	0.48	AAI-based (medium-confidence)	0	1	no viral genes detected
s18v1-PF_72155	1436	No	NA	3	0	2	Not-determined	Genome-fragment	NA	NA	0	1	no viral genes detected
s18v1-PF_72222	1125	No	NA	2	0	0	Not-determined	Genome-fragment	NA	NA	0	1	no viral genes detected
s18v1-PF_72224	1331	No	NA	3	0	0	Not-determined	Genome-fragment	NA	NA	0	1	no viral genes detected
s18v1-PF_72285	78884	No	NA	82	6	0	Low-quality	Genome-fragment	19.94	AAI-based (high-confidence)	0	1	low-confidence ITR
s18v1-PF_72370	1088	No	NA	1	0	1	Not-determined	Genome-fragment	NA	NA	0	1	no viral genes detected
s18v1-PF_72438	1482	No	NA	5	0	4	Not-determined	Genome-fragment	NA	NA	0	1	no viral genes detected
s18v1-PF_72494	9770	No	NA	14	0	0	Low-quality	Genome-fragment	2.46	AAI-based (high-confidence)	0	1	no viral genes detected
s18v1-PF_72542	5510	No	NA	5	0	1	Not-determined	Genome-fragment	NA	NA	0	1	no viral genes detected
s18v1-PF_72555	1381	No	NA	2	0	1	Not-determined	Genome-fragment	NA	NA	0	1	no viral genes detected
s18v1-PF_72647	2998	No	NA	2	0	1	Not-determined	Genome-fragment	NA	NA	0	1	no viral genes detected
s18v1-PF_72688	1240	No	NA	1	0	1	Low-quality	Genome-fragment	0.9	AAI-based (medium-confidence)	0	1	no viral genes detected
s18v1-PF_72712	1818	No	NA	3	0	3	Not-determined	Genome-fragment	NA	NA	0	1	no viral genes detected
s18v1-PF_72885	1158	No	NA	2	0	2	Not-determined	Genome-fragment	NA	NA	0	1	no viral genes detected
s18v1-PF_72938	2061	No	NA	1	0	0	Not-determined	Genome-fragment	NA	NA	0	1	no viral genes detected
s18v1-PF_73242	1123	No	NA	1	0	0	Not-determined	Genome-fragment	NA	NA	0	1	no viral genes detected
s18v1-PF_73393	1233	No	NA	1	0	1	Not-determined	Genome-fragment	NA	NA	0	1	no viral genes detected
s18v1-PF_73410	6520	No	NA	13	2	0	Low-quality	Genome-fragment	15.06	AAI-based (high-confidence)	0	1
s18v1-PF_73461	1630	No	NA	2	0	2	Low-quality	Genome-fragment	1.02	AAI-based (high-confidence)	0	1	no viral genes detected
s18v1-PF_73637	1125	No	NA	2	0	1	Not-determined	Genome-fragment	NA	NA	0	1	no viral genes detected
s18v1-PF_73652	1280	No	NA	4	0	2	Not-determined	Genome-fragment	NA	NA	0	1	no viral genes detected
s18v1-PF_73734	1331	No	NA	2	0	0	Not-determined	Genome-fragment	NA	NA	0	1	no viral genes detected
s18v1-PF_73771	1048	No	NA	1	0	0	Low-quality	Genome-fragment	2.35	AAI-based (high-confidence)	0	1	no viral genes detected
s18v1-PF_74091	3154	No	NA	2	0	2	Not-determined	Genome-fragment	NA	NA	0	1	no viral genes detected
s18v1-PF_74122	1100	No	NA	3	0	1	Not-determined	Genome-fragment	NA	NA	0	1	no viral genes detected
s18v1-PF_74181	1260	No	NA	2	0	2	Not-determined	Genome-fragment	NA	NA	0	1	no viral genes detected
s18v1-PF_74282	2145	No	NA	1	0	1	Not-determined	Genome-fragment	NA	NA	0	1	no viral genes detected
s18v1-PF_74352	1411	No	NA	1	0	0	Not-determined	Genome-fragment	NA	NA	0	1	no viral genes detected
s18v1-PF_74430	1146	No	NA	1	0	1	Not-determined	Genome-fragment	NA	NA	0	1	no viral genes detected
s18v1-PF_74695	2187	No	NA	1	0	1	Not-determined	Genome-fragment	NA	NA	0	1	no viral genes detected
s18v1-PF_74836	1118	No	NA	1	1	0	Low-quality	Genome-fragment	1.92	AAI-based (high-confidence)	0	1
s18v1-PF_75021	4754	No	NA	2	0	2	Not-determined	Genome-fragment	NA	NA	0	1	no viral genes detected
s18v1-PF_75032	1156	No	NA	3	0	1	Not-determined	Genome-fragment	NA	NA	0	1	no viral genes detected
s18v1-PF_75082	2608	No	NA	2	0	1	Not-determined	Genome-fragment	NA	NA	0	1	no viral genes detected
s18v1-PF_75116	1168	No	NA	1	0	0	Not-determined	Genome-fragment	NA	NA	0	1	no viral genes detected
s18v1-PF_75209	3890	No	NA	2	0	2	Not-determined	Genome-fragment	NA	NA	0	1	no viral genes detected
s18v1-PF_75318	2042	No	NA	2	0	1	Not-determined	Genome-fragment	NA	NA	0	1	no viral genes detected
s18v1-PF_75374	1367	No	NA	2	0	1	Not-determined	Genome-fragment	NA	NA	0	1	no viral genes detected
s18v1-PF_75451	1700	No	NA	1	0	1	Not-determined	Genome-fragment	NA	NA	0	1	no viral genes detected
s18v1-PF_75543	1052	No	NA	3	0	0	Low-quality	Genome-fragment	1.71	AAI-based (medium-confidence)	0	1	no viral genes detected
s18v1-PF_75549	1378	No	NA	1	0	1	Not-determined	Genome-fragment	NA	NA	0	1	no viral genes detected
s18v1-PF_75575	1015	No	NA	2	0	1	Not-determined	Genome-fragment	NA	NA	0	1	no viral genes detected
s18v1-PF_75640	1132	No	NA	3	0	0	Low-quality	Genome-fragment	2.83	AAI-based (high-confidence)	0	1	no viral genes detected
s18v1-PF_75713	3964	No	NA	3	0	2	Not-determined	Genome-fragment	NA	NA	0	1	no viral genes detected
s18v1-PF_75807	1176	No	NA	2	0	0	Not-determined	Genome-fragment	NA	NA	0	1	no viral genes detected
s18v1-PF_75852	2309	No	NA	4	0	1	Low-quality	Genome-fragment	4.7	AAI-based (medium-confidence)	0	1	no viral genes detected
s18v1-PF_75864	1193	No	NA	2	0	0	Not-determined	Genome-fragment	NA	NA	0	1	no viral genes detected
s18v1-PF_76122	1809	No	NA	2	0	2	Not-determined	Genome-fragment	NA	NA	0	1	no viral genes detected
s18v1-PF_76367	3985	No	NA	4	0	4	Not-determined	Genome-fragment	NA	NA	0	1	no viral genes detected
s18v1-PF_76418	1462	No	NA	3	0	3	Not-determined	Genome-fragment	NA	NA	0	1	no viral genes detected
s18v1-PF_76460	1827	No	NA	2	0	2	Not-determined	Genome-fragment	NA	NA	0	1	no viral genes detected
s18v1-PF_76725	1306	No	NA	1	0	0	Not-determined	Genome-fragment	NA	NA	0	1	no viral genes detected
s18v1-PF_76861	1911	No	NA	1	0	1	Not-determined	Genome-fragment	NA	NA	0	1	no viral genes detected
s18v1-PF_76952	2197	No	NA	2	0	0	Not-determined	Genome-fragment	NA	NA	0	1	no viral genes detected
s18v1-PF_77070	1815	No	NA	4	0	1	Not-determined	Genome-fragment	NA	NA	0	1	no viral genes detected
s18v1-PF_77145	1057	No	NA	1	0	1	Not-determined	Genome-fragment	NA	NA	0	1	no viral genes detected
s18v1-PF_77154	1989	No	NA	3	0	1	Not-determined	Genome-fragment	NA	NA	0	1	no viral genes detected
s18v1-PF_77262	1022	No	NA	1	0	1	Not-determined	Genome-fragment	NA	NA	0	1	no viral genes detected
s18v1-PF_77328	1360	No	NA	2	0	0	Low-quality	Genome-fragment	1	AAI-based (high-confidence)	0	1	no viral genes detected
s18v1-PF_77491	2451	No	NA	3	0	2	Not-determined	Genome-fragment	NA	NA	0	1	no viral genes detected
s18v1-PF_77640	3052	No	NA	2	1	0	Low-quality	Genome-fragment	7.1	AAI-based (medium-confidence)	0	1
s18v1-PF_78080	1251	No	NA	1	0	0	Not-determined	Genome-fragment	NA	NA	0	1	no viral genes detected
s18v1-PF_78113	1391	No	NA	1	0	0	Not-determined	Genome-fragment	NA	NA	0	1	no viral genes detected
s18v1-PF_78175	1049	No	NA	1	0	1	Not-determined	Genome-fragment	NA	NA	0	1	no viral genes detected
s18v1-PF_78356	1162	No	NA	1	0	1	Not-determined	Genome-fragment	NA	NA	0	1	no viral genes detected
s18v1-PF_78396	1378	No	NA	2	0	1	Not-determined	Genome-fragment	NA	NA	0	1	no viral genes detected
s18v1-PF_78437	2097	No	NA	3	0	3	Not-determined	Genome-fragment	NA	NA	0	1	no viral genes detected
s18v1-PF_78485	1094	No	NA	3	0	0	Not-determined	Genome-fragment	NA	NA	0	1	no viral genes detected
s18v1-PF_78507	1027	No	NA	2	0	1	Not-determined	Genome-fragment	NA	NA	0	1	no viral genes detected
s18v1-PF_78651	1874	No	NA	1	0	0	Not-determined	Genome-fragment	NA	NA	0	1	no viral genes detected
s18v1-PF_78669	16276	No	NA	18	8	0	Complete	High-quality	100	ITR (medium-confidence)	0	1
s18v1-PF_78719	1129	No	NA	1	0	0	Not-determined	Genome-fragment	NA	NA	0	1	no viral genes detected
s18v1-PF_78859	2772	No	NA	3	0	0	Not-determined	Genome-fragment	NA	NA	0	1	no viral genes detected
s18v1-PF_78904	2455	No	NA	2	0	1	Not-determined	Genome-fragment	NA	NA	0	1	no viral genes detected
s18v1-PF_78949	1576	No	NA	1	0	1	Not-determined	Genome-fragment	NA	NA	0	1	no viral genes detected
s18v1-PF_79006	4590	Yes	3318	9	1	1	Low-quality	Genome-fragment	5.35	AAI-based (medium-confidence)	27.71	1
s18v1-PF_79071	3066	No	NA	2	0	2	Not-determined	Genome-fragment	NA	NA	0	1	no viral genes detected
s18v1-PF_79089	1160	No	NA	3	0	2	Not-determined	Genome-fragment	NA	NA	0	1	no viral genes detected
s18v1-PF_79464	2079	No	NA	1	0	1	Not-determined	Genome-fragment	NA	NA	0	1	no viral genes detected
s18v1-PF_79557	6959	No	NA	10	0	1	Not-determined	Genome-fragment	NA	NA	0	1	no viral genes detected
s18v1-PF_79712	1023	No	NA	1	0	1	Not-determined	Genome-fragment	NA	NA	0	1	no viral genes detected
s18v1-PF_79748	5083	No	NA	5	0	0	Low-quality	Genome-fragment	10.35	AAI-based (high-confidence)	0	1	no viral genes detected
s18v1-PF_79755	1198	No	NA	1	0	1	Not-determined	Genome-fragment	NA	NA	0	1	no viral genes detected
s18v1-PF_79849	1313	No	NA	2	0	2	Not-determined	Genome-fragment	NA	NA	0	1	no viral genes detected
s18v1-PF_79873	2911	No	NA	2	0	2	Not-determined	Genome-fragment	NA	NA	0	1	no viral genes detected
s18v1-PF_79884	1663	No	NA	3	0	1	Not-determined	Genome-fragment	NA	NA	0	1	no viral genes detected
s18v1-PF_79917	1177	No	NA	1	0	0	Not-determined	Genome-fragment	NA	NA	0	1	no viral genes detected
s18v1-PF_80107	3110	No	NA	3	0	0	Not-determined	Genome-fragment	NA	NA	0	1	no viral genes detected
s18v1-PF_80200	3158	No	NA	3	0	2	Not-determined	Genome-fragment	NA	NA	0	1	no viral genes detected
s18v1-PF_80228	2719	No	NA	1	0	1	Not-determined	Genome-fragment	NA	NA	0	1	no viral genes detected
s18v1-PF_80300	2731	No	NA	2	0	2	Not-determined	Genome-fragment	NA	NA	0	1	no viral genes detected
s18v1-PF_80354	1426	No	NA	3	0	0	Not-determined	Genome-fragment	NA	NA	0	1	no viral genes detected
s18v1-PF_80401	1492	No	NA	3	0	0	Low-quality	Genome-fragment	2.53	AAI-based (high-confidence)	0	1	no viral genes detected
s18v1-PF_80490	1060	No	NA	1	0	1	Not-determined	Genome-fragment	NA	NA	0	1	no viral genes detected
s18v1-PF_80610	2061	No	NA	3	0	2	Not-determined	Genome-fragment	NA	NA	0	1	no viral genes detected
s18v1-PF_80683	1354	No	NA	1	0	1	Not-determined	Genome-fragment	NA	NA	0	1	no viral genes detected
s18v1-PF_80698	1126	No	NA	3	0	1	Not-determined	Genome-fragment	NA	NA	0	1	no viral genes detected
s18v1-PF_80750	5858	No	NA	8	0	1	Not-determined	Genome-fragment	NA	NA	0	1	no viral genes detected
s18v1-PF_80891	1466	No	NA	2	0	2	Not-determined	Genome-fragment	NA	NA	0	1	no viral genes detected
s18v1-PF_80900	1506	No	NA	1	0	1	Not-determined	Genome-fragment	NA	NA	0	1	no viral genes detected
s18v1-PF_80996	1278	No	NA	1	0	0	Not-determined	Genome-fragment	NA	NA	0	1	no viral genes detected
s18v1-PF_81186	1131	No	NA	2	0	1	Not-determined	Genome-fragment	NA	NA	0	1	no viral genes detected
s18v1-PF_81236	1157	No	NA	2	0	2	Not-determined	Genome-fragment	NA	NA	0	1	no viral genes detected
s18v1-PF_81245	1180	No	NA	3	0	2	Not-determined	Genome-fragment	NA	NA	0	1	no viral genes detected
s18v1-PF_81246	2401	No	NA	2	0	2	Not-determined	Genome-fragment	NA	NA	0	1	no viral genes detected
s18v1-PF_81581	1021	No	NA	3	0	3	Not-determined	Genome-fragment	NA	NA	0	1	no viral genes detected
s18v1-PF_81643	7621	No	NA	7	0	1	Not-determined	Genome-fragment	NA	NA	0	1	no viral genes detected
s18v1-PF_81781	1831	No	NA	5	0	5	Not-determined	Genome-fragment	NA	NA	0	1	no viral genes detected
s18v1-PF_81856	2633	No	NA	3	0	2	Not-determined	Genome-fragment	NA	NA	0	1	no viral genes detected
s18v1-PF_81895	1768	No	NA	1	0	0	Not-determined	Genome-fragment	NA	NA	0	1	no viral genes detected
s18v1-PF_81926	1887	No	NA	2	0	2	Not-determined	Genome-fragment	NA	NA	0	1	no viral genes detected
s18v1-PF_82199	1193	No	NA	1	0	1	Not-determined	Genome-fragment	NA	NA	0	1	no viral genes detected
s18v1-PF_82274	3180	No	NA	6	0	4	Not-determined	Genome-fragment	NA	NA	0	1	no viral genes detected
s18v1-PF_82301	1524	No	NA	1	0	1	Not-determined	Genome-fragment	NA	NA	0	1	no viral genes detected
s18v1-PF_82627	2204	No	NA	4	0	2	Not-determined	Genome-fragment	NA	NA	0	1	no viral genes detected
s18v1-PF_82688	1175	No	NA	1	0	0	Not-determined	Genome-fragment	NA	NA	0	1	no viral genes detected
s18v1-PF_82734	1351	No	NA	1	0	0	Not-determined	Genome-fragment	NA	NA	0	1	no viral genes detected
s18v1-PF_82757	1243	No	NA	2	0	2	Not-determined	Genome-fragment	NA	NA	0	1	no viral genes detected
s18v1-PF_82843	2883	No	NA	3	0	2	Not-determined	Genome-fragment	NA	NA	0	1	no viral genes detected
s18v1-PF_82891	2071	No	NA	3	0	1	Not-determined	Genome-fragment	NA	NA	0	1	no viral genes detected
s18v1-PF_83161	1002	No	NA	3	0	0	Low-quality	Genome-fragment	0.99	AAI-based (medium-confidence)	0	1	no viral genes detected
s18v1-PF_83175	1115	No	NA	1	0	1	Not-determined	Genome-fragment	NA	NA	0	1	no viral genes detected
s18v1-PF_83220	1371	No	NA	3	0	1	Low-quality	Genome-fragment	0.43	AAI-based (medium-confidence)	0	1	no viral genes detected
s18v1-PF_83233	1303	No	NA	2	0	1	Not-determined	Genome-fragment	NA	NA	0	1	no viral genes detected
s18v1-PF_83246	1269	No	NA	1	0	1	Not-determined	Genome-fragment	NA	NA	0	1	no viral genes detected
s18v1-PF_83277	1917	No	NA	2	0	1	Not-determined	Genome-fragment	NA	NA	0	1	no viral genes detected
s18v1-PF_83543	1051	No	NA	2	0	1	Not-determined	Genome-fragment	NA	NA	0	1	no viral genes detected
s18v1-PF_83579	1924	No	NA	3	0	0	Low-quality	Genome-fragment	2.88	AAI-based (high-confidence)	0	1	no viral genes detected
[truncated: 7,194 more rows]

## Sheet: contamination
contig_id	contig_length	total_genes	viral_genes	host_genes	provirus	proviral_length	host_length	region_types	region_lengths	region_coords_bp	region_coords_genes	region_viral_genes	region_host_genes
s18v1_56	1181	1	0	0	No	NA	NA	NA	NA	NA	NA	NA	NA
s18v1_92	1485	2	0	1	No	NA	NA	NA	NA	NA	NA	NA	NA
s18v1_133	1459	2	0	0	No	NA	NA	NA	NA	NA	NA	NA	NA
s18v1_173	1326	2	0	0	No	NA	NA	NA	NA	NA	NA	NA	NA
s18v1_296	1548	3	0	3	No	NA	NA	NA	NA	NA	NA	NA	NA
s18v1_397	1515	3	0	2	No	NA	NA	NA	NA	NA	NA	NA	NA
s18v1_593	1155	2	0	0	No	NA	NA	NA	NA	NA	NA	NA	NA
s18v1_661	10625	17	6	1	No	NA	NA	NA	NA	NA	NA	NA	NA
s18v1_810	4783	3	0	2	No	NA	NA	NA	NA	NA	NA	NA	NA
s18v1_863	1015	2	0	0	No	NA	NA	NA	NA	NA	NA	NA	NA
s18v1_890	1798	2	0	2	No	NA	NA	NA	NA	NA	NA	NA	NA
s18v1_920	6689	13	0	1	No	NA	NA	NA	NA	NA	NA	NA	NA
s18v1_1023	1014	2	0	0	No	NA	NA	NA	NA	NA	NA	NA	NA
s18v1_1038	1048	2	0	1	No	NA	NA	NA	NA	NA	NA	NA	NA
s18v1_1186	1006	2	0	0	No	NA	NA	NA	NA	NA	NA	NA	NA
s18v1_1194	1059	4	0	0	No	NA	NA	NA	NA	NA	NA	NA	NA
s18v1_1229	1159	2	0	2	No	NA	NA	NA	NA	NA	NA	NA	NA
s18v1_1240	1504	2	0	2	No	NA	NA	NA	NA	NA	NA	NA	NA
s18v1_1368	1060	2	0	1	No	NA	NA	NA	NA	NA	NA	NA	NA
s18v1_1410	1010	3	0	0	No	NA	NA	NA	NA	NA	NA	NA	NA
s18v1_1465	1193	1	0	0	No	NA	NA	NA	NA	NA	NA	NA	NA
s18v1_1469	1214	2	0	2	No	NA	NA	NA	NA	NA	NA	NA	NA
s18v1_1510	1432	2	1	0	No	NA	NA	NA	NA	NA	NA	NA	NA
s18v1_1573	4086	4	0	4	No	NA	NA	NA	NA	NA	NA	NA	NA
s18v1_1667	1046	2	0	0	No	NA	NA	NA	NA	NA	NA	NA	NA
s18v1_1806	4257	4	0	1	No	NA	NA	NA	NA	NA	NA	NA	NA
s18v1_2027	1025	2	2	0	No	NA	NA	NA	NA	NA	NA	NA	NA
s18v1_2053	1136	3	1	0	No	NA	NA	NA	NA	NA	NA	NA	NA
s18v1_2132	3686	3	1	1	Yes	1729	1957	viral,host	17291957	1-1729,1730-3686	1-2,3-3	1,0	0,1
s18v1_2135	1608	1	0	0	No	NA	NA	NA	NA	NA	NA	NA	NA
s18v1_2278	1177	1	0	1	No	NA	NA	NA	NA	NA	NA	NA	NA
s18v1_2296	3660	16	0	0	No	NA	NA	NA	NA	NA	NA	NA	NA
s18v1_2407	1561	3	0	0	No	NA	NA	NA	NA	NA	NA	NA	NA
s18v1_2570	1370	1	0	0	No	NA	NA	NA	NA	NA	NA	NA	NA
s18v1_2598	1517	2	0	2	No	NA	NA	NA	NA	NA	NA	NA	NA
s18v1_2684	1996	2	0	0	No	NA	NA	NA	NA	NA	NA	NA	NA
s18v1_2831	1576	1	0	0	No	NA	NA	NA	NA	NA	NA	NA	NA
s18v1_2886	2682	1	0	1	No	NA	NA	NA	NA	NA	NA	NA	NA
s18v1_2934	2144	1	0	0	No	NA	NA	NA	NA	NA	NA	NA	NA
s18v1_3001	2916	3	0	1	No	NA	NA	NA	NA	NA	NA	NA	NA
s18v1_3022	48403	69	6	3	No	NA	NA	NA	NA	NA	NA	NA	NA
s18v1_3114	1086	2	0	0	No	NA	NA	NA	NA	NA	NA	NA	NA
s18v1_3230	1565	4	2	0	No	NA	NA	NA	NA	NA	NA	NA	NA
s18v1_3379	1064	3	0	0	No	NA	NA	NA	NA	NA	NA	NA	NA
s18v1_3381	1104	1	0	1	No	NA	NA	NA	NA	NA	NA	NA	NA
s18v1_3439	1152	3	0	1	No	NA	NA	NA	NA	NA	NA	NA	NA
s18v1_3619	1465	3	0	0	No	NA	NA	NA	NA	NA	NA	NA	NA
s18v1_3635	1100	1	0	1	No	NA	NA	NA	NA	NA	NA	NA	NA
s18v1_3799	1404	2	0	0	No	NA	NA	NA	NA	NA	NA	NA	NA
s18v1_3834	3350	2	0	1	No	NA	NA	NA	NA	NA	NA	NA	NA
s18v1_3894	1061	1	0	0	No	NA	NA	NA	NA	NA	NA	NA	NA
s18v1_3927	1156	4	0	0	No	NA	NA	NA	NA	NA	NA	NA	NA
s18v1_4072	1465	1	0	0	No	NA	NA	NA	NA	NA	NA	NA	NA
s18v1_4155	1192	1	0	0	No	NA	NA	NA	NA	NA	NA	NA	NA
s18v1_4261	1253	1	0	0	No	NA	NA	NA	NA	NA	NA	NA	NA
s18v1_4297	1017	1	0	1	No	NA	NA	NA	NA	NA	NA	NA	NA
s18v1_4316	1568	3	0	1	No	NA	NA	NA	NA	NA	NA	NA	NA
s18v1_4525	3583	6	0	1	No	NA	NA	NA	NA	NA	NA	NA	NA
s18v1_4568	1814	2	0	1	No	NA	NA	NA	NA	NA	NA	NA	NA
s18v1_4569	1018	2	0	1	No	NA	NA	NA	NA	NA	NA	NA	NA
s18v1_4730	1157	1	0	0	No	NA	NA	NA	NA	NA	NA	NA	NA
s18v1_5012	1023	4	1	0	No	NA	NA	NA	NA	NA	NA	NA	NA
s18v1_5036	49675	78	21	0	No	NA	NA	NA	NA	NA	NA	NA	NA
s18v1_5067	1083	2	0	1	No	NA	NA	NA	NA	NA	NA	NA	NA
s18v1_5300	6043	2	0	1	No	NA	NA	NA	NA	NA	NA	NA	NA
s18v1_5488	1011	2	0	2	No	NA	NA	NA	NA	NA	NA	NA	NA
s18v1_5493	1489	2	0	0	No	NA	NA	NA	NA	NA	NA	NA	NA
s18v1_5584	1305	2	0	0	No	NA	NA	NA	NA	NA	NA	NA	NA
s18v1_5615	6566	6	0	1	No	NA	NA	NA	NA	NA	NA	NA	NA
s18v1_5671	1798	3	0	1	No	NA	NA	NA	NA	NA	NA	NA	NA
s18v1_5734	1445	1	0	0	No	NA	NA	NA	NA	NA	NA	NA	NA
s18v1_5735	1615	1	0	0	No	NA	NA	NA	NA	NA	NA	NA	NA
s18v1_5754	1658	4	0	0	No	NA	NA	NA	NA	NA	NA	NA	NA
s18v1_5764	2157	3	0	0	No	NA	NA	NA	NA	NA	NA	NA	NA
s18v1_5823	3996	5	0	2	No	NA	NA	NA	NA	NA	NA	NA	NA
s18v1_5898	1176	1	0	0	No	NA	NA	NA	NA	NA	NA	NA	NA
s18v1_6002	1094	2	0	2	No	NA	NA	NA	NA	NA	NA	NA	NA
s18v1_6042	2176	1	0	1	No	NA	NA	NA	NA	NA	NA	NA	NA
s18v1_6051	9580	18	0	2	No	NA	NA	NA	NA	NA	NA	NA	NA
s18v1_6132	1665	1	0	1	No	NA	NA	NA	NA	NA	NA	NA	NA
s18v1_6202	1001	1	0	0	No	NA	NA	NA	NA	NA	NA	NA	NA
s18v1_6228	3900	3	0	3	No	NA	NA	NA	NA	NA	NA	NA	NA
s18v1_6282	21726	25	1	4	No	NA	NA	NA	NA	NA	NA	NA	NA
s18v1_6301	1230	2	0	1	No	NA	NA	NA	NA	NA	NA	NA	NA
s18v1_6329	3807	6	0	0	No	NA	NA	NA	NA	NA	NA	NA	NA
s18v1_6496	1279	4	0	0	No	NA	NA	NA	NA	NA	NA	NA	NA
s18v1_6554	1467	1	0	1	No	NA	NA	NA	NA	NA	NA	NA	NA
s18v1_6575	6441	16	0	0	No	NA	NA	NA	NA	NA	NA	NA	NA
s18v1_6613	1881	2	0	1	No	NA	NA	NA	NA	NA	NA	NA	NA
s18v1_6666	5223	3	1	1	Yes	3997	1226	viral,host	39971226	1-3997,3998-5223	1-1,2-3	1,0	0,1
s18v1_6694	1060	3	0	0	No	NA	NA	NA	NA	NA	NA	NA	NA
s18v1_6703	1220	1	1	0	No	NA	NA	NA	NA	NA	NA	NA	NA
s18v1_6779	1048	3	0	0	No	NA	NA	NA	NA	NA	NA	NA	NA
s18v1_6899	2708	1	0	1	No	NA	NA	NA	NA	NA	NA	NA	NA
s18v1_6962	3025	3	0	1	No	NA	NA	NA	NA	NA	NA	NA	NA
s18v1_6980	1253	2	0	0	No	NA	NA	NA	NA	NA	NA	NA	NA
s18v1_7165	1244	1	0	0	No	NA	NA	NA	NA	NA	NA	NA	NA
s18v1_7175	49522	80	20	0	No	NA	NA	NA	NA	NA	NA	NA	NA
s18v1_7325	1149	2	0	1	No	NA	NA	NA	NA	NA	NA	NA	NA
s18v1_7447	3084	2	0	2	No	NA	NA	NA	NA	NA	NA	NA	NA
s18v1_7483	5209	12	0	0	No	NA	NA	NA	NA	NA	NA	NA	NA
s18v1_7581	1077	1	0	0	No	NA	NA	NA	NA	NA	NA	NA	NA
s18v1_7759	1050	2	0	2	No	NA	NA	NA	NA	NA	NA	NA	NA
s18v1_7770	1351	2	0	0	No	NA	NA	NA	NA	NA	NA	NA	NA
s18v1_7785	1112	3	0	2	No	NA	NA	NA	NA	NA	NA	NA	NA
s18v1_7902	1723	2	0	0	No	NA	NA	NA	NA	NA	NA	NA	NA
s18v1_8009	1509	2	0	2	No	NA	NA	NA	NA	NA	NA	NA	NA
s18v1_8034	1078	2	0	0	No	NA	NA	NA	NA	NA	NA	NA	NA
s18v1_8083	4172	6	2	0	No	NA	NA	NA	NA	NA	NA	NA	NA
s18v1_8153	3576	5	0	4	No	NA	NA	NA	NA	NA	NA	NA	NA
s18v1_8180	1253	2	0	0	No	NA	NA	NA	NA	NA	NA	NA	NA
s18v1_8375	1663	1	0	1	No	NA	NA	NA	NA	NA	NA	NA	NA
s18v1_8382	1083	1	0	1	No	NA	NA	NA	NA	NA	NA	NA	NA
s18v1_8535	20639	21	1	3	No	NA	NA	NA	NA	NA	NA	NA	NA
s18v1_8576	4944	6	0	4	No	NA	NA	NA	NA	NA	NA	NA	NA
s18v1_8738	45595	58	29	0	No	NA	NA	NA	NA	NA	NA	NA	NA
s18v1_8949	3260	4	0	3	No	NA	NA	NA	NA	NA	NA	NA	NA
s18v1_9235	1887	2	0	0	No	NA	NA	NA	NA	NA	NA	NA	NA
s18v1_9312	4764	7	4	0	No	NA	NA	NA	NA	NA	NA	NA	NA
s18v1_9334	3213	3	0	3	No	NA	NA	NA	NA	NA	NA	NA	NA
s18v1_9540	2318	2	0	0	No	NA	NA	NA	NA	NA	NA	NA	NA
s18v1_9686	36971	50	25	0	No	NA	NA	NA	NA	NA	NA	NA	NA
s18v1_9722	1197	2	0	2	No	NA	NA	NA	NA	NA	NA	NA	NA
s18v1_9840	1511	3	1	0	No	NA	NA	NA	NA	NA	NA	NA	NA
s18v1_9861	1412	2	0	1	No	NA	NA	NA	NA	NA	NA	NA	NA
s18v1_9902	2269	3	0	3	No	NA	NA	NA	NA	NA	NA	NA	NA
s18v1_9974	1035	2	0	1	No	NA	NA	NA	NA	NA	NA	NA	NA
s18v1_9985	6329	5	0	4	No	NA	NA	NA	NA	NA	NA	NA	NA
s18v1_10077	1373	1	0	1	No	NA	NA	NA	NA	NA	NA	NA	NA
s18v1_10189	6506	6	2	0	No	NA	NA	NA	NA	NA	NA	NA	NA
s18v1_10202	3699	5	0	0	No	NA	NA	NA	NA	NA	NA	NA	NA
s18v1_10226	1434	3	0	0	No	NA	NA	NA	NA	NA	NA	NA	NA
s18v1_10360	3022	2	0	1	No	NA	NA	NA	NA	NA	NA	NA	NA
s18v1_10502	179793	220	28	4	No	NA	NA	NA	NA	NA	NA	NA	NA
s18v1_10556	1213	2	0	1	No	NA	NA	NA	NA	NA	NA	NA	NA
s18v1_10566	1004	2	0	0	No	NA	NA	NA	NA	NA	NA	NA	NA
s18v1_10670	1140	2	0	1	No	NA	NA	NA	NA	NA	NA	NA	NA
s18v1_10857	1217	1	0	1	No	NA	NA	NA	NA	NA	NA	NA	NA
s18v1_10905	1352	1	0	0	No	NA	NA	NA	NA	NA	NA	NA	NA
s18v1_10914	1172	2	0	2	No	NA	NA	NA	NA	NA	NA	NA	NA
s18v1_10951	3282	3	0	1	No	NA	NA	NA	NA	NA	NA	NA	NA
s18v1_11164	1035	1	0	0	No	NA	NA	NA	NA	NA	NA	NA	NA
s18v1_11199	1250	1	0	1	No	NA	NA	NA	NA	NA	NA	NA	NA
s18v1_11202	1464	4	0	4	No	NA	NA	NA	NA	NA	NA	NA	NA
s18v1_11210	4215	6	0	2	No	NA	NA	NA	NA	NA	NA	NA	NA
s18v1_11274	1242	2	0	0	No	NA	NA	NA	NA	NA	NA	NA	NA
s18v1_11350	1080	2	0	0	No	NA	NA	NA	NA	NA	NA	NA	NA
s18v1_11446	2393	2	0	1	No	NA	NA	NA	NA	NA	NA	NA	NA
s18v1_11456	30170	55	1	0	No	NA	NA	NA	NA	NA	NA	NA	NA
s18v1_11489	1090	1	0	0	No	NA	NA	NA	NA	NA	NA	NA	NA
s18v1_11529	2261	2	0	0	No	NA	NA	NA	NA	NA	NA	NA	NA
s18v1_11531	1227	2	0	1	No	NA	NA	NA	NA	NA	NA	NA	NA
s18v1_11560	1854	1	0	0	No	NA	NA	NA	NA	NA	NA	NA	NA
s18v1_11647	3236	4	0	3	No	NA	NA	NA	NA	NA	NA	NA	NA
s18v1_11835	1683	1	0	0	No	NA	NA	NA	NA	NA	NA	NA	NA
s18v1_11840	4394	5	0	2	No	NA	NA	NA	NA	NA	NA	NA	NA
s18v1_11889	1591	2	0	0	No	NA	NA	NA	NA	NA	NA	NA	NA
s18v1_11981	7907	9	1	0	No	NA	NA	NA	NA	NA	NA	NA	NA
s18v1_12039	1087	3	0	3	No	NA	NA	NA	NA	NA	NA	NA	NA
s18v1_12117	1342	2	0	0	No	NA	NA	NA	NA	NA	NA	NA	NA
s18v1_12126	2296	2	0	1	No	NA	NA	NA	NA	NA	NA	NA	NA
s18v1_12133	1207	2	0	1	No	NA	NA	NA	NA	NA	NA	NA	NA
s18v1_12205	1120	1	0	1	No	NA	NA	NA	NA	NA	NA	NA	NA
s18v1_12243	39621	55	12	7	Yes	32688	6933	viral,host	326886933	1-32688,32689-39621	1-45,46-55	12,0	1,6
s18v1_12262	7365	6	0	3	No	NA	NA	NA	NA	NA	NA	NA	NA
s18v1_12284	3569	4	0	0	No	NA	NA	NA	NA	NA	NA	NA	NA
s18v1_12597	4559	7	0	1	No	NA	NA	NA	NA	NA	NA	NA	NA
s18v1_12633	2278	1	0	1	No	NA	NA	NA	NA	NA	NA	NA	NA
s18v1_12641	1900	2	0	1	No	NA	NA	NA	NA	NA	NA	NA	NA
s18v1_12758	1669	2	0	1	No	NA	NA	NA	NA	NA	NA	NA	NA
s18v1_12815	1022	1	0	1	No	NA	NA	NA	NA	NA	NA	NA	NA
s18v1_12834	1322	2	0	0	No	NA	NA	NA	NA	NA	NA	NA	NA
s18v1_12916	1169	1	0	1	No	NA	NA	NA	NA	NA	NA	NA	NA
s18v1_12938	2424	6	0	0	No	NA	NA	NA	NA	NA	NA	NA	NA
s18v1_13025	37802	48	7	2	No	NA	NA	NA	NA	NA	NA	NA	NA
s18v1_13085	16832	28	4	0	No	NA	NA	NA	NA	NA	NA	NA	NA
s18v1_13088	3186	3	0	2	No	NA	NA	NA	NA	NA	NA	NA	NA
s18v1_13202	1035	3	0	1	No	NA	NA	NA	NA	NA	NA	NA	NA
s18v1_13209	1539	1	0	1	No	NA	NA	NA	NA	NA	NA	NA	NA
s18v1_13231	3636	1	0	0	No	NA	NA	NA	NA	NA	NA	NA	NA
s18v1_13233	2377	5	0	4	No	NA	NA	NA	NA	NA	NA	NA	NA
s18v1_13327	1839	3	0	1	No	NA	NA	NA	NA	NA	NA	NA	NA
s18v1_13331	4171	11	2	0	No	NA	NA	NA	NA	NA	NA	NA	NA
s18v1_13349	6502	6	2	0	No	NA	NA	NA	NA	NA	NA	NA	NA
s18v1_13380	4370	7	3	0	No	NA	NA	NA	NA	NA	NA	NA	NA
s18v1_13418	3244	3	0	2	No	NA	NA	NA	NA	NA	NA	NA	NA
s18v1_13432	1832	3	0	0	No	NA	NA	NA	NA	NA	NA	NA	NA
s18v1_13454	2632	5	4	0	No	NA	NA	NA	NA	NA	NA	NA	NA
s18v1_13464	8431	23	3	0	No	NA	NA	NA	NA	NA	NA	NA	NA
s18v1_13799	1056	2	0	1	No	NA	NA	NA	NA	NA	NA	NA	NA
s18v1_14043	1564	2	0	0	No	NA	NA	NA	NA	NA	NA	NA	NA
s18v1_14102	1303	1	0	1	No	NA	NA	NA	NA	NA	NA	NA	NA
s18v1_14124	1792	2	0	2	No	NA	NA	NA	NA	NA	NA	NA	NA
s18v1_14300	1085	2	0	1	No	NA	NA	NA	NA	NA	NA	NA	NA
s18v1_14333	1049	1	1	0	No	NA	NA	NA	NA	NA	NA	NA	NA
s18v1_14506	1008	1	0	1	No	NA	NA	NA	NA	NA	NA	NA	NA
s18v1_14590	1045	1	0	0	No	NA	NA	NA	NA	NA	NA	NA	NA
s18v1_14624	1135	1	0	0	No	NA	NA	NA	NA	NA	NA	NA	NA
s18v1_14721	4230	2	0	1	No	NA	NA	NA	NA	NA	NA	NA	NA
s18v1_14736	1097	2	0	1	No	NA	NA	NA	NA	NA	NA	NA	NA
s18v1_14784	1750	2	0	0	No	NA	NA	NA	NA	NA	NA	NA	NA
s18v1_14830	1315	3	0	1	No	NA	NA	NA	NA	NA	NA	NA	NA
s18v1_14876	1581	1	0	1	No	NA	NA	NA	NA	NA	NA	NA	NA
s18v1_14923	1185	1	0	0	No	NA	NA	NA	NA	NA	NA	NA	NA
s18v1_14955	1412	2	0	0	No	NA	NA	NA	NA	NA	NA	NA	NA
s18v1_15128	1814	1	0	1	No	NA	NA	NA	NA	NA	NA	NA	NA
s18v1_15162	1263	2	0	1	No	NA	NA	NA	NA	NA	NA	NA	NA
s18v1_15195	1025	3	0	0	No	NA	NA	NA	NA	NA	NA	NA	NA
s18v1_15242	36882	51	20	0	No	NA	NA	NA	NA	NA	NA	NA	NA
s18v1_15353	8491	15	1	0	No	NA	NA	NA	NA	NA	NA	NA	NA
s18v1_15362	1192	1	0	0	No	NA	NA	NA	NA	NA	NA	NA	NA
s18v1_15373	1207	1	0	1	No	NA	NA	NA	NA	NA	NA	NA	NA
s18v1_15635	6963	11	0	5	No	NA	NA	NA	NA	NA	NA	NA	NA
s18v1_15669	1279	1	0	0	No	NA	NA	NA	NA	NA	NA	NA	NA
s18v1_15675	1673	2	0	1	No	NA	NA	NA	NA	NA	NA	NA	NA
s18v1_15682	1233	2	2	0	No	NA	NA	NA	NA	NA	NA	NA	NA
s18v1_15698	7991	9	2	2	Yes	4180	3811	host,viral	38114180	1-3811,3812-7991	1-6,7-9	1,1	2,0
s18v1_15701	178707	228	37	14	No	NA	NA	NA	NA	NA	NA	NA	NA
s18v1_15781	1207	2	0	0	No	NA	NA	NA	NA	NA	NA	NA	NA
s18v1_15811	1794	4	0	1	No	NA	NA	NA	NA	NA	NA	NA	NA
s18v1_15884	1228	2	0	0	No	NA	NA	NA	NA	NA	NA	NA	NA
s18v1_15954	1437	2	0	0	No	NA	NA	NA	NA	NA	NA	NA	NA
s18v1_16059	1203	2	0	0	No	NA	NA	NA	NA	NA	NA	NA	NA
s18v1_16087	3170	4	0	3	No	NA	NA	NA	NA	NA	NA	NA	NA
s18v1_16173	1114	1	0	1	No	NA	NA	NA	NA	NA	NA	NA	NA
s18v1_16190	1030	1	0	0	No	NA	NA	NA	NA	NA	NA	NA	NA
s18v1_16400	1996	2	0	1	No	NA	NA	NA	NA	NA	NA	NA	NA
s18v1_16522	1666	2	0	1	No	NA	NA	NA	NA	NA	NA	NA	NA
s18v1_16721	1058	1	0	0	No	NA	NA	NA	NA	NA	NA	NA	NA
s18v1_16785	3253	3	0	1	No	NA	NA	NA	NA	NA	NA	NA	NA
s18v1_16905	1630	3	0	0	No	NA	NA	NA	NA	NA	NA	NA	NA
s18v1_17033	1119	0	0	0	No	NA	NA	NA	NA	NA	NA	NA	NA
s18v1_17090	1039	1	0	1	No	NA	NA	NA	NA	NA	NA	NA	NA
s18v1_17122	1346	2	0	0	No	NA	NA	NA	NA	NA	NA	NA	NA
s18v1_17143	1234	3	0	0	No	NA	NA	NA	NA	NA	NA	NA	NA
s18v1_17319	1067	1	0	1	No	NA	NA	NA	NA	NA	NA	NA	NA
s18v1_17396	1059	2	0	0	No	NA	NA	NA	NA	NA	NA	NA	NA
s18v1_17504	4474	7	0	3	No	NA	NA	NA	NA	NA	NA	NA	NA
s18v1_17513	1056	1	0	1	No	NA	NA	NA	NA	NA	NA	NA	NA
s18v1_17600	1440	1	0	1	No	NA	NA	NA	NA	NA	NA	NA	NA
s18v1_17618	2287	3	0	2	No	NA	NA	NA	NA	NA	NA	NA	NA
s18v1_17696	1106	2	0	2	No	NA	NA	NA	NA	NA	NA	NA	NA
s18v1_17848	10676	17	12	0	No	NA	NA	NA	NA	NA	NA	NA	NA
s18v1_17852	3849	4	0	1	No	NA	NA	NA	NA	NA	NA	NA	NA
s18v1_17928	1746	2	0	1	No	NA	NA	NA	NA	NA	NA	NA	NA
s18v1_18022	1029	1	0	0	No	NA	NA	NA	NA	NA	NA	NA	NA
s18v1_18046	1180	1	0	1	No	NA	NA	NA	NA	NA	NA	NA	NA
s18v1_18218	1022	3	0	2	No	NA	NA	NA	NA	NA	NA	NA	NA
s18v1_18240	1646	1	0	1	No	NA	NA	NA	NA	NA	NA	NA	NA
s18v1_18271	1548	2	0	2	No	NA	NA	NA	NA	NA	NA	NA	NA
s18v1_18276	101212	132	21	1	No	NA	NA	NA	NA	NA	NA	NA	NA
s18v1_18307	1337	1	0	0	No	NA	NA	NA	NA	NA	NA	NA	NA
s18v1_18385	5078	6	0	5	No	NA	NA	NA	NA	NA	NA	NA	NA
s18v1_18566	1565	2	0	1	No	NA	NA	NA	NA	NA	NA	NA	NA
s18v1_18678	1739	6	0	0	No	NA	NA	NA	NA	NA	NA	NA	NA
s18v1_18996	1805	2	0	1	No	NA	NA	NA	NA	NA	NA	NA	NA
s18v1_19106	1660	1	0	0	No	NA	NA	NA	NA	NA	NA	NA	NA
s18v1_19108	3201	8	0	0	No	NA	NA	NA	NA	NA	NA	NA	NA
s18v1_19237	1085	2	0	1	No	NA	NA	NA	NA	NA	NA	NA	NA
s18v1_19245	1439	3	2	0	No	NA	NA	NA	NA	NA	NA	NA	NA
s18v1_19257	3900	2	0	1	No	NA	NA	NA	NA	NA	NA	NA	NA
s18v1_19263	1150	1	0	1	No	NA	NA	NA	NA	NA	NA	NA	NA
s18v1_19304	4345	9	1	0	No	NA	NA	NA	NA	NA	NA	NA	NA
s18v1_19385	3576	9	5	0	No	NA	NA	NA	NA	NA	NA	NA	NA
s18v1_19388	1090	1	0	1	No	NA	NA	NA	NA	NA	NA	NA	NA
s18v1_19532	1175	1	0	0	No	NA	NA	NA	NA	NA	NA	NA	NA
s18v1_19547	2394	5	2	0	No	NA	NA	NA	NA	NA	NA	NA	NA
s18v1_19562	1338	4	0	0	No	NA	NA	NA	NA	NA	NA	NA	NA
s18v1_19590	1036	2	0	0	No	NA	NA	NA	NA	NA	NA	NA	NA
s18v1_19772	1431	1	0	1	No	NA	NA	NA	NA	NA	NA	NA	NA
s18v1_19892	4140	10	0	0	No	NA	NA	NA	NA	NA	NA	NA	NA
s18v1_19952	1337	1	0	0	No	NA	NA	NA	NA	NA	NA	NA	NA
s18v1_19962	1498	2	0	0	No	NA	NA	NA	NA	NA	NA	NA	NA
s18v1_20055	53859	89	23	0	No	NA	NA	NA	NA	NA	NA	NA	NA
s18v1_20101	1279	1	0	1	No	NA	NA	NA	NA	NA	NA	NA	NA
s18v1_20141	1166	1	0	1	No	NA	NA	NA	NA	NA	NA	NA	NA
s18v1_20179	1028	2	0	2	No	NA	NA	NA	NA	NA	NA	NA	NA
s18v1_20192	1176	3	0	2	No	NA	NA	NA	NA	NA	NA	NA	NA
s18v1_20233	8133	4	0	3	No	NA	NA	NA	NA	NA	NA	NA	NA
s18v1_20273	2355	4	0	1	No	NA	NA	NA	NA	NA	NA	NA	NA
s18v1_20431	2122	1	0	1	No	NA	NA	NA	NA	NA	NA	NA	NA
s18v1_20462	1577	1	0	1	No	NA	NA	NA	NA	NA	NA	NA	NA
s18v1_20469	1561	1	0	1	No	NA	NA	NA	NA	NA	NA	NA	NA
s18v1_20541	1016	2	0	0	No	NA	NA	NA	NA	NA	NA	NA	NA
s18v1_20579	1016	4	3	0	No	NA	NA	NA	NA	NA	NA	NA	NA
s18v1_20781	1378	2	0	2	No	NA	NA	NA	NA	NA	NA	NA	NA
s18v1_20843	4357	10	0	0	No	NA	NA	NA	NA	NA	NA	NA	NA
s18v1_20916	1647	3	0	3	No	NA	NA	NA	NA	NA	NA	NA	NA
s18v1_20950	1463	3	0	0	No	NA	NA	NA	NA	NA	NA	NA	NA
s18v1_20986	1379	1	0	1	No	NA	NA	NA	NA	NA	NA	NA	NA
s18v1_20993	1267	2	0	0	No	NA	NA	NA	NA	NA	NA	NA	NA
s18v1_21107	1008	3	0	2	No	NA	NA	NA	NA	NA	NA	NA	NA
s18v1_21120	1104	2	0	2	No	NA	NA	NA	NA	NA	NA	NA	NA
s18v1_21149	1148	3	0	0	No	NA	NA	NA	NA	NA	NA	NA	NA
s18v1_21220	1030	2	0	1	No	NA	NA	NA	NA	NA	NA	NA	NA
s18v1_21375	1082	1	0	0	No	NA	NA	NA	NA	NA	NA	NA	NA
s18v1_21393	15268	19	1	3	No	NA	NA	NA	NA	NA	NA	NA	NA
s18v1_21533	1067	2	0	1	No	NA	NA	NA	NA	NA	NA	NA	NA
s18v1_21569	1109	1	0	0	No	NA	NA	NA	NA	NA	NA	NA	NA
s18v1_21582	1466	1	0	0	No	NA	NA	NA	NA	NA	NA	NA	NA
s18v1_21689	4236	9	2	0	No	NA	NA	NA	NA	NA	NA	NA	NA
s18v1_21769	3058	3	0	3	No	NA	NA	NA	NA	NA	NA	NA	NA
s18v1_21921	1106	2	0	1	No	NA	NA	NA	NA	NA	NA	NA	NA
s18v1_22062	1335	2	1	0	No	NA	NA	NA	NA	NA	NA	NA	NA
s18v1_22077	2202	2	0	0	No	NA	NA	NA	NA	NA	NA	NA	NA
s18v1_22120	11925	12	0	1	No	NA	NA	NA	NA	NA	NA	NA	NA
s18v1_22191	1409	1	0	1	No	NA	NA	NA	NA	NA	NA	NA	NA
s18v1_22305	1034	2	0	1	No	NA	NA	NA	NA	NA	NA	NA	NA
s18v1_22327	12461	11	0	2	No	NA	NA	NA	NA	NA	NA	NA	NA
s18v1_22651	1011	1	0	0	No	NA	NA	NA	NA	NA	NA	NA	NA
s18v1_22682	3958	3	0	2	No	NA	NA	NA	NA	NA	NA	NA	NA
s18v1_22755	8114	11	0	0	No	NA	NA	NA	NA	NA	NA	NA	NA
s18v1_22876	1413	2	0	0	No	NA	NA	NA	NA	NA	NA	NA	NA
s18v1_22920	1716	5	0	4	No	NA	NA	NA	NA	NA	NA	NA	NA
s18v1_22997	1449	3	0	1	No	NA	NA	NA	NA	NA	NA	NA	NA
s18v1_23055	15867	19	9	0	No	NA	NA	NA	NA	NA	NA	NA	NA
s18v1_23091	2605	4	0	3	No	NA	NA	NA	NA	NA	NA	NA	NA
s18v1_23095	1982	2	0	1	No	NA	NA	NA	NA	NA	NA	NA	NA
s18v1_23135	1605	3	0	1	No	NA	NA	NA	NA	NA	NA	NA	NA
s18v1_23196	1573	3	0	0	No	NA	NA	NA	NA	NA	NA	NA	NA
s18v1_23246	46422	77	13	0	No	NA	NA	NA	NA	NA	NA	NA	NA
s18v1_23352	4679	6	0	6	No	NA	NA	NA	NA	NA	NA	NA	NA
s18v1_23398	2261	3	0	3	No	NA	NA	NA	NA	NA	NA	NA	NA
s18v1_23422	1702	3	0	0	No	NA	NA	NA	NA	NA	NA	NA	NA
s18v1_23432	1217	2	0	1	No	NA	NA	NA	NA	NA	NA	NA	NA
s18v1_23491	1000	1	1	0	No	NA	NA	NA	NA	NA	NA	NA	NA
s18v1_23672	45481	75	17	0	No	NA	NA	NA	NA	NA	NA	NA	NA
s18v1_23753	1423	1	0	1	No	NA	NA	NA	NA	NA	NA	NA	NA
s18v1_23782	3301	2	0	2	No	NA	NA	NA	NA	NA	NA	NA	NA
s18v1_23832	1015	1	0	0	No	NA	NA	NA	NA	NA	NA	NA	NA
s18v1_24066	3837	7	0	1	No	NA	NA	NA	NA	NA	NA	NA	NA
s18v1_24114	1568	2	0	2	No	NA	NA	NA	NA	NA	NA	NA	NA
s18v1_24255	1869	2	0	1	No	NA	NA	NA	NA	NA	NA	NA	NA
s18v1_24279	1269	2	0	0	No	NA	NA	NA	NA	NA	NA	NA	NA
s18v1_24670	1421	3	0	0	No	NA	NA	NA	NA	NA	NA	NA	NA
s18v1_24681	1535	3	0	2	No	NA	NA	NA	NA	NA	NA	NA	NA
s18v1_24739	3936	3	0	1	No	NA	NA	NA	NA	NA	NA	NA	NA
s18v1_25045	39463	66	24	0	No	NA	NA	NA	NA	NA	NA	NA	NA
s18v1_25068	1183	1	0	1	No	NA	NA	NA	NA	NA	NA	NA	NA
s18v1_25097	1816	1	0	1	No	NA	NA	NA	NA	NA	NA	NA	NA
s18v1_25212	1238	1	0	1	No	NA	NA	NA	NA	NA	NA	NA	NA
s18v1_25408	1093	2	0	1	No	NA	NA	NA	NA	NA	NA	NA	NA
s18v1_25418	6993	6	0	3	No	NA	NA	NA	NA	NA	NA	NA	NA
s18v1_25424	1233	3	0	2	No	NA	NA	NA	NA	NA	NA	NA	NA
s18v1_25540	3368	5	1	0	No	NA	NA	NA	NA	NA	NA	NA	NA
s18v1_25556	1321	2	0	2	No	NA	NA	NA	NA	NA	NA	NA	NA
s18v1_25780	1152	0	0	0	No	NA	NA	NA	NA	NA	NA	NA	NA
s18v1_25832	3766	3	0	1	No	NA	NA	NA	NA	NA	NA	NA	NA
s18v1_25860	14978	34	4	1	No	NA	NA	NA	NA	NA	NA	NA	NA
s18v1_25917	1306	1	0	0	No	NA	NA	NA	NA	NA	NA	NA	NA
s18v1_25982	1001	2	2	0	No	NA	NA	NA	NA	NA	NA	NA	NA
s18v1_25992	1857	2	1	0	No	NA	NA	NA	NA	NA	NA	NA	NA
s18v1_26063	1102	1	0	1	No	NA	NA	NA	NA	NA	NA	NA	NA
s18v1_26192	2087	3	0	2	No	NA	NA	NA	NA	NA	NA	NA	NA
s18v1_26194	1008	1	0	1	No	NA	NA	NA	NA	NA	NA	NA	NA
s18v1_26266	12734	31	5	0	No	NA	NA	NA	NA	NA	NA	NA	NA
s18v1_26316	1285	2	0	1	No	NA	NA	NA	NA	NA	NA	NA	NA
s18v1_26338	1221	2	0	0	No	NA	NA	NA	NA	NA	NA	NA	NA
s18v1_26500	1081	1	0	1	No	NA	NA	NA	NA	NA	NA	NA	NA
s18v1_26506	1141	1	0	1	No	NA	NA	NA	NA	NA	NA	NA	NA
s18v1_26548	6311	10	0	1	No	NA	NA	NA	NA	NA	NA	NA	NA
s18v1_26757	1059	1	0	1	No	NA	NA	NA	NA	NA	NA	NA	NA
s18v1_26975	1064	3	0	1	No	NA	NA	NA	NA	NA	NA	NA	NA
s18v1_27018	2004	5	0	0	No	NA	NA	NA	NA	NA	NA	NA	NA
s18v1_27082	4020	8	2	0	No	NA	NA	NA	NA	NA	NA	NA	NA
s18v1_27184	5640	7	4	0	No	NA	NA	NA	NA	NA	NA	NA	NA
s18v1_27258	1163	2	0	2	No	NA	NA	NA	NA	NA	NA	NA	NA
s18v1_27302	2006	2	0	2	No	NA	NA	NA	NA	NA	NA	NA	NA
s18v1_27499	3112	6	0	6	No	NA	NA	NA	NA	NA	NA	NA	NA
s18v1_27503	16674	22	6	0	No	NA	NA	NA	NA	NA	NA	NA	NA
s18v1_27544	36625	45	11	1	No	NA	NA	NA	NA	NA	NA	NA	NA
s18v1_27626	1377	2	0	1	No	NA	NA	NA	NA	NA	NA	NA	NA
s18v1_27654	1694	4	1	0	No	NA	NA	NA	NA	NA	NA	NA	NA
s18v1_27701	4814	7	0	7	No	NA	NA	NA	NA	NA	NA	NA	NA
s18v1_27703	1319	1	0	1	No	NA	NA	NA	NA	NA	NA	NA	NA
s18v1_27778	1265	4	0	0	No	NA	NA	NA	NA	NA	NA	NA	NA
s18v1_27780	1492	4	0	0	No	NA	NA	NA	NA	NA	NA	NA	NA
s18v1_27878	1783	1	0	1	No	NA	NA	NA	NA	NA	NA	NA	NA
s18v1_27887	1466	2	0	2	No	NA	NA	NA	NA	NA	NA	NA	NA
s18v1_27915	1673	1	0	0	No	NA	NA	NA	NA	NA	NA	NA	NA
s18v1_27966	3599	6	0	0	No	NA	NA	NA	NA	NA	NA	NA	NA
s18v1_28141	117632	83	19	2	No	NA	NA	NA	NA	NA	NA	NA	NA
s18v1_28318	1553	2	0	1	No	NA	NA	NA	NA	NA	NA	NA	NA
s18v1_28335	5782	5	1	3	No	NA	NA	NA	NA	NA	NA	NA	NA
s18v1_28426	3614	5	0	0	No	NA	NA	NA	NA	NA	NA	NA	NA
s18v1_28481	2028	3	0	2	No	NA	NA	NA	NA	NA	NA	NA	NA
s18v1_28651	1201	1	0	0	No	NA	NA	NA	NA	NA	NA	NA	NA
s18v1_28695	1129	2	0	1	No	NA	NA	NA	NA	NA	NA	NA	NA
s18v1_28703	1219	2	0	0	No	NA	NA	NA	NA	NA	NA	NA	NA
s18v1_28801	1686	1	0	0	No	NA	NA	NA	NA	NA	NA	NA	NA
s18v1_28808	1026	1	0	0	No	NA	NA	NA	NA	NA	NA	NA	NA
s18v1_28910	1152	1	0	0	No	NA	NA	NA	NA	NA	NA	NA	NA
s18v1_29082	1588	2	0	1	No	NA	NA	NA	NA	NA	NA	NA	NA
s18v1_29166	3569	1	0	0	No	NA	NA	NA	NA	NA	NA	NA	NA
s18v1_29208	2489	9	0	0	No	NA	NA	NA	NA	NA	NA	NA	NA
s18v1_29240	2170	2	0	1	No	NA	NA	NA	NA	NA	NA	NA	NA
s18v1_29291	1722	3	0	1	No	NA	NA	NA	NA	NA	NA	NA	NA
s18v1_29311	1400	1	0	1	No	NA	NA	NA	NA	NA	NA	NA	NA
s18v1_29345	4289	13	1	0	No	NA	NA	NA	NA	NA	NA	NA	NA
s18v1_29411	1486	2	0	1	No	NA	NA	NA	NA	NA	NA	NA	NA
s18v1_29518	1246	2	0	1	No	NA	NA	NA	NA	NA	NA	NA	NA
s18v1_29674	4603	10	1	0	No	NA	NA	NA	NA	NA	NA	NA	NA
s18v1_29716	1027	2	0	0	No	NA	NA	NA	NA	NA	NA	NA	NA
s18v1_29821	1013	2	0	1	No	NA	NA	NA	NA	NA	NA	NA	NA
s18v1_29877	2747	3	0	2	No	NA	NA	NA	NA	NA	NA	NA	NA
s18v1_29879	1666	1	0	1	No	NA	NA	NA	NA	NA	NA	NA	NA
s18v1_29950	1393	1	0	0	No	NA	NA	NA	NA	NA	NA	NA	NA
s18v1_30017	2095	2	0	0	No	NA	NA	NA	NA	NA	NA	NA	NA
s18v1_30095	1657	2	0	0	No	NA	NA	NA	NA	NA	NA	NA	NA
s18v1_30227	3728	4	0	2	No	NA	NA	NA	NA	NA	NA	NA	NA
s18v1_30344	1047	2	0	1	No	NA	NA	NA	NA	NA	NA	NA	NA
s18v1_30441	3417	5	0	4	No	NA	NA	NA	NA	NA	NA	NA	NA
s18v1_30456	1104	2	0	0	No	NA	NA	NA	NA	NA	NA	NA	NA
s18v1_30517	3192	9	2	0	No	NA	NA	NA	NA	NA	NA	NA	NA
s18v1_30519	1540	2	0	2	No	NA	NA	NA	NA	NA	NA	NA	NA
s18v1_30589	1880	3	0	0	No	NA	NA	NA	NA	NA	NA	NA	NA
s18v1_30613	3558	7	0	0	No	NA	NA	NA	NA	NA	NA	NA	NA
s18v1_30639	29773	17	0	15	No	NA	NA	NA	NA	NA	NA	NA	NA
s18v1_30682	1183	2	0	1	No	NA	NA	NA	NA	NA	NA	NA	NA
s18v1_30686	1000	1	0	0	No	NA	NA	NA	NA	NA	NA	NA	NA
s18v1_30850	1768	3	0	0	No	NA	NA	NA	NA	NA	NA	NA	NA
s18v1_30854	1247	1	0	0	No	NA	NA	NA	NA	NA	NA	NA	NA
s18v1_30911	5942	8	6	0	No	NA	NA	NA	NA	NA	NA	NA	NA
s18v1_31016	4149	8	2	0	No	NA	NA	NA	NA	NA	NA	NA	NA
s18v1_31108	2837	2	0	2	No	NA	NA	NA	NA	NA	NA	NA	NA
s18v1_31171	4002	8	0	0	No	NA	NA	NA	NA	NA	NA	NA	NA
s18v1_31273	1204	3	0	3	No	NA	NA	NA	NA	NA	NA	NA	NA
s18v1_31420	15073	17	5	0	No	NA	NA	NA	NA	NA	NA	NA	NA
s18v1_31472	1103	1	0	0	No	NA	NA	NA	NA	NA	NA	NA	NA
s18v1_31595	1425	2	0	2	No	NA	NA	NA	NA	NA	NA	NA	NA
s18v1_31649	1827	2	0	0	No	NA	NA	NA	NA	NA	NA	NA	NA
s18v1_31831	1220	1	0	1	No	NA	NA	NA	NA	NA	NA	NA	NA
s18v1_32074	1022	3	0	0	No	NA	NA	NA	NA	NA	NA	NA	NA
s18v1_32184	1232	2	0	1	No	NA	NA	NA	NA	NA	NA	NA	NA
s18v1_32254	1451	1	0	0	No	NA	NA	NA	NA	NA	NA	NA	NA
s18v1_32302	1203	2	0	1	No	NA	NA	NA	NA	NA	NA	NA	NA
s18v1_32337	1101	1	0	1	No	NA	NA	NA	NA	NA	NA	NA	NA
s18v1_32376	2255	1	0	1	No	NA	NA	NA	NA	NA	NA	NA	NA
s18v1_32417	1463	2	0	2	No	NA	NA	NA	NA	NA	NA	NA	NA
s18v1_32442	1337	4	0	0	No	NA	NA	NA	NA	NA	NA	NA	NA
s18v1_32457	3210	3	0	1	No	NA	NA	NA	NA	NA	NA	NA	NA
s18v1_32612	3139	3	0	1	No	NA	NA	NA	NA	NA	NA	NA	NA
s18v1_32636	1002	2	0	2	No	NA	NA	NA	NA	NA	NA	NA	NA
s18v1_32657	5044	4	0	2	No	NA	NA	NA	NA	NA	NA	NA	NA
s18v1_32727	1636	2	0	1	No	NA	NA	NA	NA	NA	NA	NA	NA
s18v1_32754	1289	1	0	1	No	NA	NA	NA	NA	NA	NA	NA	NA
s18v1_32811	1278	3	0	0	No	NA	NA	NA	NA	NA	NA	NA	NA
s18v1_32838	3421	4	0	3	No	NA	NA	NA	NA	NA	NA	NA	NA
s18v1_32855	1636	2	0	1	No	NA	NA	NA	NA	NA	NA	NA	NA
s18v1_32862	1047	2	0	1	No	NA	NA	NA	NA	NA	NA	NA	NA
s18v1_32891	1911	1	0	1	No	NA	NA	NA	NA	NA	NA	NA	NA
s18v1_32907	1427	1	0	1	No	NA	NA	NA	NA	NA	NA	NA	NA
s18v1_33039	1484	3	0	2	No	NA	NA	NA	NA	NA	NA	NA	NA
s18v1_33119	2275	2	0	1	No	NA	NA	NA	NA	NA	NA	NA	NA
s18v1_33273	1072	2	0	1	No	NA	NA	NA	NA	NA	NA	NA	NA
s18v1_33339	1047	1	0	0	No	NA	NA	NA	NA	NA	NA	NA	NA
s18v1_33401	1085	2	0	1	No	NA	NA	NA	NA	NA	NA	NA	NA
s18v1_33522	5252	8	2	0	No	NA	NA	NA	NA	NA	NA	NA	NA
s18v1_33771	1326	1	0	1	No	NA	NA	NA	NA	NA	NA	NA	NA
s18v1_33802	1099	2	0	2	No	NA	NA	NA	NA	NA	NA	NA	NA
s18v1_33894	1035	2	0	2	No	NA	NA	NA	NA	NA	NA	NA	NA
s18v1_33904	1238	3	0	2	No	NA	NA	NA	NA	NA	NA	NA	NA
s18v1_33957	1017	1	0	1	No	NA	NA	NA	NA	NA	NA	NA	NA
s18v1_34022	1441	4	0	3	No	NA	NA	NA	NA	NA	NA	NA	NA
s18v1_34216	1263	1	0	0	No	NA	NA	NA	NA	NA	NA	NA	NA
s18v1_34353	2361	6	1	0	No	NA	NA	NA	NA	NA	NA	NA	NA
s18v1_34410	1793	2	0	2	No	NA	NA	NA	NA	NA	NA	NA	NA
s18v1_34654	1016	2	0	1	No	NA	NA	NA	NA	NA	NA	NA	NA
s18v1_34947	1494	1	0	1	No	NA	NA	NA	NA	NA	NA	NA	NA
s18v1_34952	1120	1	0	1	No	NA	NA	NA	NA	NA	NA	NA	NA
s18v1_34987	1271	2	0	0	No	NA	NA	NA	NA	NA	NA	NA	NA
s18v1_35002	1158	1	0	0	No	NA	NA	NA	NA	NA	NA	NA	NA
s18v1_35053	1826	3	0	1	No	NA	NA	NA	NA	NA	NA	NA	NA
s18v1_35122	1012	1	0	0	No	NA	NA	NA	NA	NA	NA	NA	NA
s18v1_35138	1278	1	0	1	No	NA	NA	NA	NA	NA	NA	NA	NA
s18v1_35144	1148	2	0	1	No	NA	NA	NA	NA	NA	NA	NA	NA
s18v1_35186	1026	2	0	0	No	NA	NA	NA	NA	NA	NA	NA	NA
s18v1_35208	1388	2	0	0	No	NA	NA	NA	NA	NA	NA	NA	NA
s18v1_35221	1574	3	0	2	No	NA	NA	NA	NA	NA	NA	NA	NA
s18v1_35246	1224	1	0	1	No	NA	NA	NA	NA	NA	NA	NA	NA
s18v1_35301	3976	6	0	1	No	NA	NA	NA	NA	NA	NA	NA	NA
s18v1_35322	1014	2	0	2	No	NA	NA	NA	NA	NA	NA	NA	NA
s18v1_35392	1295	3	0	1	No	NA	NA	NA	NA	NA	NA	NA	NA
s18v1_35417	1270	2	0	0	No	NA	NA	NA	NA	NA	NA	NA	NA
s18v1_35662	1202	1	0	1	No	NA	NA	NA	NA	NA	NA	NA	NA
s18v1_35701	2243	2	0	1	No	NA	NA	NA	NA	NA	NA	NA	NA
s18v1_35813	1081	4	2	0	No	NA	NA	NA	NA	NA	NA	NA	NA
s18v1_35829	1316	3	0	1	No	NA	NA	NA	NA	NA	NA	NA	NA
s18v1_35892	1155	1	0	1	No	NA	NA	NA	NA	NA	NA	NA	NA
s18v1_35963	6051	5	1	0	No	NA	NA	NA	NA	NA	NA	NA	NA
s18v1_35984	1217	2	0	0	No	NA	NA	NA	NA	NA	NA	NA	NA
s18v1_36118	1564	2	0	1	No	NA	NA	NA	NA	NA	NA	NA	NA
s18v1_36213	2816	5	0	0	No	NA	NA	NA	NA	NA	NA	NA	NA
s18v1_36347	3744	4	0	3	No	NA	NA	NA	NA	NA	NA	NA	NA
s18v1_36376	1340	2	0	1	No	NA	NA	NA	NA	NA	NA	NA	NA
s18v1_36409	3625	3	0	2	No	NA	NA	NA	NA	NA	NA	NA	NA
s18v1_36463	1387	2	0	0	No	NA	NA	NA	NA	NA	NA	NA	NA
s18v1_36464	1984	3	0	1	No	NA	NA	NA	NA	NA	NA	NA	NA
s18v1_36473	1115	2	0	0	No	NA	NA	NA	NA	NA	NA	NA	NA
s18v1_36609	1075	1	0	1	No	NA	NA	NA	NA	NA	NA	NA	NA
s18v1_36641	135400	177	37	5	No	NA	NA	NA	NA	NA	NA	NA	NA
s18v1_36713	4331	4	0	4	No	NA	NA	NA	NA	NA	NA	NA	NA
s18v1_36717	1665	2	0	2	No	NA	NA	NA	NA	NA	NA	NA	NA
s18v1_36741	1465	2	0	1	No	NA	NA	NA	NA	NA	NA	NA	NA
s18v1_37056	1856	3	0	1	No	NA	NA	NA	NA	NA	NA	NA	NA
s18v1_37098	4305	3	0	2	No	NA	NA	NA	NA	NA	NA	NA	NA
s18v1_37138	1377	1	0	1	No	NA	NA	NA	NA	NA	NA	NA	NA
s18v1_37147	1120	1	0	0	No	NA	NA	NA	NA	NA	NA	NA	NA
s18v1_37150	2158	2	0	2	No	NA	NA	NA	NA	NA	NA	NA	NA
s18v1_37163	1102	1	0	0	No	NA	NA	NA	NA	NA	NA	NA	NA
s18v1_37267	3225	3	0	2	No	NA	NA	NA	NA	NA	NA	NA	NA
s18v1_37290	1068	2	0	0	No	NA	NA	NA	NA	NA	NA	NA	NA
s18v1_37349	1565	1	0	0	No	NA	NA	NA	NA	NA	NA	NA	NA
s18v1_37461	53636	79	12	0	No	NA	NA	NA	NA	NA	NA	NA	NA
s18v1_37473	1148	2	0	0	No	NA	NA	NA	NA	NA	NA	NA	NA
s18v1_37492	1069	1	0	1	No	NA	NA	NA	NA	NA	NA	NA	NA
s18v1_37566	1070	2	0	0	No	NA	NA	NA	NA	NA	NA	NA	NA
s18v1_37620	1919	2	0	1	No	NA	NA	NA	NA	NA	NA	NA	NA
s18v1_37635	49496	80	20	0	No	NA	NA	NA	NA	NA	NA	NA	NA
s18v1_37650	1423	1	0	0	No	NA	NA	NA	NA	NA	NA	NA	NA
s18v1_37693	32504	39	12	0	No	NA	NA	NA	NA	NA	NA	NA	NA
s18v1_37818	1073	3	0	2	No	NA	NA	NA	NA	NA	NA	NA	NA
s18v1_37887	1285	2	0	1	No	NA	NA	NA	NA	NA	NA	NA	NA
s18v1_37905	1128	1	0	1	No	NA	NA	NA	NA	NA	NA	NA	NA
s18v1_37921	3206	5	1	0	No	NA	NA	NA	NA	NA	NA	NA	NA
s18v1_38186	1198	1	0	1	No	NA	NA	NA	NA	NA	NA	NA	NA
s18v1_38307	1169	1	0	0	No	NA	NA	NA	NA	NA	NA	NA	NA
s18v1_38394	1393	1	0	0	No	NA	NA	NA	NA	NA	NA	NA	NA
s18v1_38428	5120	12	2	0	No	NA	NA	NA	NA	NA	NA	NA	NA
s18v1_38615	1161	2	0	0	No	NA	NA	NA	NA	NA	NA	NA	NA
s18v1_38884	1642	4	0	1	No	NA	NA	NA	NA	NA	NA	NA	NA
s18v1_38917	9398	10	0	4	No	NA	NA	NA	NA	NA	NA	NA	NA
s18v1_38972	1473	5	3	0	No	NA	NA	NA	NA	NA	NA	NA	NA
s18v1_39006	2276	7	2	0	No	NA	NA	NA	NA	NA	NA	NA	NA
s18v1_39068	1363	1	0	1	No	NA	NA	NA	NA	NA	NA	NA	NA
s18v1_39086	1123	2	0	0	No	NA	NA	NA	NA	NA	NA	NA	NA
s18v1_39099	2100	4	0	3	No	NA	NA	NA	NA	NA	NA	NA	NA
s18v1_39106	1263	3	0	2	No	NA	NA	NA	NA	NA	NA	NA	NA
s18v1_39113	5583	12	3	0	No	NA	NA	NA	NA	NA	NA	NA	NA
s18v1_39157	1214	3	0	1	No	NA	NA	NA	NA	NA	NA	NA	NA
s18v1_39162	1554	3	0	3	No	NA	NA	NA	NA	NA	NA	NA	NA
s18v1_39205	1094	1	0	0	No	NA	NA	NA	NA	NA	NA	NA	NA
s18v1_39339	1460	1	0	1	No	NA	NA	NA	NA	NA	NA	NA	NA
s18v1_39394	1035	2	0	0	No	NA	NA	NA	NA	NA	NA	NA	NA
s18v1_39439	2297	7	2	0	No	NA	NA	NA	NA	NA	NA	NA	NA
s18v1_39716	1099	3	0	3	No	NA	NA	NA	NA	NA	NA	NA	NA
s18v1_39930	1149	4	0	0	No	NA	NA	NA	NA	NA	NA	NA	NA
s18v1_39936	1233	1	0	1	No	NA	NA	NA	NA	NA	NA	NA	NA
s18v1_39997	1483	2	0	2	No	NA	NA	NA	NA	NA	NA	NA	NA
s18v1_40045	1098	5	0	0	No	NA	NA	NA	NA	NA	NA	NA	NA
s18v1_40269	1019	1	0	0	No	NA	NA	NA	NA	NA	NA	NA	NA
s18v1_40275	1229	2	0	1	No	NA	NA	NA	NA	NA	NA	NA	NA
s18v1_40277	1885	1	0	0	No	NA	NA	NA	NA	NA	NA	NA	NA
s18v1_40386	1221	2	0	2	No	NA	NA	NA	NA	NA	NA	NA	NA
s18v1_40389	1848	8	0	0	No	NA	NA	NA	NA	NA	NA	NA	NA
s18v1_40393	2024	3	0	1	No	NA	NA	NA	NA	NA	NA	NA	NA
s18v1_40458	3664	5	0	4	No	NA	NA	NA	NA	NA	NA	NA	NA
s18v1_40494	1158	2	0	1	No	NA	NA	NA	NA	NA	NA	NA	NA
s18v1_40611	1125	2	0	1	No	NA	NA	NA	NA	NA	NA	NA	NA
s18v1_40638	4055	9	0	0	No	NA	NA	NA	NA	NA	NA	NA	NA
s18v1_40650	1216	2	0	0	No	NA	NA	NA	NA	NA	NA	NA	NA
s18v1_40658	2090	1	0	0	No	NA	NA	NA	NA	NA	NA	NA	NA
s18v1_40721	1075	2	0	1	No	NA	NA	NA	NA	NA	NA	NA	NA
s18v1_40736	1630	2	0	2	No	NA	NA	NA	NA	NA	NA	NA	NA
s18v1_40763	1395	2	0	2	No	NA	NA	NA	NA	NA	NA	NA	NA
s18v1_40766	1141	2	0	0	No	NA	NA	NA	NA	NA	NA	NA	NA
s18v1_40822	1315	2	0	1	No	NA	NA	NA	NA	NA	NA	NA	NA
s18v1_40829	1133	3	1	0	No	NA	NA	NA	NA	NA	NA	NA	NA
s18v1_40961	1074	1	0	1	No	NA	NA	NA	NA	NA	NA	NA	NA
s18v1_41033	1137	3	1	0	No	NA	NA	NA	NA	NA	NA	NA	NA
s18v1_41176	3297	5	1	0	No	NA	NA	NA	NA	NA	NA	NA	NA
s18v1_41279	1022	2	0	1	No	NA	NA	NA	NA	NA	NA	NA	NA
s18v1_41754	4021	3	0	0	No	NA	NA	NA	NA	NA	NA	NA	NA
s18v1_41974	3166	4	0	0	No	NA	NA	NA	NA	NA	NA	NA	NA
s18v1_42028	1123	2	0	0	No	NA	NA	NA	NA	NA	NA	NA	NA
s18v1_42074	36484	50	20	0	No	NA	NA	NA	NA	NA	NA	NA	NA
s18v1_42282	1520	3	0	3	No	NA	NA	NA	NA	NA	NA	NA	NA
s18v1_42359	1326	1	0	1	No	NA	NA	NA	NA	NA	NA	NA	NA
s18v1_42389	1215	2	0	0	No	NA	NA	NA	NA	NA	NA	NA	NA
s18v1_42400	1013	1	0	1	No	NA	NA	NA	NA	NA	NA	NA	NA
s18v1_42418	1032	2	0	2	No	NA	NA	NA	NA	NA	NA	NA	NA
s18v1_42613	2266	5	1	1	Yes	627	1639	host,viral	1639627	1-1639,1640-2266	1-3,4-5	0,1	1,0
s18v1_42717	1611	2	0	1	No	NA	NA	NA	NA	NA	NA	NA	NA
s18v1_42799	4020	4	1	0	No	NA	NA	NA	NA	NA	NA	NA	NA
s18v1_43036	4244	4	1	1	Yes	3171	1073	viral,host	31711073	1-3171,3172-4244	1-2,3-4	1,0	0,1
s18v1_43059	64399	80	14	1	No	NA	NA	NA	NA	NA	NA	NA	NA
s18v1_43064	1833	2	0	2	No	NA	NA	NA	NA	NA	NA	NA	NA
s18v1_43339	1460	2	0	2	No	NA	NA	NA	NA	NA	NA	NA	NA
s18v1_43370	1203	2	0	1	No	NA	NA	NA	NA	NA	NA	NA	NA
s18v1_43409	1693	3	0	2	No	NA	NA	NA	NA	NA	NA	NA	NA
s18v1_43516	2526	1	0	1	No	NA	NA	NA	NA	NA	NA	NA	NA
s18v1_43586	1410	1	0	1	No	NA	NA	NA	NA	NA	NA	NA	NA
s18v1_43598	1137	2	0	1	No	NA	NA	NA	NA	NA	NA	NA	NA
s18v1_43702	1798	1	0	0	No	NA	NA	NA	NA	NA	NA	NA	NA
s18v1_43720	1364	1	0	0	No	NA	NA	NA	NA	NA	NA	NA	NA
s18v1_43976	1255	1	0	0	No	NA	NA	NA	NA	NA	NA	NA	NA
s18v1_44035	2028	4	0	0	No	NA	NA	NA	NA	NA	NA	NA	NA
s18v1_44048	1031	1	0	0	No	NA	NA	NA	NA	NA	NA	NA	NA
s18v1_44055	1031	3	0	3	No	NA	NA	NA	NA	NA	NA	NA	NA
s18v1_44340	6456	3	0	0	No	NA	NA	NA	NA	NA	NA	NA	NA
s18v1_44383	1108	1	0	0	No	NA	NA	NA	NA	NA	NA	NA	NA
s18v1_44457	1012	1	0	1	No	NA	NA	NA	NA	NA	NA	NA	NA
s18v1_44601	1456	3	0	1	No	NA	NA	NA	NA	NA	NA	NA	NA
s18v1_44777	1400	1	0	1	No	NA	NA	NA	NA	NA	NA	NA	NA
s18v1_44908	2176	1	0	1	No	NA	NA	NA	NA	NA	NA	NA	NA
s18v1_45133	1014	3	0	0	No	NA	NA	NA	NA	NA	NA	NA	NA
s18v1_45235	1121	2	0	2	No	NA	NA	NA	NA	NA	NA	NA	NA
s18v1_45501	2173	2	0	0	No	NA	NA	NA	NA	NA	NA	NA	NA
s18v1_45549	1378	1	0	1	No	NA	NA	NA	NA	NA	NA	NA	NA
s18v1_45564	2526	6	0	5	No	NA	NA	NA	NA	NA	NA	NA	NA
s18v1_45749	1400	4	0	0	No	NA	NA	NA	NA	NA	NA	NA	NA
s18v1_45768	1255	1	0	1	No	NA	NA	NA	NA	NA	NA	NA	NA
s18v1_45788	1140	1	0	0	No	NA	NA	NA	NA	NA	NA	NA	NA
s18v1_45858	1125	3	0	0	No	NA	NA	NA	NA	NA	NA	NA	NA
s18v1_45913	3700	3	0	2	No	NA	NA	NA	NA	NA	NA	NA	NA
s18v1_45931	1852	4	0	3	No	NA	NA	NA	NA	NA	NA	NA	NA
s18v1_45969	1142	1	0	1	No	NA	NA	NA	NA	NA	NA	NA	NA
s18v1_45975	1450	3	0	0	No	NA	NA	NA	NA	NA	NA	NA	NA
s18v1_46254	3055	3	3	0	No	NA	NA	NA	NA	NA	NA	NA	NA
s18v1_46448	1361	2	0	1	No	NA	NA	NA	NA	NA	NA	NA	NA
s18v1_46529	1348	2	0	0	No	NA	NA	NA	NA	NA	NA	NA	NA
s18v1_46694	3485	2	0	0	No	NA	NA	NA	NA	NA	NA	NA	NA
s18v1_46891	3142	4	0	2	No	NA	NA	NA	NA	NA	NA	NA	NA
s18v1_46964	1051	3	0	0	No	NA	NA	NA	NA	NA	NA	NA	NA
s18v1_47267	2360	2	0	0	No	NA	NA	NA	NA	NA	NA	NA	NA
s18v1_47314	1888	1	0	1	No	NA	NA	NA	NA	NA	NA	NA	NA
s18v1_47343	4223	4	1	1	Yes	3150	1073	viral,host	31501073	1-3150,3151-4223	1-2,3-4	1,0	0,1
s18v1_47401	1008	2	0	1	No	NA	NA	NA	NA	NA	NA	NA	NA
s18v1_47449	5367	6	0	2	No	NA	NA	NA	NA	NA	NA	NA	NA
s18v1_47619	1281	3	0	3	No	NA	NA	NA	NA	NA	NA	NA	NA
s18v1_47636	1409	1	0	1	No	NA	NA	NA	NA	NA	NA	NA	NA
s18v1_47754	1044	1	0	0	No	NA	NA	NA	NA	NA	NA	NA	NA
s18v1_47935	2920	5	0	2	No	NA	NA	NA	NA	NA	NA	NA	NA
s18v1_48012	2633	1	0	1	No	NA	NA	NA	NA	NA	NA	NA	NA
s18v1_48025	1513	1	0	1	No	NA	NA	NA	NA	NA	NA	NA	NA
s18v1_48298	1313	3	0	2	No	NA	NA	NA	NA	NA	NA	NA	NA
s18v1_48547	1267	1	0	0	No	NA	NA	NA	NA	NA	NA	NA	NA
s18v1_48596	1260	3	2	0	No	NA	NA	NA	NA	NA	NA	NA	NA
s18v1_48665	1025	2	0	0	No	NA	NA	NA	NA	NA	NA	NA	NA
s18v1_48693	3400	3	0	3	No	NA	NA	NA	NA	NA	NA	NA	NA
s18v1_48752	9446	12	0	1	No	NA	NA	NA	NA	NA	NA	NA	NA
s18v1_48870	1058	1	0	0	No	NA	NA	NA	NA	NA	NA	NA	NA
s18v1_48873	1322	1	0	1	No	NA	NA	NA	NA	NA	NA	NA	NA
s18v1_48900	1806	2	0	1	No	NA	NA	NA	NA	NA	NA	NA	NA
s18v1_49029	1923	1	0	0	No	NA	NA	NA	NA	NA	NA	NA	NA
s18v1_49193	1573	2	0	2	No	NA	NA	NA	NA	NA	NA	NA	NA
s18v1_49278	4156	3	0	0	No	NA	NA	NA	NA	NA	NA	NA	NA
s18v1_49320	1287	2	0	2	No	NA	NA	NA	NA	NA	NA	NA	NA
s18v1_49343	3874	3	0	0	No	NA	NA	NA	NA	NA	NA	NA	NA
s18v1_49380	2245	2	0	0	No	NA	NA	NA	NA	NA	NA	NA	NA
s18v1_49386	1550	1	0	1	No	NA	NA	NA	NA	NA	NA	NA	NA
s18v1_49507	1468	3	0	0	No	NA	NA	NA	NA	NA	NA	NA	NA
s18v1_49711	1680	4	0	0	No	NA	NA	NA	NA	NA	NA	NA	NA
s18v1_49730	1308	2	0	2	No	NA	NA	NA	NA	NA	NA	NA	NA
s18v1_49743	1466	2	0	0	No	NA	NA	NA	NA	NA	NA	NA	NA
s18v1_49777	1216	1	0	1	No	NA	NA	NA	NA	NA	NA	NA	NA
s18v1_49781	91647	84	10	0	No	NA	NA	NA	NA	NA	NA	NA	NA
s18v1_50052	1210	2	0	0	No	NA	NA	NA	NA	NA	NA	NA	NA
s18v1_50071	1078	3	0	0	No	NA	NA	NA	NA	NA	NA	NA	NA
s18v1_50201	1326	2	0	1	No	NA	NA	NA	NA	NA	NA	NA	NA
s18v1_50249	1878	2	0	2	No	NA	NA	NA	NA	NA	NA	NA	NA
s18v1_50262	1485	2	0	1	No	NA	NA	NA	NA	NA	NA	NA	NA
s18v1_50289	2058	1	1	0	No	NA	NA	NA	NA	NA	NA	NA	NA
s18v1_50335	2362	3	0	0	No	NA	NA	NA	NA	NA	NA	NA	NA
s18v1_50401	1501	1	0	1	No	NA	NA	NA	NA	NA	NA	NA	NA
s18v1_50403	3106	4	0	3	No	NA	NA	NA	NA	NA	NA	NA	NA
s18v1_50404	1157	2	0	2	No	NA	NA	NA	NA	NA	NA	NA	NA
s18v1_50434	2345	1	0	0	No	NA	NA	NA	NA	NA	NA	NA	NA
s18v1_50505	4599	4	0	4	No	NA	NA	NA	NA	NA	NA	NA	NA
s18v1_50513	1128	2	0	0	No	NA	NA	NA	NA	NA	NA	NA	NA
s18v1_50533	1391	1	0	1	No	NA	NA	NA	NA	NA	NA	NA	NA
s18v1_50657	1156	2	0	2	No	NA	NA	NA	NA	NA	NA	NA	NA
s18v1_50670	5248	7	0	1	No	NA	NA	NA	NA	NA	NA	NA	NA
s18v1_50703	1596	1	0	0	No	NA	NA	NA	NA	NA	NA	NA	NA
s18v1_50758	1498	2	0	0	No	NA	NA	NA	NA	NA	NA	NA	NA
s18v1_50801	1790	2	0	1	No	NA	NA	NA	NA	NA	NA	NA	NA
s18v1_50811	2005	2	0	1	No	NA	NA	NA	NA	NA	NA	NA	NA
s18v1_51020	1648	4	0	0	No	NA	NA	NA	NA	NA	NA	NA	NA
s18v1_51031	1899	1	0	1	No	NA	NA	NA	NA	NA	NA	NA	NA
s18v1_51051	1199	1	0	1	No	NA	NA	NA	NA	NA	NA	NA	NA
s18v1_51258	3947	7	2	1	Yes	2156	1791	host,viral	17912156	1-1791,1792-3947	1-3,4-7	0,2	1,0
s18v1_51303	3524	4	0	0	No	NA	NA	NA	NA	NA	NA	NA	NA
s18v1_51373	10825	14	0	6	No	NA	NA	NA	NA	NA	NA	NA	NA
s18v1_51377	2230	1	0	0	No	NA	NA	NA	NA	NA	NA	NA	NA
s18v1_51451	1236	2	0	1	No	NA	NA	NA	NA	NA	NA	NA	NA
s18v1_51589	1252	2	0	1	No	NA	NA	NA	NA	NA	NA	NA	NA
s18v1_51606	4393	6	0	4	No	NA	NA	NA	NA	NA	NA	NA	NA
s18v1_51810	1293	2	0	0	No	NA	NA	NA	NA	NA	NA	NA	NA
s18v1_51851	1016	1	0	1	No	NA	NA	NA	NA	NA	NA	NA	NA
s18v1_51861	2315	1	0	1	No	NA	NA	NA	NA	NA	NA	NA	NA
s18v1_51919	1162	1	0	0	No	NA	NA	NA	NA	NA	NA	NA	NA
s18v1_52027	1320	1	0	1	No	NA	NA	NA	NA	NA	NA	NA	NA
s18v1_52042	1110	2	0	1	No	NA	NA	NA	NA	NA	NA	NA	NA
s18v1_52090	3692	7	0	0	No	NA	NA	NA	NA	NA	NA	NA	NA
s18v1_52145	1011	1	0	0	No	NA	NA	NA	NA	NA	NA	NA	NA
s18v1_52162	2564	2	0	0	No	NA	NA	NA	NA	NA	NA	NA	NA
s18v1_52221	1068	1	0	1	No	NA	NA	NA	NA	NA	NA	NA	NA
s18v1_52303	5444	6	0	3	No	NA	NA	NA	NA	NA	NA	NA	NA
s18v1_52324	1029	1	0	0	No	NA	NA	NA	NA	NA	NA	NA	NA
s18v1_52442	1578	5	0	5	No	NA	NA	NA	NA	NA	NA	NA	NA
s18v1_52520	1172	2	0	0	No	NA	NA	NA	NA	NA	NA	NA	NA
s18v1_52665	1173	1	0	1	No	NA	NA	NA	NA	NA	NA	NA	NA
s18v1_52783	1500	4	0	0	No	NA	NA	NA	NA	NA	NA	NA	NA
s18v1_52886	1643	2	0	2	No	NA	NA	NA	NA	NA	NA	NA	NA
s18v1_52961	2034	1	0	0	No	NA	NA	NA	NA	NA	NA	NA	NA
s18v1_52966	1132	1	0	1	No	NA	NA	NA	NA	NA	NA	NA	NA
s18v1_53056	1289	2	0	2	No	NA	NA	NA	NA	NA	NA	NA	NA
s18v1_53060	4531	6	0	0	No	NA	NA	NA	NA	NA	NA	NA	NA
s18v1_53141	1343	1	0	1	No	NA	NA	NA	NA	NA	NA	NA	NA
s18v1_53325	1892	3	2	0	No	NA	NA	NA	NA	NA	NA	NA	NA
s18v1_53391	2582	4	0	4	No	NA	NA	NA	NA	NA	NA	NA	NA
s18v1_53451	1017	2	0	2	No	NA	NA	NA	NA	NA	NA	NA	NA
s18v1_53460	1169	2	0	1	No	NA	NA	NA	NA	NA	NA	NA	NA
s18v1_53594	1458	1	0	0	No	NA	NA	NA	NA	NA	NA	NA	NA
s18v1_53735	3252	11	0	0	No	NA	NA	NA	NA	NA	NA	NA	NA
s18v1_53829	5157	3	0	2	No	NA	NA	NA	NA	NA	NA	NA	NA
s18v1_53945	4575	5	0	5	No	NA	NA	NA	NA	NA	NA	NA	NA
s18v1_53976	1995	2	0	0	No	NA	NA	NA	NA	NA	NA	NA	NA
s18v1_54067	2397	2	2	0	No	NA	NA	NA	NA	NA	NA	NA	NA
s18v1_54089	2085	4	0	4	No	NA	NA	NA	NA	NA	NA	NA	NA
s18v1_54379	1335	5	1	0	No	NA	NA	NA	NA	NA	NA	NA	NA
s18v1_54380	3435	2	0	2	No	NA	NA	NA	NA	NA	NA	NA	NA
s18v1_54525	3899	3	1	1	Yes	2694	1205	host,viral	12052694	1-1205,1206-3899	1-2,3-3	0,1	1,0
s18v1_54535	2476	4	0	4	No	NA	NA	NA	NA	NA	NA	NA	NA
s18v1_54644	1551	2	0	2	No	NA	NA	NA	NA	NA	NA	NA	NA
s18v1_54661	1146	4	0	0	No	NA	NA	NA	NA	NA	NA	NA	NA
s18v1_54700	1015	1	0	1	No	NA	NA	NA	NA	NA	NA	NA	NA
s18v1_54726	1393	2	0	2	No	NA	NA	NA	NA	NA	NA	NA	NA
s18v1_54752	1005	2	0	2	No	NA	NA	NA	NA	NA	NA	NA	NA
s18v1_54757	1000	2	0	1	No	NA	NA	NA	NA	NA	NA	NA	NA
s18v1_54763	1240	2	0	0	No	NA	NA	NA	NA	NA	NA	NA	NA
s18v1_54804	1105	4	0	3	No	NA	NA	NA	NA	NA	NA	NA	NA
s18v1_54991	1453	3	0	0	No	NA	NA	NA	NA	NA	NA	NA	NA
s18v1_55110	1846	2	0	0	No	NA	NA	NA	NA	NA	NA	NA	NA
s18v1_55175	1775	4	0	3	No	NA	NA	NA	NA	NA	NA	NA	NA
s18v1_55350	4027	3	0	2	No	NA	NA	NA	NA	NA	NA	NA	NA
s18v1_55376	1056	1	0	1	No	NA	NA	NA	NA	NA	NA	NA	NA
s18v1_55388	1500	2	0	1	No	NA	NA	NA	NA	NA	NA	NA	NA
s18v1_55543	1510	2	0	1	No	NA	NA	NA	NA	NA	NA	NA	NA
s18v1_55724	1096	1	0	1	No	NA	NA	NA	NA	NA	NA	NA	NA
s18v1_55730	3473	2	0	2	No	NA	NA	NA	NA	NA	NA	NA	NA
s18v1_55733	1589	2	0	1	No	NA	NA	NA	NA	NA	NA	NA	NA
s18v1_55740	1182	1	0	1	No	NA	NA	NA	NA	NA	NA	NA	NA
s18v1_55753	4613	3	1	0	No	NA	NA	NA	NA	NA	NA	NA	NA
s18v1_55765	1468	1	0	0	No	NA	NA	NA	NA	NA	NA	NA	NA
s18v1_55825	3128	3	0	0	No	NA	NA	NA	NA	NA	NA	NA	NA
s18v1_55870	1106	2	0	0	No	NA	NA	NA	NA	NA	NA	NA	NA
s18v1_55885	4703	4	0	4	No	NA	NA	NA	NA	NA	NA	NA	NA
s18v1_55904	6026	5	0	1	No	NA	NA	NA	NA	NA	NA	NA	NA
s18v1_55915	4751	5	0	3	No	NA	NA	NA	NA	NA	NA	NA	NA
s18v1_55965	6787	9	0	3	No	NA	NA	NA	NA	NA	NA	NA	NA
s18v1_55969	10646	14	3	1	No	NA	NA	NA	NA	NA	NA	NA	NA
s18v1_56144	1546	4	0	4	No	NA	NA	NA	NA	NA	NA	NA	NA
s18v1_56179	1301	2	0	1	No	NA	NA	NA	NA	NA	NA	NA	NA
s18v1_56252	2093	3	0	2	No	NA	NA	NA	NA	NA	NA	NA	NA
s18v1_56348	2031	2	0	2	No	NA	NA	NA	NA	NA	NA	NA	NA
s18v1_56504	1333	2	0	2	No	NA	NA	NA	NA	NA	NA	NA	NA
s18v1_56512	1176	2	2	0	No	NA	NA	NA	NA	NA	NA	NA	NA
s18v1_56529	1990	1	0	1	No	NA	NA	NA	NA	NA	NA	NA	NA
s18v1_56701	1769	1	0	1	No	NA	NA	NA	NA	NA	NA	NA	NA
s18v1_56755	1671	1	0	1	No	NA	NA	NA	NA	NA	NA	NA	NA
s18v1_56773	1533	2	0	2	No	NA	NA	NA	NA	NA	NA	NA	NA
s18v1_56915	3173	4	0	3	No	NA	NA	NA	NA	NA	NA	NA	NA
s18v1_56986	1025	2	0	1	No	NA	NA	NA	NA	NA	NA	NA	NA
s18v1_57017	1045	1	0	0	No	NA	NA	NA	NA	NA	NA	NA	NA
s18v1_57058	1290	1	0	1	No	NA	NA	NA	NA	NA	NA	NA	NA
s18v1_57113	1351	1	0	0	No	NA	NA	NA	NA	NA	NA	NA	NA
s18v1_57127	1343	2	0	0	No	NA	NA	NA	NA	NA	NA	NA	NA
s18v1_57210	1053	2	0	1	No	NA	NA	NA	NA	NA	NA	NA	NA
s18v1_57425	1415	1	0	0	No	NA	NA	NA	NA	NA	NA	NA	NA
s18v1_57622	77538	131	17	2	No	NA	NA	NA	NA	NA	NA	NA	NA
s18v1_57756	1418	3	0	0	No	NA	NA	NA	NA	NA	NA	NA	NA
s18v1_57925	3773	3	0	2	No	NA	NA	NA	NA	NA	NA	NA	NA
s18v1_57966	1333	3	0	2	No	NA	NA	NA	NA	NA	NA	NA	NA
s18v1_57997	1304	1	0	1	No	NA	NA	NA	NA	NA	NA	NA	NA
s18v1_58106	63218	105	26	0	No	NA	NA	NA	NA	NA	NA	NA	NA
s18v1_58113	5123	7	0	1	No	NA	NA	NA	NA	NA	NA	NA	NA
s18v1_58229	4504	4	0	0	No	NA	NA	NA	NA	NA	NA	NA	NA
s18v1_58329	1997	2	0	1	No	NA	NA	NA	NA	NA	NA	NA	NA
s18v1_58455	1267	3	0	0	No	NA	NA	NA	NA	NA	NA	NA	NA
s18v1_58587	1148	3	0	0	No	NA	NA	NA	NA	NA	NA	NA	NA
s18v1_58595	6760	7	4	0	No	NA	NA	NA	NA	NA	NA	NA	NA
s18v1_58681	1369	2	0	0	No	NA	NA	NA	NA	NA	NA	NA	NA
s18v1_58711	1090	1	0	1	No	NA	NA	NA	NA	NA	NA	NA	NA
s18v1_58737	1133	1	0	1	No	NA	NA	NA	NA	NA	NA	NA	NA
s18v1_58942	2029	3	0	0	No	NA	NA	NA	NA	NA	NA	NA	NA
s18v1_59110	2421	5	0	0	No	NA	NA	NA	NA	NA	NA	NA	NA
s18v1_59312	4236	2	0	2	No	NA	NA	NA	NA	NA	NA	NA	NA
s18v1_59314	1065	2	0	0	No	NA	NA	NA	NA	NA	NA	NA	NA
s18v1_59374	1437	4	0	0	No	NA	NA	NA	NA	NA	NA	NA	NA
s18v1_59383	7843	9	1	0	No	NA	NA	NA	NA	NA	NA	NA	NA
s18v1_59413	2904	6	0	4	No	NA	NA	NA	NA	NA	NA	NA	NA
s18v1_59537	1119	2	0	2	No	NA	NA	NA	NA	NA	NA	NA	NA
s18v1_59615	1906	2	0	0	No	NA	NA	NA	NA	NA	NA	NA	NA
s18v1_59738	3842	9	2	0	No	NA	NA	NA	NA	NA	NA	NA	NA
s18v1_59748	1084	2	0	0	No	NA	NA	NA	NA	NA	NA	NA	NA
s18v1_59915	1087	2	0	2	No	NA	NA	NA	NA	NA	NA	NA	NA
s18v1_59930	1162	1	0	0	No	NA	NA	NA	NA	NA	NA	NA	NA
s18v1_60155	1159	2	0	1	No	NA	NA	NA	NA	NA	NA	NA	NA
s18v1_60162	8461	15	5	0	No	NA	NA	NA	NA	NA	NA	NA	NA
s18v1_60224	4005	7	0	4	No	NA	NA	NA	NA	NA	NA	NA	NA
s18v1_60283	43997	69	15	0	No	NA	NA	NA	NA	NA	NA	NA	NA
s18v1_60318	2677	3	0	2	No	NA	NA	NA	NA	NA	NA	NA	NA
s18v1_60337	1802	2	0	0	No	NA	NA	NA	NA	NA	NA	NA	NA
s18v1_60354	1126	1	0	1	No	NA	NA	NA	NA	NA	NA	NA	NA
s18v1_60356	2463	1	0	1	No	NA	NA	NA	NA	NA	NA	NA	NA
s18v1_60377	3049	3	0	0	No	NA	NA	NA	NA	NA	NA	NA	NA
s18v1_60457	1010	3	0	1	No	NA	NA	NA	NA	NA	NA	NA	NA
s18v1_60466	54183	96	20	1	No	NA	NA	NA	NA	NA	NA	NA	NA
s18v1_60536	2179	5	0	0	No	NA	NA	NA	NA	NA	NA	NA	NA
s18v1_60609	1906	1	0	1	No	NA	NA	NA	NA	NA	NA	NA	NA
s18v1_60668	1567	2	0	0	No	NA	NA	NA	NA	NA	NA	NA	NA
s18v1_60677	1127	1	0	1	No	NA	NA	NA	NA	NA	NA	NA	NA
s18v1_60778	1079	2	0	0	No	NA	NA	NA	NA	NA	NA	NA	NA
s18v1_60784	4464	5	0	2	No	NA	NA	NA	NA	NA	NA	NA	NA
s18v1_60813	1087	2	1	0	No	NA	NA	NA	NA	NA	NA	NA	NA
s18v1_60955	1451	2	0	0	No	NA	NA	NA	NA	NA	NA	NA	NA
s18v1_61005	1670	2	0	2	No	NA	NA	NA	NA	NA	NA	NA	NA
s18v1_61118	1495	4	0	0	No	NA	NA	NA	NA	NA	NA	NA	NA
s18v1_61129	2126	1	0	1	No	NA	NA	NA	NA	NA	NA	NA	NA
s18v1_61140	1249	1	0	0	No	NA	NA	NA	NA	NA	NA	NA	NA
s18v1_61142	1421	2	0	1	No	NA	NA	NA	NA	NA	NA	NA	NA
s18v1_61212	3866	10	2	0	No	NA	NA	NA	NA	NA	NA	NA	NA
s18v1_61274	1387	2	0	1	No	NA	NA	NA	NA	NA	NA	NA	NA
s18v1_61349	1314	1	0	1	No	NA	NA	NA	NA	NA	NA	NA	NA
s18v1_61368	1463	2	0	1	No	NA	NA	NA	NA	NA	NA	NA	NA
s18v1_61371	2216	1	0	1	No	NA	NA	NA	NA	NA	NA	NA	NA
s18v1_61421	3864	5	0	3	No	NA	NA	NA	NA	NA	NA	NA	NA
s18v1_61455	1710	2	0	1	No	NA	NA	NA	NA	NA	NA	NA	NA
s18v1_61572	1779	3	0	3	No	NA	NA	NA	NA	NA	NA	NA	NA
s18v1_61600	7651	5	1	0	No	NA	NA	NA	NA	NA	NA	NA	NA
s18v1_61655	1070	2	0	2	No	NA	NA	NA	NA	NA	NA	NA	NA
s18v1_61830	1719	2	0	0	No	NA	NA	NA	NA	NA	NA	NA	NA
s18v1_61918	1372	1	0	1	No	NA	NA	NA	NA	NA	NA	NA	NA
s18v1_61927	1381	1	0	1	No	NA	NA	NA	NA	NA	NA	NA	NA
s18v1_61934	1141	1	0	0	No	NA	NA	NA	NA	NA	NA	NA	NA
s18v1_61989	1370	4	0	0	No	NA	NA	NA	NA	NA	NA	NA	NA
s18v1_62052	1130	1	0	1	No	NA	NA	NA	NA	NA	NA	NA	NA
s18v1_62068	1009	1	0	0	No	NA	NA	NA	NA	NA	NA	NA	NA
s18v1_62112	1310	2	0	0	No	NA	NA	NA	NA	NA	NA	NA	NA
s18v1_62205	1011	1	0	1	No	NA	NA	NA	NA	NA	NA	NA	NA
s18v1_62210	1257	1	0	1	No	NA	NA	NA	NA	NA	NA	NA	NA
s18v1_62413	1009	1	0	0	No	NA	NA	NA	NA	NA	NA	NA	NA
s18v1_62415	1529	2	0	2	No	NA	NA	NA	NA	NA	NA	NA	NA
s18v1_62467	1004	2	0	1	No	NA	NA	NA	NA	NA	NA	NA	NA
s18v1_62483	1266	1	0	1	No	NA	NA	NA	NA	NA	NA	NA	NA
s18v1_62703	1567	5	0	4	No	NA	NA	NA	NA	NA	NA	NA	NA
s18v1_62721	1272	2	0	1	No	NA	NA	NA	NA	NA	NA	NA	NA
s18v1_62748	1028	1	0	0	No	NA	NA	NA	NA	NA	NA	NA	NA
s18v1_62838	1279	3	0	0	No	NA	NA	NA	NA	NA	NA	NA	NA
s18v1_62856	53032	63	13	1	No	NA	NA	NA	NA	NA	NA	NA	NA
s18v1_62933	2173	3	0	2	No	NA	NA	NA	NA	NA	NA	NA	NA
s18v1_62956	1110	2	0	1	No	NA	NA	NA	NA	NA	NA	NA	NA
s18v1_63112	1114	1	0	0	No	NA	NA	NA	NA	NA	NA	NA	NA
s18v1_63243	1259	2	0	2	No	NA	NA	NA	NA	NA	NA	NA	NA
s18v1_63255	3365	3	0	2	No	NA	NA	NA	NA	NA	NA	NA	NA
s18v1_63303	2590	3	0	0	No	NA	NA	NA	NA	NA	NA	NA	NA
s18v1_63393	2238	3	0	1	No	NA	NA	NA	NA	NA	NA	NA	NA
s18v1_63627	1279	2	0	0	No	NA	NA	NA	NA	NA	NA	NA	NA
s18v1_63862	1297	1	0	0	No	NA	NA	NA	NA	NA	NA	NA	NA
s18v1_63876	1204	1	0	0	No	NA	NA	NA	NA	NA	NA	NA	NA
s18v1_63943	1146	2	0	0	No	NA	NA	NA	NA	NA	NA	NA	NA
s18v1_63957	1080	2	0	1	No	NA	NA	NA	NA	NA	NA	NA	NA
s18v1_64084	1366	2	0	0	No	NA	NA	NA	NA	NA	NA	NA	NA
s18v1_64229	1224	1	0	1	No	NA	NA	NA	NA	NA	NA	NA	NA
s18v1_64369	1096	2	0	2	No	NA	NA	NA	NA	NA	NA	NA	NA
s18v1_64379	1567	2	2	0	No	NA	NA	NA	NA	NA	NA	NA	NA
s18v1_64438	1930	2	0	2	No	NA	NA	NA	NA	NA	NA	NA	NA
s18v1_64477	3096	3	0	1	No	NA	NA	NA	NA	NA	NA	NA	NA
s18v1_64508	1177	3	0	3	No	NA	NA	NA	NA	NA	NA	NA	NA
s18v1_64519	3673	3	0	1	No	NA	NA	NA	NA	NA	NA	NA	NA
s18v1_64561	1185	1	0	1	No	NA	NA	NA	NA	NA	NA	NA	NA
s18v1_64597	11729	14	0	1	No	NA	NA	NA	NA	NA	NA	NA	NA
s18v1_64764	14790	19	4	0	No	NA	NA	NA	NA	NA	NA	NA	NA
s18v1_64937	1951	2	0	1	No	NA	NA	NA	NA	NA	NA	NA	NA
s18v1_65108	3488	4	0	0	No	NA	NA	NA	NA	NA	NA	NA	NA
s18v1_65132	2677	3	0	2	No	NA	NA	NA	NA	NA	NA	NA	NA
s18v1_65157	1133	1	0	1	No	NA	NA	NA	NA	NA	NA	NA	NA
s18v1_65358	1455	2	0	1	No	NA	NA	NA	NA	NA	NA	NA	NA
s18v1_65379	1245	1	0	1	No	NA	NA	NA	NA	NA	NA	NA	NA
s18v1_65493	1192	2	0	1	No	NA	NA	NA	NA	NA	NA	NA	NA
s18v1_65562	1193	4	0	0	No	NA	NA	NA	NA	NA	NA	NA	NA
s18v1_65583	1178	1	0	1	No	NA	NA	NA	NA	NA	NA	NA	NA
s18v1_65661	1299	4	0	0	No	NA	NA	NA	NA	NA	NA	NA	NA
s18v1_65794	1285	1	0	0	No	NA	NA	NA	NA	NA	NA	NA	NA
s18v1_65833	1194	2	0	2	No	NA	NA	NA	NA	NA	NA	NA	NA
s18v1_65847	1163	1	0	0	No	NA	NA	NA	NA	NA	NA	NA	NA
s18v1_66013	4582	5	0	1	No	NA	NA	NA	NA	NA	NA	NA	NA
s18v1_66014	1327	2	0	1	No	NA	NA	NA	NA	NA	NA	NA	NA
s18v1_66253	3768	9	0	3	No	NA	NA	NA	NA	NA	NA	NA	NA
s18v1_66256	1126	2	0	2	No	NA	NA	NA	NA	NA	NA	NA	NA
s18v1_66266	3501	5	0	1	No	NA	NA	NA	NA	NA	NA	NA	NA
s18v1_66268	1162	1	0	1	No	NA	NA	NA	NA	NA	NA	NA	NA
s18v1_66374	1287	3	1	0	No	NA	NA	NA	NA	NA	NA	NA	NA
s18v1_66462	1881	3	0	2	No	NA	NA	NA	NA	NA	NA	NA	NA
s18v1_66514	1360	2	0	0	No	NA	NA	NA	NA	NA	NA	NA	NA
s18v1_66637	1073	2	0	2	No	NA	NA	NA	NA	NA	NA	NA	NA
s18v1_66655	1285	2	1	0	No	NA	NA	NA	NA	NA	NA	NA	NA
s18v1_66750	3753	3	0	3	No	NA	NA	NA	NA	NA	NA	NA	NA
s18v1_66860	1391	2	0	0	No	NA	NA	NA	NA	NA	NA	NA	NA
s18v1_66897	3331	3	0	1	No	NA	NA	NA	NA	NA	NA	NA	NA
s18v1_66968	1691	2	0	1	No	NA	NA	NA	NA	NA	NA	NA	NA
s18v1_66985	5260	7	0	6	No	NA	NA	NA	NA	NA	NA	NA	NA
s18v1_66990	3545	3	1	0	No	NA	NA	NA	NA	NA	NA	NA	NA
s18v1_67251	1133	2	0	0	No	NA	NA	NA	NA	NA	NA	NA	NA
s18v1_67344	2132	1	0	0	No	NA	NA	NA	NA	NA	NA	NA	NA
s18v1_67356	1016	2	0	0	No	NA	NA	NA	NA	NA	NA	NA	NA
s18v1_67451	16713	19	7	0	No	NA	NA	NA	NA	NA	NA	NA	NA
s18v1_67582	4150	8	0	0	No	NA	NA	NA	NA	NA	NA	NA	NA
s18v1_67798	2311	3	0	2	No	NA	NA	NA	NA	NA	NA	NA	NA
s18v1_67904	2125	1	0	0	No	NA	NA	NA	NA	NA	NA	NA	NA
s18v1_67996	2512	2	0	0	No	NA	NA	NA	NA	NA	NA	NA	NA
s18v1_68000	1381	2	0	1	No	NA	NA	NA	NA	NA	NA	NA	NA
s18v1_68009	1257	1	0	1	No	NA	NA	NA	NA	NA	NA	NA	NA
s18v1_68406	1146	2	2	0	No	NA	NA	NA	NA	NA	NA	NA	NA
s18v1_68485	1536	2	0	1	No	NA	NA	NA	NA	NA	NA	NA	NA
s18v1_68565	3011	5	0	3	No	NA	NA	NA	NA	NA	NA	NA	NA
s18v1_68621	1182	2	2	0	No	NA	NA	NA	NA	NA	NA	NA	NA
s18v1_68649	2803	1	0	1	No	NA	NA	NA	NA	NA	NA	NA	NA
s18v1_68835	1158	2	2	0	No	NA	NA	NA	NA	NA	NA	NA	NA
s18v1_68888	24969	44	5	0	No	NA	NA	NA	NA	NA	NA	NA	NA
s18v1_68942	1665	3	0	0	No	NA	NA	NA	NA	NA	NA	NA	NA
s18v1_69148	3383	5	0	3	No	NA	NA	NA	NA	NA	NA	NA	NA
s18v1_69356	1321	2	0	1	No	NA	NA	NA	NA	NA	NA	NA	NA
s18v1_69455	1095	2	0	1	No	NA	NA	NA	NA	NA	NA	NA	NA
s18v1_69520	3716	5	0	0	No	NA	NA	NA	NA	NA	NA	NA	NA
s18v1_69609	1559	2	0	1	No	NA	NA	NA	NA	NA	NA	NA	NA
s18v1_69744	2146	2	0	2	No	NA	NA	NA	NA	NA	NA	NA	NA
s18v1_69794	1284	1	0	1	No	NA	NA	NA	NA	NA	NA	NA	NA
s18v1_70619	2010	4	0	1	No	NA	NA	NA	NA	NA	NA	NA	NA
s18v1_70642	1107	3	0	1	No	NA	NA	NA	NA	NA	NA	NA	NA
s18v1_70771	4408	11	1	0	No	NA	NA	NA	NA	NA	NA	NA	NA
s18v1_70781	1096	1	0	0	No	NA	NA	NA	NA	NA	NA	NA	NA
s18v1_70832	1650	3	1	0	No	NA	NA	NA	NA	NA	NA	NA	NA
s18v1_70848	1041	2	0	1	No	NA	NA	NA	NA	NA	NA	NA	NA
s18v1_70883	3263	4	0	4	No	NA	NA	NA	NA	NA	NA	NA	NA
s18v1_70895	1106	1	0	1	No	NA	NA	NA	NA	NA	NA	NA	NA
s18v1_70997	1134	1	0	0	No	NA	NA	NA	NA	NA	NA	NA	NA
s18v1_71000	2000	1	0	1	No	NA	NA	NA	NA	NA	NA	NA	NA
s18v1_71296	82216	128	28	5	No	NA	NA	NA	NA	NA	NA	NA	NA
s18v1_71354	8099	8	0	6	No	NA	NA	NA	NA	NA	NA	NA	NA
s18v1_71623	1588	2	2	0	No	NA	NA	NA	NA	NA	NA	NA	NA
s18v1_71642	1394	2	0	2	No	NA	NA	NA	NA	NA	NA	NA	NA
s18v1_71787	1077	2	0	1	No	NA	NA	NA	NA	NA	NA	NA	NA
s18v1_71936	1143	3	0	0	No	NA	NA	NA	NA	NA	NA	NA	NA
s18v1_71957	46120	45	4	1	No	NA	NA	NA	NA	NA	NA	NA	NA
s18v1_72076	1292	1	0	1	No	NA	NA	NA	NA	NA	NA	NA	NA
s18v1_72328	1117	3	0	2	No	NA	NA	NA	NA	NA	NA	NA	NA
s18v1_72366	1033	2	0	2	No	NA	NA	NA	NA	NA	NA	NA	NA
s18v1_72379	2029	5	0	2	No	NA	NA	NA	NA	NA	NA	NA	NA
s18v1_72412	1362	1	0	0	No	NA	NA	NA	NA	NA	NA	NA	NA
s18v1_72458	2010	2	0	1	No	NA	NA	NA	NA	NA	NA	NA	NA
s18v1_72471	1025	2	0	1	No	NA	NA	NA	NA	NA	NA	NA	NA
s18v1_72492	2691	3	1	0	No	NA	NA	NA	NA	NA	NA	NA	NA
s18v1_72497	1197	1	0	0	No	NA	NA	NA	NA	NA	NA	NA	NA
s18v1_72514	1160	2	0	0	No	NA	NA	NA	NA	NA	NA	NA	NA
s18v1_72642	1062	1	0	0	No	NA	NA	NA	NA	NA	NA	NA	NA
s18v1_72707	1240	2	0	1	No	NA	NA	NA	NA	NA	NA	NA	NA
s18v1_72713	7232	18	0	17	No	NA	NA	NA	NA	NA	NA	NA	NA
s18v1_72772	1131	2	0	1	No	NA	NA	NA	NA	NA	NA	NA	NA
s18v1_72869	1258	4	0	2	No	NA	NA	NA	NA	NA	NA	NA	NA
s18v1_72944	1029	1	0	0	No	NA	NA	NA	NA	NA	NA	NA	NA
s18v1_73099	45919	72	16	1	No	NA	NA	NA	NA	NA	NA	NA	NA
s18v1_73150	1078	2	0	0	No	NA	NA	NA	NA	NA	NA	NA	NA
s18v1_73163	97817	117	14	3	No	NA	NA	NA	NA	NA	NA	NA	NA
s18v1_73164	39182	68	31	0	No	NA	NA	NA	NA	NA	NA	NA	NA
s18v1_73168	32967	52	16	1	No	NA	NA	NA	NA	NA	NA	NA	NA
s18v1_73172	63313	64	5	0	No	NA	NA	NA	NA	NA	NA	NA	NA
s18v1_73174	36966	53	23	1	No	NA	NA	NA	NA	NA	NA	NA	NA
s18v1_73176	81999	109	14	1	No	NA	NA	NA	NA	NA	NA	NA	NA
s18v1_73178	78898	107	14	1	No	NA	NA	NA	NA	NA	NA	NA	NA
s18v1_73179	47040	65	18	0	No	NA	NA	NA	NA	NA	NA	NA	NA
s18v1-PF_66	1454	2	0	1	No	NA	NA	NA	NA	NA	NA	NA	NA
s18v1-PF_190	1017	1	0	1	No	NA	NA	NA	NA	NA	NA	NA	NA
s18v1-PF_261	1778	2	0	2	No	NA	NA	NA	NA	NA	NA	NA	NA
s18v1-PF_301	1043	1	0	0	No	NA	NA	NA	NA	NA	NA	NA	NA
s18v1-PF_367	1572	2	0	2	No	NA	NA	NA	NA	NA	NA	NA	NA
s18v1-PF_422	1115	2	0	2	No	NA	NA	NA	NA	NA	NA	NA	NA
s18v1-PF_429	1378	1	0	0	No	NA	NA	NA	NA	NA	NA	NA	NA
s18v1-PF_591	3695	16	0	0	No	NA	NA	NA	NA	NA	NA	NA	NA
s18v1-PF_692	5261	8	1	0	No	NA	NA	NA	NA	NA	NA	NA	NA
s18v1-PF_825	1295	2	0	2	No	NA	NA	NA	NA	NA	NA	NA	NA
s18v1-PF_1021	1319	1	0	0	No	NA	NA	NA	NA	NA	NA	NA	NA
s18v1-PF_1070	1423	1	0	0	No	NA	NA	NA	NA	NA	NA	NA	NA
s18v1-PF_1212	1454	1	0	0	No	NA	NA	NA	NA	NA	NA	NA	NA
s18v1-PF_1223	1802	2	0	2	No	NA	NA	NA	NA	NA	NA	NA	NA
s18v1-PF_1261	1280	2	0	1	No	NA	NA	NA	NA	NA	NA	NA	NA
s18v1-PF_1432	5540	6	0	5	No	NA	NA	NA	NA	NA	NA	NA	NA
s18v1-PF_1472	1389	2	0	1	No	NA	NA	NA	NA	NA	NA	NA	NA
s18v1-PF_1569	2250	3	0	0	No	NA	NA	NA	NA	NA	NA	NA	NA
s18v1-PF_1630	1589	2	0	0	No	NA	NA	NA	NA	NA	NA	NA	NA
s18v1-PF_1687	18713	5	0	2	No	NA	NA	NA	NA	NA	NA	NA	NA
s18v1-PF_1736	1091	2	0	0	No	NA	NA	NA	NA	NA	NA	NA	NA
s18v1-PF_1791	28130	33	0	8	No	NA	NA	NA	NA	NA	NA	NA	NA
s18v1-PF_1843	1071	1	0	0	No	NA	NA	NA	NA	NA	NA	NA	NA
s18v1-PF_1845	1280	1	0	1	No	NA	NA	NA	NA	NA	NA	NA	NA
s18v1-PF_1861	1147	1	0	0	No	NA	NA	NA	NA	NA	NA	NA	NA
s18v1-PF_1908	2341	3	0	1	No	NA	NA	NA	NA	NA	NA	NA	NA
s18v1-PF_2095	1023	2	0	1	No	NA	NA	NA	NA	NA	NA	NA	NA
s18v1-PF_2229	1879	3	0	0	No	NA	NA	NA	NA	NA	NA	NA	NA
s18v1-PF_2298	3597	2	0	2	No	NA	NA	NA	NA	NA	NA	NA	NA
s18v1-PF_2299	1441	4	1	0	No	NA	NA	NA	NA	NA	NA	NA	NA
s18v1-PF_2354	44068	69	15	0	No	NA	NA	NA	NA	NA	NA	NA	NA
s18v1-PF_2427	1815	1	0	1	No	NA	NA	NA	NA	NA	NA	NA	NA
s18v1-PF_2527	1500	2	0	1	No	NA	NA	NA	NA	NA	NA	NA	NA
s18v1-PF_2591	2651	7	0	0	No	NA	NA	NA	NA	NA	NA	NA	NA
s18v1-PF_2666	1989	2	0	0	No	NA	NA	NA	NA	NA	NA	NA	NA
s18v1-PF_2709	1025	2	0	1	No	NA	NA	NA	NA	NA	NA	NA	NA
s18v1-PF_2765	1323	4	0	0	No	NA	NA	NA	NA	NA	NA	NA	NA
s18v1-PF_2772	1269	2	0	0	No	NA	NA	NA	NA	NA	NA	NA	NA
s18v1-PF_2864	2696	3	0	1	No	NA	NA	NA	NA	NA	NA	NA	NA
s18v1-PF_2937	1002	1	0	1	No	NA	NA	NA	NA	NA	NA	NA	NA
s18v1-PF_2942	1120	1	0	1	No	NA	NA	NA	NA	NA	NA	NA	NA
s18v1-PF_2955	1652	3	0	1	No	NA	NA	NA	NA	NA	NA	NA	NA
s18v1-PF_2991	1093	1	1	0	No	NA	NA	NA	NA	NA	NA	NA	NA
s18v1-PF_3034	1482	2	0	0	No	NA	NA	NA	NA	NA	NA	NA	NA
s18v1-PF_3193	1013	2	0	2	No	NA	NA	NA	NA	NA	NA	NA	NA
s18v1-PF_3224	1029	1	0	1	No	NA	NA	NA	NA	NA	NA	NA	NA
s18v1-PF_3225	1394	1	0	1	No	NA	NA	NA	NA	NA	NA	NA	NA
s18v1-PF_3385	1242	2	0	1	No	NA	NA	NA	NA	NA	NA	NA	NA
s18v1-PF_3668	1327	3	0	0	No	NA	NA	NA	NA	NA	NA	NA	NA
s18v1-PF_3728	1118	2	0	1	No	NA	NA	NA	NA	NA	NA	NA	NA
s18v1-PF_3746	1113	3	0	0	No	NA	NA	NA	NA	NA	NA	NA	NA
s18v1-PF_3878	22499	30	13	0	No	NA	NA	NA	NA	NA	NA	NA	NA
s18v1-PF_3964	21382	34	0	33	No	NA	NA	NA	NA	NA	NA	NA	NA
s18v1-PF_3985	1315	1	0	1	No	NA	NA	NA	NA	NA	NA	NA	NA
s18v1-PF_3996	2249	2	0	1	No	NA	NA	NA	NA	NA	NA	NA	NA
s18v1-PF_4005	1025	2	0	2	No	NA	NA	NA	NA	NA	NA	NA	NA
s18v1-PF_4011	1357	1	0	1	No	NA	NA	NA	NA	NA	NA	NA	NA
s18v1-PF_4075	1159	1	0	1	No	NA	NA	NA	NA	NA	NA	NA	NA
s18v1-PF_4465	1160	4	0	2	No	NA	NA	NA	NA	NA	NA	NA	NA
s18v1-PF_4598	1837	1	0	1	No	NA	NA	NA	NA	NA	NA	NA	NA
s18v1-PF_4637	1061	2	0	2	No	NA	NA	NA	NA	NA	NA	NA	NA
s18v1-PF_4688	2267	3	0	2	No	NA	NA	NA	NA	NA	NA	NA	NA
s18v1-PF_4696	3675	2	0	1	No	NA	NA	NA	NA	NA	NA	NA	NA
s18v1-PF_4753	1827	2	0	0	No	NA	NA	NA	NA	NA	NA	NA	NA
s18v1-PF_4764	1341	2	0	0	No	NA	NA	NA	NA	NA	NA	NA	NA
s18v1-PF_4784	7907	9	1	0	No	NA	NA	NA	NA	NA	NA	NA	NA
s18v1-PF_5055	1091	1	0	0	No	NA	NA	NA	NA	NA	NA	NA	NA
s18v1-PF_5082	9832	6	0	4	No	NA	NA	NA	NA	NA	NA	NA	NA
s18v1-PF_5091	1168	4	0	0	No	NA	NA	NA	NA	NA	NA	NA	NA
s18v1-PF_5154	1004	2	0	1	No	NA	NA	NA	NA	NA	NA	NA	NA
s18v1-PF_5333	3584	6	0	5	No	NA	NA	NA	NA	NA	NA	NA	NA
s18v1-PF_5394	5538	5	0	1	No	NA	NA	NA	NA	NA	NA	NA	NA
s18v1-PF_5425	1703	2	0	2	No	NA	NA	NA	NA	NA	NA	NA	NA
s18v1-PF_5438	1220	1	0	1	No	NA	NA	NA	NA	NA	NA	NA	NA
s18v1-PF_5712	1480	2	0	1	No	NA	NA	NA	NA	NA	NA	NA	NA
s18v1-PF_5755	1031	3	0	2	No	NA	NA	NA	NA	NA	NA	NA	NA
s18v1-PF_5769	1163	1	0	0	No	NA	NA	NA	NA	NA	NA	NA	NA
s18v1-PF_5779	2237	2	0	1	No	NA	NA	NA	NA	NA	NA	NA	NA
s18v1-PF_5815	3107	5	0	2	No	NA	NA	NA	NA	NA	NA	NA	NA
s18v1-PF_6052	1017	1	0	1	No	NA	NA	NA	NA	NA	NA	NA	NA
s18v1-PF_6058	15418	18	18	0	No	NA	NA	NA	NA	NA	NA	NA	NA
s18v1-PF_6343	1696	1	0	1	No	NA	NA	NA	NA	NA	NA	NA	NA
s18v1-PF_6406	1576	2	0	0	No	NA	NA	NA	NA	NA	NA	NA	NA
s18v1-PF_6458	6651	11	3	0	No	NA	NA	NA	NA	NA	NA	NA	NA
s18v1-PF_6590	52966	83	23	1	No	NA	NA	NA	NA	NA	NA	NA	NA
s18v1-PF_6635	2598	3	0	2	No	NA	NA	NA	NA	NA	NA	NA	NA
s18v1-PF_6707	135400	177	37	5	No	NA	NA	NA	NA	NA	NA	NA	NA
s18v1-PF_6732	1067	2	0	1	No	NA	NA	NA	NA	NA	NA	NA	NA
s18v1-PF_6781	7843	10	1	0	No	NA	NA	NA	NA	NA	NA	NA	NA
s18v1-PF_6925	1034	2	0	2	No	NA	NA	NA	NA	NA	NA	NA	NA
s18v1-PF_6950	2191	3	0	2	No	NA	NA	NA	NA	NA	NA	NA	NA
s18v1-PF_6993	1818	1	0	1	No	NA	NA	NA	NA	NA	NA	NA	NA
s18v1-PF_7035	1239	2	0	2	No	NA	NA	NA	NA	NA	NA	NA	NA
s18v1-PF_7114	1612	2	0	2	No	NA	NA	NA	NA	NA	NA	NA	NA
s18v1-PF_7277	3321	4	0	4	No	NA	NA	NA	NA	NA	NA	NA	NA
s18v1-PF_7386	1180	2	0	1	No	NA	NA	NA	NA	NA	NA	NA	NA
s18v1-PF_7447	1077	1	0	1	No	NA	NA	NA	NA	NA	NA	NA	NA
s18v1-PF_7510	1076	2	0	1	No	NA	NA	NA	NA	NA	NA	NA	NA
s18v1-PF_7515	1458	1	0	1	No	NA	NA	NA	NA	NA	NA	NA	NA
s18v1-PF_7525	1446	1	0	1	No	NA	NA	NA	NA	NA	NA	NA	NA
s18v1-PF_7713	1084	1	0	1	No	NA	NA	NA	NA	NA	NA	NA	NA
s18v1-PF_7941	3474	6	0	5	No	NA	NA	NA	NA	NA	NA	NA	NA
s18v1-PF_8038	1285	2	0	0	No	NA	NA	NA	NA	NA	NA	NA	NA
s18v1-PF_8064	1048	3	0	0	No	NA	NA	NA	NA	NA	NA	NA	NA
s18v1-PF_8122	1477	2	0	2	No	NA	NA	NA	NA	NA	NA	NA	NA
s18v1-PF_8128	1721	5	0	0	No	NA	NA	NA	NA	NA	NA	NA	NA
s18v1-PF_8182	1566	3	0	2	No	NA	NA	NA	NA	NA	NA	NA	NA
s18v1-PF_8330	1201	1	0	1	No	NA	NA	NA	NA	NA	NA	NA	NA
s18v1-PF_8360	1045	1	0	1	No	NA	NA	NA	NA	NA	NA	NA	NA
s18v1-PF_8416	3825	2	0	0	No	NA	NA	NA	NA	NA	NA	NA	NA
s18v1-PF_8505	1192	2	0	0	No	NA	NA	NA	NA	NA	NA	NA	NA
s18v1-PF_8507	1161	2	0	1	No	NA	NA	NA	NA	NA	NA	NA	NA
s18v1-PF_8774	1127	1	0	0	No	NA	NA	NA	NA	NA	NA	NA	NA
s18v1-PF_8845	1500	2	0	1	No	NA	NA	NA	NA	NA	NA	NA	NA
s18v1-PF_8963	1113	2	0	1	No	NA	NA	NA	NA	NA	NA	NA	NA
s18v1-PF_9036	1092	2	0	1	No	NA	NA	NA	NA	NA	NA	NA	NA
s18v1-PF_9114	1529	1	0	1	No	NA	NA	NA	NA	NA	NA	NA	NA
s18v1-PF_9115	1192	1	0	1	No	NA	NA	NA	NA	NA	NA	NA	NA
s18v1-PF_9169	6210	9	3	0	No	NA	NA	NA	NA	NA	NA	NA	NA
s18v1-PF_9278	1165	3	0	1	No	NA	NA	NA	NA	NA	NA	NA	NA
s18v1-PF_9357	3457	3	0	3	No	NA	NA	NA	NA	NA	NA	NA	NA
s18v1-PF_9358	1551	1	0	0	No	NA	NA	NA	NA	NA	NA	NA	NA
s18v1-PF_9409	1172	1	0	1	No	NA	NA	NA	NA	NA	NA	NA	NA
s18v1-PF_9796	2322	1	0	1	No	NA	NA	NA	NA	NA	NA	NA	NA
s18v1-PF_9945	3055	3	0	3	No	NA	NA	NA	NA	NA	NA	NA	NA
s18v1-PF_9999	1159	1	0	1	No	NA	NA	NA	NA	NA	NA	NA	NA
s18v1-PF_10051	1146	1	0	1	No	NA	NA	NA	NA	NA	NA	NA	NA
s18v1-PF_10067	82025	129	28	5	No	NA	NA	NA	NA	NA	NA	NA	NA
s18v1-PF_10103	1145	2	0	1	No	NA	NA	NA	NA	NA	NA	NA	NA
s18v1-PF_10155	1860	2	0	0	No	NA	NA	NA	NA	NA	NA	NA	NA
s18v1-PF_10271	1176	1	0	0	No	NA	NA	NA	NA	NA	NA	NA	NA
s18v1-PF_10284	1014	2	0	2	No	NA	NA	NA	NA	NA	NA	NA	NA
s18v1-PF_10287	1707	2	0	2	No	NA	NA	NA	NA	NA	NA	NA	NA
s18v1-PF_10373	2403	1	0	0	No	NA	NA	NA	NA	NA	NA	NA	NA
s18v1-PF_10379	1160	1	0	1	No	NA	NA	NA	NA	NA	NA	NA	NA
s18v1-PF_10535	14088	27	0	0	No	NA	NA	NA	NA	NA	NA	NA	NA
s18v1-PF_10559	1800	2	0	1	No	NA	NA	NA	NA	NA	NA	NA	NA
s18v1-PF_10652	1388	2	0	1	No	NA	NA	NA	NA	NA	NA	NA	NA
s18v1-PF_10778	1506	2	0	1	No	NA	NA	NA	NA	NA	NA	NA	NA
s18v1-PF_10850	1110	1	0	1	No	NA	NA	NA	NA	NA	NA	NA	NA
s18v1-PF_10967	1299	2	0	1	No	NA	NA	NA	NA	NA	NA	NA	NA
s18v1-PF_10976	3896	5	0	3	No	NA	NA	NA	NA	NA	NA	NA	NA
s18v1-PF_10983	1012	1	0	0	No	NA	NA	NA	NA	NA	NA	NA	NA
s18v1-PF_11090	1480	3	0	2	No	NA	NA	NA	NA	NA	NA	NA	NA
s18v1-PF_11092	7627	8	1	2	Yes	2757	4870	viral,host	27574870	1-2757,2758-7627	1-4,5-8	1,0	0,2
s18v1-PF_11096	1749	2	0	1	No	NA	NA	NA	NA	NA	NA	NA	NA
s18v1-PF_11155	1274	2	0	1	No	NA	NA	NA	NA	NA	NA	NA	NA
s18v1-PF_11178	1409	2	0	1	No	NA	NA	NA	NA	NA	NA	NA	NA
s18v1-PF_11264	1092	1	0	0	No	NA	NA	NA	NA	NA	NA	NA	NA
s18v1-PF_11364	1099	3	0	1	No	NA	NA	NA	NA	NA	NA	NA	NA
s18v1-PF_11367	1931	4	0	1	No	NA	NA	NA	NA	NA	NA	NA	NA
s18v1-PF_11588	1862	2	0	1	No	NA	NA	NA	NA	NA	NA	NA	NA
s18v1-PF_11647	3663	5	0	2	No	NA	NA	NA	NA	NA	NA	NA	NA
s18v1-PF_11701	1049	3	0	1	No	NA	NA	NA	NA	NA	NA	NA	NA
s18v1-PF_11707	21632	21	0	4	No	NA	NA	NA	NA	NA	NA	NA	NA
s18v1-PF_11733	4090	12	2	0	No	NA	NA	NA	NA	NA	NA	NA	NA
s18v1-PF_11758	5296	8	1	0	No	NA	NA	NA	NA	NA	NA	NA	NA
s18v1-PF_11785	34770	58	16	0	No	NA	NA	NA	NA	NA	NA	NA	NA
s18v1-PF_11865	1478	1	0	0	No	NA	NA	NA	NA	NA	NA	NA	NA
s18v1-PF_11871	1064	2	0	2	No	NA	NA	NA	NA	NA	NA	NA	NA
s18v1-PF_11941	1660	1	0	0	No	NA	NA	NA	NA	NA	NA	NA	NA
s18v1-PF_11989	1031	1	0	1	No	NA	NA	NA	NA	NA	NA	NA	NA
s18v1-PF_12024	1223	2	1	0	No	NA	NA	NA	NA	NA	NA	NA	NA
s18v1-PF_12147	1955	1	0	1	No	NA	NA	NA	NA	NA	NA	NA	NA
s18v1-PF_12271	1131	1	0	1	No	NA	NA	NA	NA	NA	NA	NA	NA
s18v1-PF_12324	1311	2	0	1	No	NA	NA	NA	NA	NA	NA	NA	NA
s18v1-PF_12351	1560	2	0	1	No	NA	NA	NA	NA	NA	NA	NA	NA
s18v1-PF_12405	1228	2	0	0	No	NA	NA	NA	NA	NA	NA	NA	NA
s18v1-PF_12446	1370	1	0	1	No	NA	NA	NA	NA	NA	NA	NA	NA
s18v1-PF_12678	3201	4	0	2	No	NA	NA	NA	NA	NA	NA	NA	NA
s18v1-PF_12764	1299	2	0	0	No	NA	NA	NA	NA	NA	NA	NA	NA
s18v1-PF_12934	36625	45	11	1	No	NA	NA	NA	NA	NA	NA	NA	NA
s18v1-PF_12959	1116	1	0	1	No	NA	NA	NA	NA	NA	NA	NA	NA
s18v1-PF_13172	5838	4	0	4	No	NA	NA	NA	NA	NA	NA	NA	NA
s18v1-PF_13258	1148	2	0	0	No	NA	NA	NA	NA	NA	NA	NA	NA
s18v1-PF_13295	1425	3	1	0	No	NA	NA	NA	NA	NA	NA	NA	NA
s18v1-PF_13340	5444	4	0	3	No	NA	NA	NA	NA	NA	NA	NA	NA
s18v1-PF_13362	1395	4	0	3	No	NA	NA	NA	NA	NA	NA	NA	NA
s18v1-PF_13424	1177	1	0	0	No	NA	NA	NA	NA	NA	NA	NA	NA
s18v1-PF_13512	1066	1	0	0	No	NA	NA	NA	NA	NA	NA	NA	NA
s18v1-PF_13554	1658	1	0	1	No	NA	NA	NA	NA	NA	NA	NA	NA
s18v1-PF_13647	2067	2	0	1	No	NA	NA	NA	NA	NA	NA	NA	NA
s18v1-PF_13686	3413	2	0	1	No	NA	NA	NA	NA	NA	NA	NA	NA
s18v1-PF_13704	1686	2	0	2	No	NA	NA	NA	NA	NA	NA	NA	NA
s18v1-PF_13727	1574	3	0	0	No	NA	NA	NA	NA	NA	NA	NA	NA
s18v1-PF_13959	1963	4	0	2	No	NA	NA	NA	NA	NA	NA	NA	NA
s18v1-PF_14204	1130	2	0	0	No	NA	NA	NA	NA	NA	NA	NA	NA
s18v1-PF_14214	5307	5	0	4	No	NA	NA	NA	NA	NA	NA	NA	NA
s18v1-PF_14996	2169	3	0	0	No	NA	NA	NA	NA	NA	NA	NA	NA
s18v1-PF_15141	1544	2	0	2	No	NA	NA	NA	NA	NA	NA	NA	NA
s18v1-PF_15303	1057	1	0	1	No	NA	NA	NA	NA	NA	NA	NA	NA
s18v1-PF_15332	1428	1	0	1	No	NA	NA	NA	NA	NA	NA	NA	NA
s18v1-PF_15377	1157	1	0	1	No	NA	NA	NA	NA	NA	NA	NA	NA
s18v1-PF_15611	1243	2	1	0	No	NA	NA	NA	NA	NA	NA	NA	NA
s18v1-PF_15620	1382	2	0	1	No	NA	NA	NA	NA	NA	NA	NA	NA
s18v1-PF_15625	1005	1	0	0	No	NA	NA	NA	NA	NA	NA	NA	NA
s18v1-PF_15669	12476	16	0	3	No	NA	NA	NA	NA	NA	NA	NA	NA
s18v1-PF_15777	1111	1	0	0	No	NA	NA	NA	NA	NA	NA	NA	NA
s18v1-PF_15909	1343	2	0	1	No	NA	NA	NA	NA	NA	NA	NA	NA
s18v1-PF_15947	1112	1	0	0	No	NA	NA	NA	NA	NA	NA	NA	NA
s18v1-PF_16043	1633	3	0	1	No	NA	NA	NA	NA	NA	NA	NA	NA
s18v1-PF_16120	1519	1	0	1	No	NA	NA	NA	NA	NA	NA	NA	NA
s18v1-PF_16257	5184	10	2	0	No	NA	NA	NA	NA	NA	NA	NA	NA
s18v1-PF_16350	1212	1	0	1	No	NA	NA	NA	NA	NA	NA	NA	NA
s18v1-PF_16375	1406	1	0	1	No	NA	NA	NA	NA	NA	NA	NA	NA
s18v1-PF_16412	1614	1	0	0	No	NA	NA	NA	NA	NA	NA	NA	NA
s18v1-PF_16620	1193	1	0	0	No	NA	NA	NA	NA	NA	NA	NA	NA
s18v1-PF_16720	1208	3	0	1	No	NA	NA	NA	NA	NA	NA	NA	NA
s18v1-PF_16911	1035	1	0	1	No	NA	NA	NA	NA	NA	NA	NA	NA
s18v1-PF_17064	3050	3	0	2	No	NA	NA	NA	NA	NA	NA	NA	NA
s18v1-PF_17075	1841	2	0	0	No	NA	NA	NA	NA	NA	NA	NA	NA
s18v1-PF_17233	4259	3	0	3	No	NA	NA	NA	NA	NA	NA	NA	NA
s18v1-PF_17318	1427	3	0	3	No	NA	NA	NA	NA	NA	NA	NA	NA
s18v1-PF_17411	1019	1	0	1	No	NA	NA	NA	NA	NA	NA	NA	NA
s18v1-PF_17802	50650	44	10	4	Yes	43848	6802	host,viral	680243848	1-6802,6803-50650	1-4,5-44	0,10	3,1
s18v1-PF_17894	1712	1	0	0	No	NA	NA	NA	NA	NA	NA	NA	NA
s18v1-PF_17987	1073	1	0	0	No	NA	NA	NA	NA	NA	NA	NA	NA
s18v1-PF_18066	1069	1	0	1	No	NA	NA	NA	NA	NA	NA	NA	NA
s18v1-PF_18240	1048	2	0	0	No	NA	NA	NA	NA	NA	NA	NA	NA
s18v1-PF_18326	1065	1	0	1	No	NA	NA	NA	NA	NA	NA	NA	NA
s18v1-PF_18478	1775	4	1	0	No	NA	NA	NA	NA	NA	NA	NA	NA
s18v1-PF_18522	4587	3	0	2	No	NA	NA	NA	NA	NA	NA	NA	NA
s18v1-PF_18529	1630	3	0	2	No	NA	NA	NA	NA	NA	NA	NA	NA
s18v1-PF_18568	2086	2	0	1	No	NA	NA	NA	NA	NA	NA	NA	NA
s18v1-PF_18595	5734	7	0	3	No	NA	NA	NA	NA	NA	NA	NA	NA
s18v1-PF_18737	1654	2	0	1	No	NA	NA	NA	NA	NA	NA	NA	NA
s18v1-PF_18750	1089	4	0	0	No	NA	NA	NA	NA	NA	NA	NA	NA
s18v1-PF_18769	1387	2	0	2	No	NA	NA	NA	NA	NA	NA	NA	NA
s18v1-PF_18826	1043	3	0	0	No	NA	NA	NA	NA	NA	NA	NA	NA
s18v1-PF_18832	1382	2	0	1	No	NA	NA	NA	NA	NA	NA	NA	NA
s18v1-PF_18867	2148	3	0	1	No	NA	NA	NA	NA	NA	NA	NA	NA
s18v1-PF_18988	1457	2	0	1	No	NA	NA	NA	NA	NA	NA	NA	NA
s18v1-PF_18993	1116	2	1	0	No	NA	NA	NA	NA	NA	NA	NA	NA
s18v1-PF_19008	3733	6	0	1	No	NA	NA	NA	NA	NA	NA	NA	NA
s18v1-PF_19019	3709	4	0	4	No	NA	NA	NA	NA	NA	NA	NA	NA
s18v1-PF_19070	1278	1	0	1	No	NA	NA	NA	NA	NA	NA	NA	NA
s18v1-PF_19165	1683	2	0	2	No	NA	NA	NA	NA	NA	NA	NA	NA
s18v1-PF_19206	1765	2	0	1	No	NA	NA	NA	NA	NA	NA	NA	NA
s18v1-PF_19341	1548	1	0	0	No	NA	NA	NA	NA	NA	NA	NA	NA
s18v1-PF_19478	1448	1	0	0	No	NA	NA	NA	NA	NA	NA	NA	NA
s18v1-PF_19618	1253	2	0	2	No	NA	NA	NA	NA	NA	NA	NA	NA
s18v1-PF_19628	1177	1	0	0	No	NA	NA	NA	NA	NA	NA	NA	NA
s18v1-PF_19725	1130	1	0	0	No	NA	NA	NA	NA	NA	NA	NA	NA
s18v1-PF_19814	1716	3	0	2	No	NA	NA	NA	NA	NA	NA	NA	NA
s18v1-PF_19834	1181	2	0	2	No	NA	NA	NA	NA	NA	NA	NA	NA
s18v1-PF_19850	1177	1	0	1	No	NA	NA	NA	NA	NA	NA	NA	NA
s18v1-PF_19860	2383	3	0	1	No	NA	NA	NA	NA	NA	NA	NA	NA
s18v1-PF_20012	1015	1	1	0	No	NA	NA	NA	NA	NA	NA	NA	NA
s18v1-PF_20026	1895	3	0	1	No	NA	NA	NA	NA	NA	NA	NA	NA
s18v1-PF_20075	3114	4	0	2	No	NA	NA	NA	NA	NA	NA	NA	NA
s18v1-PF_20116	1068	1	0	0	No	NA	NA	NA	NA	NA	NA	NA	NA
s18v1-PF_20166	1062	2	0	2	No	NA	NA	NA	NA	NA	NA	NA	NA
s18v1-PF_20422	1054	1	0	1	No	NA	NA	NA	NA	NA	NA	NA	NA
s18v1-PF_20450	2061	1	0	0	No	NA	NA	NA	NA	NA	NA	NA	NA
s18v1-PF_20459	10350	28	2	0	No	NA	NA	NA	NA	NA	NA	NA	NA
s18v1-PF_20762	1003	1	0	1	No	NA	NA	NA	NA	NA	NA	NA	NA
s18v1-PF_20835	1042	1	0	1	No	NA	NA	NA	NA	NA	NA	NA	NA
s18v1-PF_21087	1312	2	0	2	No	NA	NA	NA	NA	NA	NA	NA	NA
s18v1-PF_21117	3257	3	0	2	No	NA	NA	NA	NA	NA	NA	NA	NA
s18v1-PF_21202	1202	2	0	1	No	NA	NA	NA	NA	NA	NA	NA	NA
s18v1-PF_21206	1484	1	0	0	No	NA	NA	NA	NA	NA	NA	NA	NA
s18v1-PF_21298	1127	1	0	0	No	NA	NA	NA	NA	NA	NA	NA	NA
s18v1-PF_21478	1007	1	1	0	No	NA	NA	NA	NA	NA	NA	NA	NA
s18v1-PF_21659	1213	2	0	1	No	NA	NA	NA	NA	NA	NA	NA	NA
s18v1-PF_21679	1093	1	0	0	No	NA	NA	NA	NA	NA	NA	NA	NA
s18v1-PF_21690	1063	1	0	0	No	NA	NA	NA	NA	NA	NA	NA	NA
s18v1-PF_21809	1457	1	0	1	No	NA	NA	NA	NA	NA	NA	NA	NA
s18v1-PF_21833	8662	8	3	0	No	NA	NA	NA	NA	NA	NA	NA	NA
s18v1-PF_21838	1314	2	0	2	No	NA	NA	NA	NA	NA	NA	NA	NA
s18v1-PF_21842	3471	3	0	3	No	NA	NA	NA	NA	NA	NA	NA	NA
s18v1-PF_21922	1296	2	0	1	No	NA	NA	NA	NA	NA	NA	NA	NA
s18v1-PF_21981	1448	2	0	2	No	NA	NA	NA	NA	NA	NA	NA	NA
s18v1-PF_21989	1099	2	0	0	No	NA	NA	NA	NA	NA	NA	NA	NA
s18v1-PF_22104	1007	1	0	1	No	NA	NA	NA	NA	NA	NA	NA	NA
s18v1-PF_22117	1128	2	0	0	No	NA	NA	NA	NA	NA	NA	NA	NA
s18v1-PF_22135	2633	1	0	0	No	NA	NA	NA	NA	NA	NA	NA	NA
s18v1-PF_22195	1372	3	0	0	No	NA	NA	NA	NA	NA	NA	NA	NA
s18v1-PF_22211	1006	1	1	0	No	NA	NA	NA	NA	NA	NA	NA	NA
s18v1-PF_22216	1233	1	0	1	No	NA	NA	NA	NA	NA	NA	NA	NA
s18v1-PF_22217	1124	3	1	0	No	NA	NA	NA	NA	NA	NA	NA	NA
s18v1-PF_22327	3314	9	0	0	No	NA	NA	NA	NA	NA	NA	NA	NA
s18v1-PF_22678	1202	1	1	0	No	NA	NA	NA	NA	NA	NA	NA	NA
s18v1-PF_22820	3484	4	2	0	No	NA	NA	NA	NA	NA	NA	NA	NA
s18v1-PF_22984	2610	3	0	2	No	NA	NA	NA	NA	NA	NA	NA	NA
s18v1-PF_22993	1662	3	0	1	No	NA	NA	NA	NA	NA	NA	NA	NA
s18v1-PF_23244	1514	3	0	3	No	NA	NA	NA	NA	NA	NA	NA	NA
s18v1-PF_23510	1084	3	1	0	No	NA	NA	NA	NA	NA	NA	NA	NA
s18v1-PF_23517	1813	3	0	0	No	NA	NA	NA	NA	NA	NA	NA	NA
s18v1-PF_23660	4498	8	0	0	No	NA	NA	NA	NA	NA	NA	NA	NA
s18v1-PF_23676	2650	2	0	0	No	NA	NA	NA	NA	NA	NA	NA	NA
s18v1-PF_23741	4005	3	0	2	No	NA	NA	NA	NA	NA	NA	NA	NA
s18v1-PF_23797	1529	1	0	0	No	NA	NA	NA	NA	NA	NA	NA	NA
s18v1-PF_23888	4411	4	0	2	No	NA	NA	NA	NA	NA	NA	NA	NA
s18v1-PF_23943	2113	3	0	1	No	NA	NA	NA	NA	NA	NA	NA	NA
s18v1-PF_23962	1049	2	0	0	No	NA	NA	NA	NA	NA	NA	NA	NA
s18v1-PF_23991	1015	2	0	0	No	NA	NA	NA	NA	NA	NA	NA	NA
s18v1-PF_24057	2112	1	0	1	No	NA	NA	NA	NA	NA	NA	NA	NA
s18v1-PF_24074	1568	1	0	1	No	NA	NA	NA	NA	NA	NA	NA	NA
s18v1-PF_24089	5336	5	0	1	No	NA	NA	NA	NA	NA	NA	NA	NA
s18v1-PF_24255	1383	2	0	0	No	NA	NA	NA	NA	NA	NA	NA	NA
s18v1-PF_24264	1992	2	0	0	No	NA	NA	NA	NA	NA	NA	NA	NA
s18v1-PF_24281	1018	2	0	0	No	NA	NA	NA	NA	NA	NA	NA	NA
s18v1-PF_24324	1027	2	0	0	No	NA	NA	NA	NA	NA	NA	NA	NA
s18v1-PF_24344	5932	4	0	3	No	NA	NA	NA	NA	NA	NA	NA	NA
s18v1-PF_24377	1103	3	0	1	No	NA	NA	NA	NA	NA	NA	NA	NA
s18v1-PF_24490	1366	3	0	1	No	NA	NA	NA	NA	NA	NA	NA	NA
s18v1-PF_24551	1552	2	0	1	No	NA	NA	NA	NA	NA	NA	NA	NA
s18v1-PF_24588	92048	83	10	0	No	NA	NA	NA	NA	NA	NA	NA	NA
s18v1-PF_24767	1619	2	0	0	No	NA	NA	NA	NA	NA	NA	NA	NA
s18v1-PF_24833	2410	3	0	1	No	NA	NA	NA	NA	NA	NA	NA	NA
s18v1-PF_24934	5507	8	6	0	No	NA	NA	NA	NA	NA	NA	NA	NA
s18v1-PF_25104	6584	9	0	7	No	NA	NA	NA	NA	NA	NA	NA	NA
s18v1-PF_25162	1681	1	0	0	No	NA	NA	NA	NA	NA	NA	NA	NA
s18v1-PF_25362	2592	3	1	0	No	NA	NA	NA	NA	NA	NA	NA	NA
s18v1-PF_25422	1188	2	1	0	No	NA	NA	NA	NA	NA	NA	NA	NA
s18v1-PF_25454	5004	7	3	0	No	NA	NA	NA	NA	NA	NA	NA	NA
s18v1-PF_25463	10959	6	0	5	No	NA	NA	NA	NA	NA	NA	NA	NA
s18v1-PF_25493	1105	2	0	1	No	NA	NA	NA	NA	NA	NA	NA	NA
s18v1-PF_25536	3041	5	0	1	No	NA	NA	NA	NA	NA	NA	NA	NA
s18v1-PF_25570	1296	2	0	1	No	NA	NA	NA	NA	NA	NA	NA	NA
s18v1-PF_25664	3894	2	0	1	No	NA	NA	NA	NA	NA	NA	NA	NA
s18v1-PF_25717	1956	3	0	1	No	NA	NA	NA	NA	NA	NA	NA	NA
s18v1-PF_25912	1779	2	0	1	No	NA	NA	NA	NA	NA	NA	NA	NA
s18v1-PF_26084	1079	2	0	1	No	NA	NA	NA	NA	NA	NA	NA	NA
s18v1-PF_26174	3741	5	0	2	No	NA	NA	NA	NA	NA	NA	NA	NA
s18v1-PF_26205	1713	1	0	1	No	NA	NA	NA	NA	NA	NA	NA	NA
s18v1-PF_26258	178706	230	37	14	No	NA	NA	NA	NA	NA	NA	NA	NA
s18v1-PF_26410	5412	2	0	1	No	NA	NA	NA	NA	NA	NA	NA	NA
s18v1-PF_26670	1160	1	0	0	No	NA	NA	NA	NA	NA	NA	NA	NA
s18v1-PF_26681	3600	3	0	2	No	NA	NA	NA	NA	NA	NA	NA	NA
s18v1-PF_26834	1082	2	0	0	No	NA	NA	NA	NA	NA	NA	NA	NA
s18v1-PF_26964	5445	5	0	2	No	NA	NA	NA	NA	NA	NA	NA	NA
s18v1-PF_27003	3656	5	0	2	No	NA	NA	NA	NA	NA	NA	NA	NA
s18v1-PF_27052	3780	3	0	1	No	NA	NA	NA	NA	NA	NA	NA	NA
s18v1-PF_27367	1055	1	0	0	No	NA	NA	NA	NA	NA	NA	NA	NA
s18v1-PF_27440	5267	11	0	0	No	NA	NA	NA	NA	NA	NA	NA	NA
s18v1-PF_27608	2100	1	0	0	No	NA	NA	NA	NA	NA	NA	NA	NA
s18v1-PF_27614	1157	1	0	1	No	NA	NA	NA	NA	NA	NA	NA	NA
s18v1-PF_27619	1799	2	0	2	No	NA	NA	NA	NA	NA	NA	NA	NA
s18v1-PF_27651	1229	1	0	1	No	NA	NA	NA	NA	NA	NA	NA	NA
s18v1-PF_27655	1037	1	0	1	No	NA	NA	NA	NA	NA	NA	NA	NA
s18v1-PF_27662	1055	1	0	1	No	NA	NA	NA	NA	NA	NA	NA	NA
s18v1-PF_27836	1234	1	0	0	No	NA	NA	NA	NA	NA	NA	NA	NA
s18v1-PF_27867	3299	4	0	2	No	NA	NA	NA	NA	NA	NA	NA	NA
s18v1-PF_27873	24028	36	3	0	No	NA	NA	NA	NA	NA	NA	NA	NA
s18v1-PF_27966	1599	1	0	1	No	NA	NA	NA	NA	NA	NA	NA	NA
s18v1-PF_28060	1502	1	0	1	No	NA	NA	NA	NA	NA	NA	NA	NA
s18v1-PF_28185	1271	1	0	0	No	NA	NA	NA	NA	NA	NA	NA	NA
s18v1-PF_28438	5198	15	2	0	No	NA	NA	NA	NA	NA	NA	NA	NA
s18v1-PF_28475	1202	1	0	1	No	NA	NA	NA	NA	NA	NA	NA	NA
s18v1-PF_28516	1258	2	0	1	No	NA	NA	NA	NA	NA	NA	NA	NA
s18v1-PF_28574	1561	2	0	0	No	NA	NA	NA	NA	NA	NA	NA	NA
s18v1-PF_28637	1021	1	0	1	No	NA	NA	NA	NA	NA	NA	NA	NA
s18v1-PF_28760	1181	1	0	0	No	NA	NA	NA	NA	NA	NA	NA	NA
s18v1-PF_28774	1116	1	0	1	No	NA	NA	NA	NA	NA	NA	NA	NA
s18v1-PF_28858	1586	3	0	2	No	NA	NA	NA	NA	NA	NA	NA	NA
s18v1-PF_28991	1094	2	0	1	No	NA	NA	NA	NA	NA	NA	NA	NA
s18v1-PF_29286	1038	2	0	2	No	NA	NA	NA	NA	NA	NA	NA	NA
s18v1-PF_29301	1603	2	0	1	No	NA	NA	NA	NA	NA	NA	NA	NA
s18v1-PF_29376	1291	5	0	0	No	NA	NA	NA	NA	NA	NA	NA	NA
s18v1-PF_29494	1265	3	0	1	No	NA	NA	NA	NA	NA	NA	NA	NA
s18v1-PF_29575	2200	5	1	0	No	NA	NA	NA	NA	NA	NA	NA	NA
s18v1-PF_29601	3048	4	0	0	No	NA	NA	NA	NA	NA	NA	NA	NA
s18v1-PF_29604	1383	2	0	1	No	NA	NA	NA	NA	NA	NA	NA	NA
s18v1-PF_29606	1029	2	0	0	No	NA	NA	NA	NA	NA	NA	NA	NA
s18v1-PF_29658	1314	1	0	1	No	NA	NA	NA	NA	NA	NA	NA	NA
s18v1-PF_29715	4180	4	0	3	No	NA	NA	NA	NA	NA	NA	NA	NA
s18v1-PF_29716	1347	2	0	0	No	NA	NA	NA	NA	NA	NA	NA	NA
s18v1-PF_29840	1228	2	0	0	No	NA	NA	NA	NA	NA	NA	NA	NA
s18v1-PF_30024	1847	1	0	1	No	NA	NA	NA	NA	NA	NA	NA	NA
s18v1-PF_30056	3786	6	0	0	No	NA	NA	NA	NA	NA	NA	NA	NA
s18v1-PF_30119	2140	4	0	1	No	NA	NA	NA	NA	NA	NA	NA	NA
s18v1-PF_30179	2717	3	0	3	No	NA	NA	NA	NA	NA	NA	NA	NA
s18v1-PF_30198	1018	3	0	2	No	NA	NA	NA	NA	NA	NA	NA	NA
s18v1-PF_30241	1447	1	0	1	No	NA	NA	NA	NA	NA	NA	NA	NA
s18v1-PF_30309	9555	23	0	0	No	NA	NA	NA	NA	NA	NA	NA	NA
s18v1-PF_30319	1066	1	0	0	No	NA	NA	NA	NA	NA	NA	NA	NA
s18v1-PF_30530	1003	1	1	0	No	NA	NA	NA	NA	NA	NA	NA	NA
s18v1-PF_30607	1206	1	0	0	No	NA	NA	NA	NA	NA	NA	NA	NA
s18v1-PF_30769	1428	1	0	1	No	NA	NA	NA	NA	NA	NA	NA	NA
s18v1-PF_30794	1515	1	0	0	No	NA	NA	NA	NA	NA	NA	NA	NA
s18v1-PF_30948	1065	2	0	0	No	NA	NA	NA	NA	NA	NA	NA	NA
s18v1-PF_30991	1065	2	0	1	No	NA	NA	NA	NA	NA	NA	NA	NA
s18v1-PF_31096	1202	3	0	0	No	NA	NA	NA	NA	NA	NA	NA	NA
s18v1-PF_31131	1411	2	0	2	No	NA	NA	NA	NA	NA	NA	NA	NA
s18v1-PF_31307	1101	2	0	1	No	NA	NA	NA	NA	NA	NA	NA	NA
s18v1-PF_31478	1403	4	0	4	No	NA	NA	NA	NA	NA	NA	NA	NA
s18v1-PF_31532	1591	2	0	0	No	NA	NA	NA	NA	NA	NA	NA	NA
s18v1-PF_31558	2068	2	0	1	No	NA	NA	NA	NA	NA	NA	NA	NA
s18v1-PF_31561	2649	2	0	0	No	NA	NA	NA	NA	NA	NA	NA	NA
s18v1-PF_31567	3625	4	0	1	No	NA	NA	NA	NA	NA	NA	NA	NA
s18v1-PF_31600	1521	2	0	1	No	NA	NA	NA	NA	NA	NA	NA	NA
s18v1-PF_31971	1125	2	0	1	No	NA	NA	NA	NA	NA	NA	NA	NA
s18v1-PF_31993	1231	1	0	0	No	NA	NA	NA	NA	NA	NA	NA	NA
s18v1-PF_32121	1458	1	0	1	No	NA	NA	NA	NA	NA	NA	NA	NA
s18v1-PF_32171	1625	1	0	0	No	NA	NA	NA	NA	NA	NA	NA	NA
s18v1-PF_32245	1874	3	0	3	No	NA	NA	NA	NA	NA	NA	NA	NA
s18v1-PF_32280	1078	1	0	1	No	NA	NA	NA	NA	NA	NA	NA	NA
s18v1-PF_32378	1417	2	0	1	No	NA	NA	NA	NA	NA	NA	NA	NA
s18v1-PF_32543	1134	3	0	1	No	NA	NA	NA	NA	NA	NA	NA	NA
s18v1-PF_32555	1194	1	0	1	No	NA	NA	NA	NA	NA	NA	NA	NA
s18v1-PF_32671	1063	1	0	1	No	NA	NA	NA	NA	NA	NA	NA	NA
s18v1-PF_32871	1189	2	0	0	No	NA	NA	NA	NA	NA	NA	NA	NA
s18v1-PF_32914	1013	1	0	1	No	NA	NA	NA	NA	NA	NA	NA	NA
s18v1-PF_32972	1364	2	0	1	No	NA	NA	NA	NA	NA	NA	NA	NA
s18v1-PF_32996	1103	2	0	0	No	NA	NA	NA	NA	NA	NA	NA	NA
s18v1-PF_33029	1328	3	0	0	No	NA	NA	NA	NA	NA	NA	NA	NA
s18v1-PF_33063	3918	4	0	3	No	NA	NA	NA	NA	NA	NA	NA	NA
s18v1-PF_33089	1036	2	0	0	No	NA	NA	NA	NA	NA	NA	NA	NA
s18v1-PF_33108	1628	2	0	1	No	NA	NA	NA	NA	NA	NA	NA	NA
s18v1-PF_33151	1252	2	0	0	No	NA	NA	NA	NA	NA	NA	NA	NA
s18v1-PF_33153	3458	4	0	3	No	NA	NA	NA	NA	NA	NA	NA	NA
s18v1-PF_33217	1402	1	1	0	No	NA	NA	NA	NA	NA	NA	NA	NA
s18v1-PF_33323	1040	2	0	0	No	NA	NA	NA	NA	NA	NA	NA	NA
s18v1-PF_33464	39882	67	24	0	No	NA	NA	NA	NA	NA	NA	NA	NA
s18v1-PF_33509	2508	3	0	1	No	NA	NA	NA	NA	NA	NA	NA	NA
s18v1-PF_33698	1143	1	0	0	No	NA	NA	NA	NA	NA	NA	NA	NA
s18v1-PF_33865	1489	2	1	0	No	NA	NA	NA	NA	NA	NA	NA	NA
s18v1-PF_33866	1800	1	0	0	No	NA	NA	NA	NA	NA	NA	NA	NA
s18v1-PF_33868	5643	6	0	2	No	NA	NA	NA	NA	NA	NA	NA	NA
s18v1-PF_33880	4522	7	0	0	No	NA	NA	NA	NA	NA	NA	NA	NA
s18v1-PF_34033	1614	1	0	0	No	NA	NA	NA	NA	NA	NA	NA	NA
s18v1-PF_34061	2476	1	0	1	No	NA	NA	NA	NA	NA	NA	NA	NA
s18v1-PF_34115	1155	3	0	3	No	NA	NA	NA	NA	NA	NA	NA	NA
s18v1-PF_34165	1319	2	0	0	No	NA	NA	NA	NA	NA	NA	NA	NA
s18v1-PF_34193	1089	3	0	1	No	NA	NA	NA	NA	NA	NA	NA	NA
s18v1-PF_34241	1332	2	0	1	No	NA	NA	NA	NA	NA	NA	NA	NA
s18v1-PF_34276	1034	2	0	2	No	NA	NA	NA	NA	NA	NA	NA	NA
s18v1-PF_34306	1209	2	0	0	No	NA	NA	NA	NA	NA	NA	NA	NA
s18v1-PF_34344	2845	3	0	1	No	NA	NA	NA	NA	NA	NA	NA	NA
s18v1-PF_34438	7065	4	1	2	No	NA	NA	NA	NA	NA	NA	NA	NA
s18v1-PF_34781	3922	4	0	3	No	NA	NA	NA	NA	NA	NA	NA	NA
s18v1-PF_34840	1518	1	0	0	No	NA	NA	NA	NA	NA	NA	NA	NA
s18v1-PF_34855	2546	3	0	3	No	NA	NA	NA	NA	NA	NA	NA	NA
s18v1-PF_35047	3532	5	0	0	No	NA	NA	NA	NA	NA	NA	NA	NA
s18v1-PF_35050	1351	3	1	0	No	NA	NA	NA	NA	NA	NA	NA	NA
s18v1-PF_35056	1115	1	0	1	No	NA	NA	NA	NA	NA	NA	NA	NA
s18v1-PF_35125	1389	2	0	2	No	NA	NA	NA	NA	NA	NA	NA	NA
s18v1-PF_35127	1177	1	0	1	No	NA	NA	NA	NA	NA	NA	NA	NA
s18v1-PF_35245	1058	1	0	1	No	NA	NA	NA	NA	NA	NA	NA	NA
s18v1-PF_35357	1023	2	0	0	No	NA	NA	NA	NA	NA	NA	NA	NA
s18v1-PF_35538	1184	2	0	0	No	NA	NA	NA	NA	NA	NA	NA	NA
s18v1-PF_35546	1760	3	0	3	No	NA	NA	NA	NA	NA	NA	NA	NA
s18v1-PF_35595	2496	4	0	3	No	NA	NA	NA	NA	NA	NA	NA	NA
s18v1-PF_35748	1005	1	0	0	No	NA	NA	NA	NA	NA	NA	NA	NA
s18v1-PF_35780	1454	1	0	1	No	NA	NA	NA	NA	NA	NA	NA	NA
s18v1-PF_35823	1075	1	0	0	No	NA	NA	NA	NA	NA	NA	NA	NA
s18v1-PF_35910	3320	3	0	3	No	NA	NA	NA	NA	NA	NA	NA	NA
s18v1-PF_35912	1104	1	0	1	No	NA	NA	NA	NA	NA	NA	NA	NA
s18v1-PF_35967	1030	2	0	2	No	NA	NA	NA	NA	NA	NA	NA	NA
s18v1-PF_36053	1942	3	0	0	No	NA	NA	NA	NA	NA	NA	NA	NA
s18v1-PF_36107	28489	56	9	0	No	NA	NA	NA	NA	NA	NA	NA	NA
s18v1-PF_36123	1098	2	0	1	No	NA	NA	NA	NA	NA	NA	NA	NA
s18v1-PF_36200	1644	5	0	0	No	NA	NA	NA	NA	NA	NA	NA	NA
s18v1-PF_36215	2969	3	2	0	No	NA	NA	NA	NA	NA	NA	NA	NA
s18v1-PF_36255	4579	5	0	4	No	NA	NA	NA	NA	NA	NA	NA	NA
s18v1-PF_36448	4108	2	0	2	No	NA	NA	NA	NA	NA	NA	NA	NA
s18v1-PF_36488	12491	17	3	0	No	NA	NA	NA	NA	NA	NA	NA	NA
s18v1-PF_36495	1857	3	0	3	No	NA	NA	NA	NA	NA	NA	NA	NA
s18v1-PF_36501	3500	4	0	3	No	NA	NA	NA	NA	NA	NA	NA	NA
s18v1-PF_36503	1329	1	0	0	No	NA	NA	NA	NA	NA	NA	NA	NA
s18v1-PF_36527	1005	2	0	1	No	NA	NA	NA	NA	NA	NA	NA	NA
s18v1-PF_36547	1497	1	0	0	No	NA	NA	NA	NA	NA	NA	NA	NA
s18v1-PF_36565	1737	3	0	0	No	NA	NA	NA	NA	NA	NA	NA	NA
s18v1-PF_36863	2341	3	0	2	No	NA	NA	NA	NA	NA	NA	NA	NA
s18v1-PF_36981	1426	4	0	3	No	NA	NA	NA	NA	NA	NA	NA	NA
s18v1-PF_37068	3030	2	0	2	No	NA	NA	NA	NA	NA	NA	NA	NA
s18v1-PF_37093	1112	2	0	2	No	NA	NA	NA	NA	NA	NA	NA	NA
s18v1-PF_37310	1039	1	0	1	No	NA	NA	NA	NA	NA	NA	NA	NA
s18v1-PF_37375	3350	2	0	2	No	NA	NA	NA	NA	NA	NA	NA	NA
s18v1-PF_37421	1796	1	0	1	No	NA	NA	NA	NA	NA	NA	NA	NA
s18v1-PF_37445	7060	5	0	4	No	NA	NA	NA	NA	NA	NA	NA	NA
s18v1-PF_37454	1206	2	0	1	No	NA	NA	NA	NA	NA	NA	NA	NA
s18v1-PF_37662	1190	1	0	1	No	NA	NA	NA	NA	NA	NA	NA	NA
s18v1-PF_37665	1457	2	0	1	No	NA	NA	NA	NA	NA	NA	NA	NA
s18v1-PF_37768	1318	2	0	2	No	NA	NA	NA	NA	NA	NA	NA	NA
s18v1-PF_37840	1590	2	0	0	No	NA	NA	NA	NA	NA	NA	NA	NA
s18v1-PF_37911	2227	3	0	0	No	NA	NA	NA	NA	NA	NA	NA	NA
s18v1-PF_37916	1592	1	0	1	No	NA	NA	NA	NA	NA	NA	NA	NA
s18v1-PF_38265	1267	1	0	1	No	NA	NA	NA	NA	NA	NA	NA	NA
s18v1-PF_38356	1875	1	0	0	No	NA	NA	NA	NA	NA	NA	NA	NA
s18v1-PF_38460	2735	4	0	1	No	NA	NA	NA	NA	NA	NA	NA	NA
s18v1-PF_38477	6135	6	0	6	No	NA	NA	NA	NA	NA	NA	NA	NA
s18v1-PF_38518	45432	72	16	1	No	NA	NA	NA	NA	NA	NA	NA	NA
s18v1-PF_38534	1912	5	1	0	No	NA	NA	NA	NA	NA	NA	NA	NA
s18v1-PF_38617	2730	4	0	0	No	NA	NA	NA	NA	NA	NA	NA	NA
s18v1-PF_38686	1040	3	0	1	No	NA	NA	NA	NA	NA	NA	NA	NA
s18v1-PF_38699	1363	2	0	2	No	NA	NA	NA	NA	NA	NA	NA	NA
s18v1-PF_38726	1241	2	0	0	No	NA	NA	NA	NA	NA	NA	NA	NA
s18v1-PF_38741	1239	1	0	1	No	NA	NA	NA	NA	NA	NA	NA	NA
s18v1-PF_38775	2230	1	0	0	No	NA	NA	NA	NA	NA	NA	NA	NA
s18v1-PF_38984	1445	3	0	0	No	NA	NA	NA	NA	NA	NA	NA	NA
s18v1-PF_39165	3224	4	0	4	No	NA	NA	NA	NA	NA	NA	NA	NA
s18v1-PF_39222	1753	4	0	0	No	NA	NA	NA	NA	NA	NA	NA	NA
s18v1-PF_39226	6299	3	0	3	No	NA	NA	NA	NA	NA	NA	NA	NA
s18v1-PF_39317	1661	2	0	1	No	NA	NA	NA	NA	NA	NA	NA	NA
s18v1-PF_39371	1359	1	0	0	No	NA	NA	NA	NA	NA	NA	NA	NA
s18v1-PF_39397	1751	3	0	0	No	NA	NA	NA	NA	NA	NA	NA	NA
s18v1-PF_39418	1212	1	0	0	No	NA	NA	NA	NA	NA	NA	NA	NA
s18v1-PF_39481	1228	1	0	1	No	NA	NA	NA	NA	NA	NA	NA	NA
s18v1-PF_39488	1938	2	0	0	No	NA	NA	NA	NA	NA	NA	NA	NA
s18v1-PF_39498	1135	2	0	2	No	NA	NA	NA	NA	NA	NA	NA	NA
s18v1-PF_39560	1089	2	0	2	No	NA	NA	NA	NA	NA	NA	NA	NA
s18v1-PF_39623	1195	2	0	0	No	NA	NA	NA	NA	NA	NA	NA	NA
s18v1-PF_39641	4684	3	0	2	No	NA	NA	NA	NA	NA	NA	NA	NA
s18v1-PF_39686	1229	2	0	1	No	NA	NA	NA	NA	NA	NA	NA	NA
s18v1-PF_39720	3746	5	0	1	No	NA	NA	NA	NA	NA	NA	NA	NA
s18v1-PF_39778	1078	2	0	1	No	NA	NA	NA	NA	NA	NA	NA	NA
s18v1-PF_39815	1366	2	0	1	No	NA	NA	NA	NA	NA	NA	NA	NA
s18v1-PF_39843	18718	21	0	9	No	NA	NA	NA	NA	NA	NA	NA	NA
s18v1-PF_39882	1220	3	0	0	No	NA	NA	NA	NA	NA	NA	NA	NA
s18v1-PF_39930	1401	1	0	1	No	NA	NA	NA	NA	NA	NA	NA	NA
s18v1-PF_39954	1067	2	0	0	No	NA	NA	NA	NA	NA	NA	NA	NA
s18v1-PF_39978	1463	1	0	0	No	NA	NA	NA	NA	NA	NA	NA	NA
s18v1-PF_39987	1129	1	0	1	No	NA	NA	NA	NA	NA	NA	NA	NA
s18v1-PF_40140	2165	1	0	0	No	NA	NA	NA	NA	NA	NA	NA	NA
s18v1-PF_40501	1478	2	0	1	No	NA	NA	NA	NA	NA	NA	NA	NA
s18v1-PF_40598	17110	25	6	1	No	NA	NA	NA	NA	NA	NA	NA	NA
s18v1-PF_40781	1082	2	0	0	No	NA	NA	NA	NA	NA	NA	NA	NA
s18v1-PF_40793	1233	3	1	0	No	NA	NA	NA	NA	NA	NA	NA	NA
s18v1-PF_40811	1441	2	0	0	No	NA	NA	NA	NA	NA	NA	NA	NA
s18v1-PF_40889	1191	2	0	0	No	NA	NA	NA	NA	NA	NA	NA	NA
s18v1-PF_41016	3822	3	0	2	No	NA	NA	NA	NA	NA	NA	NA	NA
s18v1-PF_41041	1199	3	0	1	No	NA	NA	NA	NA	NA	NA	NA	NA
s18v1-PF_41450	3837	1	0	1	No	NA	NA	NA	NA	NA	NA	NA	NA
s18v1-PF_41472	1667	4	0	1	No	NA	NA	NA	NA	NA	NA	NA	NA
s18v1-PF_41500	1066	3	0	0	No	NA	NA	NA	NA	NA	NA	NA	NA
s18v1-PF_41599	1998	2	0	1	No	NA	NA	NA	NA	NA	NA	NA	NA
s18v1-PF_41605	1977	3	1	0	No	NA	NA	NA	NA	NA	NA	NA	NA
s18v1-PF_41660	2870	4	0	3	No	NA	NA	NA	NA	NA	NA	NA	NA
s18v1-PF_41754	4817	1	0	0	No	NA	NA	NA	NA	NA	NA	NA	NA
s18v1-PF_41815	4428	6	0	1	No	NA	NA	NA	NA	NA	NA	NA	NA
s18v1-PF_41866	3476	2	0	2	No	NA	NA	NA	NA	NA	NA	NA	NA
s18v1-PF_41974	1174	1	1	0	No	NA	NA	NA	NA	NA	NA	NA	NA
s18v1-PF_42187	2362	2	0	1	No	NA	NA	NA	NA	NA	NA	NA	NA
s18v1-PF_42401	1199	2	0	0	No	NA	NA	NA	NA	NA	NA	NA	NA
s18v1-PF_42437	1594	2	0	1	No	NA	NA	NA	NA	NA	NA	NA	NA
s18v1-PF_42566	1029	2	0	0	No	NA	NA	NA	NA	NA	NA	NA	NA
s18v1-PF_42585	1652	3	0	1	No	NA	NA	NA	NA	NA	NA	NA	NA
s18v1-PF_42685	4473	5	0	4	No	NA	NA	NA	NA	NA	NA	NA	NA
s18v1-PF_42686	1099	1	0	0	No	NA	NA	NA	NA	NA	NA	NA	NA
s18v1-PF_42795	1844	2	0	0	No	NA	NA	NA	NA	NA	NA	NA	NA
s18v1-PF_43443	1302	3	0	3	No	NA	NA	NA	NA	NA	NA	NA	NA
s18v1-PF_43745	1143	4	0	0	No	NA	NA	NA	NA	NA	NA	NA	NA
s18v1-PF_43869	1027	1	0	1	No	NA	NA	NA	NA	NA	NA	NA	NA
s18v1-PF_43913	1688	2	2	0	No	NA	NA	NA	NA	NA	NA	NA	NA
s18v1-PF_43969	1749	2	0	1	No	NA	NA	NA	NA	NA	NA	NA	NA
s18v1-PF_44095	6763	10	0	0	No	NA	NA	NA	NA	NA	NA	NA	NA
s18v1-PF_44117	1299	2	0	0	No	NA	NA	NA	NA	NA	NA	NA	NA
s18v1-PF_44137	1930	3	0	1	No	NA	NA	NA	NA	NA	NA	NA	NA
s18v1-PF_44158	1949	4	0	2	No	NA	NA	NA	NA	NA	NA	NA	NA
s18v1-PF_44198	1771	2	0	1	No	NA	NA	NA	NA	NA	NA	NA	NA
s18v1-PF_44201	1472	1	0	1	No	NA	NA	NA	NA	NA	NA	NA	NA
s18v1-PF_44213	13483	10	3	0	No	NA	NA	NA	NA	NA	NA	NA	NA
s18v1-PF_44254	1107	2	0	1	No	NA	NA	NA	NA	NA	NA	NA	NA
s18v1-PF_44385	1352	2	0	1	No	NA	NA	NA	NA	NA	NA	NA	NA
s18v1-PF_44443	1149	2	0	1	No	NA	NA	NA	NA	NA	NA	NA	NA
s18v1-PF_44580	1234	2	0	0	No	NA	NA	NA	NA	NA	NA	NA	NA
s18v1-PF_44598	1274	3	0	0	No	NA	NA	NA	NA	NA	NA	NA	NA
s18v1-PF_44686	1047	1	0	1	No	NA	NA	NA	NA	NA	NA	NA	NA
s18v1-PF_44885	12282	19	7	0	No	NA	NA	NA	NA	NA	NA	NA	NA
s18v1-PF_44943	1930	2	0	1	No	NA	NA	NA	NA	NA	NA	NA	NA
s18v1-PF_44955	1366	1	0	0	No	NA	NA	NA	NA	NA	NA	NA	NA
s18v1-PF_45022	3368	6	0	1	No	NA	NA	NA	NA	NA	NA	NA	NA
s18v1-PF_45204	1252	2	0	2	No	NA	NA	NA	NA	NA	NA	NA	NA
s18v1-PF_45318	9668	12	6	0	No	NA	NA	NA	NA	NA	NA	NA	NA
s18v1-PF_45323	1321	3	0	3	No	NA	NA	NA	NA	NA	NA	NA	NA
s18v1-PF_45377	1321	1	0	0	No	NA	NA	NA	NA	NA	NA	NA	NA
s18v1-PF_45547	1236	1	0	1	No	NA	NA	NA	NA	NA	NA	NA	NA
s18v1-PF_45718	1714	1	0	0	No	NA	NA	NA	NA	NA	NA	NA	NA
s18v1-PF_45733	1229	1	0	1	No	NA	NA	NA	NA	NA	NA	NA	NA
s18v1-PF_45844	1073	2	0	2	No	NA	NA	NA	NA	NA	NA	NA	NA
s18v1-PF_45872	3366	3	0	3	No	NA	NA	NA	NA	NA	NA	NA	NA
s18v1-PF_45882	1379	3	0	1	No	NA	NA	NA	NA	NA	NA	NA	NA
s18v1-PF_45925	1043	2	0	1	No	NA	NA	NA	NA	NA	NA	NA	NA
s18v1-PF_46120	2393	2	0	0	No	NA	NA	NA	NA	NA	NA	NA	NA
s18v1-PF_46134	5372	9	2	0	No	NA	NA	NA	NA	NA	NA	NA	NA
s18v1-PF_46315	3181	2	0	0	No	NA	NA	NA	NA	NA	NA	NA	NA
s18v1-PF_46319	1212	1	0	1	No	NA	NA	NA	NA	NA	NA	NA	NA
s18v1-PF_46328	2135	7	1	0	No	NA	NA	NA	NA	NA	NA	NA	NA
s18v1-PF_46437	1202	1	0	1	No	NA	NA	NA	NA	NA	NA	NA	NA
s18v1-PF_46454	1168	1	0	1	No	NA	NA	NA	NA	NA	NA	NA	NA
s18v1-PF_46538	1448	1	0	0	No	NA	NA	NA	NA	NA	NA	NA	NA
s18v1-PF_46695	5796	3	0	2	No	NA	NA	NA	NA	NA	NA	NA	NA
s18v1-PF_46716	1345	2	0	1	No	NA	NA	NA	NA	NA	NA	NA	NA
s18v1-PF_46804	1530	2	0	2	No	NA	NA	NA	NA	NA	NA	NA	NA
s18v1-PF_46826	5710	10	1	0	No	NA	NA	NA	NA	NA	NA	NA	NA
s18v1-PF_46834	1067	1	0	1	No	NA	NA	NA	NA	NA	NA	NA	NA
s18v1-PF_46842	7316	8	0	6	No	NA	NA	NA	NA	NA	NA	NA	NA
s18v1-PF_46859	2141	5	0	0	No	NA	NA	NA	NA	NA	NA	NA	NA
s18v1-PF_47062	1783	1	0	0	No	NA	NA	NA	NA	NA	NA	NA	NA
s18v1-PF_47105	1036	2	0	0	No	NA	NA	NA	NA	NA	NA	NA	NA
s18v1-PF_47169	1350	2	0	2	No	NA	NA	NA	NA	NA	NA	NA	NA
s18v1-PF_47351	18118	26	8	0	No	NA	NA	NA	NA	NA	NA	NA	NA
s18v1-PF_47576	1148	2	0	1	No	NA	NA	NA	NA	NA	NA	NA	NA
s18v1-PF_48143	1155	1	0	1	No	NA	NA	NA	NA	NA	NA	NA	NA
s18v1-PF_48177	1533	1	0	1	No	NA	NA	NA	NA	NA	NA	NA	NA
s18v1-PF_48233	1059	2	0	1	No	NA	NA	NA	NA	NA	NA	NA	NA
s18v1-PF_48304	1182	3	0	0	No	NA	NA	NA	NA	NA	NA	NA	NA
s18v1-PF_48377	1866	2	0	1	No	NA	NA	NA	NA	NA	NA	NA	NA
s18v1-PF_48427	1634	2	0	0	No	NA	NA	NA	NA	NA	NA	NA	NA
s18v1-PF_48512	4617	6	0	2	No	NA	NA	NA	NA	NA	NA	NA	NA
s18v1-PF_48786	1227	1	0	1	No	NA	NA	NA	NA	NA	NA	NA	NA
s18v1-PF_48894	1579	4	0	4	No	NA	NA	NA	NA	NA	NA	NA	NA
s18v1-PF_48976	1082	2	0	0	No	NA	NA	NA	NA	NA	NA	NA	NA
s18v1-PF_48991	2713	5	0	0	No	NA	NA	NA	NA	NA	NA	NA	NA
s18v1-PF_48999	5191	7	0	3	No	NA	NA	NA	NA	NA	NA	NA	NA
s18v1-PF_49034	1309	2	0	1	No	NA	NA	NA	NA	NA	NA	NA	NA
s18v1-PF_49049	1002	1	0	0	No	NA	NA	NA	NA	NA	NA	NA	NA
s18v1-PF_49079	1037	3	0	0	No	NA	NA	NA	NA	NA	NA	NA	NA
s18v1-PF_49083	1091	3	0	0	No	NA	NA	NA	NA	NA	NA	NA	NA
s18v1-PF_49099	1367	4	1	0	No	NA	NA	NA	NA	NA	NA	NA	NA
s18v1-PF_49193	3410	4	2	0	No	NA	NA	NA	NA	NA	NA	NA	NA
s18v1-PF_49298	3337	2	0	2	No	NA	NA	NA	NA	NA	NA	NA	NA
s18v1-PF_49364	1682	2	0	2	No	NA	NA	NA	NA	NA	NA	NA	NA
s18v1-PF_49536	1396	2	0	2	No	NA	NA	NA	NA	NA	NA	NA	NA
s18v1-PF_49657	1124	2	0	1	No	NA	NA	NA	NA	NA	NA	NA	NA
s18v1-PF_49672	1202	2	0	1	No	NA	NA	NA	NA	NA	NA	NA	NA
s18v1-PF_49684	2147	2	0	0	No	NA	NA	NA	NA	NA	NA	NA	NA
s18v1-PF_49716	1470	1	0	1	No	NA	NA	NA	NA	NA	NA	NA	NA
s18v1-PF_49800	3813	5	0	4	No	NA	NA	NA	NA	NA	NA	NA	NA
s18v1-PF_49819	2644	1	0	0	No	NA	NA	NA	NA	NA	NA	NA	NA
s18v1-PF_49831	22910	31	15	0	No	NA	NA	NA	NA	NA	NA	NA	NA
s18v1-PF_49897	3483	3	0	3	No	NA	NA	NA	NA	NA	NA	NA	NA
s18v1-PF_49923	1898	1	0	0	No	NA	NA	NA	NA	NA	NA	NA	NA
s18v1-PF_50019	1197	1	0	1	No	NA	NA	NA	NA	NA	NA	NA	NA
s18v1-PF_50038	1092	2	0	0	No	NA	NA	NA	NA	NA	NA	NA	NA
s18v1-PF_50074	3013	3	0	3	No	NA	NA	NA	NA	NA	NA	NA	NA
s18v1-PF_50115	1040	1	0	0	No	NA	NA	NA	NA	NA	NA	NA	NA
s18v1-PF_50221	5680	5	0	2	No	NA	NA	NA	NA	NA	NA	NA	NA
s18v1-PF_50260	2583	3	0	3	No	NA	NA	NA	NA	NA	NA	NA	NA
s18v1-PF_50305	1080	2	0	2	No	NA	NA	NA	NA	NA	NA	NA	NA
s18v1-PF_50323	2007	3	0	1	No	NA	NA	NA	NA	NA	NA	NA	NA
s18v1-PF_50325	2083	1	0	0	No	NA	NA	NA	NA	NA	NA	NA	NA
s18v1-PF_50375	1004	2	0	0	No	NA	NA	NA	NA	NA	NA	NA	NA
s18v1-PF_50387	1223	1	0	1	No	NA	NA	NA	NA	NA	NA	NA	NA
s18v1-PF_50470	1885	4	0	2	No	NA	NA	NA	NA	NA	NA	NA	NA
s18v1-PF_50519	1133	2	0	0	No	NA	NA	NA	NA	NA	NA	NA	NA
s18v1-PF_50545	1269	2	0	2	No	NA	NA	NA	NA	NA	NA	NA	NA
s18v1-PF_50623	28872	36	17	0	No	NA	NA	NA	NA	NA	NA	NA	NA
s18v1-PF_50653	1001	1	0	0	No	NA	NA	NA	NA	NA	NA	NA	NA
s18v1-PF_50690	2741	2	0	2	No	NA	NA	NA	NA	NA	NA	NA	NA
s18v1-PF_50875	2749	2	0	0	No	NA	NA	NA	NA	NA	NA	NA	NA
s18v1-PF_50942	1239	1	0	1	No	NA	NA	NA	NA	NA	NA	NA	NA
s18v1-PF_50963	1120	1	0	1	No	NA	NA	NA	NA	NA	NA	NA	NA
s18v1-PF_50966	1017	1	0	1	No	NA	NA	NA	NA	NA	NA	NA	NA
s18v1-PF_51120	1051	2	0	0	No	NA	NA	NA	NA	NA	NA	NA	NA
s18v1-PF_51180	1113	1	0	1	No	NA	NA	NA	NA	NA	NA	NA	NA
s18v1-PF_51181	3294	6	0	0	No	NA	NA	NA	NA	NA	NA	NA	NA
s18v1-PF_51295	3010	4	0	2	No	NA	NA	NA	NA	NA	NA	NA	NA
s18v1-PF_51307	1122	2	0	0	No	NA	NA	NA	NA	NA	NA	NA	NA
s18v1-PF_51325	1096	1	0	1	No	NA	NA	NA	NA	NA	NA	NA	NA
s18v1-PF_51390	1164	1	1	0	No	NA	NA	NA	NA	NA	NA	NA	NA
s18v1-PF_51405	1102	2	0	1	No	NA	NA	NA	NA	NA	NA	NA	NA
s18v1-PF_51461	1086	2	0	1	No	NA	NA	NA	NA	NA	NA	NA	NA
s18v1-PF_51565	1048	3	0	1	No	NA	NA	NA	NA	NA	NA	NA	NA
s18v1-PF_51608	1428	1	0	1	No	NA	NA	NA	NA	NA	NA	NA	NA
s18v1-PF_51698	2235	3	0	2	No	NA	NA	NA	NA	NA	NA	NA	NA
s18v1-PF_51704	3360	5	0	2	No	NA	NA	NA	NA	NA	NA	NA	NA
s18v1-PF_51738	1013	1	0	1	No	NA	NA	NA	NA	NA	NA	NA	NA
s18v1-PF_51747	1241	2	0	1	No	NA	NA	NA	NA	NA	NA	NA	NA
s18v1-PF_51875	3458	4	0	1	No	NA	NA	NA	NA	NA	NA	NA	NA
s18v1-PF_51914	8101	18	0	0	No	NA	NA	NA	NA	NA	NA	NA	NA
s18v1-PF_51963	1737	2	0	1	No	NA	NA	NA	NA	NA	NA	NA	NA
s18v1-PF_52028	3934	7	0	0	No	NA	NA	NA	NA	NA	NA	NA	NA
s18v1-PF_52068	3379	3	0	2	No	NA	NA	NA	NA	NA	NA	NA	NA
s18v1-PF_52463	15341	19	3	0	No	NA	NA	NA	NA	NA	NA	NA	NA
s18v1-PF_52601	1328	2	0	2	No	NA	NA	NA	NA	NA	NA	NA	NA
s18v1-PF_52667	1295	2	0	0	No	NA	NA	NA	NA	NA	NA	NA	NA
s18v1-PF_52710	1097	2	0	1	No	NA	NA	NA	NA	NA	NA	NA	NA
s18v1-PF_52741	1328	1	0	1	No	NA	NA	NA	NA	NA	NA	NA	NA
s18v1-PF_53129	1082	1	0	1	No	NA	NA	NA	NA	NA	NA	NA	NA
s18v1-PF_53149	1517	1	0	1	No	NA	NA	NA	NA	NA	NA	NA	NA
s18v1-PF_53263	1044	1	0	0	No	NA	NA	NA	NA	NA	NA	NA	NA
s18v1-PF_53308	1006	1	0	0	No	NA	NA	NA	NA	NA	NA	NA	NA
s18v1-PF_53355	1512	2	0	1	No	NA	NA	NA	NA	NA	NA	NA	NA
s18v1-PF_53390	1796	2	1	0	No	NA	NA	NA	NA	NA	NA	NA	NA
s18v1-PF_53393	4122	4	0	2	No	NA	NA	NA	NA	NA	NA	NA	NA
s18v1-PF_53569	1076	2	0	0	No	NA	NA	NA	NA	NA	NA	NA	NA
s18v1-PF_53641	5290	3	0	2	No	NA	NA	NA	NA	NA	NA	NA	NA
s18v1-PF_53675	1099	2	0	2	No	NA	NA	NA	NA	NA	NA	NA	NA
s18v1-PF_53824	3345	6	0	0	No	NA	NA	NA	NA	NA	NA	NA	NA
s18v1-PF_53860	1113	3	0	2	No	NA	NA	NA	NA	NA	NA	NA	NA
s18v1-PF_53955	1023	2	0	1	No	NA	NA	NA	NA	NA	NA	NA	NA
s18v1-PF_53993	1367	1	0	1	No	NA	NA	NA	NA	NA	NA	NA	NA
s18v1-PF_54007	1215	1	0	1	No	NA	NA	NA	NA	NA	NA	NA	NA
s18v1-PF_54073	1136	2	0	0	No	NA	NA	NA	NA	NA	NA	NA	NA
s18v1-PF_54103	4142	6	0	1	No	NA	NA	NA	NA	NA	NA	NA	NA
s18v1-PF_54108	1425	2	0	1	No	NA	NA	NA	NA	NA	NA	NA	NA
s18v1-PF_54177	1918	2	0	2	No	NA	NA	NA	NA	NA	NA	NA	NA
s18v1-PF_54190	2372	6	0	0	No	NA	NA	NA	NA	NA	NA	NA	NA
s18v1-PF_54215	1687	4	0	0	No	NA	NA	NA	NA	NA	NA	NA	NA
s18v1-PF_54226	5780	4	0	2	No	NA	NA	NA	NA	NA	NA	NA	NA
s18v1-PF_54288	3151	3	0	2	No	NA	NA	NA	NA	NA	NA	NA	NA
s18v1-PF_54297	1027	2	0	2	No	NA	NA	NA	NA	NA	NA	NA	NA
s18v1-PF_54310	1561	2	0	0	No	NA	NA	NA	NA	NA	NA	NA	NA
s18v1-PF_54336	1156	4	0	0	No	NA	NA	NA	NA	NA	NA	NA	NA
s18v1-PF_54342	3399	2	0	0	No	NA	NA	NA	NA	NA	NA	NA	NA
s18v1-PF_54437	5177	13	2	0	No	NA	NA	NA	NA	NA	NA	NA	NA
s18v1-PF_54474	1495	2	0	2	No	NA	NA	NA	NA	NA	NA	NA	NA
s18v1-PF_54570	3779	3	0	2	No	NA	NA	NA	NA	NA	NA	NA	NA
s18v1-PF_54575	1173	1	0	1	No	NA	NA	NA	NA	NA	NA	NA	NA
s18v1-PF_54646	1050	1	0	1	No	NA	NA	NA	NA	NA	NA	NA	NA
s18v1-PF_54782	3681	8	1	0	No	NA	NA	NA	NA	NA	NA	NA	NA
s18v1-PF_54859	1405	4	0	1	No	NA	NA	NA	NA	NA	NA	NA	NA
s18v1-PF_54870	1017	2	0	1	No	NA	NA	NA	NA	NA	NA	NA	NA
s18v1-PF_54929	1027	2	0	2	No	NA	NA	NA	NA	NA	NA	NA	NA
s18v1-PF_54996	1211	2	0	0	No	NA	NA	NA	NA	NA	NA	NA	NA
s18v1-PF_55207	1016	2	0	2	No	NA	NA	NA	NA	NA	NA	NA	NA
s18v1-PF_55308	1868	3	0	0	No	NA	NA	NA	NA	NA	NA	NA	NA
s18v1-PF_55348	1427	1	0	1	No	NA	NA	NA	NA	NA	NA	NA	NA
s18v1-PF_55546	3072	4	0	3	No	NA	NA	NA	NA	NA	NA	NA	NA
s18v1-PF_55592	1109	2	0	0	No	NA	NA	NA	NA	NA	NA	NA	NA
s18v1-PF_55637	1026	2	0	1	No	NA	NA	NA	NA	NA	NA	NA	NA
s18v1-PF_56034	3364	4	0	0	No	NA	NA	NA	NA	NA	NA	NA	NA
s18v1-PF_56068	1003	1	0	0	No	NA	NA	NA	NA	NA	NA	NA	NA
s18v1-PF_56082	1195	2	0	1	No	NA	NA	NA	NA	NA	NA	NA	NA
s18v1-PF_56267	1582	3	1	0	No	NA	NA	NA	NA	NA	NA	NA	NA
s18v1-PF_56435	1415	4	0	0	No	NA	NA	NA	NA	NA	NA	NA	NA
s18v1-PF_56440	1575	3	1	0	No	NA	NA	NA	NA	NA	NA	NA	NA
s18v1-PF_56444	3794	5	0	1	No	NA	NA	NA	NA	NA	NA	NA	NA
s18v1-PF_56491	2057	2	0	1	No	NA	NA	NA	NA	NA	NA	NA	NA
s18v1-PF_56499	1402	3	1	0	No	NA	NA	NA	NA	NA	NA	NA	NA
s18v1-PF_56625	1479	1	0	1	No	NA	NA	NA	NA	NA	NA	NA	NA
s18v1-PF_56774	1452	2	0	1	No	NA	NA	NA	NA	NA	NA	NA	NA
s18v1-PF_56830	1293	1	0	1	No	NA	NA	NA	NA	NA	NA	NA	NA
s18v1-PF_56855	1314	2	0	0	No	NA	NA	NA	NA	NA	NA	NA	NA
s18v1-PF_56922	4673	5	0	3	No	NA	NA	NA	NA	NA	NA	NA	NA
s18v1-PF_56987	1269	2	0	2	No	NA	NA	NA	NA	NA	NA	NA	NA
s18v1-PF_57061	2339	1	0	0	No	NA	NA	NA	NA	NA	NA	NA	NA
s18v1-PF_57252	3761	5	0	3	No	NA	NA	NA	NA	NA	NA	NA	NA
s18v1-PF_57314	1591	3	0	0	No	NA	NA	NA	NA	NA	NA	NA	NA
s18v1-PF_57501	2227	4	0	0	No	NA	NA	NA	NA	NA	NA	NA	NA
s18v1-PF_57586	1066	1	0	0	No	NA	NA	NA	NA	NA	NA	NA	NA
s18v1-PF_57684	1613	2	0	2	No	NA	NA	NA	NA	NA	NA	NA	NA
s18v1-PF_57719	1476	1	0	1	No	NA	NA	NA	NA	NA	NA	NA	NA
s18v1-PF_57803	1344	1	0	1	No	NA	NA	NA	NA	NA	NA	NA	NA
s18v1-PF_57868	1574	1	0	1	No	NA	NA	NA	NA	NA	NA	NA	NA
s18v1-PF_57980	3259	6	0	3	No	NA	NA	NA	NA	NA	NA	NA	NA
s18v1-PF_58115	1822	3	0	1	No	NA	NA	NA	NA	NA	NA	NA	NA
s18v1-PF_58184	1040	1	0	0	No	NA	NA	NA	NA	NA	NA	NA	NA
s18v1-PF_58194	1039	1	0	1	No	NA	NA	NA	NA	NA	NA	NA	NA
s18v1-PF_58459	1994	3	0	2	No	NA	NA	NA	NA	NA	NA	NA	NA
s18v1-PF_58483	1172	1	0	1	No	NA	NA	NA	NA	NA	NA	NA	NA
s18v1-PF_58490	2128	5	0	5	No	NA	NA	NA	NA	NA	NA	NA	NA
s18v1-PF_58505	3363	2	0	1	No	NA	NA	NA	NA	NA	NA	NA	NA
s18v1-PF_58551	3186	5	0	0	No	NA	NA	NA	NA	NA	NA	NA	NA
s18v1-PF_58582	1399	3	0	1	No	NA	NA	NA	NA	NA	NA	NA	NA
s18v1-PF_58751	1019	1	0	0	No	NA	NA	NA	NA	NA	NA	NA	NA
s18v1-PF_58888	1571	2	0	2	No	NA	NA	NA	NA	NA	NA	NA	NA
s18v1-PF_58969	2289	5	0	0	No	NA	NA	NA	NA	NA	NA	NA	NA
s18v1-PF_58978	1591	3	0	0	No	NA	NA	NA	NA	NA	NA	NA	NA
s18v1-PF_59071	5702	7	0	4	No	NA	NA	NA	NA	NA	NA	NA	NA
s18v1-PF_59183	2256	1	0	0	No	NA	NA	NA	NA	NA	NA	NA	NA
s18v1-PF_59242	1737	1	0	1	No	NA	NA	NA	NA	NA	NA	NA	NA
s18v1-PF_59251	1124	2	0	1	No	NA	NA	NA	NA	NA	NA	NA	NA
s18v1-PF_59297	1202	1	0	1	No	NA	NA	NA	NA	NA	NA	NA	NA
s18v1-PF_59413	1345	1	1	0	No	NA	NA	NA	NA	NA	NA	NA	NA
s18v1-PF_59483	12657	13	4	1	No	NA	NA	NA	NA	NA	NA	NA	NA
s18v1-PF_59499	1552	3	0	1	No	NA	NA	NA	NA	NA	NA	NA	NA
s18v1-PF_59503	2313	2	0	1	No	NA	NA	NA	NA	NA	NA	NA	NA
s18v1-PF_59524	10642	13	0	3	No	NA	NA	NA	NA	NA	NA	NA	NA
s18v1-PF_59580	1701	4	0	3	No	NA	NA	NA	NA	NA	NA	NA	NA
s18v1-PF_59624	1704	4	0	3	No	NA	NA	NA	NA	NA	NA	NA	NA
s18v1-PF_59800	1319	2	0	1	No	NA	NA	NA	NA	NA	NA	NA	NA
s18v1-PF_60094	1183	1	0	1	No	NA	NA	NA	NA	NA	NA	NA	NA
s18v1-PF_60351	1494	2	0	2	No	NA	NA	NA	NA	NA	NA	NA	NA
s18v1-PF_60353	1962	2	0	1	No	NA	NA	NA	NA	NA	NA	NA	NA
s18v1-PF_60390	1565	3	0	2	No	NA	NA	NA	NA	NA	NA	NA	NA
s18v1-PF_60574	1586	5	0	0	No	NA	NA	NA	NA	NA	NA	NA	NA
s18v1-PF_60603	2573	3	0	2	No	NA	NA	NA	NA	NA	NA	NA	NA
s18v1-PF_60622	1047	1	0	0	No	NA	NA	NA	NA	NA	NA	NA	NA
s18v1-PF_60821	1827	2	0	1	No	NA	NA	NA	NA	NA	NA	NA	NA
s18v1-PF_60842	1123	2	0	2	No	NA	NA	NA	NA	NA	NA	NA	NA
s18v1-PF_60893	6191	6	0	3	No	NA	NA	NA	NA	NA	NA	NA	NA
s18v1-PF_60922	1184	1	0	1	No	NA	NA	NA	NA	NA	NA	NA	NA
s18v1-PF_61237	1113	2	0	1	No	NA	NA	NA	NA	NA	NA	NA	NA
s18v1-PF_61261	1024	2	0	0	No	NA	NA	NA	NA	NA	NA	NA	NA
s18v1-PF_61364	1231	2	0	0	No	NA	NA	NA	NA	NA	NA	NA	NA
s18v1-PF_61437	1732	1	0	0	No	NA	NA	NA	NA	NA	NA	NA	NA
s18v1-PF_61635	1263	1	0	1	No	NA	NA	NA	NA	NA	NA	NA	NA
s18v1-PF_61762	1499	3	0	2	No	NA	NA	NA	NA	NA	NA	NA	NA
s18v1-PF_62052	1444	1	0	1	No	NA	NA	NA	NA	NA	NA	NA	NA
s18v1-PF_62080	1963	7	0	0	No	NA	NA	NA	NA	NA	NA	NA	NA
s18v1-PF_62199	1327	4	0	0	No	NA	NA	NA	NA	NA	NA	NA	NA
s18v1-PF_62317	4653	6	0	2	No	NA	NA	NA	NA	NA	NA	NA	NA
s18v1-PF_62439	1871	3	0	3	No	NA	NA	NA	NA	NA	NA	NA	NA
s18v1-PF_62478	1252	2	0	2	No	NA	NA	NA	NA	NA	NA	NA	NA
s18v1-PF_62584	2077	3	0	1	No	NA	NA	NA	NA	NA	NA	NA	NA
s18v1-PF_62905	2001	2	0	1	No	NA	NA	NA	NA	NA	NA	NA	NA
s18v1-PF_62915	1736	2	0	1	No	NA	NA	NA	NA	NA	NA	NA	NA
s18v1-PF_62952	1960	1	0	1	No	NA	NA	NA	NA	NA	NA	NA	NA
s18v1-PF_62994	1074	2	0	0	No	NA	NA	NA	NA	NA	NA	NA	NA
s18v1-PF_63002	1129	3	0	0	No	NA	NA	NA	NA	NA	NA	NA	NA
s18v1-PF_63150	2054	3	0	1	No	NA	NA	NA	NA	NA	NA	NA	NA
s18v1-PF_63151	2268	4	0	0	No	NA	NA	NA	NA	NA	NA	NA	NA
s18v1-PF_63166	1417	2	0	1	No	NA	NA	NA	NA	NA	NA	NA	NA
s18v1-PF_63256	1342	1	0	0	No	NA	NA	NA	NA	NA	NA	NA	NA
s18v1-PF_63281	1183	1	0	1	No	NA	NA	NA	NA	NA	NA	NA	NA
s18v1-PF_63291	3997	4	0	4	No	NA	NA	NA	NA	NA	NA	NA	NA
s18v1-PF_63381	2666	4	0	2	No	NA	NA	NA	NA	NA	NA	NA	NA
s18v1-PF_63414	1196	1	0	1	No	NA	NA	NA	NA	NA	NA	NA	NA
s18v1-PF_63451	1186	2	0	1	No	NA	NA	NA	NA	NA	NA	NA	NA
s18v1-PF_63512	1005	2	0	1	No	NA	NA	NA	NA	NA	NA	NA	NA
s18v1-PF_63570	1337	3	0	0	No	NA	NA	NA	NA	NA	NA	NA	NA
s18v1-PF_63593	1396	2	0	1	No	NA	NA	NA	NA	NA	NA	NA	NA
s18v1-PF_63663	3212	4	1	0	No	NA	NA	NA	NA	NA	NA	NA	NA
s18v1-PF_63798	1512	1	0	0	No	NA	NA	NA	NA	NA	NA	NA	NA
s18v1-PF_63843	1041	1	0	0	No	NA	NA	NA	NA	NA	NA	NA	NA
s18v1-PF_63994	43542	51	28	0	No	NA	NA	NA	NA	NA	NA	NA	NA
s18v1-PF_64058	1138	1	0	0	No	NA	NA	NA	NA	NA	NA	NA	NA
s18v1-PF_64092	1091	1	0	1	No	NA	NA	NA	NA	NA	NA	NA	NA
s18v1-PF_64143	1076	2	0	2	No	NA	NA	NA	NA	NA	NA	NA	NA
s18v1-PF_64191	1404	1	0	1	No	NA	NA	NA	NA	NA	NA	NA	NA
s18v1-PF_64294	1287	2	0	0	No	NA	NA	NA	NA	NA	NA	NA	NA
s18v1-PF_64315	1446	2	0	1	No	NA	NA	NA	NA	NA	NA	NA	NA
s18v1-PF_64385	1132	2	0	1	No	NA	NA	NA	NA	NA	NA	NA	NA
s18v1-PF_64490	6974	10	0	2	No	NA	NA	NA	NA	NA	NA	NA	NA
s18v1-PF_64563	3330	4	0	2	No	NA	NA	NA	NA	NA	NA	NA	NA
s18v1-PF_64645	1535	1	0	1	No	NA	NA	NA	NA	NA	NA	NA	NA
s18v1-PF_64665	1098	2	0	1	No	NA	NA	NA	NA	NA	NA	NA	NA
s18v1-PF_64688	1543	3	0	0	No	NA	NA	NA	NA	NA	NA	NA	NA
s18v1-PF_64730	1124	2	0	1	No	NA	NA	NA	NA	NA	NA	NA	NA
s18v1-PF_64837	2183	1	0	1	No	NA	NA	NA	NA	NA	NA	NA	NA
s18v1-PF_64908	1915	1	0	1	No	NA	NA	NA	NA	NA	NA	NA	NA
s18v1-PF_65129	2077	1	0	1	No	NA	NA	NA	NA	NA	NA	NA	NA
s18v1-PF_65159	4296	4	0	2	No	NA	NA	NA	NA	NA	NA	NA	NA
s18v1-PF_65314	1055	2	0	0	No	NA	NA	NA	NA	NA	NA	NA	NA
s18v1-PF_65376	1636	1	0	0	No	NA	NA	NA	NA	NA	NA	NA	NA
s18v1-PF_65531	2440	3	0	2	No	NA	NA	NA	NA	NA	NA	NA	NA
s18v1-PF_65549	1216	1	0	0	No	NA	NA	NA	NA	NA	NA	NA	NA
s18v1-PF_65659	1632	2	0	1	No	NA	NA	NA	NA	NA	NA	NA	NA
s18v1-PF_65695	1081	1	0	0	No	NA	NA	NA	NA	NA	NA	NA	NA
s18v1-PF_65709	6643	11	3	0	No	NA	NA	NA	NA	NA	NA	NA	NA
s18v1-PF_65781	1156	2	0	1	No	NA	NA	NA	NA	NA	NA	NA	NA
s18v1-PF_65894	2393	3	0	1	No	NA	NA	NA	NA	NA	NA	NA	NA
s18v1-PF_65938	2069	2	0	2	No	NA	NA	NA	NA	NA	NA	NA	NA
s18v1-PF_66087	1254	1	0	1	No	NA	NA	NA	NA	NA	NA	NA	NA
s18v1-PF_66139	4492	5	0	0	No	NA	NA	NA	NA	NA	NA	NA	NA
s18v1-PF_66144	4109	4	0	1	No	NA	NA	NA	NA	NA	NA	NA	NA
s18v1-PF_66148	1437	2	0	1	No	NA	NA	NA	NA	NA	NA	NA	NA
s18v1-PF_66426	1647	2	0	2	No	NA	NA	NA	NA	NA	NA	NA	NA
s18v1-PF_66431	2225	3	0	0	No	NA	NA	NA	NA	NA	NA	NA	NA
s18v1-PF_66511	1692	3	1	0	No	NA	NA	NA	NA	NA	NA	NA	NA
s18v1-PF_66552	1254	2	0	0	No	NA	NA	NA	NA	NA	NA	NA	NA
s18v1-PF_66607	3443	3	0	0	No	NA	NA	NA	NA	NA	NA	NA	NA
s18v1-PF_66807	4532	3	0	3	No	NA	NA	NA	NA	NA	NA	NA	NA
s18v1-PF_66884	3251	2	0	2	No	NA	NA	NA	NA	NA	NA	NA	NA
s18v1-PF_66949	1759	2	0	0	No	NA	NA	NA	NA	NA	NA	NA	NA
s18v1-PF_66974	3047	3	0	0	No	NA	NA	NA	NA	NA	NA	NA	NA
s18v1-PF_66976	1344	2	0	0	No	NA	NA	NA	NA	NA	NA	NA	NA
s18v1-PF_66998	1228	2	0	2	No	NA	NA	NA	NA	NA	NA	NA	NA
s18v1-PF_67136	1080	1	0	0	No	NA	NA	NA	NA	NA	NA	NA	NA
s18v1-PF_67502	2633	5	0	0	No	NA	NA	NA	NA	NA	NA	NA	NA
s18v1-PF_67552	1073	2	0	0	No	NA	NA	NA	NA	NA	NA	NA	NA
s18v1-PF_67586	1197	2	0	0	No	NA	NA	NA	NA	NA	NA	NA	NA
s18v1-PF_67714	49481	73	21	0	No	NA	NA	NA	NA	NA	NA	NA	NA
s18v1-PF_67802	1321	4	0	1	No	NA	NA	NA	NA	NA	NA	NA	NA
s18v1-PF_67891	3668	2	0	2	No	NA	NA	NA	NA	NA	NA	NA	NA
s18v1-PF_67988	1454	2	0	1	No	NA	NA	NA	NA	NA	NA	NA	NA
s18v1-PF_68065	1067	2	0	1	No	NA	NA	NA	NA	NA	NA	NA	NA
s18v1-PF_68399	1112	2	0	0	No	NA	NA	NA	NA	NA	NA	NA	NA
s18v1-PF_68440	1612	1	0	1	No	NA	NA	NA	NA	NA	NA	NA	NA
s18v1-PF_68683	1130	1	0	1	No	NA	NA	NA	NA	NA	NA	NA	NA
s18v1-PF_68687	1102	2	0	0	No	NA	NA	NA	NA	NA	NA	NA	NA
s18v1-PF_68732	1174	3	0	1	No	NA	NA	NA	NA	NA	NA	NA	NA
s18v1-PF_68738	2527	2	0	0	No	NA	NA	NA	NA	NA	NA	NA	NA
s18v1-PF_68913	1015	3	0	0	No	NA	NA	NA	NA	NA	NA	NA	NA
s18v1-PF_69001	5206	6	0	1	No	NA	NA	NA	NA	NA	NA	NA	NA
s18v1-PF_69158	1206	1	0	0	No	NA	NA	NA	NA	NA	NA	NA	NA
s18v1-PF_69203	1107	2	0	2	No	NA	NA	NA	NA	NA	NA	NA	NA
s18v1-PF_69405	1661	3	0	1	No	NA	NA	NA	NA	NA	NA	NA	NA
s18v1-PF_69615	4910	4	0	1	No	NA	NA	NA	NA	NA	NA	NA	NA
s18v1-PF_69899	2233	3	0	2	No	NA	NA	NA	NA	NA	NA	NA	NA
s18v1-PF_70149	1656	1	0	0	No	NA	NA	NA	NA	NA	NA	NA	NA
s18v1-PF_70177	1006	1	0	0	No	NA	NA	NA	NA	NA	NA	NA	NA
s18v1-PF_70207	1832	4	0	3	No	NA	NA	NA	NA	NA	NA	NA	NA
s18v1-PF_70212	1132	2	0	1	No	NA	NA	NA	NA	NA	NA	NA	NA
s18v1-PF_70300	1174	2	0	2	No	NA	NA	NA	NA	NA	NA	NA	NA
s18v1-PF_70425	1431	2	0	1	No	NA	NA	NA	NA	NA	NA	NA	NA
s18v1-PF_70619	1402	2	0	1	No	NA	NA	NA	NA	NA	NA	NA	NA
s18v1-PF_70802	1798	2	0	0	No	NA	NA	NA	NA	NA	NA	NA	NA
s18v1-PF_70953	1022	1	0	0	No	NA	NA	NA	NA	NA	NA	NA	NA
s18v1-PF_71004	1161	1	0	1	No	NA	NA	NA	NA	NA	NA	NA	NA
s18v1-PF_71111	1223	2	2	0	No	NA	NA	NA	NA	NA	NA	NA	NA
s18v1-PF_71190	3322	5	0	1	No	NA	NA	NA	NA	NA	NA	NA	NA
s18v1-PF_71215	1302	3	0	0	No	NA	NA	NA	NA	NA	NA	NA	NA
s18v1-PF_71257	1225	1	0	1	No	NA	NA	NA	NA	NA	NA	NA	NA
s18v1-PF_71366	1126	5	1	0	No	NA	NA	NA	NA	NA	NA	NA	NA
s18v1-PF_71368	1188	2	0	1	No	NA	NA	NA	NA	NA	NA	NA	NA
s18v1-PF_71462	4534	6	0	0	No	NA	NA	NA	NA	NA	NA	NA	NA
s18v1-PF_71478	1117	1	0	1	No	NA	NA	NA	NA	NA	NA	NA	NA
s18v1-PF_71553	1043	2	0	2	No	NA	NA	NA	NA	NA	NA	NA	NA
s18v1-PF_71659	1210	1	0	1	No	NA	NA	NA	NA	NA	NA	NA	NA
s18v1-PF_71709	1016	2	1	0	No	NA	NA	NA	NA	NA	NA	NA	NA
s18v1-PF_71782	1055	1	0	1	No	NA	NA	NA	NA	NA	NA	NA	NA
s18v1-PF_71930	1394	2	0	1	No	NA	NA	NA	NA	NA	NA	NA	NA
s18v1-PF_72000	1495	2	0	2	No	NA	NA	NA	NA	NA	NA	NA	NA
s18v1-PF_72050	1049	1	0	1	No	NA	NA	NA	NA	NA	NA	NA	NA
s18v1-PF_72122	3783	2	0	1	No	NA	NA	NA	NA	NA	NA	NA	NA
s18v1-PF_72155	1436	3	0	2	No	NA	NA	NA	NA	NA	NA	NA	NA
s18v1-PF_72222	1125	2	0	0	No	NA	NA	NA	NA	NA	NA	NA	NA
s18v1-PF_72224	1331	3	0	0	No	NA	NA	NA	NA	NA	NA	NA	NA
s18v1-PF_72285	78884	82	6	0	No	NA	NA	NA	NA	NA	NA	NA	NA
s18v1-PF_72370	1088	1	0	1	No	NA	NA	NA	NA	NA	NA	NA	NA
s18v1-PF_72438	1482	5	0	4	No	NA	NA	NA	NA	NA	NA	NA	NA
s18v1-PF_72494	9770	14	0	0	No	NA	NA	NA	NA	NA	NA	NA	NA
s18v1-PF_72542	5510	5	0	1	No	NA	NA	NA	NA	NA	NA	NA	NA
s18v1-PF_72555	1381	2	0	1	No	NA	NA	NA	NA	NA	NA	NA	NA
s18v1-PF_72647	2998	2	0	1	No	NA	NA	NA	NA	NA	NA	NA	NA
s18v1-PF_72688	1240	1	0	1	No	NA	NA	NA	NA	NA	NA	NA	NA
s18v1-PF_72712	1818	3	0	3	No	NA	NA	NA	NA	NA	NA	NA	NA
s18v1-PF_72885	1158	2	0	2	No	NA	NA	NA	NA	NA	NA	NA	NA
s18v1-PF_72938	2061	1	0	0	No	NA	NA	NA	NA	NA	NA	NA	NA
s18v1-PF_73242	1123	1	0	0	No	NA	NA	NA	NA	NA	NA	NA	NA
s18v1-PF_73393	1233	1	0	1	No	NA	NA	NA	NA	NA	NA	NA	NA
s18v1-PF_73410	6520	13	2	0	No	NA	NA	NA	NA	NA	NA	NA	NA
s18v1-PF_73461	1630	2	0	2	No	NA	NA	NA	NA	NA	NA	NA	NA
s18v1-PF_73637	1125	2	0	1	No	NA	NA	NA	NA	NA	NA	NA	NA
s18v1-PF_73652	1280	4	0	2	No	NA	NA	NA	NA	NA	NA	NA	NA
s18v1-PF_73734	1331	2	0	0	No	NA	NA	NA	NA	NA	NA	NA	NA
s18v1-PF_73771	1048	1	0	0	No	NA	NA	NA	NA	NA	NA	NA	NA
s18v1-PF_74091	3154	2	0	2	No	NA	NA	NA	NA	NA	NA	NA	NA
s18v1-PF_74122	1100	3	0	1	No	NA	NA	NA	NA	NA	NA	NA	NA
s18v1-PF_74181	1260	2	0	2	No	NA	NA	NA	NA	NA	NA	NA	NA
s18v1-PF_74282	2145	1	0	1	No	NA	NA	NA	NA	NA	NA	NA	NA
s18v1-PF_74352	1411	1	0	0	No	NA	NA	NA	NA	NA	NA	NA	NA
s18v1-PF_74430	1146	1	0	1	No	NA	NA	NA	NA	NA	NA	NA	NA
s18v1-PF_74695	2187	1	0	1	No	NA	NA	NA	NA	NA	NA	NA	NA
s18v1-PF_74836	1118	1	1	0	No	NA	NA	NA	NA	NA	NA	NA	NA
s18v1-PF_75021	4754	2	0	2	No	NA	NA	NA	NA	NA	NA	NA	NA
s18v1-PF_75032	1156	3	0	1	No	NA	NA	NA	NA	NA	NA	NA	NA
s18v1-PF_75082	2608	2	0	1	No	NA	NA	NA	NA	NA	NA	NA	NA
s18v1-PF_75116	1168	1	0	0	No	NA	NA	NA	NA	NA	NA	NA	NA
s18v1-PF_75209	3890	2	0	2	No	NA	NA	NA	NA	NA	NA	NA	NA
s18v1-PF_75318	2042	2	0	1	No	NA	NA	NA	NA	NA	NA	NA	NA
s18v1-PF_75374	1367	2	0	1	No	NA	NA	NA	NA	NA	NA	NA	NA
s18v1-PF_75451	1700	1	0	1	No	NA	NA	NA	NA	NA	NA	NA	NA
s18v1-PF_75543	1052	3	0	0	No	NA	NA	NA	NA	NA	NA	NA	NA
s18v1-PF_75549	1378	1	0	1	No	NA	NA	NA	NA	NA	NA	NA	NA
s18v1-PF_75575	1015	2	0	1	No	NA	NA	NA	NA	NA	NA	NA	NA
s18v1-PF_75640	1132	3	0	0	No	NA	NA	NA	NA	NA	NA	NA	NA
s18v1-PF_75713	3964	3	0	2	No	NA	NA	NA	NA	NA	NA	NA	NA
s18v1-PF_75807	1176	2	0	0	No	NA	NA	NA	NA	NA	NA	NA	NA
s18v1-PF_75852	2309	4	0	1	No	NA	NA	NA	NA	NA	NA	NA	NA
s18v1-PF_75864	1193	2	0	0	No	NA	NA	NA	NA	NA	NA	NA	NA
s18v1-PF_76122	1809	2	0	2	No	NA	NA	NA	NA	NA	NA	NA	NA
s18v1-PF_76367	3985	4	0	4	No	NA	NA	NA	NA	NA	NA	NA	NA
s18v1-PF_76418	1462	3	0	3	No	NA	NA	NA	NA	NA	NA	NA	NA
s18v1-PF_76460	1827	2	0	2	No	NA	NA	NA	NA	NA	NA	NA	NA
s18v1-PF_76725	1306	1	0	0	No	NA	NA	NA	NA	NA	NA	NA	NA
s18v1-PF_76861	1911	1	0	1	No	NA	NA	NA	NA	NA	NA	NA	NA
s18v1-PF_76952	2197	2	0	0	No	NA	NA	NA	NA	NA	NA	NA	NA
s18v1-PF_77070	1815	4	0	1	No	NA	NA	NA	NA	NA	NA	NA	NA
s18v1-PF_77145	1057	1	0	1	No	NA	NA	NA	NA	NA	NA	NA	NA
s18v1-PF_77154	1989	3	0	1	No	NA	NA	NA	NA	NA	NA	NA	NA
s18v1-PF_77262	1022	1	0	1	No	NA	NA	NA	NA	NA	NA	NA	NA
s18v1-PF_77328	1360	2	0	0	No	NA	NA	NA	NA	NA	NA	NA	NA
s18v1-PF_77491	2451	3	0	2	No	NA	NA	NA	NA	NA	NA	NA	NA
s18v1-PF_77640	3052	2	1	0	No	NA	NA	NA	NA	NA	NA	NA	NA
s18v1-PF_78080	1251	1	0	0	No	NA	NA	NA	NA	NA	NA	NA	NA
s18v1-PF_78113	1391	1	0	0	No	NA	NA	NA	NA	NA	NA	NA	NA
s18v1-PF_78175	1049	1	0	1	No	NA	NA	NA	NA	NA	NA	NA	NA
s18v1-PF_78356	1162	1	0	1	No	NA	NA	NA	NA	NA	NA	NA	NA
s18v1-PF_78396	1378	2	0	1	No	NA	NA	NA	NA	NA	NA	NA	NA
s18v1-PF_78437	2097	3	0	3	No	NA	NA	NA	NA	NA	NA	NA	NA
s18v1-PF_78485	1094	3	0	0	No	NA	NA	NA	NA	NA	NA	NA	NA
s18v1-PF_78507	1027	2	0	1	No	NA	NA	NA	NA	NA	NA	NA	NA
s18v1-PF_78651	1874	1	0	0	No	NA	NA	NA	NA	NA	NA	NA	NA
s18v1-PF_78669	16276	18	8	0	No	NA	NA	NA	NA	NA	NA	NA	NA
s18v1-PF_78719	1129	1	0	0	No	NA	NA	NA	NA	NA	NA	NA	NA
s18v1-PF_78859	2772	3	0	0	No	NA	NA	NA	NA	NA	NA	NA	NA
s18v1-PF_78904	2455	2	0	1	No	NA	NA	NA	NA	NA	NA	NA	NA
s18v1-PF_78949	1576	1	0	1	No	NA	NA	NA	NA	NA	NA	NA	NA
s18v1-PF_79006	4590	9	1	1	Yes	3318	1272	host,viral	12723318	1-1272,1273-4590	1-3,4-9	0,1	1,0
s18v1-PF_79071	3066	2	0	2	No	NA	NA	NA	NA	NA	NA	NA	NA
s18v1-PF_79089	1160	3	0	2	No	NA	NA	NA	NA	NA	NA	NA	NA
s18v1-PF_79464	2079	1	0	1	No	NA	NA	NA	NA	NA	NA	NA	NA
s18v1-PF_79557	6959	10	0	1	No	NA	NA	NA	NA	NA	NA	NA	NA
s18v1-PF_79712	1023	1	0	1	No	NA	NA	NA	NA	NA	NA	NA	NA
s18v1-PF_79748	5083	5	0	0	No	NA	NA	NA	NA	NA	NA	NA	NA
s18v1-PF_79755	1198	1	0	1	No	NA	NA	NA	NA	NA	NA	NA	NA
s18v1-PF_79849	1313	2	0	2	No	NA	NA	NA	NA	NA	NA	NA	NA
s18v1-PF_79873	2911	2	0	2	No	NA	NA	NA	NA	NA	NA	NA	NA
s18v1-PF_79884	1663	3	0	1	No	NA	NA	NA	NA	NA	NA	NA	NA
s18v1-PF_79917	1177	1	0	0	No	NA	NA	NA	NA	NA	NA	NA	NA
s18v1-PF_80107	3110	3	0	0	No	NA	NA	NA	NA	NA	NA	NA	NA
s18v1-PF_80200	3158	3	0	2	No	NA	NA	NA	NA	NA	NA	NA	NA
s18v1-PF_80228	2719	1	0	1	No	NA	NA	NA	NA	NA	NA	NA	NA
s18v1-PF_80300	2731	2	0	2	No	NA	NA	NA	NA	NA	NA	NA	NA
s18v1-PF_80354	1426	3	0	0	No	NA	NA	NA	NA	NA	NA	NA	NA
s18v1-PF_80401	1492	3	0	0	No	NA	NA	NA	NA	NA	NA	NA	NA
s18v1-PF_80490	1060	1	0	1	No	NA	NA	NA	NA	NA	NA	NA	NA
s18v1-PF_80610	2061	3	0	2	No	NA	NA	NA	NA	NA	NA	NA	NA
s18v1-PF_80683	1354	1	0	1	No	NA	NA	NA	NA	NA	NA	NA	NA
s18v1-PF_80698	1126	3	0	1	No	NA	NA	NA	NA	NA	NA	NA	NA
s18v1-PF_80750	5858	8	0	1	No	NA	NA	NA	NA	NA	NA	NA	NA
s18v1-PF_80891	1466	2	0	2	No	NA	NA	NA	NA	NA	NA	NA	NA
s18v1-PF_80900	1506	1	0	1	No	NA	NA	NA	NA	NA	NA	NA	NA
s18v1-PF_80996	1278	1	0	0	No	NA	NA	NA	NA	NA	NA	NA	NA
s18v1-PF_81186	1131	2	0	1	No	NA	NA	NA	NA	NA	NA	NA	NA
s18v1-PF_81236	1157	2	0	2	No	NA	NA	NA	NA	NA	NA	NA	NA
s18v1-PF_81245	1180	3	0	2	No	NA	NA	NA	NA	NA	NA	NA	NA
s18v1-PF_81246	2401	2	0	2	No	NA	NA	NA	NA	NA	NA	NA	NA
s18v1-PF_81581	1021	3	0	3	No	NA	NA	NA	NA	NA	NA	NA	NA
s18v1-PF_81643	7621	7	0	1	No	NA	NA	NA	NA	NA	NA	NA	NA
s18v1-PF_81781	1831	5	0	5	No	NA	NA	NA	NA	NA	NA	NA	NA
s18v1-PF_81856	2633	3	0	2	No	NA	NA	NA	NA	NA	NA	NA	NA
s18v1-PF_81895	1768	1	0	0	No	NA	NA	NA	NA	NA	NA	NA	NA
s18v1-PF_81926	1887	2	0	2	No	NA	NA	NA	NA	NA	NA	NA	NA
s18v1-PF_82199	1193	1	0	1	No	NA	NA	NA	NA	NA	NA	NA	NA
s18v1-PF_82274	3180	6	0	4	No	NA	NA	NA	NA	NA	NA	NA	NA
s18v1-PF_82301	1524	1	0	1	No	NA	NA	NA	NA	NA	NA	NA	NA
s18v1-PF_82627	2204	4	0	2	No	NA	NA	NA	NA	NA	NA	NA	NA
s18v1-PF_82688	1175	1	0	0	No	NA	NA	NA	NA	NA	NA	NA	NA
s18v1-PF_82734	1351	1	0	0	No	NA	NA	NA	NA	NA	NA	NA	NA
s18v1-PF_82757	1243	2	0	2	No	NA	NA	NA	NA	NA	NA	NA	NA
s18v1-PF_82843	2883	3	0	2	No	NA	NA	NA	NA	NA	NA	NA	NA
s18v1-PF_82891	2071	3	0	1	No	NA	NA	NA	NA	NA	NA	NA	NA
s18v1-PF_83161	1002	3	0	0	No	NA	NA	NA	NA	NA	NA	NA	NA
s18v1-PF_83175	1115	1	0	1	No	NA	NA	NA	NA	NA	NA	NA	NA
s18v1-PF_83220	1371	3	0	1	No	NA	NA	NA	NA	NA	NA	NA	NA
s18v1-PF_83233	1303	2	0	1	No	NA	NA	NA	NA	NA	NA	NA	NA
s18v1-PF_83246	1269	1	0	1	No	NA	NA	NA	NA	NA	NA	NA	NA
s18v1-PF_83277	1917	2	0	1	No	NA	NA	NA	NA	NA	NA	NA	NA
s18v1-PF_83543	1051	2	0	1	No	NA	NA	NA	NA	NA	NA	NA	NA
s18v1-PF_83579	1924	3	0	0	No	NA	NA	NA	NA	NA	NA	NA	NA
[truncated: 7,194 more rows]

## Sheet: complete_genomes
contig_id	contig_length	kmer_freq	prediction_type	confidence_level	confidence_reason	repeat_length	repeat_count	repeat_n_freq	repeat_mode_base_freq	repeat_seq
s18v1_3799	1404	1	ITR	low	AAI-based completeness < 80%	119	1	0	0.336134	TTTGCGAGTTCTGTTTTTGCGTTCAAAGGCTCGTGCCCCTTTCGATTTTTGATGTATATTCATTATACATCAAGCCTCAAAAAGCGGGCACTTTACGACGCATTAGACCGCTATGACGG
s18v1_8738	45595	1	DTR	high	AAI-based completeness > 90%	38	4	0	0.315789	AACACCGGGGACTGGAACACCGGGAACTGCAACACCGG
s18v1_15701	178707	1	DTR	high	AAI-based completeness > 90%	141	2	0	0.35461	TAAGAGAATAGGAGCGTAAAAGGAAATGAAGAAAATTCGTAAAATGATTTGCATTGCAACTATTACATTGATGGCTTGTTTCGCTTGTACGGCTTGTGGGACTACATACCAGGAAGCGGTATCAGAAGAATATGCCACAGA
s18v1_23246	46422	1	DTR	high	AAI-based completeness > 90%	108	2	0	0.398148	AGTCATATTATTATCAAGAGAATGATAAAATTGTTGAAGAAATTCCAACAACTATTTTCCAAATTCAAAAATTATTTGCGGAGCATAAAGGTGAGATTGCTCTTTCAA
s18v1_23672	45481	1	DTR	high	AAI-based completeness > 90%	141	2	0	0.397163	AAGTCTTCATAAACAGCAAGTTTCGTAAGAATTTTATCCGCAAACGGTTTTAATAATCCATCCGTAATTTCTTCTTTTGCAACTCCTGTACCATCAACATTTCTTTCTCTTTCTGTTAATCTCTCCATCTACTTCACCTCT
s18v1_27544	36625	1	DTR	high	AAI-based completeness > 90%	141	2	0	0.312057	ATCTGCGGCTTCGGCTGCTGCCTTCTTTGCGGCGCGTGTGGCTGCTGCCTTCTTTGCGGCTTCGCTACGCTTAAGCGCTGCGGTTTCCTCCTCGCTCAACTCGGCTACGGGTTCAACGGGTTCAACGGGTTCAACGGGTTC
s18v1_31420	15073	1	ITR	not-determined	NA	141	1	0	0.340426	TCGTAACACATCACCACGCGACACACGACGGCCAGAGAGCGCGAGACGAGGAGACGACGAAGAGAGCGACGCCCGGAGCACAAACGCCCATACAGACCGTTACACACCACGCTACACCATAGTACATATTTTTGGACGAAA
s18v1_36641	135400	1	DTR	high	AAI-based completeness > 90%	141	2	0	0.319149	ACATTGCAGAAATTGTTATTGTTGTTGTAATTAGCAGAGCGGAGCCACCACCACGCCGCCAAAGGCGGCGAAAACACCAAGGACACGTTTTCAGAAATACACCCAATAAAGATTTAGCTCTTTTTGATTTGCCCTAACGAT
s18v1_37635	49496	1	DTR	high	AAI-based completeness > 90%	141	2	0	0.319149	CATTCGTTCACATAATCGGCGGCGGACATGATTTCAAACTTCTCTGTGTCGGTAACGATGAAAAGTTCACCGTTACCATCACGAATTTCGTGTTTCTCACCGTTTGATAATTCAATATCAACCAGCTGCATATGTTTCGGA
s18v1_40389	1848	1	DTR	not-determined	NA	59	2	0	0.40678	GGAATCGAATGGATTGATATCAAATGGAATGGAATGGAAGGGAATGGAATGGAATGGAA
s18v1_42074	36484	1	DTR	high	AAI-based completeness > 90%	141	2	0	0.326241	ATGAAATTTTTGATTTAACCCAAATGTTTGGTATAGGTAACGAACCCACAAGCGTGGAAGAATTTGAAGCCATGTTCCCTAATAACTATTACCAGTATAACGCTGGCGAGATTATAACTGCCGATACAGAGAGCGTTGTGG
s18v1_43059	64399	1	DTR	high	AAI-based completeness > 90%	141	2	0	0.340426	AGGAGGGGCGATTGGGTCTCTCCTATATATAATAATGTGTAGTGGATGCTATATGCTTATGCCATACTTTCGGGCTTGCTTGCGGAAGAAAGCCTTCTTGTTGGCGAAGAACCTGATGAGCGATTTGTTCCACTTCTTTTC
s18v1_60466	54183	1	DTR	high	AAI-based completeness > 90%	69	2	0	0.391304	AGCACCATTTCCTCCGCAGCCATAAGAACCGCCGCCGCCGCCACCATTTGGGGAACTTCTTACCGATCT
s18v1_73099	45919	1	DTR	high	AAI-based completeness > 90%	141	2	0	0.326241	GCAGGGCGGCTATCTCGTCGCACTCCTCCTGCGTTAGGTCGCGGTTCTCGGTTGCAGCAGCCTGGTAGATCGCCGTGATGCGCGATTTGGCGGCGGTCGTGTTCTCCTCAACGCTTGCGTAGTGGCCCTCGATGTTCTCGC
s18v1_73163	97817	1	DTR	high	AAI-based completeness > 90%	141	2	0	0.333333	TCAGGGCGGCGGGAGCGCCCAGGTTAACTGGGACGACATCCAGGGCAAGCCCGACATGTCCACCTACGCACTGAAGGCTGACCTCCTCCAGACCATCACCCTCACGGGTACGGCTCAAGGCACCGGAACGGTCGAGGGTAA
s18v1_73164	39182	1	DTR	not-determined	NA	141	2	0	0.29078	AACGCTTTACACGCTACCGATATAGCATCTGTATACGCCATTTTAAAAGCTTCGTCGGAAGTATCAGGCTTTTCCTTAAAGACATTGACAAACATAGAGCCACCGACACCAATAATCGGCTTGCTCCACTCGCCGCCCTGT
s18v1_73168	32967	1	DTR	high	AAI-based completeness > 90%	141	2	0	0.375887	ACAGGGCGGAGCCAAGCGATGAGTAGGTGGTCTGGTGTCTGCACGCTCATCGCGACTGAGACAGAGCGCGATGAGAAGGGCGTCCCGCACAGGAAGGAACGCCGCAGGCGCGTGCCGTGCAACGTCTTCTCGATGAGCGCG
s18v1_73172	63313	1	DTR	high	AAI-based completeness > 90%	141	2	0	0.269504	AGAATTTGAATGCTGAGGCTTCTTCCCGGCTGAGGCTACAACTGTAGGATTGTCGAAGGTTCCTTCCATCAGAGCCTCGTAGTTCTTCGGATTGAAGAGCCAGTTGAAGGAGATATAGCATCCACCATCCTTGCGCCCTGA
s18v1_73174	36966	1	DTR	high	AAI-based completeness > 90%	141	2	0	0.319149	ACTCCCAGAAGTTTTTTTCTACTCAAAACTTTATCACAATGCGCTGCAAAGTATCTGTTCTTGTAGTCTGTTCCCTCTGTCGCCTTCACGATGCAGAAGTCATACGCTATCTTACCGAGATCTATGCCGGCATCGCCCTGC
s18v1_73176	81999	1	DTR	high	AAI-based completeness > 90%	141	2	0	0.326241	ACAGGGCCTAACTAATAAGGTATCTACAATATGGAATTTCTAGATCAGGCTAAGAAAGCCCACACCCTGGCTACAATCGCGGATTTTCATTTGGCGCTAACGTTGGCCTTAGTCTAATATATATAAAATTGATCTAATATG
s18v1_73178	78898	1	DTR	high	AAI-based completeness > 90%	141	2	0	0.276596	GGCTCTTCTATATAGCTCTCCAGAATAGGCCGAAGGTTCTTCTTCAAGTAGAGATTGAGACGTACTATTGAAATGAACTTTTCGGAGTCATCCACGGGATTGGAAGTGAATCCATTCCAAAGCATAGTACGCTGGCCCTGA
s18v1_73179	47040	1	DTR	high	AAI-based completeness > 90%	141	2	0	0.333333	TCAGGGCATTTGCCGTTTTCTTGTCCCCGGCTTTCTTTGCTTTCATTCTCTCTTCCAACATATCCACGAAAATCTGAGGTGATGGTATATTCCTGCTACAGAACCCGTACTGTTGACCTGCTGAAAGTGGAACAGTCATAA
s18v1-PF_591	3695	1	DTR	not-determined	NA	141	2	0	0.425532	ACGGAATTGAATTGAATGGAATCGAATGCAATGGAATCTAATGAAACGGAAAGGAAAGGAATGGAATGGAATGGAATGGGCTGGAATGGAAAGGAATCGAAACGAATGGAATGGAATCGAACTGAAGAGACTGGAATGGAA
s18v1-PF_6707	135400	1	DTR	high	AAI-based completeness > 90%	141	2	0	0.312057	GACAGAGCCAGCCGGAAACCGCGAGGACATCCGAAGAGGGAGAAGAGAAGCACGAAGGGAGAAAGGGCGAAAAGATGAGGACTTGCGCCCGCTTGCCTGCCGTTTTGCCGTCAAAGTCATATATAGACCGAACCCCGCCCC
s18v1-PF_10067	82025	1	DTR	high	AAI-based completeness > 90%	141	2	0	0.276596	ACGTTCGAGACCTTGTTGGAAACGTATGGAAGTGGCTTGATGAGTTCATTCACGACCCTACCGGATCAGCATGGAACTGGTATGACGTTATGAGCGGTCAGAAAGTTGGCCAGCTTTACATGGCCAACAACACTGGCTTGC
s18v1-PF_11865	1478	1.1	DTR	not-determined	NA	119	2	0	0.310924	GTGTTGCCTCTATTCAACTCACAGAGGTGAACTGTCCTTTAGACAGAGCAGATGTGAAACCCTCTTTTTGTGATATTTGCAGGTGGAGATTTCAAGCGCTTTTAGGCCAAATGTAGAAA
s18v1-PF_12934	36625	1	DTR	high	AAI-based completeness > 90%	141	2	0	0.29078	TGCTGACGCAGACATTTACACGGTGAGCCGTGATAACCTTGTTTGGCTTCTGCAAATGTGGGGCGGGTCTAAAGTCCCTTATGATATGATGGTATTGGACGAGCTTAGCTCTTTCAAGAATCACCAATCAAAACGCTTTAA
s18v1-PF_24588	92048	1	DTR	high	AAI-based completeness > 90%	72	2	0	0.291667	GGGGGGGGTTGCACGCCCACTTGTCGCGTGTTTGTACCACTATTTGTATCATTACAAATATACAAAAAATCG
s18v1-PF_26258	178706	1	DTR	high	AAI-based completeness > 90%	141	2	0	0.312057	GAAGCGACGGTGAATGTATTCTGGTGCTAATGTAAACAATGGAAGCTGAGAGTTAATACATCCAACTTCATAACCACTGTTAGCCCATACTTTAGTTCCATATACCATTACTTCTGACATCAGTTCAACTTTACAGTCGTA
s18v1-PF_33464	39882	1	DTR	high	AAI-based completeness > 90%	141	2	0	0.312057	CCGACGAATCGGCTGGTATATCCGGTACCGTTCAACACCATTTTCCCGTCTGCGGTGCCGTAAAGGTAGAAACTGATTGCACCGCTGTTGTCGGTGCCGCGCATGACCGCGCGGGAATCGCCGGACGGTCTGAAACCCTCC
s18v1-PF_38518	45432	1	DTR	high	AAI-based completeness > 90%	66	2	0	0.287879	AATCGACCATTTCAGATAACCGGCACTAGTGCATTGGGACATTTGACCCTAATCGTCTCCCTGTCG
s18v1-PF_47351	18118	1	ITR	not-determined	NA	1000	1	0	0.284	CTACAACGGCGTTAACCGCTTCGTTGAAGGATGCATATATCTCGATGCCTACCCCACGTGCAACTGGGTGTACCAGGCGTTCGCGAACGCAGTAGGCCAGTCGCAGGTGGACATGATGGGATGGAAGTTCAATTCCATGACCGAATTGCCGTTCGTGAACAATGCGGTGGATTCTGCCCAATCCATCGTAGGAAACGCCATGTCGCTGAACCTTCCGGGTATGCTGTCAAGCTCGGTGGACGCCGTGCAAGACCAGACGAACGCCTTCTCCGCGCTCTCGAAAGCATCGCGCCAACCTAACACCGCGCGAGGAGGTACCAACTCGACGGCTGCGCTCGTGAACATCGGGAGTTACACGATGGGCATACGCAAGTACACGGCCCGTGCCGAGATAGCGCG…
s18v1-PF_66976	1344	1.1	DTR	not-determined	NA	121	2	0	0.330579	TAGCTCAGGATTTTACCCATGAGCCAGCTTGCCAGACGGGAGAACGCGCCCCACAGGGCCGCTTTCGTCACCAGCCTGAGCAGATGGTACATCCGCCGTTTGCTTGGCAACTTGCCTCCTT
s18v1-PF_72285	78884	1	ITR	low	AAI-based completeness < 80%	1000	1	0	0.357	GTTCCTTTAAATCAAGATGGTAAGAAAGAATTATCCTTTAAATATAAAGCATCTTGTGGTACAACATTCTCTAAATCGATACAATCATTAAATGTAACTCTTACACTTAATATTGATACTTCTAAAAGTTTTGTATTTACTTTGGGTGGTGGATTAAATTTCGGATCAACTAGAGAAGGGACATTTTATTATCCACAAGCAGGAAACTATAGTATTAGTAATTTAGTATGTCTTCCAGAAGGTATATCTCCTACCCTAACATATCATTTAATGGATCTACAACTTCAGTAACAATAATACCTACTAATATAGTAAATATAAAAATTTATTAAAATAATTCATTTCGTTTTTAAGCTGGACCTATTGTGGCAGATATATCAGTTGTATATCCTTTTCTTA…
s18v1-PF_78669	16276	1	ITR	medium	AAI-based completeness > 80%	38	1	0	0.394737	TTTGCCCCTTTAACATCAAACCCGGTACTCCATTTCCC
s18v1-PF_87461	4858	1	DTR	not-determined	NA	119	2	0	0.344538	TGCAACATTGCCTTTAGCTAAAACTGCCTGAAAACCGACTGCTTGACAAATAATAGCAACTACCAAAAGTGCCGGTAAAACTACTTTAAGAAACTTATTCTTCGATACTTTTCCTTTCA
s18v1-PF_93409	16990	1	ITR	low	AAI-based completeness < 80%	112	1	0	0.410714	GGGATGTTATAGAGAAGCCTGTATAAACCCCTCTGTACTCCCCCCTTTACACGCCCAGCCTACACGCACCGATACACCCCTCGCCTATCCACACCCATACGGGCCTCACCAA
s18v1-PF_99877	81999	1	DTR	high	AAI-based completeness > 90%	141	2	0	0.333333	AAGTTAATGATTCATTTACTCAAAGTAGAAGTATAGTAGTAGGGTATGCTGCTACTCATGAGGGTTCAAGAATAGATCATGATTATACAGTTACTCTATCCCCAGCTCAGAAATCTGGTATCACAATCTCATTGTATGTAA
s18v1-PF_100286	78898	1	DTR	high	AAI-based completeness > 90%	141	2	0	0.390071	CTTTAAGTATTCTAAAGAAGTTGACTATCCAACAGAATACAAAGAAGTGATATGTGATAACAAAGAAGCTTGGAAGTTTTCTCTTGATCGTACAAGATACAATCTGAAGAGAAAAAGATTGCCAGCTCTTATTGTATGTAA
s18v1-PF_100357	53491	1	DTR	high	AAI-based completeness > 90%	141	2	0	0.411348	GTAATCGTCATTGCATAATTTTTGATTACAGACAATTTCTTCAATGGTGCATTATCGAAGTTTGTTGGATCAATCTTTTCAAGCATTGAAGGTGCTTTGATTGTGTATATATCAGAAACATCTTTATCGTCTTGTATGTAA
s18v1-PF_100379	64507	1	DTR	high	AAI-based completeness > 90%	141	2	0	0.347518	TATTATTGGTGGCAATATCAGTGTACTCATTCAGGTACATCTGATTATTCGAGACTTTCCGGCTGGAGAAAATATTGGTATCAAAAGCATTGAAGATAGTCTTCTTCACGTTTCCGATATGCAAGCGGTTGTTGTATGTAA
s18v1-PF_100383	39182	1	DTR	not-determined	NA	141	2	0	0.35461	CCGCTAAAAAGACCGCCTAAAAGAATTTCAGCGGTGAAAACTCTGTTTACCCATACATTTATTAATACGCCGACAATTCCCATGACAAGCGGAATAAAGCGGTTAATATTGTCATTAGGTACAATGTTTTTAATTATGTAA
s18v1-PF_100384	36966	1	DTR	high	AAI-based completeness > 90%	141	2	0	0.304965	ATACATAATGGCATATGCAGGCAAATGCGATAGATGCGGTGGGTCCTATGACCTGCCGTTTGAACACGGAGCGCCGATAAGGGCAAGGATGGTTGATGTGTTCGATGATCCAGTAGAGACAAAGGATCTATGCCCAGACTG
s18v1-PF_100385	49805	1	DTR	high	AAI-based completeness > 90%	141	2	0	0.35461	TGTTTCAAATTCCTTTCTTCGTTCATTGAATCAGGAAGCCATTCGGGAAAGTCATAAATTGACATCTGGCCGTCACATTCGTAATTGTCCAGGATCCCCGAAGACTCCGATTTTCCTTTCTTTTCTCCGTCCATTATGTAA
s18v1-PF_100387	32967	1	DTR	high	AAI-based completeness > 90%	141	2	0	0.297872	CTACATAATCGAGCAGCTGCTCTTCCGTCTTCGAATGGTCAATCATGACTTGCTCGACATAATTCAAGTTGAGCCAAAGGGAGCGATCGCTCTCGAACTCTACGCCCTTGTCCATCAGCCATTCGAAGATTTCCTCAACGC
s18v1-PF_100388	97817	1	DTR	high	AAI-based completeness > 90%	141	2	0	0.283688	AAGCGGTCGTGGTCGACGCTTTCGCTGAGTCCGGAGAAATATTGGTTGATGGACGAATAGTCGTTATCAAAGAAGTCCTGATAACGTTCCAGAAAATCCGTCAAGCGGTATTTCGTGACGTTAGAAAAGCGGATTATGTAT
s18v2_3517	35682	1	DTR	high	AAI-based completeness > 90%	141	2	0	0.29078	TCGACATCCAGTTCGTCAACGGCCTTATCTTGGGAAAGGGGCTCGGCGGCTCGGCGACGACTGGTGTCGGCGACTACTTCTACTTCGACACATCCGGCGGTAAGGTCAAAGGCACAATCCGTCTGGTTCAGTTCCTCGGCA
s18v2_3747	39182	1	DTR	not-determined	NA	141	2	0	0.368794	AATGAGAAAGACAGCAATAATAATACTCCTTATGCTGTGGTCGGTAGTAGCATATGCGGTTGGTTACGGCATCGGGAGTGCGATACAAATGATAATGGGATAGGAGGAAAAACAATGACAGCTTATGAAGCAATGTTAAAA
s18v2_4389	1935	1.1	DTR	not-determined	NA	141	2	0	0.411348	CAAAAGCAATGGTCTCGAATTGAATTTATAGATATAGAATGGAATCCAATGGAATGCAACTGTATGGAATGGAATAGAATGGAATGGAATCAAATGGAATGGACCAGAATGCAGTGGACTGGAATAAAACGGACTCAATAG
s18v2_7605	47583	1	DTR	high	AAI-based completeness > 90%	141	2	0	0.411348	TACTATACACAATCAATTGATTATATGCAACTATTGAATAAAAAAATATACCTCCAATTTTAGGAAGTACATTTTCAAGTCAATAAAATTTTACAAAATCTTAGAGTTTAAAGTGTTATACCCCATTTAAATTTTATTTGA
s18v2_8528	97817	1	DTR	high	AAI-based completeness > 90%	141	2	0	0.269504	CCGAAATCCTTCAAACATGTCTTGAGTTTCATGCGGGTGTACGTACCAACAGAGCACACATGATTGACGCCATAGCGTTTGGACATGTATTCCTTCACTGTATCCCGAAATGCAACAGGGAAATCGGCGTCCACGTCCGGA
s18v2_10292	1426	1.1	DTR	not-determined	NA	141	2	0	0.375887	CGAAAGGGATCATTATTGAATGGAATTGAATGGAATCATCGAATGGTCTCGATTGGAATCATTATCAAATGGAATCGAATGGAATCACCGAATAGAATCGAATGGAACAATCATCGAATGGACTCAAATGGAATTATCCTC
s18v2_10991	46272	1	DTR	high	AAI-based completeness > 90%	141	2	0	0.297872	CTGCACGCTCTCATTCTGCGTGTTGAACTCATTGATGACGGAAGTGCCGTCCGCATAGGCTTGTGTCGCCAAGTCCTGTGCGGTCTTGATGTCATCGAGCTTGTCAGCCAAGACGGTGAGCACGCCAGTGGCACGTGAGCC
s18v2_12164	54915	1	Provirus	low	AAI-based completeness < 80%	NA	NA	NA	NA	NA
s18v2_16214	1503	1.1	DTR	not-determined	NA	141	2	0	0.276596	ATCAACGTCTGAGTCAGTGTCAACATCCGAGTCAGTATCAACATCCGAATCAGCTTCTGCGTCTGAGTCAGCGTCAACTTCTGAATCAGTGTCTACATCTGAATCAGTATCAACGTCTGAATCGTTGAGCACCTCAGTATC
s18v2_28804	64621	1	DTR	high	AAI-based completeness > 90%	93	3	0	0.333333	AATCTGAGCATAGTCACCGCTTGAACCAATCTTAGCATAGTAACCGCTTGAACCAATCTGAGCAGAGTAACCGCTTGAACCAATCTGAGCATA
s18v2_40906	53729	1	DTR	high	AAI-based completeness > 90%	141	2	0	0.29078	CTCCAGAACGTAGATATCAACCTCATCACCACGAAGGGAGCGCAGCACATGAGTTACGTACCGCTTAAGGCGCATACAGGCGTGAGCTACGGAGATAACTATTGGTACAACGCAGAAGGACAGCTGTGGCTTGGTGGCGGC
s18v2_44015	63313	1	DTR	high	AAI-based completeness > 90%	141	2	0	0.319149	TCCGCTTGATACAGCCAAGGAACTGAGTGTTATCAATAAGTTGAAGGAGTGGCTGAAGAAGTTCTGGTATTGGACTCTTGATACATTTACGAAGTGGAAGCCTGAGGACATTAAGAAAATGACCTTGGAGGATATTCGTAA
s18v2_54373	3715	1	DTR	not-determined	NA	141	2	0	0.347518	ATTCCATTCCACTCGAATCCATTCCATTAGAGGACATTCCATTCCAATGCATTCCATTCCATTCCATAGCATTCCATTGCATTCGATTCCATTCCATTTGATGCCATTCCATTTGATGCCATTCCATGACATTCCATTCCA
s18v2_56554	1331	1.15	DTR	not-determined	NA	141	2	0	0.333333	CAAATTGCTGCATCAAAAGAAAGGTTCAACTCTGTTAGTTGAGGACACACATCACAAAGAAGTTTGTGAGAATGCTTCTGTCTAGATTTTGTATGACGATATTCCCTTTTCCAACGATATCGTTAAAGCAATCTAAATATC
s18v2_57092	189550	1	DTR	high	AAI-based completeness > 90%	141	2	0	0.326241	AACACATTGTACTATTAGTGATTGTTCTCCTGTTCCGGTACATCATTACATATTACATGAGATAATGACCGATTGGGAACTACCCAATCAAATGTTACAGTATGAAATCGACCCGGATACAATTTGTCAATATGTTGGATT
s18v2_57812	53491	1	DTR	high	AAI-based completeness > 90%	141	2	0	0.340426	CCGCCAATAGCTCTTGTTGGGTCTGGATAATTCAATGTCTGTAATGCTTTCTTCCATGCATCTACACATTGATATGGTTGCTCAGGCGGTACACCATCCATGTCGATAGATTGACCATTCCATGTGTTGATAAAATTCTGA
s18v2_58855	96840	1	DTR	medium	AAI-based completeness > 80%	139	2	0	0.374101	CCACCACGATTTGTTTTCCAATCACCTACAACAGCACAATTAGTATCTTCATTAACTAGAAGAATATCAATAGTTCCACTAATTAACCAATCTATAAGAAACATACCAATTTCACTATAAATCTTATATCCTCTTTCAG
s18v2_61128	45428	1	DTR	high	AAI-based completeness > 90%	141	2	0	0.35461	ATGGAAACGGTTATATTTCCGCTTTCTGTTATTCAGAAGATTTTGATTGGTTGTTCTTACCGGGTGAGTTCAACGGAAACACCGCCCTTCCTGTTGGTGATTATTGTTGGAATCAGAACGGTACTGGTTGGCGTGTCGCTA
s18v2_83002	1855	1.1	DTR	not-determined	NA	124	2	0	0.5	GAATGATAGTCAAAATACAAGTCATAGACCATCTAAAATATATGTTACATTATATGCAAATTCTAATATAGCAACAGATATAAATGGAAACAAATTAGAAAATGTAGAAATAAATACTTCAAAT
s18v2_87304	81999	1	DTR	high	AAI-based completeness > 90%	141	2	0	0.368794	AAATTCCCATCAGAAGCTATTATAGCTATTAATCTGGTATATCTATCATCTATATAGTTTCCCTTATATAACCCAGCACTTGGAGAATACCCCTTTAACCCATTAACTTCTCCAACAGTTATTTCATTATATGGTCTATAT
s18v2_89968	61554	1	DTR	high	AAI-based completeness > 90%	134	2	0	0.343284	AATAATGGCATAGAAAAGACCCCTGTTATGGGGTCTCTTCTTTTGTGCAGTCCTCTAAGTCTTTCTGAAGAATTTTAGATGCAAGGTCTGAAAGCTGTGGGAAGTAGGTGATTACTTCGGAATTTCTACATTTC
s18v2_96060	8439	1	DTR	low	HMM-based completeness (upper-bound) < 80%	104	2	0	0.269231	CATGCGTATCAGATAGGCCAGCTGGCCGCGTTGTTTCTTCTTCAACTGACGATACAAATAGCGATAAGCGTTATGGTACACACGGATGAACGAGCGGTCATCAC
s18v2_100433	8563	1	DTR	low	HMM-based completeness (upper-bound) < 80%	141	2	0	0.319149	AGCTGTGCGGTACTCATGCCCTTTATCTGTGTTAATTATATCATGTTGTTTGCTCTGCCGTCAAGCGCCGTCCCCATCATCGGGGACGGGCGGCTTGCTGGTGATGTAGATGTGCTTGATCGGCGGGTGCTCCTGCCGTTC
s18v2_101295	36966	1	DTR	high	AAI-based completeness > 90%	141	2	0	0.439716	TCGTTGATTTGAGCTTTGAACACATTAAACGGCTGCATGTATTCTTTCTCTTTTCTTATTCTCTCGTCATTGAGGGCTTTCTTTAACTTGTTAAGGTTAGCCTTATCTGCCTTTGCGTCCTTGATCTGATCATCTGTGTAA
s18v2_101663	47040	1	DTR	high	AAI-based completeness > 90%	141	2	0	0.319149	ACAAGTACCATTATGAAATCAAATTCCTTCCTGAATACGGTGTCAAAGTTACTCACAAGGATTAAGGAGAAATTACTATGGGAGCATTACTCGGATTTGTCGGAGGTTTTATTACAGGTCAGATTTTCCTGATCTGTGTAG
s18v2_102194	99153	1	DTR	high	AAI-based completeness > 90%	141	2	0	0.375887	CTAAACTATTCGTATAATCATTCCATTGTACTAACTTCGTTCATATACGATTGATATCTTGGATTAGCCTTATTTTCCAAATACAACTCTACCGCTAACTTAACTATCTCATTGTGAGTTGCAACTGGCATATCTGTGTAC
s18v2_102325	34033	1	DTR	high	AAI-based completeness > 90%	141	2	0	0.404255	ATACACAGAATCCCAGTGGTAATTTTAAGCAATTCCTCATTTTAGAAATGAACAGAATGTACTACTGCAAAACACAGTACCCATCCCCTAAAATCCTAAGAATACTGTACAAAAATCCCCACAGGATACACATTCACATCA
s18v2_102526	3583	1	DTR	not-determined	NA	141	2	0	0.304965	ATGGTGGCCACAGGCTAGCAGGCTCCGACCCCTGCTAACGCCGACACGAGGTAGCAGCTCGCATCAACACCACCTGCAATTATACGTGCAACACGTGTCAGATGGCAGGAAGTCGAGACGTTACCTCCCAAAAAACGGGAG
s18v2-PF_10751	31632	1	DTR	high	AAI-based completeness > 90%	141	2	0	0.297872	AACTGGACAGATGACCATTTTGCCCACCCGGGTCGTCTGTCTAATAGGCGACATCAAACCTTAAAATAATTAACTAATGATATACACTCACTTGGTGTCGCCTTGCCCCCAGTTCTGCGGTTGAGGAAAAGGAACGAAATG
s18v2-PF_13242	40089	1	DTR	high	AAI-based completeness > 90%	141	2	0	0.375887	ATGGGTGGGCGGGCATGAGGTCACAGTGCCGCCTAAGACCGAATTGAGCCGCCGCACGCTCCCATTGCCGCGCTTCGCCGTCAAACGCCTGCGCGAACTCAAGCCACGCGAGGGAGGCCGACTCATCGGCACCCTCACCCC
s18v2-PF_25515	67525	1	Provirus	high	AAI-based completeness > 90%	NA	NA	NA	NA	NA
s18v2-PF_52484	1863	1.1	DTR	not-determined	NA	141	2	0	0.411348	GAATGGAATAATCATTGAACGGAATCGAATGGAATCATCATCGGATGGAAACGAATGGAATCATCATCGAATGGAAATGAAAGGAGTCATCATCTAATGGAATTGCATGGAATCATCATAAAATGGAATCGAATGGAATCA
s18v2-PF_64124	1505	1.1	DTR	not-determined	NA	141	2	0	0.319149	CACTCTTTTTGTAGTATGTGCAAGTGGATATTTGGAGCGCTCTGAGGCCTACGGTGAAAAAGCAAATATCTTCCCATAACCACTAGACAGAAACATTCTCAGAAACTCCTTTATGACGTATGCACTCACCTAACAGAGAAG
s18v2-PF_66996	47583	1	DTR	high	AAI-based completeness > 90%	141	2	0	0.425532	AAGCCTTAATGCAACTGAAAGCTATAAAAGGGCTTACAATGTAGTTAATCAAAGTACAGCAGAAGCAAATGGAAGCCGACTGCTTAGAAATGCCAAGGTTAAAAACTACATAGATGAAGTTATGAGTGCTAAAGATGAAAG
s18v2-PF_71816	36966	1	DTR	high	AAI-based completeness > 90%	141	2	0	0.404255	TTAGGGGCAATTTAGGGGCAAAAAATTGATTTGTCATGATATTTTATTACACGAAGTATCTTCAAAAAGTAACGTATTTAAGCCATTTTGAGATATTTTGACATATCAATATATTAATTATAAAATAAACAATATGTATAA
s18v2-PF_75219	63369	1	DTR	high	AAI-based completeness > 90%	141	2	0	0.319149	ACGAGACAGTCGGATTGGATTATCTGCCTTCCGGTAGGTTGCAAGTCAATCCTGATGTTTCTGGTGACTACAGGATTGCAGTTAAGGCCACTGGTTCCGGGAATGTGGCGTGCAGGTTTAAGAGAAGCTGGTGGTGATTTC
s18v2-PF_83119	45308	1	DTR	high	AAI-based completeness > 90%	141	2	0	0.361702	GATTGGTTCAGCCTGTCCGCTTTCTTCAAATAGTGCGGTACACTGTGCTTTCTTGCCCTACCGTTCCTGTTTTCTTCAACTACTTTGACGGGTCATGTTTATTCTTCACACGCTCTATCTGCTATCCGGCAGCCTGACCAC
s18v2-PF_90312	41449	1	DTR	high	AAI-based completeness > 90%	27	6	0	0.444444	TCGCCTGCCTTGATGCCACAGCCTGCC
s18v2-PF_111701	106933	1	ITR	medium	AAI-based completeness > 80%	141	1	0	0.319149	TTGGTAATACGTTTGCTGTTGAATTAGGGTGGATAAATAATCAGAGAAATGGGGAGCATGTAAGGCTGAGAGGTTGGGGTCTTAGTAGCTATTCCTCTCCTACATATTATAATTTTATATGGCTGGGGAAAGTGGGGGTAA
s18v2-PF_112320	32967	1	DTR	high	AAI-based completeness > 90%	141	2	0	0.333333	GTAATGGGTTTCAACAAGGAGGTGTTTGCGGCGAACTTGCGAGCAGCTCGCGCGAAGCTCGATATCTCGCAGGATGAGTTCGCAAAGCGCGTCGGTATCTCCAAAGATTCCGTCGTGAAGTACGAGAGCGGTGAGGGCTAC
s18v2-PF_112561	63313	1	DTR	high	AAI-based completeness > 90%	141	2	0	0.35461	GAGTGATTACAAGGCTTTCACCCAGAAGGAGGCTCTGGACATGGTGCAGGGTTATCTGAACGGTGATGAAGACTTGAAGGAAATGGAGAAGGCTGAAAGCAAGTACCTGATGAAGGCTAAGGCAGAGGACGTGACGGAGGA
s18v2-PF_115152	53491	1	DTR	high	AAI-based completeness > 90%	141	2	0	0.340426	AAATCAAACACATCTTATGAGTATTCAAAACGTATGTGTTTGCCTAGTGGCCTAGTAAAAATCTTCCTTATGAACAAAGTTGAGGAAGTATCGTATGAAGATGGTGTATTCCTAAAAGGCTTTAAATACGTCTACGGAGGC
s18v2-PF_116224	61561	1	DTR	high	AAI-based completeness > 90%	141	2	0	0.326241	GGCGGTGCACATTTGGTTATGGCAAGCGCAAGCCATAAAAGGTTTTACTGTGCGATTCCCATGCATAGCTTCAGTGGAAGAGCGGCATCCGCATAGGATGTGTGTCGGCGGTTCGATTCCGTCTGCATGGGTTACGGAGGA
s18v2-PF_117851	81999	1	DTR	high	AAI-based completeness > 90%	141	2	0	0.439716	AAAACAAAACTCAATTATGGCAACGAAGAAAGCTGCAAAGAAAGCAGAACCTGCTGCAAAAGGTGATGCTAAAAAGATGGATGAAAAAAAGAAAGCTCGTTTAGAAGCCCGTAAGGAAGCTATCAAGAATCGCCCGGAGGG
s18v2-PF_118462	3583	1	DTR	not-determined	NA	141	2	0	0.347518	AGCCGCCCAGATTCATCTGGACGAGGGCACCCCGCACGCGCATATCTGGATTGCCCCAGTCATCCGCGGCGAGGACGGTCACGATCGCCTGTGCGCCAAGGAGCTGTTCGCCCCAGACAAGCGCCGCAAGAACGCGGAGGG
s18v2-PF_119228	99153	1	DTR	high	AAI-based completeness > 90%	141	2	0	0.35461	ACCTCCGACTCCAATAGTTACTTCCATTCCACCAAATATAAAAGTATTAATATAACCTTTTCTACCTGGAGACACATTGTGTTGATTTTTCATATCTTGCAATGCTTTCTGAAGTACTGGAGTATTAAACTTTATAAAAGG
s18v2-PF_119244	3198	1	DTR	not-determined	NA	141	2	0	0.326241	ACCTCCCTTTTCACAGAGCAGTTTGGAAACACTGTTTTTGTAGGATTTCCAAGGGGATATTTATAGCGCATTGAGCCTACGGCAGAAAAAGAAACATCTTCCTATAAAAACTAGACAGAATAATTCTCAGAATCTGCTTTG
s18v2-PF_119885	1500	1.1	DTR	not-determined	NA	141	2	0	0.35461	GAATACACACAGCACAAAGAAGTTACTGAGACTTCTCCTATCAAACATTATATGAAGAAATCCCGTTTCCAACGAAGGCCTCAAAGAGGTCCAAATATCTGCTTGCAGACTTTACAGACAGAGTGTTTCCAAACTGCTCCA
s18v3_2441	100970	1	DTR	high	AAI-based completeness > 90%	141	2	0	0.368794	ATAATTATTCACATTCTTTTCTACGTTTCTTACCCAATTCCGCTAATGCAGACATATCTTCAAAACTTTCATTCTGTGCTGTATCAGATACAGTTTCTATATCAGGAGCAGATTGGGCTTCAAATACTTCAGTCAATTGAC
s18v3_4838	99642	1	DTR	high	AAI-based completeness > 90%	141	2	0	0.368794	AAGCTTACCAGTCATTGCTTTATCGGAAAGCTCAAAATTCAAAGCGGTTATGATTCTATTATGAAGATCAGGGTTGCCTTTAACTAGTTTGTTATAATAATCTCTACATTTCTTAACATTACTTCTAAGAAAGCCTTTAGT
s18v3_5021	15316	1	ITR	low	AAI-based completeness < 80%	20	1	0	0.45	GGGAATTAGGACACAAAATT
s18v3_9193	9101	1	DTR	low	AAI-based completeness < 80%	141	2	0	0.319149	AGGATTTCTCCTGTAAGTACCCATCGCCAATGCTATTTTGAGGTTTTATATAATGGCAACACTGTTTCGTCAAATACACTACTCCTGTTTAATCACCATCCTTAGAGCTACAGACTTGGGCAAACATCCGTAGGTAACTAT
s18v3_9444	57304	1	DTR	high	AAI-based completeness > 90%	141	2	0	0.304965	AAGCAGCGTACTTGTTTCCATCGTAACCTCTTTAGGTCGTACAAAGACGGTAAACGGAACACCACCCAAAGCAAAACCATTGGAAAGGTCTGTAACCTTACCTTTGGAAAGAATCCGTAGGCTGTACATCGTTGTTTCCAT
s18v3_10506	50427	1	DTR	high	AAI-based completeness > 90%	141	2	0	0.411348	ATATGGTTTCTACGTTGAATGGAATTGTATCTTCCTTTTTCTTTCAAATCATAGACACTATCAGCTAATATATTTATCGCCTTACTAATATCCATAACTAACCACTCTTTCCGTCTCTATCTGTTCTCAAGAATTTCTCTA
s18v3_13627	16749	1	ITR	low	AAI-based completeness < 80%	141	1	0	0.397163	ACCCCACACCAGTCCACACTGATACGGGCCTCACCAAACCACACCCATACACCCCTCACCAGTCCGCACCTATACGGGCCTCACCAACTCTCAACGAGACACACCGAGCCTAGTAGATCGGGAAGAGGGAAGGCTGACCAA
s18v3_22219	84867	1	DTR	high	AAI-based completeness > 90%	141	2	0	0.347518	ACATTAGCTAGAATACAGAAAATAGGTAAGAGTTTAACTCCCGACTTTAGCATCTATGTGGATATGCCTAAAGCATTACAGATATTTAATGTGTATCGTAATCGTTGGCTAGGTAAATTTTGGCAAGATAATGGCGTAATA
s18v3_23104	2522	1	DTR	not-determined	NA	78	2	0	0.333333	AAACATTATTGGCAACTTAGATGGTGATTATAACGTGCTTATCTGTCCAACGGATGGAGATGGTTCTAATGATACTAT
s18v3_23657	2096	1.1	DTR	not-determined	NA	128	2	0	0.320312	AAAGCATGAGGGAAGCAAAAGTGGAATATGACGATATAGCGGATATGCACTGGTGGATGGTGGATCATATTCACTATCTGCCAGCCATGATATATGCTGTATTGTTGATAGATATAGTATCAATCGTT
s18v3_31682	37597	1	DTR	high	AAI-based completeness > 90%	141	2	0	0.269504	ATTGGTCAGCAGTTTGGAAAAGAGCAGGCGGAACAGTTCCGACGTCTCTGCTCTGTCAAAAATAGGCATACCCTCGGAGTCCACGCCGGTGATCTCCGAGTCAAAATAGCCGTATCTCATGGCCATGTTAAAATACCTCCC
s18v3_31825	98149	1	DTR	high	AAI-based completeness > 90%	141	2	0	0.333333	AAAGTAGATGAAGGAGAATGGGGAGATCCTAACAGATTTCGTGGCGCTTCAGTAGAAGGTTCAGATGGTCAATACACAGTATTCTGTTATACTAATTCTAGTGTACAACCACCTAAACCTACTAGTTCACAAATACCTCCT
s18v3_31973	118464	1	DTR	high	AAI-based completeness > 90%	141	2	0	0.375887	AGGAGGTATTTAATATGTGGATTGTATATCTCATTTTAATCCCCATAGCAATCATTGCTTTCGCAGGAATTACATATAATCTTTCAGCACCGAAAGATGTATCCAAGAAAACAAAGGCGAAACCTACCAAAACAGATATAT
s18v3_31978	56513	1	DTR	high	AAI-based completeness > 90%	141	2	0	0.35461	CGGAGGTATTCAATATGGCAGACATTAAAAATGACAACTACATAGCAATTCAAGGGTTTATGGTAAAGGAATTAGGACTTACAGGAAACGAACTAATTGCTTATGCTTTGGTATATGGCTTTTCGCAAGATGGTGAAAGCA
s18v3_31979	42371	1	DTR	high	AAI-based completeness > 90%	141	2	0	0.312057	CGGAGGTATGCAAACACGCGGAAGAAGCTCCCGAAATTCCGCAGTTGAGCACGGAAGAGCTGGTCAAGTCGCTGAGGCTCTGCGATAGCGCGAATTGCGTCGGTTGCACACTTTATGGGTTTTACGACTGCGGCAGCATCA
s18v3_31981	91583	1	DTR	high	AAI-based completeness > 90%	141	2	0	0.390071	TCTATTGGACATTACATAATTCTGATTATTATGTAGTCCTCCATAAGTAGGATTTAAATTTACCATTGCAAATTTTGCAGTAGTATTATGATAATAGGCATTACTTATGTAGGTATGGTAAACCCTTTGTATATACCTCCA
s18v3_31982	33157	1	DTR	high	AAI-based completeness > 90%	141	2	0	0.319149	AGGAGGTACGCGCAACACGACACTGCGGCGAATATCCTGCACGACCTGAACAACATGGCGATACCCACAGTGACTGGGGCGAAGTGGACGGCATACGCGATTCGTGAGGTCATAAAGAACCAGACGTACATCGGAAAGATA
s18v3_31984	2474	1.1	DTR	not-determined	NA	141	2	0	0.368794	ACTATAATAACGTAACCTTATATTACAGCTTAATAATCCCAAGATACCGTAGTATACAACAAACCCATTCCGAACCGTTCCTAGCCGTTCACACTATAGCATATTTAGATCATCAGGCGAAATGAAGTTAAAAACCCTCCC
s18v3_31985	10618	1	DTR	low	HMM-based completeness (upper-bound) < 80%	141	2	0	0.475177	AGGAGGGTTGAACAAATGAAGGAATTGAAAGAATTATTACAATGTGAAGAGTGTAAAAATTGGTTAGAAATTGAAAAATTATTAAGCGTTAATGATGTATATGAAGAGAACAAATATACTATAGCAAATATAACATTAGAA
s18v3-PF_2491	99642	1	DTR	high	AAI-based completeness > 90%	141	2	0	0.361702	CATAGACGAATATCAGTGAAATTTTGGAACTAACAGATACTTTCAGATAACTACAAAAATGTTTGTTGAACTTAGATCAGCCTTACCTCTAGGTAAAAGATAACAGGTGCTTTGAAGAGACCTTAGTAGTATTGTGCGAAC
s18v3-PF_47837	83818	1	DTR	high	AAI-based completeness > 90%	141	2	0	0.41844	AGGAACTGCTTGAACTAACGCTTCGTATCCTTTATGTAAACCAACTTTAAATAAACCTTTATATTGACCCTCTTTTACAATAGCTGTTCCATTTTTATTTATAGGTTTTTGAAGATTTACATTTGAAGGGTCTGTTGTTAT
s18v3-PF_48041	118464	1	DTR	high	AAI-based completeness > 90%	141	2	0	0.29078	CGGAACTGCTTCTGGAACTGTTTGTGAGGGTGACGATGAGAGATTGTCGAATGCGCGTCCTGCTTCAGATGTTTCAGCATGGGCAAAAGCGGCTACAAAGCCAACCTATACCCCAACAGAAGTTGGCGTCATTGGTGCAGC
s18v3-PF_48097	37597	1	DTR	high	AAI-based completeness > 90%	141	2	0	0.347518	CGATCTTCTCGATGGTCTTGTCTTCGGCGTCTTTGACGTAGGCGATCTTCTGGGCCCGGATGATGGCAGCGTAGGCCAGCTGGATCTGGGTCCAGAGAAGATCCAGAGGGGAGGAGCCCGCTGTCAGGTGCAGCAGTTCCA
s18v3-PF_48099	50427	1	DTR	high	AAI-based completeness > 90%	141	2	0	0.319149	TGGAACTGCGGAAGTATTTACTTACCACAATGCAAAAATCACTTCATTCCCAATGGGTATCCCTGATGATGGAGCGTTTGAATTTAGTTTAGCGTTCAAGAAAGATACTCGTGGAAACTGGTATGAAGTTTATGTAGTAAA
s18v3-PF_48101	56513	1	DTR	high	AAI-based completeness > 90%	141	2	0	0.326241	AGGAACTGATGAATCTTTTTACCACAGAAGAATATACATTTGCGGAACTTTTTGCTTATTGGCATCCGGAATACGCAAACACATCAATTCCGACAGACAAGAGCGCGGACGAATTTACGATCACGCTTGGAGATCCGGACA
s18v3-PF_48102	91583	1	DTR	high	AAI-based completeness > 90%	141	2	0	0.390071	TGGAACTGATATATTACTTACTCACGAAGCACCATACAATAGTTGTGGTAAAATAGACGACGAAAATAGATTCGGTAGTTTTATTTTATTAGACCAAGTAAGAACTAAAAGTCCTAAATATCATATATTCGGTCATATACA
s18v3-PF_48103	98149	1	DTR	high	AAI-based completeness > 90%	141	2	0	0.41844	AGGAACTGATAGATTTCTTAAAGACAGGGTCTTCTACTGATAAGAACAACGCAAAACGATTAGAAAATCTTAGAAACTCTGAAAATATAAATACAGCTAAAGATATTATATCTGGAGCGTTAGCAATATGGGGTGTACAAA
s18v3-PF_48104	100970	1	DTR	high	AAI-based completeness > 90%	141	2	0	0.397163	TGGAACTGAGTACAATAAAGTGTATGACAAGCTTACTAAAGAGTACGAAGATATAACTAGTTATGTTAACATGGTAGAGCCTGAGTTCGTAAAAGATCCAGATGCGTTTGCTAGAATAAAACCTGCTAAATCAGGCAAAAA
s18v3-PF_48105	33157	1	DTR	high	AAI-based completeness > 90%	141	2	0	0.304965	AGGAACTGAGAACCAGCGCTCACTGCGTTGCTCGCCATGCTCGACGCCCAGCTGGTGATGTTTGAGATGACGTTGCCAAGGAAGCCCGCGATGTTCGCAGGAAGGTTCTTGACGAAGTTCACGACGTTGCTGACGAACTGC
s18v3-PF_48106	84867	1	DTR	high	AAI-based completeness > 90%	141	2	0	0.404255	AGGAACTGACGAAATAACAGTTTGGCATGACAAAGATAATTTGGAAGAAGAAGCTAAAAGAGCATACAAACATCAATTATGGGTTGAAATACTAGATACTATCTGTTCAGCAGATGAATTTGGTAACAGAGCATGTGATTG
s18v3-PF_48108	2474	1.1	DTR	not-determined	NA	141	2	0	0.453901	AGGAACTCTTAAATTAATTATAATTTAAGATAGTTATATACTGTCCTACTACAAACCCCCATTTGCTTAGCTATATCAGTTACTTTAACACCCTCTTGTTTTAAACATTTTACCTTTTCTATCTTTTCTTGTTTTTTCTTA
s18v1-PF_34738	56756	1	DTR	high	AAI-based completeness > 90%	141	2	0	0.319149	ACCCATATTTTCGGTTTAGGAAACCGACGTTCTATCCGTTGAACTACAAGGGCTTATGCAGATTTGCACAAATTTTCAAAGAACTATTGCCTATCATTCAAAGGATAGATTGGGCTGAAAAATCGGTTACTCTTTAGGAAA
s18v1-PF_100394	40612	1	DTR	high	AAI-based completeness > 90%	141	2	0	0.283688	AGCCACCCGCGTACGAGTGCGGGCGCGGCTTTAGCCCGCACGCACGTGTCTACACTCAGCCCCTTGGGTTGTAGGGTGGTAACACTCTATTACGTAGTAATAGATTTACCACCCCATTTTTACTACCTAGTAAAACTGTAA
s18v1-PF_100381	40220	1	DTR	high	AAI-based completeness > 90%	141	2	0	0.411348	CGGTATTACCTGCCAGACGTAACCTTGCAGCTTCTTCAATGCGTGTGTCTTTTTCTTTCAAGGTGCTTTTGATCGCACTGGTGATCTGCTTTTTGGTACGTTCTCCATTATCATACAGTTTATAAAGTTCTTTGTATGTAG
s18v1-PF_100075	35920	1	DTR	high	AAI-based completeness > 90%	141	2	0	0.304965	TTACATACAATCATCTGGTCTCTCGCATTCACCCGCAGTCCCTGGATATGCTGGAATGCGAAAAATAAAAAACCACTATGCAATGCATGTTGATGTTATAGTATGCAGGTTGCCGTCTGTGTTATAGTATAAACTGCCAAA
s18v1-PF_100390	58446	1	DTR	high	AAI-based completeness > 90%	141	2	0	0.41844	TCCTTGAATTAAGGTTGCGTATCTTTGTAACGTCTTGATGATGCAAATATATAGTATTTTACTATAAAATCAAACATTTGTAGAGTAAAATGCTATATAAAAAGTTTTTTTAACTTTTTGGCGTTTATGGATATTATGTAA
s18v1-PF_100378	35362	1	DTR	high	AAI-based completeness > 90%	141	2	0	0.297872	ATACATACAAGAAACCTATGATCCTGATTTCAGTTTCGGAATCATGAGGACGCTTCTTTCCAGCGAATTCTACAAGGGCACCTATCGAGGATTTCCTTACTGTCCTGCATATCTTACTGAAGATGAGTGGAACAAATTGCA
s18v1-PF_68534	37945	1	DTR	high	AAI-based completeness > 90%	141	2	0	0.319149	AGCGCAACCGAGATAGGGGTCGCTATGACCGATAAGCTGAAGCCGTGCCCGTTCTGCGGCTCGAAGAGCGTGCGGATTTTCCGCACGGAGTTTATGAAGAAAAACGGGTCCTACCGCACGCGGTACAACGCCCACTGTGGG
s18v1-PF_100392	83598	1	DTR	high	AAI-based completeness > 90%	141	2	0	0.304965	ATACATAAAGGATGTCTCCATTTTACCATAGTCCTCGCCAAATTTACAAGGCGTTTTATGAGGAGAGAGCGCTCTTTACCTCAATATCAGCCGGAGCCGCAAGGCCCGGACGACTTAGGAGGTAATGCAAATGCGTAAGAA
s18v1-PF_99556	43488	1	DTR	high	AAI-based completeness > 90%	141	2	0	0.361702	GCATCTATAAGAGAAAGAGGCAGGGCGAAAGCCCTGCTTCTCTTTTTGCCGTGAGGGAGAACCTCTTTCTTTTCTTTTATATTTCTTTTCTTTCGGGAGAGGGTGCTATACGCAGGATATATCTATGTTGTGTGTATGTAA
s18v1-PF_100382	63695	1	DTR	high	AAI-based completeness > 90%	141	2	0	0.382979	CTCCAATGCGTGAAATTATTGGAGAGGGGAGAATTGTTAGTGATTCATGTTGCTTCATTTTAACTACCACAAAAATGATTATGTAAATGTTCGTGGGGATATTTATTATGCAAATTGTATGCAAATTATTTTTGTATGTAA
s18v1-PF_4689	40390	1	DTR	high	AAI-based completeness > 90%	141	2	0	0.304965	GCCGGCAACGAGCAAAACGCGATCAGAGTTGTAGTTTAAGTACCCATAGTCTCTTCCATACATCGCGTCTGCTGACGTTCCTGCAATTGTTTTCGGCAGAACACCGTTCATGGCCCACCCGCTTCCCGACGTATCGCTGTA
s18v1-PF_22037	39708	1	DTR	high	AAI-based completeness > 90%	119	2	0	0.428571	ATCGGAAGAGTTGCGAGAGAAAACGGAATCTGCAGAATAAAAAGAAACATTGAGAAAGTGAAAGATAATTATCCACAAGAACTGCTGGATGAATGGGATAGAGTAAGACTTGAGATCTT
s18v1-PF_66841	32785	1	DTR	high	AAI-based completeness > 90%	141	2	0	0.425532	AGGAAAGGATTTGCGGGATAACTACCCGCCTCCTTATTTAATATAATATAGCACATTTTAGAAGTAATAACAAGCCTAAGCTATAAAAAATACTTAGAAAAGGGATGAGAGGATGACAATAGGTGAAAGAATTGCACAAGA
s18v1-PF_82632	56700	1	DTR	high	AAI-based completeness > 90%	141	2	0	0.368794	GGTAATGAGAAATTAAAAGTAGAATACCTCTTAGAGCACTTAGAGCAGGTGCAGATATTCCCAGATAAGGTTATAGTTATAGTGCCGATATTGAGCGAGGGGATAGTAGTAGAGAAAACTCAGTATGTATCTAGGGAGAAA
s18v1-PF_91054	68139	1	Provirus	high	AAI-based completeness > 90%	NA	NA	NA	NA	NA
s18v1-PF_47375	21796	1	ITR	low	AAI-based completeness < 80%	1000	1	0	0.352	TTATGCTCAGGCTGGAGACGGAAAGCCAGCAGGAAGAAATGCTGGGCTACATGGTAGATCACAGGGACGCAACACCGGAAAGCCTGCTGGAGATGGCAAGGGCAAGCCGTCCGGCGTAAGGGAAAAGTTCTCCCTGCGGGATTATGGGTTGACGGAGGACGAGGAACATGCTATCGTCAGTTATAAGTCGGGCGACAGCTACGCGCTGAACGGGAAACTCGCGACAGGCGGGAAGCTGACAGAGCTGCAGAGGTCGCTGCGCGACCATCTGGACACGGCGCTGGAGAAGCTGCCGGTTTACCGGGGAACGGTATACCGGCACTACGACTTCGATTCTTTCGGCGGATACGACGCGATGGCGGAGTTCCTTCAGCTGTTCCGAAAGGGAAAGCCGACGAA…
s18v1-PF_36217	74400	1	ITR	low	AAI-based completeness < 80%	1000	1	0	0.432	AATCTGCAATAGAGAATAAACGAAACTTTTGCATTCTCAGAGATTATAAAGAGTATCAAAAAATGTCGGAGGAGAGAAAGTATCAATTTACCCAAAAACTAATCAAATACGGTACCTCAGAATATGCAGATGTAGCTCTTCTAATTAATTCTGGAAAAATGGATGAACTTAGAAGATGGTTAGATCCGCAGTTGAGTTATTGTGAATGGATTTAAATGATTATTAACTCTATAGTGTTTCCTCCAGGTTTTATATCAGAGGAACACTTTTTTATTTAATGATTTATTATAATATATGTATGAAGGAGTAATATATAAATATACAAATAAAATAAATGGTAAGATTTATATAGGTCAAACCATTAATGAGAAAAGAAGATTAAATCAACATAAAAAGAGC…
s18v1_10430	37840	1	DTR	high	AAI-based completeness > 90%	141	2	0	0.347518	AAATTATAATCGTTCATATCTTAATTCCTTTAATATTCACTCGGATTTATCCCCGACGGTATTCGCCAACCGTTTGCGGCAATTCTGTCAATAAGATTTTTTGCTTTTTCAAACTCCCAAACACCGACGTGCTGAAAACCT
s18v1_28231	43534	1	DTR	high	AAI-based completeness > 90%	49	4	0	0.367347	CCCGCCACTGAAACGGAGGAAAGACCGATGAGCGAAGCAAAGAACGCCG
s18v1_46707	189550	1	DTR	high	AAI-based completeness > 90%	141	2	0	0.41844	GAATTTCTGGTGTGACAGATTTATTTTCTGCCACACTATTTGCATCACTATTTCCTCCAAATAATTTATTAAAAAGTCCCATATGTATATCCTCCTTAATTATCTATTCTCTTTCTTTCAATAAGTTTTCTAGCAAGATCA
s18v1_73166	58446	1	DTR	high	AAI-based completeness > 90%	141	2	0	0.312057	GCAGGGCGGCCGATGGTCTTAGTCCGGGTTCGACTCCCGGAGGCTGACGAATTTAAATACAAGACAACATGGACAAATCAGAAGAGATTGACAAATTAGCCATAGCGTTGGCCAAGTTCCAAGGGTCGCTAGAGCAACCAA
s18v1_72591	83598	1	DTR	high	AAI-based completeness > 90%	141	2	0	0.319149	CCAGGGCGGGGGTAGATTTTACAGAAACCTTTCCGCCAACAGGAATGACAACAACCTGGTCGCCATCAAAGTCCGCGCCGGACAGCCGTTCCGCCACCTTCGGGTTGATGCCGACCGCATCCCTGATGTTCTTGCCGAGAA
s18v1_2182	56756	1	DTR	high	AAI-based completeness > 90%	141	2	0	0.29078	AAACAAATAAATATAGGTTGGTTGCTGGTGGGTGTCCTTTTCAGCGGTAATACGAATAATGGCGTTCATGCAGGCTTCGGTTATGCGAATACGAATAACACCCCCTCGAATACGAATGCGAATGTCAGCTCTCAGCTATGA
s18v1_73173	40220	1	DTR	high	AAI-based completeness > 90%	141	2	0	0.397163	GTTCTCCTTTATTTCTTCTTTTCTACGTCTTTTCTTGCAAGCCCTGCCATATCAAGCACTGCCTGAATCTGCTTATCCGTGTATTTTCCTGATGCGATCATTGACTTAATGTAATTTGACGCTTTGGCCGCATCGCCCTGA
s18v1_72999	35920	1	DTR	high	AAI-based completeness > 90%	141	2	0	0.276596	CCGGTGACTTTTGATACAACGCCATTTTTCCCGGTAAAGAAATTAACAACGCCGTCCTTAAATCCTTTGAATTTTTGGCTGACCTTTTTCCACAGATCGCCGATACCGTCAAACAGACCTTGGGAAATAAAGCCGCCCTGC
s18v1_34384	19714	1	ITR	high	AAI-based completeness > 90%	141	1	0	0.460993	GGTTACGTAACCGTAGCTTACTTGTCTGCTTGTCGGTGGTTGTCTTTTGTTTTTTTGTTTTGTTTTGTTTTCGGGCGTGTTGTCTGTTTGTTTGTGTTATGGTGTAGTTGTCCGTTTCAAGGGAAAGGAAAAAATAAAATG
s18v1_13112	63524	1	DTR	high	AAI-based completeness > 90%	60	2	0	0.416667	TCTGGCGATGGCGATGGCGATGGCGATGGCGATGGCTCTGGCTCTGGCTATGGCTCTGGC
s18v1_72762	35362	1	DTR	high	AAI-based completeness > 90%	141	2	0	0.432624	ACAGGGCGGGATAAGAGAGTACAGCTTAAGGATATAGTGGAAATCTGGAAGAGAGAACAAAACGACGAAGGAGCTGAGAAATGATTGAACAGAGGAAGAGACAGAAGACAGGTAAAGCTGGATAGCCAGCAACACTATAAG
s18v2-PF_119680	34051	1	DTR	high	AAI-based completeness > 90%	141	2	0	0.35461	ATCCCTGCGATTGCTCCCGTCACCGGAAGAAGTTTCTTTCCCAGTGCTTCGGACTTTTTGCCAATCTTTCCGGCGATCTCCCCTGCCTTTTCAAGCGTTGAATTGCTGTCCTCTGCTGCCGTTTTCAGGTTTTTCAGATCC
s18v2-PF_117094	53903	1	DTR	high	AAI-based completeness > 90%	141	2	0	0.319149	CCCTCCGGGTCGCAGGGATACCGCAGGCCATTGGAGAACCGGGCATCAATCGGCACGGTCTCTCCGTCCATCTTGACATGGTTCGGACCGCCATCGGAACCATCACGAGGGTTCTTCTGCGGGCGGTGATGCCACGTTTTC
s18v2-PF_111640	38599	1	DTR	high	AAI-based completeness > 90%	141	2	0	0.340426	GCAGCATGTCCCTGAGCCTGCCGGCACGAGCGGTCAACTCACGGTATTCGACACGCATACGGTCCTTGTAGCCGGAGGCCTTGGCGCTCGCAGGTTTCGCTTGGTCGGCGGCCGTGAGCACTTCGATGGCCTGACGGAGGC
s18v2-PF_113534	39504	1	DTR	high	AAI-based completeness > 90%	141	2	0	0.262411	CGAATCATTCCTTGCAAGCAGCGGCGGGCCAGCGTAGCAGCCGCCCTTGGACTTTTATCCAGAATAGAACAAGCTTCAAGGTAATCTGTTCTGATGGCTTCCGGGATGTAATCTGGCAGAACCATTCCCGTATACGGAGGA
s18v2-PF_15805	38996	1	DTR	high	AAI-based completeness > 90%	141	2	0	0.319149	ACTATGAAGATACAGGCATTGTATATTCCGGTATGCCGTCCGGATGGAACTATGTAAAAGCATTTATCAAGTCAAAGTTGGGTGTGCTGTTTCCGAAGCTGATCGGCGGATCTTCAACGACTTATTTTAAATCGGCTTTCT
s18v2-PF_113092	40570	1	DTR	high	AAI-based completeness > 90%	141	2	0	0.347518	GAGCGCACCGACCGCGCCGCTGGCGATCTGCTGGCAGCTCGACCATACCTGGGCCCAATTTCCGGAAATGATGCCCTGCACCAGCCCGACGACGCCCTGCACGATCTGTCCGATCGAGGTGATCACCTGATTGACGGAGGA
s18v2-PF_118414	37078	1	DTR	high	AAI-based completeness > 90%	141	2	0	0.312057	ACCTCCGGCATCAATACCGCTTGTGATTTGACTTGCGATATCAACACCCTTATTGACGATATCTTGGGCCACATCGGCTGAGATTGTGTCTACTTGTTGGATTGCTGTGAATGTACCACCGAAGAACTTTGCGACCTTCTC
s18v2-PF_35767	40899	1	DTR	high	AAI-based completeness > 90%	141	2	0	0.404255	TGTGGGACCTGATGGTTTCATGAATATCCCGGATGGAATTGAAGAGGAACTGCCATTTAGTTAATGTCCGACTCGGACAAGATGAAAGAAGGAAAAATATGAGCGGACTTAAATTTCCAAAAGAAGAAACGAAGAAAAAAA
s18v2-PF_113952	39390	1	DTR	high	AAI-based completeness > 90%	141	2	0	0.319149	GCCTCCGTAGTTTCTTTCTCAAACGGAATCATTGGATGATGACAAAAAAACATTACCTGCCATCCTTTTTCAGAAAATTGCAAATGGTCTGCAACAAACTGAAGCTGTTCCTGACGAAAGCCCGAATCATTCTGTGCAGAA
s18v2-PF_38342	40390	1	DTR	high	AAI-based completeness > 90%	141	2	0	0.304965	GTCCGCAGGGAACTGCTTCAGCGCCTCGATCATCTGAGCGACCGTCATTGACTTCTTGCCCGCGTCTTCGGCGCCGTACTCAGTCCGCTTGGGGTTCAAAACAATGGTCGTCTGTGTCATTTCGTCGCTCCTGTGTGTCAA
s18v2_98614	37079	1	DTR	high	AAI-based completeness > 90%	141	2	0	0.319149	CACGCTCTATTGATAACTTGTTTCACATAATCTGCATCGAGATTTGTATCAAGAGCAACGAGTGAAATCTCATCATCCTTAATACTCATGAAGTAGCCTTCATCCTTATATATCGCAGCGAATATATATATCAGCACAGCG
s18v2_102499	32673	1	DTR	high	AAI-based completeness > 90%	141	2	0	0.269504	ATACACAACGTTGTCGTCCCCTACATTCTCCGGAGACAAGTGCTGCTTGTGGTGAACGATAAACCTAGGTGGCTTGCCAGTCCCCACAAAGGAACGATTGTGGCAGCGCTCACATACATAGTGCTGAGACTCTGCATAAGC
s18v2_27472	38243	1	DTR	high	AAI-based completeness > 90%	141	2	0	0.468085	AAACTAATGCGATTATTGAAATTACTAACGAAATTGTTTGTAGCTTCATCTTCTCACCTCGCTTTCTGTTACCTTTGTTATCATTATAGTTACCTCTGCTCCTTTTGTCAACTATTTTTTGTTACCTCTGTTTACTTTTTA
s18v2_100340	53903	1	DTR	high	AAI-based completeness > 90%	141	2	0	0.262411	AGCTGTGCTATCTGGCTATACGGGCGTTCGGAGGATATGACGATGAAACTTTACAAATATTCCGGCACCATCGAAGAGTTTGCCGTTGAGCGTGGCCGAATCTCCTACATCAAACTCTTTGATGTGACCGACTTCGACAAA
s18v2_100977	39390	1	DTR	high	AAI-based completeness > 90%	141	2	0	0.29078	CATTGAGAAGTACTTCCAACAGCATGGCATTCTGTACCAGATTCAGAAGCTTGACATTGCAGATTACATGTTGGAAGGGCAGGACAAGTTTGTGATCGATCGCAAGCAGAATTTGGATGAGCTTTGCAGCAATCTGTGTAC
s18v2_86829	40624	1	DTR	high	AAI-based completeness > 90%	122	2	0	0.319672	CCGGTGTAATTAAAGCGGACAGAATCAGCGCTGCGACTATCGTAAATAAGCTATCAAGCGTTGATCTGGTCAGCGTAAGAGCAATGGGTGTCAGCGGGTACATGAATTATAAAGGTACAGTA
s18v2_71647	37974	1	DTR	high	AAI-based completeness > 90%	141	2	0	0.340426	CACATGGCATATAAGAATTTGTATACTATATTCTCCAGTCGATTGCGACATTCTGTCCGTTAATGGTGATAGAGCGTACAATCTCGCTAATATATAGCCGTTTCTTTTCTACCGGCTCATGTAAGACATCTTCGATTCCGG
s18v2_99457	62277	1	DTR	high	AAI-based completeness > 90%	141	2	0	0.312057	AACCGAAGTTCTGCGTATGCCTCTGCTGTTCATGACTGTCCTGCTTAGGACATATTCTTGGCACCAAAGCTGATGCTGTCCTTTACTACATCTCCATCTGTGTCAAGCGAAATGAGATTGATATCTCCTGTCAGCACAGCT
s18v2_99860	40334	1	DTR	high	AAI-based completeness > 90%	141	2	0	0.446809	GGATATGAACCAGTAGGATGGAAAAACTATCCGGATAAAACCACCAGTGTTTCAGCAGAAAACCTAAATCATATGGATGAAGGAATTAAAAAGCTGGATACTGAAAAATTGAATATTGATAAAATTACACAGAGCACAGCA
s18v3-PF_45906	43704	1	DTR	high	AAI-based completeness > 90%	141	2	0	0.361702	AAAGTTGGGGTTTTGGAACTGAAATTGTCAGAGTTTGAAAAATACCGGGCGAGCGATGCGGAGTTGATAAAGACGTTGCAGACAAAGAACCGGGAGTTGGAACGGGTTACAACAACCCAAATGGAAACAATCAACGAATTG
s18v3-PF_46836	41718	1	DTR	high	AAI-based completeness > 90%	141	2	0	0.404255	CACCCTGCTGGAGCCCTTTCACATATGCCCGCTGGTTCCGCATTTTTGTTTCCATTTGTCTCTGCACCTGTGAAGCTTGGTAAGGAGTATATTCTTTTCCGTTATACGCTCTTGTCTGCTGTTCTTTTCTTTCCAGTTCCC
s18v3-PF_47369	58609	1	DTR	high	AAI-based completeness > 90%	141	2	0	0.276596	AGGAACTGGAAACCTCGCACCTTATGAACATTGTACGGATGCTCCTGCGCCGCCCCGAAACCGTGCAGACGATGCTCGTCTGCGATATTGAGCGCCAGACCCGCAATGTTTGGAGAGCGAATGATCTTGTTGACGAAGATG
s18v3-PF_15516	39525	1	DTR	high	AAI-based completeness > 90%	141	2	0	0.262411	CCAATTCCGGGGCGCAAGTTAAGTTGGGAATCTTGCGTCCGGGGTCAGACGGGGAAACGGCCAACAGGTTCACCAGTCGGATCATAACGTCGCCTGTTTTGCCTGAAAGATTTTGTACCTTATCAATCACACGATCTGCTA
s18v3-PF_48100	30822	1	DTR	medium	AAI-based completeness > 80%	141	2	0	0.326241	AATTTGGCTTGCCTCATAATCGGTCAGCAGGTCGCCGTTGTATGAAAGATGTTTGCGGTTAAGCTCTGTGAGTTCCTTGTGGTTATATGTTTTTTTGCTCAGCCCCTCAAAGTATGGAAAAAAGGAGTGGCGGCAGTTCCA
s18v3-PF_9193	48658	1	DTR	high	AAI-based completeness > 90%	141	2	0	0.312057	GCTAGGCTTTTTAGGTCGTTGCCGTGACCCACCGCCCCGCACTTTTAGGCTTGCGGATAGCCAAAATTGATTGATTTTCCCGTAGTTTAACGACTTCGGTCGGTCAAATGTTGTATAAAATCCGCAAATGCGGGTTTTACC
s18v3-PF_46431	38052	1	DTR	high	AAI-based completeness > 90%	141	2	0	0.368794	AGGAACTGGAACAGGAGAACCAGAAGCTGAAACAGATGCTGAAAAAAGTAGCAGATGATGCAGAGGGGCTTTTTGAAGAGTGTGCGGAATATAGCCCGTATGAAGAATGTTTAGCAAACGAATACTGCCACTACTGCGACA
s18v3-PF_48098	36741	1	DTR	high	AAI-based completeness > 90%	141	2	0	0.269504	AGGAACTGCTCGAACAGTATTTTCCCGACAACAACACCGGCGAGATTACCGAGCCGAAGGTCAGGGAGTTTTTGGGGAAAGTCATAGACTTGATCCCCGAGATAGCCGGCGGTGATCTTACCGGCACGTTCCCAAATCCGA
s18v3-PF_48111	48669	1	DTR	high	AAI-based completeness > 90%	141	2	0	0.297872	TATCAATCCTTCGGGACTGCAATAGTACCGAAAGGCCCCTACGCCTTCTTCCGGCTGCTGGCGGAAACTCTTTTTTGCATCGGCCAAGAAGTCGGAACGCGAAACCTTCACTTCGATAAGAACCGTAGCCCAATAGTTCCA
s18v3-PF_47733	44273	1	DTR	high	AAI-based completeness > 90%	141	2	0	0.319149	AGCGGCTTGCCCTTTGCCTTCTTGTCGCGGATGCGGACGATCTGGGCAAAGAGGCAGTCCCCTATTTCCGCATAGGCCGCGAGGATAGTCCACCAGTGGATGCCGCCCGTGTTGGTTTCGATGTCGTAGTCCACAGCGCGG
s18v3_31975	69320	1	DTR	medium	AAI-based completeness > 80%	141	2	0	0.347518	AGGAGGTATTGTTAGTAAGGATAATCCTGACGGAGCTTTTATCTGTGAGATAACAGGTGAAGCATACAGTTATGGTGCAGCAACATCGGTTTCAGTTGATTTCAAAAGAAAACTATCTTATCAATCAAAGTACATCTATAA
s18v3_31916	41718	1	DTR	high	AAI-based completeness > 90%	141	2	0	0.319149	ACGGAAGAGGGCTCTGTATTTAAGAAAATCCAGCCGGGGTATAATTTAATAAGCTGGGACGGTACATTTGGATTTGATTTACTACTTTATGTAGAGAGGAGCGAGCCAGAATGGACAGAATGATAGTGGCAAATACCTCCG
s18v3_12831	37819	1	DTR	high	AAI-based completeness > 90%	141	2	0	0.319149	AATGGCTAAGACCGGAGAATTTTTCGGTCTGCAAATAAATGGAGATAGCATGGAACCCAAATTCAGCAAAGGTGACGTTGTAATCGTCCGTAAACAGGATGATGCTGAATCCGGAGATATTGTTATTGCCATGGTTAATGG
s18v3_6812	36741	1	DTR	high	AAI-based completeness > 90%	141	2	0	0.283688	ATGTGTAAGAGTATGCAGAAAAAGAAAACCACCCGTATAGGTGGTTTTCTCAAAAATGCCCTCTATATGCGTTTGAGGCCGTTTTTTACTTGGTGGAGAATATCGGAGTCGAACCGATGACCTCTTGCATGCCATGCAAGC
s18v3_31196	44273	1	DTR	high	AAI-based completeness > 90%	141	2	0	0.347518	GCATGAGCGGCTCCACGGGGAGAAGGGAGGCGAAAACGATGAGGCCAAGAACCAGAGCGCGGCCGCCGATCCCAACGGACGCTGAGATACTAGCGTATGACAATGTTCCAGTGGACGTTGCGGCCCGGTATTTAGACTGGC
s18v3_31560	48658	1	DTR	high	AAI-based completeness > 90%	141	2	0	0.340426	AGGAGGTATTTTCGTGGATTCATGCAAATTCACGCCGTTTGGTTTGTGCGTAAAGACGGAGCTATTGAAGCGTGGCAAGACGCAGAAGTGGCTCGAGGAGGAGATCACAAACCGGACGGGGCTTTTTGCAGACAGCGGGTA
s18v3_31977	39525	1	DTR	high	AAI-based completeness > 90%	141	2	0	0.319149	AAGGCTATCACCGACCCTTCCACAGTTATCAAGAGATTGGCCCGGAAGGAGAAACCATCCATCGAAAGATCTATACCATGCGCATGGCAAAAAAGGTATGTGAGGATTGGGCTTCCATCCTTATGAATGGCAATACCTCCA
s18v3_31993	48669	1	DTR	high	AAI-based completeness > 90%	141	2	0	0.29078	AAACTGCCAACACCGTAGTAAATTGCGAAGGCGGGCAGTTGGTTTTTGTATATATCGTTTTATACGACCCGCTCGTTTCAAAGTAATTGGAAACGCATCGTCCGTCCTTATATACTCGGAACTTGGCCCGGTTGCCCTCCA
s18v3_7386	44730	1	DTR	high	AAI-based completeness > 90%	141	2	0	0.368794	GATCCCCACCAATATCCTGGCGGTGGTGGTGGCCATGGCCGTCACCCTGGTGGCGTTTTTCGCGGCCTGCCAGGTCATGGGCTGGGCCGTCACCTGGTACATGGTGGCCGGCGCGGTGGCCCTGGGCCTGTTCGTGGCCTA
s18v3_31171	30822	1	DTR	medium	AAI-based completeness > 80%	141	2	0	0.319149	AAACAGCCACCCACCGGTTGGTGGAGGGCTCGTATTTCTTTTGGTCCGGGACCGTTTCCAGAATGCCCTTCTGGCAGAGCTCGGTCAAACGGGGGCGCACGGCGTCCATATCATCAAAGCCCAACGCATCTTTGACCTCCC
s18v3_31972	37983	1	DTR	high	AAI-based completeness > 90%	141	2	0	0.326241	TGGAGGTATTTCAAGAATGGGTAAAGGTATTGACAGCTTAAAGCTGAAAAAGCGTTCCGAGAAGCTGGCATTTATGGAAGTGAAGACTGGAAGCACGTCCAGCTATTGCCGTTTGGAAGGCTTTACAACACAGACATTTAA
s18v3_31976	58608	1	DTR	high	AAI-based completeness > 90%	141	2	0	0.276596	CGGAGGTATTGGAACGCGTGTCTTTGGTACCCTACAGCAGGCCGTAGACGGCTTGCGAGCCAAGCTCACCCAGAGCAGTAAGAATCTCGCTAAATTCCGAAATCGCCTTATGAGCATCGTCTCCGGGGCTTTGGTGTTCAA
s18v3_31980	43069	1	DTR	high	AAI-based completeness > 90%	141	2	0	0.297872	CAGAGAAGAGCGGGTGATGATTACCGGACATAACTGGCACTGTAAAAATCGGCAGCTATCCCTTAATGACAACTGACCACAACGGGGCGTTCTATGCAGCATCCCAAGGATCTGCTGATACTCATGGCCAAGATACCTCCC
s18v3_4746	15960	1	ITR	low	AAI-based completeness < 80%	141	1	0	0.269504	TAGGGTACCTGTATACACGTAACATTTTTTCCCCATCTGCGCTACACAAAACTGTGCCATGCTACACCGCACAAAACCGTGTCACGCTGTGCGCTCACTTTCTGCGGTGCTATGCGTGACGGAAAAGTTTGTGTAGAAAAT
s18v1-PF_86066	117793	1	Provirus	medium	AAI-based completeness > 80%	NA	NA	NA	NA	NA

## Sheet: completeness
contig_id	contig_length	proviral_length	aai_expected_length	aai_completeness	aai_confidence	aai_error	aai_num_hits	aai_top_hit	aai_id	aai_af	hmm_completeness_lower	hmm_completeness_upper	hmm_num_hits	kmer_freq
s18v1_56	1181	NA	189173	0.624297	low	10.6765	3	DTR_242445	45.1	100	NA	NA	0	1
s18v1_92	1485	NA	NA	NA	NA	NA	0	NA	NA	NA	NA	NA	0	1
s18v1_133	1459	NA	401297	0.363571	high	0.767525	1	DTR_557686	90.7	62.17	NA	NA	0	1.1
s18v1_173	1326	NA	NA	NA	NA	NA	0	NA	NA	NA	NA	NA	0	1
s18v1_296	1548	NA	NA	NA	NA	NA	0	NA	NA	NA	NA	NA	0	1
s18v1_397	1515	NA	NA	NA	NA	NA	0	NA	NA	NA	NA	NA	0	1
s18v1_593	1155	NA	NA	NA	NA	NA	0	NA	NA	NA	NA	NA	0	1
s18v1_661	10625	NA	37595	28.2617	high	1.12639	1	DTR_707105	99.86	98.78	21.8681	32.3041	6	1
s18v1_810	4783	NA	256903	1.86179	low	16.0459	17	DTR_010621	35.7	28.29	NA	NA	0	1
s18v1_863	1015	NA	NA	NA	NA	NA	0	NA	NA	NA	NA	NA	0	1
s18v1_890	1798	NA	257494	0.698267	low	23.7617	6	GCA_002607345.1	26.6	61.95	NA	NA	0	1
s18v1_920	6689	NA	541724	1.23476	low	22.9182	1	GCA_004379455.1	50.6	12	NA	NA	0	1
s18v1_1023	1014	NA	NA	NA	NA	NA	0	NA	NA	NA	NA	NA	0	1
s18v1_1038	1048	NA	NA	NA	NA	NA	0	NA	NA	NA	NA	NA	0	1
s18v1_1186	1006	NA	NA	NA	NA	NA	0	NA	NA	NA	NA	NA	0	1
s18v1_1194	1059	NA	41676.1	2.54102	high	0.679579	14	DTR_419977	95	44.34	NA	NA	0	1
s18v1_1229	1159	NA	53412	2.16992	low	12.2512	2	GCA_002633645.1	37.3	29.78	NA	NA	0	1.1
s18v1_1240	1504	NA	174576	0.861516	low	11.3596	1	GCA_002956935.1	46.3	85.2	NA	NA	0	1
s18v1_1368	1060	NA	NA	NA	NA	NA	0	NA	NA	NA	NA	NA	0	1
s18v1_1410	1010	NA	56024.4	1.80279	medium	7.76411	2	GCA_004284815.1	52	52.99	NA	NA	0	1
s18v1_1465	1193	NA	127110	0.938561	low	11.4281	119	DTR_440925	40.1	100	NA	NA	0	1
s18v1_1469	1214	NA	NA	NA	NA	NA	0	NA	NA	NA	NA	NA	0	1
s18v1_1510	1432	NA	51601.2	2.77513	low	14.3861	535	GCA_002620905.1	36.7	85.23	0.72	3.99	1	1
s18v1_1573	4086	NA	76460	5.34397	low	23.3877	1	DTR_878608	25.7	32.98	NA	NA	0	1
s18v1_1667	1046	NA	NA	NA	NA	NA	0	NA	NA	NA	NA	NA	0	1.15
s18v1_1806	4257	NA	NA	NA	NA	NA	0	NA	NA	NA	NA	NA	0	1
s18v1_2027	1025	NA	43598	2.35103	medium	6.28729	15	DTR_566097	52.8	56.56	1.76854	3.26178	2	1
s18v1_2053	1136	NA	66399.2	1.71086	high	3.4323	42	DTR_138727	65.7	59.62	1.58	3.62	1	1
s18v1_2132	3686	NA	41870.4	4.12941	medium	8.79474	109	DTR_419870	34.76	52.79	2.62	6.16	1	1
s18v1_2135	1608	NA	NA	NA	NA	NA	0	NA	NA	NA	NA	NA	0	1
s18v1_2278	1177	NA	NA	NA	NA	NA	0	NA	NA	NA	NA	NA	0	1
s18v1_2296	3660	NA	NA	NA	NA	NA	0	NA	NA	NA	NA	NA	0	1
s18v1_2407	1561	NA	79984	1.95164	low	15.1381	1	DTR_203239	34.8	39.48	NA	NA	0	1
s18v1_2570	1370	NA	NA	NA	NA	NA	0	NA	NA	NA	NA	NA	0	1
s18v1_2598	1517	NA	NA	NA	NA	NA	0	NA	NA	NA	NA	NA	0	1
s18v1_2684	1996	NA	50532	3.94997	high	3.8458	7	DTR_883979	66.3	83.3	NA	NA	0	1
s18v1_2831	1576	NA	NA	NA	NA	NA	0	NA	NA	NA	NA	NA	0	1
s18v1_2886	2682	NA	NA	NA	NA	NA	0	NA	NA	NA	NA	NA	0	1
s18v1_2934	2144	NA	155695	1.37705	high	4.45453	292	DTR_757161	60.6	100	NA	NA	0	1
s18v1_3001	2916	NA	153977	1.89379	medium	6.5044	4	DTR_578167	47.9	46.14	NA	NA	0	1
s18v1_3022	48403	NA	53179.4	91.0182	high	2.88975	8	DTR_076189	56.67	25.53	43.991	94.848	6	1
s18v1_3114	1086	NA	NA	NA	NA	NA	0	NA	NA	NA	NA	NA	0	1
s18v1_3230	1565	NA	46192	3.38803	medium	8.20276	18	DTR_677960	50.39	64.98	2.28831	4.17101	2	1
s18v1_3379	1064	NA	NA	NA	NA	NA	0	NA	NA	NA	NA	NA	0	1
s18v1_3381	1104	NA	NA	NA	NA	NA	0	NA	NA	NA	NA	NA	0	1
s18v1_3439	1152	NA	NA	NA	NA	NA	0	NA	NA	NA	NA	NA	0	1
s18v1_3619	1465	NA	37911.2	3.8643	high	3.91284	2	DTR_475168	78.8	27.1	NA	NA	0	1
s18v1_3635	1100	NA	NA	NA	NA	NA	0	NA	NA	NA	NA	NA	0	1
s18v1_3799	1404	NA	42850	3.27655	high	4.0005	1	DTR_439438	72.5	41.14	NA	NA	0	1
s18v1_3834	3350	NA	67435.9	4.96768	low	10.8819	93	DTR_838850	42.3	50.88	NA	NA	0	1
s18v1_3894	1061	NA	NA	NA	NA	NA	0	NA	NA	NA	NA	NA	0	1
s18v1_3927	1156	NA	64266.1	1.79877	high	0.0862069	4	DTR_685841	99.36	57.55	NA	NA	0	1
s18v1_4072	1465	NA	NA	NA	NA	NA	0	NA	NA	NA	NA	NA	0	1
s18v1_4155	1192	NA	NA	NA	NA	NA	0	NA	NA	NA	NA	NA	0	1
s18v1_4261	1253	NA	NA	NA	NA	NA	0	NA	NA	NA	NA	NA	0	1
s18v1_4297	1017	NA	NA	NA	NA	NA	0	NA	NA	NA	NA	NA	0	1
s18v1_4316	1568	NA	NA	NA	NA	NA	0	NA	NA	NA	NA	NA	0	1
s18v1_4525	3583	NA	78798.5	4.54704	high	2.58602	4	DTR_823559	99.8	45.21	NA	NA	0	1
s18v1_4568	1814	NA	NA	NA	NA	NA	0	NA	NA	NA	NA	NA	0	1
s18v1_4569	1018	NA	NA	NA	NA	NA	0	NA	NA	NA	NA	NA	0	1
s18v1_4730	1157	NA	66480.1	1.74037	low	11.4281	21	DTR_595010	41.4	100	NA	NA	0	1
s18v1_5012	1023	NA	62039	1.64896	high	1.59376	2	DTR_392857	87.49	57.39	0.8	2.63	1	1
s18v1_5036	49675	NA	50463.6	98.4374	high	1.24962	2	DTR_744358	96.86	93.34	78.5902	100	20	1
s18v1_5067	1083	NA	79951.2	1.35458	medium	5.34452	6	DTR_705302	54.1	75.93	NA	NA	0	1
s18v1_5300	6043	NA	NA	NA	NA	NA	0	NA	NA	NA	NA	NA	0	1
s18v1_5488	1011	NA	328647	0.307625	low	13.7461	7	GCA_000871245.1	38.8	46.34	NA	NA	0	1
s18v1_5493	1489	NA	NA	NA	NA	NA	0	NA	NA	NA	NA	NA	0	1
s18v1_5584	1305	NA	81728	1.59676	medium	5.60345	1	DTR_102146	48.9	92.91	NA	NA	0	1
s18v1_5615	6566	NA	41381.4	15.867	low	19.4363	7	GCA_002616785.1	37.5	20.52	NA	NA	0	1
s18v1_5671	1798	NA	NA	NA	NA	NA	0	NA	NA	NA	NA	NA	0	1
s18v1_5734	1445	NA	NA	NA	NA	NA	0	NA	NA	NA	NA	NA	0	1
s18v1_5735	1615	NA	NA	NA	NA	NA	0	NA	NA	NA	NA	NA	0	1
s18v1_5754	1658	NA	36636	4.5256	high	1.87231	1	GCA_002958095.1	98.8	46.57	NA	NA	0	1
s18v1_5764	2157	NA	NA	NA	NA	NA	0	NA	NA	NA	NA	NA	0	1
s18v1_5823	3996	NA	86920.4	4.59731	low	14.3605	9	DTR_714553	62.7	6.71	NA	NA	0	1
s18v1_5898	1176	NA	NA	NA	NA	NA	0	NA	NA	NA	NA	NA	0	1
s18v1_6002	1094	NA	333551	0.327986	low	14.4124	1	DTR_317885	33.3	55.52	NA	NA	0	1
s18v1_6042	2176	NA	NA	NA	NA	NA	0	NA	NA	NA	NA	NA	0	1
s18v1_6051	9580	NA	47026.5	20.3715	high	1.64194	2	DTR_572156	98.66	91.94	NA	NA	0	1
s18v1_6132	1665	NA	NA	NA	NA	NA	0	NA	NA	NA	NA	NA	0	1
s18v1_6202	1001	NA	NA	NA	NA	NA	0	NA	NA	NA	NA	NA	0	1
s18v1_6228	3900	NA	62625.2	6.22753	low	12.6105	2	GCA_002610805.1	42.3	37.58	NA	NA	0	1
s18v1_6282	21726	NA	78915.1	27.5309	medium	7.58056	12	DTR_748193	67.82	13.18	11.78	64.24	1	1
s18v1_6301	1230	NA	NA	NA	NA	NA	0	NA	NA	NA	NA	NA	0	1
s18v1_6329	3807	NA	NA	NA	NA	NA	0	NA	NA	NA	NA	NA	0	1
s18v1_6496	1279	NA	185808	0.688344	medium	7.04112	9	DTR_511341	49.52	62.44	NA	NA	0	1
s18v1_6554	1467	NA	NA	NA	NA	NA	0	NA	NA	NA	NA	NA	0	1
s18v1_6575	6441	NA	50138.4	12.8464	high	3.10568	3	DTR_557528	77.77	55.89	NA	NA	0	1
s18v1_6613	1881	NA	NA	NA	NA	NA	0	NA	NA	NA	NA	NA	0	1
s18v1_6666	5223	NA	61633.3	6.48513	high	2.70372	6	DTR_419205	67.22	84.77	4.17	10.93	1	1
s18v1_6694	1060	NA	43107.9	2.45894	high	4.58852	29	DTR_065038	65.4	47.35	NA	NA	0	1
s18v1_6703	1220	NA	47765.3	2.55416	high	1.20269	17	DTR_572156	96.8	100	1.97	3.08	1	1
s18v1_6779	1048	NA	NA	NA	NA	NA	0	NA	NA	NA	NA	NA	0	1
s18v1_6899	2708	NA	NA	NA	NA	NA	0	NA	NA	NA	NA	NA	0	1
s18v1_6962	3025	NA	60657	4.98705	medium	6.5044	12	DTR_102146	49.1	46.1	NA	NA	0	1
s18v1_6980	1253	NA	NA	NA	NA	NA	0	NA	NA	NA	NA	NA	0	1
s18v1_7165	1244	NA	NA	NA	NA	NA	0	NA	NA	NA	NA	NA	0	1
s18v1_7175	49522	NA	58225.7	85.0518	high	2.17394	4	DTR_624708	95.64	82.09	52.1416	90.6424	20	1
s18v1_7325	1149	NA	43278	2.65493	low	11.0823	1	GCA_002603985.1	38.6	69.39	NA	NA	0	1
s18v1_7447	3084	NA	87733.6	3.51519	low	11.9201	3	DTR_558292	29.89	100	NA	NA	0	1
s18v1_7483	5209	NA	395514	1.31702	high	1.33008	3	DTR_557686	93.71	90.1	NA	NA	0	1
s18v1_7581	1077	NA	46403.2	2.32096	high	3.42478	5	DTR_419608	70.4	100	NA	NA	0	1
s18v1_7759	1050	NA	NA	NA	NA	NA	0	NA	NA	NA	NA	NA	0	1
s18v1_7770	1351	NA	NA	NA	NA	NA	0	NA	NA	NA	NA	NA	0	1
s18v1_7785	1112	NA	NA	NA	NA	NA	0	NA	NA	NA	NA	NA	0	1
s18v1_7902	1723	NA	302675	0.569257	medium	9.82267	7	GCA_000869685.1	45.8	45.12	NA	NA	0	1
s18v1_8009	1509	NA	178437	0.845675	low	21.1661	5	GCA_000917535.1	27.8	46.55	NA	NA	0	1
s18v1_8034	1078	NA	77157	1.39715	high	0.126792	1	DTR_472160	98.7	64.2	NA	NA	0	1
s18v1_8083	4172	NA	39766.4	10.4913	high	1.30794	12	DTR_686818	98.45	82.49	5.56871	12.3441	2	1
s18v1_8153	3576	NA	NA	NA	NA	NA	0	NA	NA	NA	NA	NA	0	1
s18v1_8180	1253	NA	NA	NA	NA	NA	0	NA	NA	NA	NA	NA	0	1
s18v1_8375	1663	NA	NA	NA	NA	NA	0	NA	NA	NA	NA	NA	0	1
s18v1_8382	1083	NA	NA	NA	NA	NA	0	NA	NA	NA	NA	NA	0	1
s18v1_8535	20639	NA	67996.2	30.3532	medium	7.29955	2	DTR_253597	27.95	32.23	18.79	58.06	1	1
s18v1_8576	4944	NA	463722	1.06616	low	10.2655	1	DTR_363237	48.4	42.2	NA	NA	0	1
s18v1_8738	45595	NA	44997.6	100	high	1.24962	6	DTR_420872	96.03	97.14	68.0209	100	29	1
s18v1_8949	3260	NA	2473870	0.131777	low	29.5169	1	GCA_000911955.1	25.3	42.9	NA	NA	0	1
s18v1_9235	1887	NA	NA	NA	NA	NA	0	NA	NA	NA	NA	NA	0	1
s18v1_9312	4764	NA	47449.8	10.0401	medium	6.36	49	DTR_571780	38.83	85.57	8.22937	12.7108	4	1
s18v1_9334	3213	NA	2077288	0.154673	low	29.1924	1	GCA_003233895.1	26	50.29	NA	NA	0	1
s18v1_9540	2318	NA	81728	2.83624	high	3.64337	1	DTR_102146	65.44	100	NA	NA	0	1
s18v1_9686	36971	NA	60242.2	61.3706	medium	5.03187	430	DTR_395485	46.21	45.75	56.26	71.9955	24	1
s18v1_9722	1197	NA	NA	NA	NA	NA	0	NA	NA	NA	NA	NA	0	1
s18v1_9840	1511	NA	40071.5	3.77076	high	1.10574	11	DTR_507090	98.39	93.39	2.42	4.06	1	1
s18v1_9861	1412	NA	NA	NA	NA	NA	0	NA	NA	NA	NA	NA	0	1
s18v1_9902	2269	NA	NA	NA	NA	NA	0	NA	NA	NA	NA	NA	0	1
s18v1_9974	1035	NA	NA	NA	NA	NA	0	NA	NA	NA	NA	NA	0	1
s18v1_9985	6329	NA	NA	NA	NA	NA	0	NA	NA	NA	NA	NA	0	1
s18v1_10077	1373	NA	NA	NA	NA	NA	0	NA	NA	NA	NA	NA	0	1
s18v1_10189	6506	NA	44560.5	14.6004	high	1.41627	21	DTR_539808	94.87	87.26	11.0354	20.1614	2	1
s18v1_10202	3699	NA	105911	3.49257	high	3.01471	4	DTR_454372	80.9	34.43	NA	NA	0	1
s18v1_10226	1434	NA	NA	NA	NA	NA	0	NA	NA	NA	NA	NA	0	1
s18v1_10360	3022	NA	NA	NA	NA	NA	0	NA	NA	NA	NA	NA	0	1
s18v1_10502	179793	NA	183459	98.0016	high	1.32143	5	DTR_494348	98.93	96.46	86.0197	100	27	1
s18v1_10556	1213	NA	63746	1.90286	high	0.763683	1	DTR_386756	97.7	90.94	NA	NA	0	1
s18v1_10566	1004	NA	46901.9	2.14064	high	0.126792	23	DTR_572976	100	64.36	NA	NA	0	1
s18v1_10670	1140	NA	NA	NA	NA	NA	0	NA	NA	NA	NA	NA	0	1
s18v1_10857	1217	NA	NA	NA	NA	NA	0	NA	NA	NA	NA	NA	0	1
s18v1_10905	1352	NA	NA	NA	NA	NA	0	NA	NA	NA	NA	NA	0	1
s18v1_10914	1172	NA	NA	NA	NA	NA	0	NA	NA	NA	NA	NA	0	1
s18v1_10951	3282	NA	NA	NA	NA	NA	0	NA	NA	NA	NA	NA	0	1
s18v1_11164	1035	NA	NA	NA	NA	NA	0	NA	NA	NA	NA	NA	0	1
s18v1_11199	1250	NA	NA	NA	NA	NA	0	NA	NA	NA	NA	NA	0	1
s18v1_11202	1464	NA	NA	NA	NA	NA	0	NA	NA	NA	NA	NA	0	1
s18v1_11210	4215	NA	NA	NA	NA	NA	0	NA	NA	NA	NA	NA	0	1
s18v1_11274	1242	NA	68198.5	1.82115	low	14.6029	3	DTR_528582	33.2	73.51	NA	NA	0	1
s18v1_11350	1080	NA	NA	NA	NA	NA	0	NA	NA	NA	NA	NA	0	1
s18v1_11446	2393	NA	NA	NA	NA	NA	0	NA	NA	NA	NA	NA	0	1
s18v1_11456	30170	NA	80600	37.4318	low	12.0387	40	DTR_376221	36.31	17.77	14.58	33.25	1	1
s18v1_11489	1090	NA	NA	NA	NA	NA	0	NA	NA	NA	NA	NA	0	1
s18v1_11529	2261	NA	85282.7	2.65118	low	21.1661	9	DTR_563885	29.7	47.33	NA	NA	0	1
s18v1_11531	1227	NA	NA	NA	NA	NA	0	NA	NA	NA	NA	NA	0	1
s18v1_11560	1854	NA	NA	NA	NA	NA	0	NA	NA	NA	NA	NA	0	1
s18v1_11647	3236	NA	33253	9.73145	low	14.8448	1	GCA_002610825.1	39.4	28.74	NA	NA	0	1
s18v1_11835	1683	NA	NA	NA	NA	NA	0	NA	NA	NA	NA	NA	0	1
s18v1_11840	4394	NA	61174.1	7.18278	low	14.6912	39	DTR_748193	34.5	35.96	NA	NA	0	1
s18v1_11889	1591	NA	NA	NA	NA	NA	0	NA	NA	NA	NA	NA	0	1
s18v1_11981	7907	NA	44645.8	17.7105	high	1.12639	19	DTR_572976	98.48	100	5.66	24.09	1	1
s18v1_12039	1087	NA	NA	NA	NA	NA	0	NA	NA	NA	NA	NA	0	1
s18v1_12117	1342	NA	NA	NA	NA	NA	0	NA	NA	NA	NA	NA	0	1
s18v1_12126	2296	NA	NA	NA	NA	NA	0	NA	NA	NA	NA	NA	0	1
s18v1_12133	1207	NA	NA	NA	NA	NA	0	NA	NA	NA	NA	NA	0	1
s18v1_12205	1120	NA	159658	0.701501	high	3.90092	2	GCA_002606525.1	66	100	NA	NA	0	1
s18v1_12243	39621	NA	36636	89.2237	high	1.83904	1	GCA_002958095.1	98.27	86.3	71.4015	94.4062	12	1
s18v1_12262	7365	NA	50158.6	14.6834	low	25.7556	2	DTR_603561	29.2	14.87	NA	NA	0	1
s18v1_12284	3569	NA	38671	9.22914	high	1.28201	1	DTR_748193	99.68	88.15	NA	NA	0	1
s18v1_12597	4559	NA	43550	10.4684	medium	9.77042	13	DTR_868016	42.7	45.58	NA	NA	0	1
s18v1_12633	2278	NA	NA	NA	NA	NA	0	NA	NA	NA	NA	NA	0	1
s18v1_12641	1900	NA	390938	0.486011	low	11.739	1	DTR_183200	38.1	39.02	NA	NA	0	1
s18v1_12758	1669	NA	72908.7	2.28916	low	10.3754	17	DTR_238037	39.1	79.68	NA	NA	0	1
s18v1_12815	1022	NA	NA	NA	NA	NA	0	NA	NA	NA	NA	NA	0	1
s18v1_12834	1322	NA	134405	0.983597	high	3.54623	156	DTR_802955	68.5	79.91	NA	NA	0	1
s18v1_12916	1169	NA	NA	NA	NA	NA	0	NA	NA	NA	NA	NA	0	1
s18v1_12938	2424	NA	61466.6	3.9436	high	3.26296	5	DTR_392857	93.92	47.69	NA	NA	0	1
s18v1_13025	37802	NA	60531.8	62.4498	high	2.84758	3	DTR_466130	86.28	39.16	35.2602	98.1637	7	1
s18v1_13085	16832	NA	109108	15.4269	high	1.37296	5	DTR_400748	96.54	90.35	12.0575	36.7295	4	1
s18v1_13088	3186	NA	134211	2.37388	low	10.6944	3	DTR_200411	41.3	64.71	NA	NA	0	1
s18v1_13202	1035	NA	NA	NA	NA	NA	0	NA	NA	NA	NA	NA	0	1
s18v1_13209	1539	NA	NA	NA	NA	NA	0	NA	NA	NA	NA	NA	0	1
s18v1_13231	3636	NA	86432.2	4.20677	high	4.96213	2	DTR_243377	22.7	100	NA	NA	0	1
s18v1_13233	2377	NA	247737	0.959485	low	15.5486	1	DTR_620992	45.6	26.73	NA	NA	0	1
s18v1_13327	1839	NA	NA	NA	NA	NA	0	NA	NA	NA	NA	NA	0	1
s18v1_13331	4171	NA	80553.8	5.1779	high	2.07254	48	DTR_564020	78.76	83.15	2.71655	12.1729	2	1
s18v1_13349	6502	NA	44537.5	14.5989	high	1.4136	21	DTR_572976	100	87.26	11.0254	20.1414	2	1
s18v1_13380	4370	NA	45517.8	9.60063	high	1.52052	128	DTR_816768	82.93	94.73	6.80275	11.7488	2	1
s18v1_13418	3244	NA	NA	NA	NA	NA	0	NA	NA	NA	NA	NA	0	1
s18v1_13432	1832	NA	331785	0.552165	high	3.62494	2	DTR_363237	48.4	54.86	NA	NA	0	1
s18v1_13454	2632	NA	67092	3.92297	high	1.69257	2	DTR_520009	94.04	86.67	3.10791	7.79246	4	1
s18v1_13464	8431	NA	44586.9	18.9092	high	2.36827	18	DTR_572976	100	71.78	9.06877	24.9687	3	1
s18v1_13799	1056	NA	NA	NA	NA	NA	0	NA	NA	NA	NA	NA	0	1
s18v1_14043	1564	NA	NA	NA	NA	NA	0	NA	NA	NA	NA	NA	0	1
s18v1_14102	1303	NA	367944	0.35413	low	13.92	1	DTR_048777	34.5	100	NA	NA	0	1
s18v1_14124	1792	NA	411771	0.435194	low	14.0348	5	GCA_000904035.1	27.8	85.54	NA	NA	0	1
s18v1_14300	1085	NA	NA	NA	NA	NA	0	NA	NA	NA	NA	NA	0	1
s18v1_14333	1049	NA	43588.3	2.40661	medium	7.29638	11	DTR_852415	52.4	100	0.84	2.49	1	1
s18v1_14506	1008	NA	NA	NA	NA	NA	0	NA	NA	NA	NA	NA	0	1
s18v1_14590	1045	NA	NA	NA	NA	NA	0	NA	NA	NA	NA	NA	0	1
s18v1_14624	1135	NA	119335	0.951102	low	13.92	2	DTR_097817	35	100	NA	NA	0	1
s18v1_14721	4230	NA	NA	NA	NA	NA	0	NA	NA	NA	NA	NA	0	1
s18v1_14736	1097	NA	NA	NA	NA	NA	0	NA	NA	NA	NA	NA	0	1
s18v1_14784	1750	NA	42337	4.1335	high	1.34465	1	DTR_387035	92.9	87.67	NA	NA	0	1
s18v1_14830	1315	NA	NA	NA	NA	NA	0	NA	NA	NA	NA	NA	0	1
s18v1_14876	1581	NA	332598	0.475349	medium	8.47686	1	DTR_267796	39.3	100	NA	NA	0	1
s18v1_14923	1185	NA	NA	NA	NA	NA	0	NA	NA	NA	NA	NA	0	1
s18v1_14955	1412	NA	NA	NA	NA	NA	0	NA	NA	NA	NA	NA	0	1
s18v1_15128	1814	NA	NA	NA	NA	NA	0	NA	NA	NA	NA	NA	0	1
s18v1_15162	1263	NA	153154	0.82466	low	10.7013	6	DTR_354603	41.5	67.29	NA	NA	0	1
s18v1_15195	1025	NA	NA	NA	NA	NA	0	NA	NA	NA	NA	NA	0	1
s18v1_15242	36882	NA	60678.4	60.7828	high	1.32143	4	DTR_799127	97.89	95.65	47.9631	96.9788	20	1
s18v1_15353	8491	NA	68026.3	12.4819	medium	9.48838	34	DTR_350808	43.06	24.87	4.61	25.1	1	1
s18v1_15362	1192	NA	41821.1	2.85024	low	10.6765	8	DTR_868016	44	100	NA	NA	0	1
s18v1_15373	1207	NA	814661	0.14816	high	4.73858	4	GCA_002966405.1	57.7	100	NA	NA	0	1
s18v1_15635	6963	NA	78264.4	8.89676	low	25.8572	3	GCA_002955325.1	40.9	6.39	NA	NA	0	1
s18v1_15669	1279	NA	NA	NA	NA	NA	0	NA	NA	NA	NA	NA	0	1
s18v1_15675	1673	NA	NA	NA	NA	NA	0	NA	NA	NA	NA	NA	0	1
s18v1_15682	1233	NA	43769.8	2.81701	medium	9.12158	113	GCA_002624405.1	43.6	69.12	1.64399	3.70569	2	1
s18v1_15698	7991	NA	80663.5	5.18202	high	1.81382	24	DTR_802734	94.86	86.16	3.77485	11.7969	2	1
s18v1_15701	178707	NA	172425	100	high	1.68749	1	DTR_539559	97.65	87.83	88.1011	100	37	1
s18v1_15781	1207	NA	101449	1.18976	medium	5.28181	35	DTR_178505	56.6	62.15	NA	NA	0	1
s18v1_15811	1794	NA	87964	2.03947	low	23.4655	1	DTR_253597	24.9	63.6	NA	NA	0	1
s18v1_15884	1228	NA	463722	0.264814	low	15.118	1	DTR_363237	34.9	93.7	NA	NA	0	1
s18v1_15954	1437	NA	906156	0.158582	low	11.0823	15	GCA_002966375.1	39.6	68.97	NA	NA	0	1
s18v1_16059	1203	NA	195105	0.616591	low	14.4124	1	DTR_416065	33.8	56.43	NA	NA	0	1
s18v1_16087	3170	NA	97936.2	3.2368	low	15.7602	3	DTR_611353	33	33.81	NA	NA	0	1
s18v1_16173	1114	NA	NA	NA	NA	NA	0	NA	NA	NA	NA	NA	0	1
s18v1_16190	1030	NA	NA	NA	NA	NA	0	NA	NA	NA	NA	NA	0	1.05
s18v1_16400	1996	NA	NA	NA	NA	NA	0	NA	NA	NA	NA	NA	0	1
s18v1_16522	1666	NA	NA	NA	NA	NA	0	NA	NA	NA	NA	NA	0	1
s18v1_16721	1058	NA	NA	NA	NA	NA	0	NA	NA	NA	NA	NA	0	1
s18v1_16785	3253	NA	NA	NA	NA	NA	0	NA	NA	NA	NA	NA	0	1
s18v1_16905	1630	NA	36636	4.44918	high	1.61047	1	GCA_002958095.1	99.61	68.31	NA	NA	0	1
s18v1_17033	1119	NA	NA	NA	NA	NA	0	NA	NA	NA	NA	NA	0	1
s18v1_17090	1039	NA	NA	NA	NA	NA	0	NA	NA	NA	NA	NA	0	1
s18v1_17122	1346	NA	37205.3	3.61777	high	1.21635	7	DTR_829351	96	90.62	NA	NA	0	1
s18v1_17143	1234	NA	NA	NA	NA	NA	0	NA	NA	NA	NA	NA	0	1
s18v1_17319	1067	NA	NA	NA	NA	NA	0	NA	NA	NA	NA	NA	0	1
s18v1_17396	1059	NA	NA	NA	NA	NA	0	NA	NA	NA	NA	NA	0	1
s18v1_17504	4474	NA	250441	1.78645	low	23.3177	1	DTR_301658	30.1	22.37	NA	NA	0	1
s18v1_17513	1056	NA	39179	2.69532	medium	5.99083	1	GCA_003958845.1	57.3	100	NA	NA	0	1
s18v1_17600	1440	NA	NA	NA	NA	NA	0	NA	NA	NA	NA	NA	0	1
s18v1_17618	2287	NA	NA	NA	NA	NA	0	NA	NA	NA	NA	NA	0	1
s18v1_17696	1106	NA	463722	0.238505	low	13.8078	1	DTR_363237	34.4	60.47	NA	NA	0	1
s18v1_17848	10676	NA	40340.1	26.465	high	1.35935	5	DTR_886516	96.64	93.96	17.3926	38.305	12	1
s18v1_17852	3849	NA	NA	NA	NA	NA	0	NA	NA	NA	NA	NA	0	1
s18v1_17928	1746	NA	NA	NA	NA	NA	0	NA	NA	NA	NA	NA	0	1
s18v1_18022	1029	NA	463722	0.2219	low	13.92	1	DTR_363237	36.5	100	NA	NA	0	1
s18v1_18046	1180	NA	NA	NA	NA	NA	0	NA	NA	NA	NA	NA	0	1
s18v1_18218	1022	NA	NA	NA	NA	NA	0	NA	NA	NA	NA	NA	0	1
s18v1_18240	1646	NA	NA	NA	NA	NA	0	NA	NA	NA	NA	NA	0	1
s18v1_18271	1548	NA	NA	NA	NA	NA	0	NA	NA	NA	NA	NA	0	1
s18v1_18276	101212	NA	99111.2	100	high	1.45242	12	DTR_529915	85.48	91.25	64.2514	100	17	1
s18v1_18307	1337	NA	NA	NA	NA	NA	0	NA	NA	NA	NA	NA	0	1
s18v1_18385	5078	NA	162744	3.12024	low	16.3547	85	DTR_119393	38.6	18.92	NA	NA	0	1
s18v1_18566	1565	NA	NA	NA	NA	NA	0	NA	NA	NA	NA	NA	0	1
s18v1_18678	1739	NA	161703	1.07543	high	1.56971	8	DTR_728854	94.22	100	NA	NA	0	1
s18v1_18996	1805	NA	NA	NA	NA	NA	0	NA	NA	NA	NA	NA	0	1
s18v1_19106	1660	NA	1.09227e+06	0.151977	medium	8.47686	7	GCA_002924555.1	39.3	100	NA	NA	0	1
s18v1_19108	3201	NA	40599.2	7.88439	high	3.42649	25	DTR_518885	92.4	46.33	NA	NA	0	1
s18v1_19237	1085	NA	NA	NA	NA	NA	0	NA	NA	NA	NA	NA	0	1
s18v1_19245	1439	NA	38271.3	3.75999	high	0.4212	34	DTR_568518	100	82.33	1.75349	4.11191	2	1
s18v1_19257	3900	NA	NA	NA	NA	NA	0	NA	NA	NA	NA	NA	0	1
s18v1_19263	1150	NA	NA	NA	NA	NA	0	NA	NA	NA	NA	NA	0	1
s18v1_19304	4345	NA	65326.9	6.65117	high	1.25849	8	DTR_726481	93.49	98.24	5.05	16.92	1	1
s18v1_19385	3576	NA	37979.5	9.41561	high	1.15325	13	DTR_680411	91.19	94.07	5.0133	10.498	5	1
s18v1_19388	1090	NA	NA	NA	NA	NA	0	NA	NA	NA	NA	NA	0	1
s18v1_19532	1175	NA	NA	NA	NA	NA	0	NA	NA	NA	NA	NA	0	1
s18v1_19547	2394	NA	44353	5.39761	high	1.95717	24	DTR_572976	93.62	76.99	4.22304	7.58391	2	1
s18v1_19562	1338	NA	63136.9	2.1192	medium	9.12158	14	DTR_385760	42.51	68.59	NA	NA	0	1
s18v1_19590	1036	NA	NA	NA	NA	NA	0	NA	NA	NA	NA	NA	0	1
s18v1_19772	1431	NA	NA	NA	NA	NA	0	NA	NA	NA	NA	NA	0	1
s18v1_19892	4140	NA	61682.8	6.71176	high	3.1521	4	DTR_466130	70.1	76.13	NA	NA	0	1
s18v1_19952	1337	NA	43651	3.06293	low	13.92	1	DTR_539762	36.6	100	NA	NA	0	1
s18v1_19962	1498	NA	143986	1.04038	low	19.978	1	GCA_000903255.1	30.4	91.63	NA	NA	0	1
s18v1_20055	53859	NA	53498.1	100	high	2.09735	23	DTR_801722	93.36	74.72	81.5979	100	23	1
s18v1_20101	1279	NA	NA	NA	NA	NA	0	NA	NA	NA	NA	NA	0	1
s18v1_20141	1166	NA	NA	NA	NA	NA	0	NA	NA	NA	NA	NA	0	1
s18v1_20179	1028	NA	NA	NA	NA	NA	0	NA	NA	NA	NA	NA	0	1
s18v1_20192	1176	NA	NA	NA	NA	NA	0	NA	NA	NA	NA	NA	0	1
s18v1_20233	8133	NA	78023.9	10.4237	low	21.4178	9	DTR_238502	65.6	7.41	NA	NA	0	1
s18v1_20273	2355	NA	59870	3.93352	low	13.7748	1	GCA_002616785.1	53.4	14.25	NA	NA	0	1
s18v1_20431	2122	NA	NA	NA	NA	NA	0	NA	NA	NA	NA	NA	0	1
s18v1_20462	1577	NA	72303.5	2.18108	medium	5.86385	4	DTR_250645	51.1	100	NA	NA	0	1
s18v1_20469	1561	NA	NA	NA	NA	NA	0	NA	NA	NA	NA	NA	0	1
s18v1_20541	1016	NA	41816	2.42969	low	17.9409	1	DTR_538459	32.3	49.61	NA	NA	0	1
s18v1_20579	1016	NA	22186.1	4.57945	high	0.680249	16	GCA_003314815.1	99.65	84.48	2.95794	4.57762	3	1
s18v1_20781	1378	NA	NA	NA	NA	NA	0	NA	NA	NA	NA	NA	0	1
s18v1_20843	4357	NA	63301.5	6.88293	high	2.18287	2	DTR_466130	96.11	76.18	NA	NA	0	1
s18v1_20916	1647	NA	871010	0.189091	low	14.7807	2	DTR_410932	34.3	44.14	NA	NA	0	1
s18v1_20950	1463	NA	NA	NA	NA	NA	0	NA	NA	NA	NA	NA	0	1
s18v1_20986	1379	NA	NA	NA	NA	NA	0	NA	NA	NA	NA	NA	0	1
s18v1_20993	1267	NA	NA	NA	NA	NA	0	NA	NA	NA	NA	NA	0	1
s18v1_21107	1008	NA	NA	NA	NA	NA	0	NA	NA	NA	NA	NA	0	1
s18v1_21120	1104	NA	NA	NA	NA	NA	0	NA	NA	NA	NA	NA	0	1
s18v1_21149	1148	NA	82904	1.38473	medium	7.80314	11	DTR_517157	63.8	25.27	NA	NA	0	1
s18v1_21220	1030	NA	NA	NA	NA	NA	0	NA	NA	NA	NA	NA	0	1
s18v1_21375	1082	NA	229873	0.470695	low	13.92	2	DTR_889549	35.8	100	NA	NA	0	1
s18v1_21393	15268	NA	247209	6.17615	high	2.91969	5	DTR_419006	63.5	57.08	12.91	43.86	1	1
s18v1_21533	1067	NA	NA	NA	NA	NA	0	NA	NA	NA	NA	NA	0	1
s18v1_21569	1109	NA	NA	NA	NA	NA	0	NA	NA	NA	NA	NA	0	1
s18v1_21582	1466	NA	NA	NA	NA	NA	0	NA	NA	NA	NA	NA	0	1
s18v1_21689	4236	NA	78914.1	5.36786	high	1.28201	144	DTR_509388	99.91	89.59	5.23019	9.4577	2	1
s18v1_21769	3058	NA	127772	2.39332	low	17.126	21	DTR_351445	46.6	14.62	NA	NA	0	1
s18v1_21921	1106	NA	92197.3	1.1996	low	20.4535	16	DTR_356037	30.7	93.82	NA	NA	0	1
s18v1_22062	1335	NA	21962	6.07867	medium	9.03043	17	GCA_002755055.1	44.1	87.02	3.18	8.94	1	1
s18v1_22077	2202	NA	NA	NA	NA	NA	0	NA	NA	NA	NA	NA	0	1
s18v1_22120	11925	NA	90000	13.25	high	3.71485	1	GCA_002955325.1	58.09	38.55	NA	NA	0	1
s18v1_22191	1409	NA	NA	NA	NA	NA	0	NA	NA	NA	NA	NA	0	1
s18v1_22305	1034	NA	NA	NA	NA	NA	0	NA	NA	NA	NA	NA	0	1
s18v1_22327	12461	NA	78532.3	15.8674	low	22.0478	36	DTR_865913	26.1	26.15	NA	NA	0	1
s18v1_22651	1011	NA	37022.8	2.73075	low	13.92	5	DTR_879615	32.6	100	NA	NA	0	1
s18v1_22682	3958	NA	257727	1.53573	low	13.9758	2	GCA_001887825.1	42.3	29.14	NA	NA	0	1
s18v1_22755	8114	NA	NA	NA	NA	NA	0	NA	NA	NA	NA	NA	0	1
s18v1_22876	1413	NA	153574	0.92008	high	2.13894	3	DTR_354727	78.9	91.77	NA	NA	0	1
s18v1_22920	1716	NA	NA	NA	NA	NA	0	NA	NA	NA	NA	NA	0	1
s18v1_22997	1449	NA	219610	0.659806	medium	6.48476	7	DTR_836952	74.1	18.56	NA	NA	0	1
s18v1_23055	15867	NA	19102.9	83.0609	medium	7.03193	8	GCA_002755055.1	34.02	45.58	50.1366	90.9733	9	1
s18v1_23091	2605	NA	NA	NA	NA	NA	0	NA	NA	NA	NA	NA	0	1
s18v1_23095	1982	NA	NA	NA	NA	NA	0	NA	NA	NA	NA	NA	0	1
s18v1_23135	1605	NA	143992	1.11464	medium	6.5044	53	DTR_049995	48.4	43.71	NA	NA	0	1
s18v1_23196	1573	NA	38671	4.06765	high	2.00581	1	DTR_748193	77.6	89.67	NA	NA	0	1
s18v1_23246	46422	NA	46275.5	100	high	1.24962	7	DTR_563995	95.99	93.89	55.2587	100	13	1
s18v1_23352	4679	NA	164168	2.85012	low	18.4519	77	DTR_596701	51.5	16.74	NA	NA	0	1
s18v1_23398	2261	NA	255145	0.886162	low	11.739	14	DTR_349808	42.3	40.74	NA	NA	0	1
s18v1_23422	1702	NA	58245.1	2.92213	low	10.9971	55	DTR_267662	40.1	44.98	NA	NA	0	1
s18v1_23432	1217	NA	NA	NA	NA	NA	0	NA	NA	NA	NA	NA	0	1
s18v1_23491	1000	NA	40813.4	2.45018	high	1.1309	42	DTR_842303	99.7	100	1.48	2.76	1	1
s18v1_23672	45481	NA	45018.5	100	high	2.35585	259	DTR_792335	87.99	82.23	76.1475	100	17	1
s18v1_23753	1423	NA	NA	NA	NA	NA	0	NA	NA	NA	NA	NA	0	1
s18v1_23782	3301	NA	NA	NA	NA	NA	0	NA	NA	NA	NA	NA	0	1
s18v1_23832	1015	NA	NA	NA	NA	NA	0	NA	NA	NA	NA	NA	0	1
s18v1_24066	3837	NA	181781	2.11079	high	2.18287	2	DTR_595049	93.84	75.27	NA	NA	0	1
s18v1_24114	1568	NA	NA	NA	NA	NA	0	NA	NA	NA	NA	NA	0	1
s18v1_24255	1869	NA	343410	0.544247	medium	8.75659	7	DTR_247200	48.6	67.54	NA	NA	0	1
s18v1_24279	1269	NA	NA	NA	NA	NA	0	NA	NA	NA	NA	NA	0	1
s18v1_24670	1421	NA	90602	1.5684	low	13.9605	3	DTR_535083	34.69	89.27	NA	NA	0	1
s18v1_24681	1535	NA	NA	NA	NA	NA	0	NA	NA	NA	NA	NA	0	1
s18v1_24739	3936	NA	148531	2.64995	low	12.4955	431	DTR_558292	37.3	39.2	NA	NA	0	1
s18v1_25045	39463	NA	38586	100	high	2.00678	1	DTR_686590	91.71	84.05	69.6693	99.806	24	1
s18v1_25068	1183	NA	NA	NA	NA	NA	0	NA	NA	NA	NA	NA	0	1
s18v1_25097	1816	NA	NA	NA	NA	NA	0	NA	NA	NA	NA	NA	0	1
s18v1_25212	1238	NA	NA	NA	NA	NA	0	NA	NA	NA	NA	NA	0	1
s18v1_25408	1093	NA	193757	0.564109	medium	6.26295	6	DTR_003847	59.6	57.23	NA	NA	0	1
s18v1_25418	6993	NA	NA	NA	NA	NA	0	NA	NA	NA	NA	NA	0	1
s18v1_25424	1233	NA	NA	NA	NA	NA	0	NA	NA	NA	NA	NA	0	1
s18v1_25540	3368	NA	183238	1.83805	low	10.7618	1	DTR_347290	58.5	19.37	0.27	1.94	1	1
s18v1_25556	1321	NA	NA	NA	NA	NA	0	NA	NA	NA	NA	NA	0	1
s18v1_25780	1152	NA	NA	NA	NA	NA	0	NA	NA	NA	NA	NA	0	1
s18v1_25832	3766	NA	73271.8	5.13977	high	3.2493	2	DTR_354727	80.6	51	NA	NA	0	1
s18v1_25860	14978	NA	80290.3	18.6548	high	2.69618	62	DTR_509818	86.97	71.73	16.4713	40.261	4	1
s18v1_25917	1306	NA	75117.5	1.73861	medium	7.29638	10	DTR_729594	52.1	100	NA	NA	0	1
s18v1_25982	1001	NA	61044.4	1.63979	medium	9.40392	16	DTR_565737	42.6	62.61	1.53755	2.54799	2	1
s18v1_25992	1857	NA	60204.2	3.0845	high	3.28702	429	DTR_403749	73.4	65.42	2.78	6.09	1	1
s18v1_26063	1102	NA	NA	NA	NA	NA	0	NA	NA	NA	NA	NA	0	1
s18v1_26192	2087	NA	NA	NA	NA	NA	0	NA	NA	NA	NA	NA	0	1
s18v1_26194	1008	NA	NA	NA	NA	NA	0	NA	NA	NA	NA	NA	0	1
s18v1_26266	12734	NA	80531.2	15.8125	high	2.27822	69	DTR_682980	94.06	67.65	8.06226	31.3134	5	1
s18v1_26316	1285	NA	NA	NA	NA	NA	0	NA	NA	NA	NA	NA	0	1
s18v1_26338	1221	NA	NA	NA	NA	NA	0	NA	NA	NA	NA	NA	0	1
s18v1_26500	1081	NA	NA	NA	NA	NA	0	NA	NA	NA	NA	NA	0	1
s18v1_26506	1141	NA	NA	NA	NA	NA	0	NA	NA	NA	NA	NA	0	1
s18v1_26548	6311	NA	39744.1	15.8791	low	13.0127	18	DTR_832849	43.5	22.73	NA	NA	0	1
s18v1_26757	1059	NA	NA	NA	NA	NA	0	NA	NA	NA	NA	NA	0	1
s18v1_26975	1064	NA	37395	2.8453	high	0.019972	2	DTR_561317	100	45.42	NA	NA	0	1
s18v1_27018	2004	NA	182874	1.09584	high	1.34213	3	DTR_494348	98.13	86.52	NA	NA	0	1
s18v1_27082	4020	NA	53868.5	7.46262	high	1.21561	11	GCA_002958105.1	88.13	100	4.34781	11.5466	2	1
s18v1_27184	5640	NA	34637.5	16.2829	high	1.52052	5	DTR_834623	85.56	97.04	10.3344	17.6863	4	1
s18v1_27258	1163	NA	50028.3	2.32468	low	13.7461	3	DTR_043656	39.2	43.89	NA	NA	0	1
s18v1_27302	2006	NA	NA	NA	NA	NA	0	NA	NA	NA	NA	NA	0	1
s18v1_27499	3112	NA	NA	NA	NA	NA	0	NA	NA	NA	NA	NA	0	1
s18v1_27503	16674	NA	22898.5	72.817	medium	5.16798	18	GCA_003655805.1	32.05	37.81	56.1186	98.2318	6	1
s18v1_27544	36625	NA	36105.4	100	high	1.24962	25	DTR_492279	95.01	97.24	53.7474	100	11	1
s18v1_27626	1377	NA	162095	0.849504	medium	9.83914	2	GCA_002956935.1	45.2	53.99	NA	NA	0	1
s18v1_27654	1694	NA	42863.7	3.95206	high	1.69257	8	DTR_848904	93.36	86.37	1.07	4.69	1	1
s18v1_27701	4814	NA	NA	NA	NA	NA	0	NA	NA	NA	NA	NA	0	1
s18v1_27703	1319	NA	178215	0.740116	low	19.0716	7	DTR_202280	31	100	NA	NA	0	1
s18v1_27778	1265	NA	NA	NA	NA	NA	0	NA	NA	NA	NA	NA	0	1
s18v1_27780	1492	NA	47940.4	3.1122	high	0.680249	4	DTR_572976	99.43	84.26	NA	NA	0	1
s18v1_27878	1783	NA	142129	1.25449	high	4.50195	1	DTR_177695	56.7	100	NA	NA	0	1
s18v1_27887	1466	NA	NA	NA	NA	NA	0	NA	NA	NA	NA	NA	0	1
s18v1_27915	1673	NA	NA	NA	NA	NA	0	NA	NA	NA	NA	NA	0	1
s18v1_27966	3599	NA	14907.7	24.1419	medium	9.04974	2	DTR_573992	33.2	43.22	NA	NA	0	1
s18v1_28141	117632	NA	262962	44.7335	high	2.72602	2	DTR_419006	54.04	81.77	63.5477	100	17	1
s18v1_28318	1553	NA	NA	NA	NA	NA	0	NA	NA	NA	NA	NA	0	1
s18v1_28335	5782	NA	131464	4.39816	low	25.7424	9	GCA_002603985.1	37.3	15.15	3.14	17.1	1	1
s18v1_28426	3614	NA	39930.4	9.05074	high	1.45648	7	DTR_571401	99.34	76.95	NA	NA	0	1
s18v1_28481	2028	NA	184682	1.0981	low	10.7618	7	DTR_408161	59.2	19.11	NA	NA	0	1
s18v1_28651	1201	NA	NA	NA	NA	NA	0	NA	NA	NA	NA	NA	0	1
s18v1_28695	1129	NA	NA	NA	NA	NA	0	NA	NA	NA	NA	NA	0	1
s18v1_28703	1219	NA	44517	2.73828	low	12.2512	1	DTR_492424	37.5	31.05	NA	NA	0	1
s18v1_28801	1686	NA	NA	NA	NA	NA	0	NA	NA	NA	NA	NA	0	1
s18v1_28808	1026	NA	NA	NA	NA	NA	0	NA	NA	NA	NA	NA	0	1
s18v1_28910	1152	NA	NA	NA	NA	NA	0	NA	NA	NA	NA	NA	0	1
s18v1_29082	1588	NA	NA	NA	NA	NA	0	NA	NA	NA	NA	NA	0	1
s18v1_29166	3569	NA	154250	2.31378	high	2.71303	26	DTR_875122	65.7	100	NA	NA	0	1
s18v1_29208	2489	NA	17965	13.8547	low	29.364	1	DTR_734452	27.2	21.64	NA	NA	0	1
s18v1_29240	2170	NA	NA	NA	NA	NA	0	NA	NA	NA	NA	NA	0	1
s18v1_29291	1722	NA	78921	2.18193	medium	6.41143	1	DTR_584646	56.9	52.22	NA	NA	0	1
s18v1_29311	1400	NA	40806.8	3.4308	low	19.0716	2	GCA_002603985.1	30.5	100	NA	NA	0	1
s18v1_29345	4289	NA	39207.3	10.9393	high	4.87642	3	DTR_886516	94.45	32.06	5.18	12.51	1	1
s18v1_29411	1486	NA	NA	NA	NA	NA	0	NA	NA	NA	NA	NA	0	1
s18v1_29518	1246	NA	NA	NA	NA	NA	0	NA	NA	NA	NA	NA	0	1
s18v1_29674	4603	NA	61495.3	7.48513	high	2.34705	4	DTR_466130	95.42	72.16	3.66	12.79	1	1
s18v1_29716	1027	NA	NA	NA	NA	NA	0	NA	NA	NA	NA	NA	0	1
s18v1_29821	1013	NA	NA	NA	NA	NA	0	NA	NA	NA	NA	NA	0	1
s18v1_29877	2747	NA	NA	NA	NA	NA	0	NA	NA	NA	NA	NA	0	1
s18v1_29879	1666	NA	NA	NA	NA	NA	0	NA	NA	NA	NA	NA	0	1
s18v1_29950	1393	NA	40791.6	3.41492	high	4.73858	9	GCA_001736495.1	58.9	100	NA	NA	0	1
s18v1_30017	2095	NA	47250.4	4.43383	high	1.25736	2	DTR_781175	98.5	65.18	NA	NA	0	1
s18v1_30095	1657	NA	NA	NA	NA	NA	0	NA	NA	NA	NA	NA	0	1
s18v1_30227	3728	NA	49973	7.46003	high	4.54555	1	GCA_002745635.1	52.59	70.41	NA	NA	0	1
s18v1_30344	1047	NA	NA	NA	NA	NA	0	NA	NA	NA	NA	NA	0	1
s18v1_30441	3417	NA	51120.8	6.68417	low	21.1303	18	DTR_063986	29.85	42.04	NA	NA	0	1
s18v1_30456	1104	NA	245161	0.450317	medium	9.28435	2	DTR_076116	44	81.19	NA	NA	0	1
s18v1_30517	3192	NA	47050.4	6.78422	high	3.80699	8	DTR_498353	72.12	53.59	1.89385	9.171	2	1
s18v1_30519	1540	NA	NA	NA	NA	NA	0	NA	NA	NA	NA	NA	0	1
s18v1_30589	1880	NA	80175.3	2.34486	high	1.14638	10	DTR_184360	98.13	100	NA	NA	0	1
s18v1_30613	3558	NA	39238	9.06775	high	3.23656	13	DTR_532450	71.04	36.9	NA	NA	0	1
s18v1_30639	29773	NA	205401	14.4951	medium	9.52096	176	DTR_406688	45.85	17.91	NA	NA	0	1
s18v1_30682	1183	NA	203374	0.581688	low	10.2283	21	DTR_249367	46.9	94.46	NA	NA	0	1
s18v1_30686	1000	NA	NA	NA	NA	NA	0	NA	NA	NA	NA	NA	0	1
s18v1_30850	1768	NA	47353	3.73366	medium	6.29534	26	DTR_729875	54.9	53.63	NA	NA	0	1
s18v1_30854	1247	NA	37368	3.33708	high	1.20269	1	DTR_684193	96.1	100	NA	NA	0	1
s18v1_30911	5942	NA	61549.1	9.65408	high	1.21561	6	DTR_435565	91.93	100	7.8831	16.779	6	1
s18v1_31016	4149	NA	160939	2.57799	high	1.25849	9	DTR_403400	97.14	97.63	2.3196	3.06552	2	1
s18v1_31108	2837	NA	NA	NA	NA	NA	0	NA	NA	NA	NA	NA	0	1
s18v1_31171	4002	NA	109023	3.67079	low	11.8741	5	DTR_875676	62.1	21.04	NA	NA	0	1
s18v1_31273	1204	NA	NA	NA	NA	NA	0	NA	NA	NA	NA	NA	0	1
s18v1_31420	15073	NA	34222.8	44.0437	low	21.1705	31	GCA_900093805.1	26	16.49	50.5829	94.5621	5	1
s18v1_31472	1103	NA	NA	NA	NA	NA	0	NA	NA	NA	NA	NA	0	1
s18v1_31595	1425	NA	58090.7	2.45306	low	17.88	2	GCA_002603985.1	29.5	55.28	NA	NA	0	1
s18v1_31649	1827	NA	NA	NA	NA	NA	0	NA	NA	NA	NA	NA	0	1
s18v1_31831	1220	NA	NA	NA	NA	NA	0	NA	NA	NA	NA	NA	0	1
s18v1_32074	1022	NA	NA	NA	NA	NA	0	NA	NA	NA	NA	NA	0	1
s18v1_32184	1232	NA	23707.5	5.19666	low	14.6029	3	DTR_882143	35.2	72.88	NA	NA	0	1
s18v1_32254	1451	NA	NA	NA	NA	NA	0	NA	NA	NA	NA	NA	0	1
s18v1_32302	1203	NA	NA	NA	NA	NA	0	NA	NA	NA	NA	NA	0	1
s18v1_32337	1101	NA	191873	0.573817	low	13.92	4	DTR_268349	36.7	100	NA	NA	0	1
s18v1_32376	2255	NA	NA	NA	NA	NA	0	NA	NA	NA	NA	NA	0	1
s18v1_32417	1463	NA	NA	NA	NA	NA	0	NA	NA	NA	NA	NA	0	1
s18v1_32442	1337	NA	NA	NA	NA	NA	0	NA	NA	NA	NA	NA	0	1
s18v1_32457	3210	NA	172537	1.86047	low	11.5402	8	GCA_000869685.1	34.4	78.34	NA	NA	0	1
s18v1_32612	3139	NA	229960	1.36502	low	12.3258	2	DTR_889549	33.3	64.98	NA	NA	0	1
s18v1_32636	1002	NA	NA	NA	NA	NA	0	NA	NA	NA	NA	NA	0	1
s18v1_32657	5044	NA	47487.3	10.6218	low	12.6105	13	DTR_868016	41.8	41.51	NA	NA	0	1
s18v1_32727	1636	NA	NA	NA	NA	NA	0	NA	NA	NA	NA	NA	0	1
s18v1_32754	1289	NA	NA	NA	NA	NA	0	NA	NA	NA	NA	NA	0	1
s18v1_32811	1278	NA	NA	NA	NA	NA	0	NA	NA	NA	NA	NA	0	1
s18v1_32838	3421	NA	NA	NA	NA	NA	0	NA	NA	NA	NA	NA	0	1
s18v1_32855	1636	NA	NA	NA	NA	NA	0	NA	NA	NA	NA	NA	0	1
s18v1_32862	1047	NA	NA	NA	NA	NA	0	NA	NA	NA	NA	NA	0	1
s18v1_32891	1911	NA	NA	NA	NA	NA	0	NA	NA	NA	NA	NA	0	1
s18v1_32907	1427	NA	NA	NA	NA	NA	0	NA	NA	NA	NA	NA	0	1
s18v1_33039	1484	NA	67429.8	2.20081	medium	9.60051	2	GCA_002745635.1	48.1	38.95	NA	NA	0	1
s18v1_33119	2275	NA	660882	0.344237	medium	9.53752	2	GCA_002625325.1	52.3	87.75	NA	NA	0	1
s18v1_33273	1072	NA	NA	NA	NA	NA	0	NA	NA	NA	NA	NA	0	1
s18v1_33339	1047	NA	NA	NA	NA	NA	0	NA	NA	NA	NA	NA	0	1
s18v1_33401	1085	NA	NA	NA	NA	NA	0	NA	NA	NA	NA	NA	0	1
s18v1_33522	5252	NA	43203	12.1566	low	15.8221	150	DTR_872796	55.5	13.24	18.3904	36.205	2	1
s18v1_33771	1326	NA	NA	NA	NA	NA	0	NA	NA	NA	NA	NA	0	1
s18v1_33802	1099	NA	NA	NA	NA	NA	0	NA	NA	NA	NA	NA	0	1
s18v1_33894	1035	NA	NA	NA	NA	NA	0	NA	NA	NA	NA	NA	0	1
s18v1_33904	1238	NA	NA	NA	NA	NA	0	NA	NA	NA	NA	NA	0	1
s18v1_33957	1017	NA	NA	NA	NA	NA	0	NA	NA	NA	NA	NA	0	1
s18v1_34022	1441	NA	NA	NA	NA	NA	0	NA	NA	NA	NA	NA	0	1
s18v1_34216	1263	NA	NA	NA	NA	NA	0	NA	NA	NA	NA	NA	0	1
s18v1_34353	2361	NA	152437	1.54884	medium	8.20276	12	DTR_419006	51.72	66.67	0.62	5.56	1	1
s18v1_34410	1793	NA	476902	0.375968	medium	9.82267	3	GCA_004379455.1	45.3	43.49	NA	NA	0	1
s18v1_34654	1016	NA	97485	1.04221	low	11.2165	1	DTR_100448	39.4	61.72	NA	NA	0	1
s18v1_34947	1494	NA	94838.8	1.5753	high	2.90887	3	DTR_730611	72.7	100	NA	NA	0	1
s18v1_34952	1120	NA	NA	NA	NA	NA	0	NA	NA	NA	NA	NA	0	1
s18v1_34987	1271	NA	NA	NA	NA	NA	0	NA	NA	NA	NA	NA	0	1
s18v1_35002	1158	NA	NA	NA	NA	NA	0	NA	NA	NA	NA	NA	0	1
s18v1_35053	1826	NA	37525.1	4.86608	low	23.2069	2	DTR_238219	25.3	69.84	NA	NA	0	1
s18v1_35122	1012	NA	NA	NA	NA	NA	0	NA	NA	NA	NA	NA	0	1
s18v1_35138	1278	NA	NA	NA	NA	NA	0	NA	NA	NA	NA	NA	0	1
s18v1_35144	1148	NA	NA	NA	NA	NA	0	NA	NA	NA	NA	NA	0	1
s18v1_35186	1026	NA	35255.2	2.91021	high	1.20269	16	DTR_831685	96.07	100	NA	NA	0	1
s18v1_35208	1388	NA	79660.5	1.74239	high	1.21635	24	DTR_541294	93.4	89.18	NA	NA	0	1
s18v1_35221	1574	NA	NA	NA	NA	NA	0	NA	NA	NA	NA	NA	0	1
s18v1_35246	1224	NA	NA	NA	NA	NA	0	NA	NA	NA	NA	NA	0	1
s18v1_35301	3976	NA	50530.4	7.86853	low	12.4955	125	DTR_708644	32.6	39.39	NA	NA	0	1
s18v1_35322	1014	NA	NA	NA	NA	NA	0	NA	NA	NA	NA	NA	0	1
s18v1_35392	1295	NA	NA	NA	NA	NA	0	NA	NA	NA	NA	NA	0	1
s18v1_35417	1270	NA	NA	NA	NA	NA	0	NA	NA	NA	NA	NA	0	1
s18v1_35662	1202	NA	NA	NA	NA	NA	0	NA	NA	NA	NA	NA	0	1
s18v1_35701	2243	NA	NA	NA	NA	NA	0	NA	NA	NA	NA	NA	0	1
s18v1_35813	1081	NA	39020.9	2.77031	high	2.69321	27	DTR_729061	68.09	71.68	2.13284	3.28473	2	1
s18v1_35829	1316	NA	NA	NA	NA	NA	0	NA	NA	NA	NA	NA	0	1
s18v1_35892	1155	NA	NA	NA	NA	NA	0	NA	NA	NA	NA	NA	0	1
s18v1_35963	6051	NA	160764	3.76391	high	1.25849	9	DTR_625237	93.35	100	4.07	18.46	1	1
s18v1_35984	1217	NA	46127.7	2.63833	medium	5.55941	50	GCA_001503755.1	62.1	68.55	NA	NA	0	1
s18v1_36118	1564	NA	NA	NA	NA	NA	0	NA	NA	NA	NA	NA	0	1
s18v1_36213	2816	NA	NA	NA	NA	NA	0	NA	NA	NA	NA	NA	0	1
s18v1_36347	3744	NA	NA	NA	NA	NA	0	NA	NA	NA	NA	NA	0	1
s18v1_36376	1340	NA	NA	NA	NA	NA	0	NA	NA	NA	NA	NA	0	1
s18v1_36409	3625	NA	NA	NA	NA	NA	0	NA	NA	NA	NA	NA	0	1
s18v1_36463	1387	NA	NA	NA	NA	NA	0	NA	NA	NA	NA	NA	0	1
s18v1_36464	1984	NA	47347.9	4.19026	low	15.7159	5	DTR_730984	30.1	76.96	NA	NA	0	1
s18v1_36473	1115	NA	NA	NA	NA	NA	0	NA	NA	NA	NA	NA	0	1
s18v1_36609	1075	NA	40428	2.65905	low	28.2796	1	DTR_539811	25.4	100	NA	NA	0	1
s18v1_36641	135400	NA	137007	98.8271	high	1.32143	2	DTR_868618	98.06	95.14	77.4117	99.3819	36	1
s18v1_36713	4331	NA	60693	7.13591	low	23.3177	2	GCA_002607345.1	27.6	22.31	NA	NA	0	1
s18v1_36717	1665	NA	174576	0.953739	high	3.27258	1	GCA_002956935.1	57.9	87.91	NA	NA	0	1
s18v1_36741	1465	NA	NA	NA	NA	NA	0	NA	NA	NA	NA	NA	0	1
s18v1_37056	1856	NA	1.22782e+06	0.151162	low	10.766	2	GCA_002924555.1	40.1	88.31	NA	NA	0	1
s18v1_37098	4305	NA	92914.4	4.6333	low	12.6822	5	DTR_242237	24.7	74.68	NA	NA	0	1
s18v1_37138	1377	NA	42027	3.27647	low	13.92	1	GCA_002606525.1	35.9	100	NA	NA	0	1
s18v1_37147	1120	NA	NA	NA	NA	NA	0	NA	NA	NA	NA	NA	0	1
s18v1_37150	2158	NA	38113.8	5.66199	high	3.87941	2	DTR_378146	65.3	65.9	NA	NA	0	1
s18v1_37163	1102	NA	NA	NA	NA	NA	0	NA	NA	NA	NA	NA	0	1
s18v1_37267	3225	NA	34333	9.3933	medium	6.26853	1	DTR_534777	59.5	51.93	NA	NA	0	1
s18v1_37290	1068	NA	56217	1.89978	high	0.0565931	1	DTR_777763	94.1	76.99	NA	NA	0	1
s18v1_37349	1565	NA	NA	NA	NA	NA	0	NA	NA	NA	NA	NA	0	1
s18v1_37461	53636	NA	50669.9	100	high	1.86283	24	DTR_403943	93.61	83.07	63.5063	100	12	1
s18v1_37473	1148	NA	NA	NA	NA	NA	0	NA	NA	NA	NA	NA	0	1
s18v1_37492	1069	NA	NA	NA	NA	NA	0	NA	NA	NA	NA	NA	0	1
s18v1_37566	1070	NA	NA	NA	NA	NA	0	NA	NA	NA	NA	NA	0	1
s18v1_37620	1919	NA	NA	NA	NA	NA	0	NA	NA	NA	NA	NA	0	1
s18v1_37635	49496	NA	46299.2	100	high	2.00678	16	DTR_841274	91.46	82.93	76.2069	100	20	1
s18v1_37650	1423	NA	129219	1.10124	high	1.86457	26	DTR_566791	87.5	100	NA	NA	0	1
s18v1_37693	32504	NA	48144.6	67.5133	high	1.16957	3	DTR_596739	98.58	94.95	53.3256	87.0413	12	1
s18v1_37818	1073	NA	160230	0.669663	medium	5.6679	7	DTR_809862	58.4	60.06	NA	NA	0	1
s18v1_37887	1285	NA	NA	NA	NA	NA	0	NA	NA	NA	NA	NA	0	1
s18v1_37905	1128	NA	NA	NA	NA	NA	0	NA	NA	NA	NA	NA	0	1
s18v1_37921	3206	NA	38636.7	8.29782	high	2.03825	4	DTR_583774	94.34	70.61	5.29	9.09	1	1
s18v1_38186	1198	NA	NA	NA	NA	NA	0	NA	NA	NA	NA	NA	0	1
s18v1_38307	1169	NA	40019.6	2.92107	low	10.6765	12	DTR_416653	44.7	100	NA	NA	0	1
s18v1_38394	1393	NA	33398.4	4.17086	low	28.2796	2	DTR_552382	25.7	100	NA	NA	0	1
s18v1_38428	5120	NA	54696.7	9.36072	high	1.25849	5	DTR_613949	95.53	100	6.69065	14.7609	2	1
s18v1_38615	1161	NA	NA	NA	NA	NA	0	NA	NA	NA	NA	NA	0	1
s18v1_38884	1642	NA	NA	NA	NA	NA	0	NA	NA	NA	NA	NA	0	1
s18v1_38917	9398	NA	101184	9.28802	low	16.1278	178	DTR_279424	46.4	13.76	NA	NA	0	1
s18v1_38972	1473	NA	40581	3.62978	high	0.126792	1	DTR_798355	100	64.48	2.4704	4.67857	3	1
s18v1_39006	2276	NA	44581.4	5.10527	high	1.74788	21	DTR_421599	93.72	78.31	3.69978	7.2061	2	1
s18v1_39068	1363	NA	NA	NA	NA	NA	0	NA	NA	NA	NA	NA	0	1
s18v1_39086	1123	NA	NA	NA	NA	NA	0	NA	NA	NA	NA	NA	0	1
s18v1_39099	2100	NA	205618	1.02131	medium	8.41623	6	DTR_809211	51.4	28.09	NA	NA	0	1
s18v1_39106	1263	NA	NA	NA	NA	NA	0	NA	NA	NA	NA	NA	0	1
s18v1_39113	5583	NA	59105.6	9.4458	high	3.24942	6	DTR_840444	85.98	58.15	4.68091	15.7888	3	1
s18v1_39157	1214	NA	NA	NA	NA	NA	0	NA	NA	NA	NA	NA	0	1
s18v1_39162	1554	NA	NA	NA	NA	NA	0	NA	NA	NA	NA	NA	0	1
s18v1_39205	1094	NA	145815	0.750267	high	4.73858	75	GCA_001500375.1	57.6	100	NA	NA	0	1
s18v1_39339	1460	NA	NA	NA	NA	NA	0	NA	NA	NA	NA	NA	0	1.05
s18v1_39394	1035	NA	NA	NA	NA	NA	0	NA	NA	NA	NA	NA	0	1
s18v1_39439	2297	NA	44395.5	5.17395	high	1.10574	18	DTR_572976	100	96.68	3.38744	7.1685	2	1
s18v1_39716	1099	NA	NA	NA	NA	NA	0	NA	NA	NA	NA	NA	0	1
s18v1_39930	1149	NA	400633	0.286796	high	2.1154	1	DTR_521618	93.2	25.95	NA	NA	0	1
s18v1_39936	1233	NA	160512	0.768167	low	10.6765	13	GCA_002956935.1	42.9	100	NA	NA	0	1
s18v1_39997	1483	NA	NA	NA	NA	NA	0	NA	NA	NA	NA	NA	0	1
s18v1_40045	1098	NA	58035	1.89196	high	2.69321	1	DTR_801600	71.04	68.26	NA	NA	0	1
s18v1_40269	1019	NA	NA	NA	NA	NA	0	NA	NA	NA	NA	NA	0	1
s18v1_40275	1229	NA	NA	NA	NA	NA	0	NA	NA	NA	NA	NA	0	1
s18v1_40277	1885	NA	NA	NA	NA	NA	0	NA	NA	NA	NA	NA	0	1
s18v1_40386	1221	NA	NA	NA	NA	NA	0	NA	NA	NA	NA	NA	0	1
s18v1_40389	1848	NA	NA	NA	NA	NA	0	NA	NA	NA	NA	NA	0	1
s18v1_40393	2024	NA	NA	NA	NA	NA	0	NA	NA	NA	NA	NA	0	1
s18v1_40458	3664	NA	140843	2.60148	low	23.3877	4	DTR_677991	27.1	34.33	NA	NA	0	1
s18v1_40494	1158	NA	NA	NA	NA	NA	0	NA	NA	NA	NA	NA	0	1
s18v1_40611	1125	NA	NA	NA	NA	NA	0	NA	NA	NA	NA	NA	0	1
s18v1_40638	4055	NA	NA	NA	NA	NA	0	NA	NA	NA	NA	NA	0	1
s18v1_40650	1216	NA	NA	NA	NA	NA	0	NA	NA	NA	NA	NA	0	1
s18v1_40658	2090	NA	59870	3.4909	high	1.5206	1	GCA_002616785.1	77.6	100	NA	NA	0	1
s18v1_40721	1075	NA	NA	NA	NA	NA	0	NA	NA	NA	NA	NA	0	1
s18v1_40736	1630	NA	174576	0.933691	low	18.4248	1	GCA_002956935.1	32.5	67.38	NA	NA	0	1
s18v1_40763	1395	NA	NA	NA	NA	NA	0	NA	NA	NA	NA	NA	0	1
s18v1_40766	1141	NA	NA	NA	NA	NA	0	NA	NA	NA	NA	NA	0	1
s18v1_40822	1315	NA	NA	NA	NA	NA	0	NA	NA	NA	NA	NA	0	1
s18v1_40829	1133	NA	44672.2	2.53625	high	0.763683	52	DTR_572976	100	90.7	2.07	3.53	1	1
s18v1_40961	1074	NA	NA	NA	NA	NA	0	NA	NA	NA	NA	NA	0	1
s18v1_41033	1137	NA	44920.5	2.53114	high	1.21635	57	DTR_572976	96.3	90.7	2.08	3.54	1	1
s18v1_41176	3297	NA	38708.4	8.51753	medium	9.82267	4	DTR_682921	44.2	43.51	3.5	8.92	1	1
s18v1_41279	1022	NA	NA	NA	NA	NA	0	NA	NA	NA	NA	NA	0	1
s18v1_41754	4021	NA	253670	1.58513	high	4.44334	2	DTR_419006	50.6	92.33	NA	NA	0	1
s18v1_41974	3166	NA	39534.1	8.00829	high	4.50257	4	DTR_511626	69.2	44.08	NA	NA	0	1
s18v1_42028	1123	NA	NA	NA	NA	NA	0	NA	NA	NA	NA	NA	0	1
s18v1_42074	36484	NA	37632.5	96.9482	high	2.35868	11	DTR_544754	89.57	35.11	64.9891	99.3346	20	1
s18v1_42282	1520	NA	144894	1.04904	low	21.1303	1	DTR_267408	30.1	39.63	NA	NA	0	1
s18v1_42359	1326	NA	NA	NA	NA	NA	0	NA	NA	NA	NA	NA	0	1
s18v1_42389	1215	NA	NA	NA	NA	NA	0	NA	NA	NA	NA	NA	0	1
s18v1_42400	1013	NA	NA	NA	NA	NA	0	NA	NA	NA	NA	NA	0	1
s18v1_42418	1032	NA	NA	NA	NA	NA	0	NA	NA	NA	NA	NA	0	1
s18v1_42613	2266	NA	64714.4	0.968872	high	3.91865	64	DTR_831551	78	43.92	0.83	1.82	1	1
s18v1_42717	1611	NA	NA	NA	NA	NA	0	NA	NA	NA	NA	NA	0	1
s18v1_42799	4020	NA	199912	2.01088	low	10.3162	1	GCA_002608825.1	28.7	43.62	2.1	11.57	1	1
s18v1_43036	4244	NA	80588.2	3.93482	high	1.25849	57	DTR_508130	95.05	100	3.8	7.45	1	1
s18v1_43059	64399	NA	67254.8	95.7537	high	1.48844	17	DTR_387721	68.03	83.36	68.8085	100	13	1
s18v1_43064	1833	NA	NA	NA	NA	NA	0	NA	NA	NA	NA	NA	0	1
s18v1_43339	1460	NA	91471.1	1.59613	low	11.6489	3	GCA_003958705.1	39.6	82.94	NA	NA	0	1
s18v1_43370	1203	NA	NA	NA	NA	NA	0	NA	NA	NA	NA	NA	0	1
s18v1_43409	1693	NA	NA	NA	NA	NA	0	NA	NA	NA	NA	NA	0	1
s18v1_43516	2526	NA	55668.3	4.53759	medium	7.56668	15	GCA_004780845.1	46.3	100	NA	NA	0	1
s18v1_43586	1410	NA	NA	NA	NA	NA	0	NA	NA	NA	NA	NA	0	1
s18v1_43598	1137	NA	NA	NA	NA	NA	0	NA	NA	NA	NA	NA	0	1
s18v1_43702	1798	NA	NA	NA	NA	NA	0	NA	NA	NA	NA	NA	0	1
s18v1_43720	1364	NA	NA	NA	NA	NA	0	NA	NA	NA	NA	NA	0	1
s18v1_43976	1255	NA	NA	NA	NA	NA	0	NA	NA	NA	NA	NA	0	1
s18v1_44035	2028	NA	93305.7	2.1735	high	3.06011	267	DTR_075078	83.7	61.23	NA	NA	0	1
s18v1_44048	1031	NA	NA	NA	NA	NA	0	NA	NA	NA	NA	NA	0	1
s18v1_44055	1031	NA	248138	0.415495	medium	5.68495	3	DTR_785250	58.58	76.8	NA	NA	0	1
s18v1_44340	6456	NA	247557	2.60788	high	2.93728	5	DTR_419006	59.76	100	NA	NA	0	1
s18v1_44383	1108	NA	NA	NA	NA	NA	0	NA	NA	NA	NA	NA	0	1
s18v1_44457	1012	NA	NA	NA	NA	NA	0	NA	NA	NA	NA	NA	0	1
s18v1_44601	1456	NA	277070	0.525499	low	10.5409	2	DTR_254589	54.8	19.38	NA	NA	0	1
s18v1_44777	1400	NA	NA	NA	NA	NA	0	NA	NA	NA	NA	NA	0	1
s18v1_44908	2176	NA	NA	NA	NA	NA	0	NA	NA	NA	NA	NA	0	1
s18v1_45133	1014	NA	NA	NA	NA	NA	0	NA	NA	NA	NA	NA	0	1
s18v1_45235	1121	NA	64469.2	1.73882	low	17.3716	3	GCA_003502125.1	37.1	43.48	NA	NA	0	1
s18v1_45501	2173	NA	77463.3	2.8052	low	15.7159	4	DTR_679966	28.2	72.75	NA	NA	0	1
s18v1_45549	1378	NA	NA	NA	NA	NA	0	NA	NA	NA	NA	NA	0	1
s18v1_45564	2526	NA	38170	6.61776	medium	9.82267	1	DTR_572395	43.9	45.33	NA	NA	0	1
s18v1_45749	1400	NA	NA	NA	NA	NA	0	NA	NA	NA	NA	NA	0	1
s18v1_45768	1255	NA	104748	1.19811	low	11.4281	40	DTR_075947	38	100	NA	NA	0	1
s18v1_45788	1140	NA	NA	NA	NA	NA	0	NA	NA	NA	NA	NA	0	1
s18v1_45858	1125	NA	NA	NA	NA	NA	0	NA	NA	NA	NA	NA	0	1
s18v1_45913	3700	NA	NA	NA	NA	NA	0	NA	NA	NA	NA	NA	0	1
s18v1_45931	1852	NA	474688	0.390151	high	4.66263	3	GCA_004379455.1	64.6	49.01	NA	NA	0	1
s18v1_45969	1142	NA	NA	NA	NA	NA	0	NA	NA	NA	NA	NA	0	1
s18v1_45975	1450	NA	NA	NA	NA	NA	0	NA	NA	NA	NA	NA	0	1
s18v1_46254	3055	NA	33198.8	9.20215	high	1.14638	16	DTR_416653	99.78	100	6.31244	11.9553	3	1
s18v1_46448	1361	NA	NA	NA	NA	NA	0	NA	NA	NA	NA	NA	0	1
s18v1_46529	1348	NA	NA	NA	NA	NA	0	NA	NA	NA	NA	NA	0	1
s18v1_46694	3485	NA	NA	NA	NA	NA	0	NA	NA	NA	NA	NA	0	1
s18v1_46891	3142	NA	180691	1.73888	high	2.20484	1	DTR_453772	97.1	34.62	NA	NA	0	1
s18v1_46964	1051	NA	189075	0.555863	high	2.61867	3	DTR_374012	78.6	59.28	NA	NA	0	1
s18v1_47267	2360	NA	497513	0.474359	low	NA	1	GCA_000917535.1	21.4	51.81	NA	NA	0	1
s18v1_47314	1888	NA	204061	0.925214	low	11.9201	10	DTR_202280	28.7	100	NA	NA	0	1
s18v1_47343	4223	NA	80588.1	3.90876	high	1.48248	57	DTR_682980	99.83	100	3.77	7.4	1	1
s18v1_47401	1008	NA	NA	NA	NA	NA	0	NA	NA	NA	NA	NA	0	1
s18v1_47449	5367	NA	NA	NA	NA	NA	0	NA	NA	NA	NA	NA	0	1
s18v1_47619	1281	NA	NA	NA	NA	NA	0	NA	NA	NA	NA	NA	0	1
s18v1_47636	1409	NA	NA	NA	NA	NA	0	NA	NA	NA	NA	NA	0	1
s18v1_47754	1044	NA	NA	NA	NA	NA	0	NA	NA	NA	NA	NA	0	1
s18v1_47935	2920	NA	NA	NA	NA	NA	0	NA	NA	NA	NA	NA	0	1
s18v1_48012	2633	NA	NA	NA	NA	NA	0	NA	NA	NA	NA	NA	0	1
s18v1_48025	1513	NA	134155	1.1278	medium	8.47686	3	DTR_208058	38.5	100	NA	NA	0	1
s18v1_48298	1313	NA	NA	NA	NA	NA	0	NA	NA	NA	NA	NA	0	1
s18v1_48547	1267	NA	NA	NA	NA	NA	0	NA	NA	NA	NA	NA	0	1
s18v1_48596	1260	NA	37742.2	3.33844	high	1.86457	46	DTR_408595	86.85	100	1.80101	3.79003	2	1
s18v1_48665	1025	NA	NA	NA	NA	NA	0	NA	NA	NA	NA	NA	0	1
s18v1_48693	3400	NA	NA	NA	NA	NA	0	NA	NA	NA	NA	NA	0	1
s18v1_48752	9446	NA	56221.5	16.8014	low	11.1418	381	DTR_603561	60.97	13.37	NA	NA	0	1
s18v1_48870	1058	NA	36854.9	2.87072	low	19.0716	2	DTR_879615	30.2	100	NA	NA	0	1
s18v1_48873	1322	NA	NA	NA	NA	NA	0	NA	NA	NA	NA	NA	0	1
s18v1_48900	1806	NA	NA	NA	NA	NA	0	NA	NA	NA	NA	NA	0	1
s18v1_49029	1923	NA	NA	NA	NA	NA	0	NA	NA	NA	NA	NA	0	1
s18v1_49193	1573	NA	NA	NA	NA	NA	0	NA	NA	NA	NA	NA	0	1
s18v1_49278	4156	NA	NA	NA	NA	NA	0	NA	NA	NA	NA	NA	0	1
s18v1_49320	1287	NA	NA	NA	NA	NA	0	NA	NA	NA	NA	NA	0	1
s18v1_49343	3874	NA	NA	NA	NA	NA	0	NA	NA	NA	NA	NA	0	1
s18v1_49380	2245	NA	37774	5.94324	high	1.61005	1	DTR_745228	88.28	100	NA	NA	0	1
s18v1_49386	1550	NA	NA	NA	NA	NA	0	NA	NA	NA	NA	NA	0	1
s18v1_49507	1468	NA	58319.9	2.51715	high	1.1309	7	DTR_594784	100	100	NA	NA	0	1
s18v1_49711	1680	NA	32910.5	5.10476	high	1.61047	4	DTR_768125	99.26	70.38	NA	NA	0	1
s18v1_49730	1308	NA	362773	0.360556	low	17.3716	2	DTR_352881	32.9	47.22	NA	NA	0	1
s18v1_49743	1466	NA	NA	NA	NA	NA	0	NA	NA	NA	NA	NA	0	1
s18v1_49777	1216	NA	NA	NA	NA	NA	0	NA	NA	NA	NA	NA	0	1
s18v1_49781	91647	NA	93162.7	98.3731	high	1.11873	2	DTR_576469	95.15	98.78	64.857	100	10	1
s18v1_50052	1210	NA	111441	1.08577	low	14.6029	6	DTR_377948	32.7	73.56	NA	NA	0	1
s18v1_50071	1078	NA	NA	NA	NA	NA	0	NA	NA	NA	NA	NA	0	1
s18v1_50201	1326	NA	NA	NA	NA	NA	0	NA	NA	NA	NA	NA	0	1
s18v1_50249	1878	NA	NA	NA	NA	NA	0	NA	NA	NA	NA	NA	0	1
s18v1_50262	1485	NA	NA	NA	NA	NA	0	NA	NA	NA	NA	NA	0	1
s18v1_50289	2058	NA	647605	0.317786	high	3.65868	32	GCA_000889515.1	70.8	100	0.17	1.03	1	1
s18v1_50335	2362	NA	64694.8	3.65099	low	15.5486	54	DTR_110467	45	22.91	NA	NA	0	1
s18v1_50401	1501	NA	NA	NA	NA	NA	0	NA	NA	NA	NA	NA	0	1
s18v1_50403	3106	NA	NA	NA	NA	NA	0	NA	NA	NA	NA	NA	0	1
s18v1_50404	1157	NA	NA	NA	NA	NA	0	NA	NA	NA	NA	NA	0	1
s18v1_50434	2345	NA	NA	NA	NA	NA	0	NA	NA	NA	NA	NA	0	1
s18v1_50505	4599	NA	253099	1.81708	medium	9.41844	3	DTR_097817	30.7	64.7	NA	NA	0	1
s18v1_50513	1128	NA	NA	NA	NA	NA	0	NA	NA	NA	NA	NA	0	1
s18v1_50533	1391	NA	NA	NA	NA	NA	0	NA	NA	NA	NA	NA	0	1
s18v1_50657	1156	NA	NA	NA	NA	NA	0	NA	NA	NA	NA	NA	0	1
s18v1_50670	5248	NA	68631.8	7.64661	low	14.8948	290	DTR_179860	49.5	20.02	NA	NA	0	1
s18v1_50703	1596	NA	11873.5	13.4417	medium	9.5128	4	DTR_237573	36.9	100	NA	NA	0	1
s18v1_50758	1498	NA	NA	NA	NA	NA	0	NA	NA	NA	NA	NA	0	1
s18v1_50801	1790	NA	NA	NA	NA	NA	0	NA	NA	NA	NA	NA	0	1
s18v1_50811	2005	NA	182031	1.10146	medium	6.32319	27	DTR_223922	55.1	60.28	NA	NA	0	1
s18v1_51020	1648	NA	44611.9	3.69408	high	3.80699	16	DTR_731154	69.09	55.8	NA	NA	0	1
s18v1_51031	1899	NA	NA	NA	NA	NA	0	NA	NA	NA	NA	NA	0	1
s18v1_51051	1199	NA	NA	NA	NA	NA	0	NA	NA	NA	NA	NA	0	1
s18v1_51258	3947	NA	40151.7	5.36964	high	4.80727	2	DTR_569936	53.56	65.62	2.64714	6.05276	2	1
s18v1_51303	3524	NA	117319	3.00378	high	2.8445	10	DTR_539559	74.1	58	NA	NA	0	1
s18v1_51373	10825	NA	55136.7	19.633	low	17.4786	54	DTR_595010	33.7	20.03	NA	NA	0	1
s18v1_51377	2230	NA	44873.6	4.96952	high	1.56971	20	DTR_525461	95.8	100	NA	NA	0	1
s18v1_51451	1236	NA	NA	NA	NA	NA	0	NA	NA	NA	NA	NA	0	1
s18v1_51589	1252	NA	NA	NA	NA	NA	0	NA	NA	NA	NA	NA	0	1
s18v1_51606	4393	NA	NA	NA	NA	NA	0	NA	NA	NA	NA	NA	0	1
s18v1_51810	1293	NA	NA	NA	NA	NA	0	NA	NA	NA	NA	NA	0	1
s18v1_51851	1016	NA	NA	NA	NA	NA	0	NA	NA	NA	NA	NA	0	1
s18v1_51861	2315	NA	NA	NA	NA	NA	0	NA	NA	NA	NA	NA	0	1
s18v1_51919	1162	NA	NA	NA	NA	NA	0	NA	NA	NA	NA	NA	0	1
s18v1_52027	1320	NA	NA	NA	NA	NA	0	NA	NA	NA	NA	NA	0	1
s18v1_52042	1110	NA	NA	NA	NA	NA	0	NA	NA	NA	NA	NA	0	1
s18v1_52090	3692	NA	79518.7	4.64293	high	1.28739	14	DTR_737615	99.31	94.36	NA	NA	0	1
s18v1_52145	1011	NA	NA	NA	NA	NA	0	NA	NA	NA	NA	NA	0	1
s18v1_52162	2564	NA	76787.3	3.33909	medium	9.4331	5	DTR_642962	52.2	84.92	NA	NA	0	1
s18v1_52221	1068	NA	67195	1.5894	low	11.4281	1	GCA_002610805.1	41.5	100	NA	NA	0	1
s18v1_52303	5444	NA	229974	2.36722	low	14.6912	2	DTR_889549	34.2	35.66	NA	NA	0	1
s18v1_52324	1029	NA	56675.3	1.81561	high	1.1309	2	DTR_801600	99	100	NA	NA	0	1
s18v1_52442	1578	NA	NA	NA	NA	NA	0	NA	NA	NA	NA	NA	0	1
s18v1_52520	1172	NA	52763.6	2.22123	low	11.4281	2	DTR_740305	38.8	77.56	NA	NA	0	1
s18v1_52665	1173	NA	NA	NA	NA	NA	0	NA	NA	NA	NA	NA	0	1
s18v1_52783	1500	NA	NA	NA	NA	NA	0	NA	NA	NA	NA	NA	0	1
s18v1_52886	1643	NA	NA	NA	NA	NA	0	NA	NA	NA	NA	NA	0	1
s18v1_52961	2034	NA	NA	NA	NA	NA	0	NA	NA	NA	NA	NA	0	1
s18v1_52966	1132	NA	NA	NA	NA	NA	0	NA	NA	NA	NA	NA	0	1
s18v1_53056	1289	NA	NA	NA	NA	NA	0	NA	NA	NA	NA	NA	0	1
s18v1_53060	4531	NA	48729	9.29836	low	12.6105	300	DTR_095450	42.3	40.45	NA	NA	0	1
s18v1_53141	1343	NA	NA	NA	NA	NA	0	NA	NA	NA	NA	NA	0	1
s18v1_53325	1892	NA	80518.8	2.34976	high	1.14638	5	DTR_541294	99.03	100	1.61597	4.22722	2	1
s18v1_53391	2582	NA	NA	NA	NA	NA	0	NA	NA	NA	NA	NA	0	1
s18v1_53451	1017	NA	NA	NA	NA	NA	0	NA	NA	NA	NA	NA	0	1
s18v1_53460	1169	NA	NA	NA	NA	NA	0	NA	NA	NA	NA	NA	0	1
s18v1_53594	1458	NA	NA	NA	NA	NA	0	NA	NA	NA	NA	NA	0	1
s18v1_53735	3252	NA	60674.9	5.35971	high	1.53917	4	DTR_799127	88.8	86.24	NA	NA	0	1
s18v1_53829	5157	NA	59622.9	8.64936	medium	9.04974	233	DTR_379569	35.9	45.93	NA	NA	0	1
s18v1_53945	4575	NA	NA	NA	NA	NA	0	NA	NA	NA	NA	NA	0	1
s18v1_53976	1995	NA	48651.7	4.10057	high	1.34465	10	DTR_565238	96.1	91.16	NA	NA	0	1
s18v1_54067	2397	NA	23652.4	10.1343	low	12.9831	17	GCA_003655805.1	36.9	61.15	7.91154	16.53	2	1
s18v1_54089	2085	NA	174576	1.19432	medium	9.9712	1	GCA_002956935.1	47.11	64.63	NA	NA	0	1
s18v1_54379	1335	NA	101959	1.30935	high	0.0565611	20	DTR_571480	100	53.98	1.21	3.9	1	1
s18v1_54380	3435	NA	NA	NA	NA	NA	0	NA	NA	NA	NA	NA	0	1
s18v1_54525	3899	NA	NA	NA	NA	NA	0	NA	NA	NA	3.35	7.75	1	1
s18v1_54535	2476	NA	129433	1.91296	high	4.93937	92	DTR_386322	50.9	51.03	NA	NA	0	1
s18v1_54644	1551	NA	NA	NA	NA	NA	0	NA	NA	NA	NA	NA	0	1
s18v1_54661	1146	NA	32897.6	3.48354	high	0.763683	2	DTR_838750	97.64	90.67	NA	NA	0	1
s18v1_54700	1015	NA	NA	NA	NA	NA	0	NA	NA	NA	NA	NA	0	1
s18v1_54726	1393	NA	NA	NA	NA	NA	0	NA	NA	NA	NA	NA	0	1
s18v1_54752	1005	NA	198853	0.505398	low	17.3716	15	DTR_022094	35.3	46.53	NA	NA	0	1
s18v1_54757	1000	NA	NA	NA	NA	NA	0	NA	NA	NA	NA	NA	0	1
s18v1_54763	1240	NA	NA	NA	NA	NA	0	NA	NA	NA	NA	NA	0	1
s18v1_54804	1105	NA	NA	NA	NA	NA	0	NA	NA	NA	NA	NA	0	1
s18v1_54991	1453	NA	NA	NA	NA	NA	0	NA	NA	NA	NA	NA	0	1
s18v1_55110	1846	NA	83558.8	2.20922	medium	9.5128	74	DTR_386337	37.36	100	NA	NA	0	1
s18v1_55175	1775	NA	NA	NA	NA	NA	0	NA	NA	NA	NA	NA	0	1
s18v1_55350	4027	NA	239423	1.68196	medium	8.79474	9	DTR_196605	34.9	57.34	NA	NA	0	1
s18v1_55376	1056	NA	NA	NA	NA	NA	0	NA	NA	NA	NA	NA	0	1
s18v1_55388	1500	NA	NA	NA	NA	NA	0	NA	NA	NA	NA	NA	0	1
s18v1_55543	1510	NA	167663	0.900616	high	1.71253	22	DTR_567427	89.7	72	NA	NA	0	1
s18v1_55724	1096	NA	NA	NA	NA	NA	0	NA	NA	NA	NA	NA	0	1
s18v1_55730	3473	NA	NA	NA	NA	NA	0	NA	NA	NA	NA	NA	0	1
s18v1_55733	1589	NA	NA	NA	NA	NA	0	NA	NA	NA	NA	NA	0	1
s18v1_55740	1182	NA	NA	NA	NA	NA	0	NA	NA	NA	NA	NA	0	1
s18v1_55753	4613	NA	NA	NA	NA	NA	0	NA	NA	NA	2.13	7.72	1	1
s18v1_55765	1468	NA	NA	NA	NA	NA	0	NA	NA	NA	NA	NA	0	1
s18v1_55825	3128	NA	47645.4	6.56517	medium	6.32319	14	DTR_570213	54.3	62.29	NA	NA	0	1
s18v1_55870	1106	NA	NA	NA	NA	NA	0	NA	NA	NA	NA	NA	0	1
s18v1_55885	4703	NA	332192	1.41575	low	25.439	5	GCA_000873685.1	39.1	15.08	NA	NA	0	1
s18v1_55904	6026	NA	NA	NA	NA	NA	0	NA	NA	NA	NA	NA	0	1
s18v1_55915	4751	NA	NA	NA	NA	NA	0	NA	NA	NA	NA	NA	0	1
s18v1_55965	6787	NA	123063	5.51504	low	24.9336	19	DTR_248634	25.5	16.57	NA	NA	0	1
s18v1_55969	10646	NA	48234.4	22.0714	high	2.26323	3	DTR_596739	95.97	63.65	18.2563	30.1352	3	1
s18v1_56144	1546	NA	38306	4.03592	high	3.06755	1	DTR_785250	78.13	58.44	NA	NA	0	1
s18v1_56179	1301	NA	NA	NA	NA	NA	0	NA	NA	NA	NA	NA	0	1
s18v1_56252	2093	NA	NA	NA	NA	NA	0	NA	NA	NA	NA	NA	0	1
s18v1_56348	2031	NA	NA	NA	NA	NA	0	NA	NA	NA	NA	NA	0	1
s18v1_56504	1333	NA	48800	2.73156	high	4.12714	1	GCA_000916975.1	67.5	77.86	NA	NA	0	1
s18v1_56512	1176	NA	NA	NA	NA	NA	0	NA	NA	NA	4.13711	8.08659	2	1
s18v1_56529	1990	NA	NA	NA	NA	NA	0	NA	NA	NA	NA	NA	0	1
s18v1_56701	1769	NA	NA	NA	NA	NA	0	NA	NA	NA	NA	NA	0	1
s18v1_56755	1671	NA	NA	NA	NA	NA	0	NA	NA	NA	NA	NA	0	1
s18v1_56773	1533	NA	229756	0.667229	low	18.8069	2	DTR_285751	29.5	58.1	NA	NA	0	1
s18v1_56915	3173	NA	134817	2.35356	low	13.7748	9	GCA_000916135.1	53.1	15.18	NA	NA	0	1
s18v1_56986	1025	NA	NA	NA	NA	NA	0	NA	NA	NA	NA	NA	0	1
s18v1_57017	1045	NA	NA	NA	NA	NA	0	NA	NA	NA	NA	NA	0	1
[truncated: 8,428 more rows]
