# Supplementary material for: Comparison of PCR versus PCR-Free DNA Library Preparation for Characterising the Human Faecal Virome
Source: Viruses. 2021 Oct 18;13(10):2093. doi: 10.3390/v13102093 (PMC8537689; doi:10.3390/v13102093)
Supplement: Supplementary file 1 [file viruses-13-02093-s001.zip › supplementary material/TableS7.xlsx]

## Sheet: Abundance count
contig	s18v1	s18v2	s18v3	s18v1_PF	s18v2_PF	s18v3_PF	Only present in either PCR or PCR-free
s18v1_34952	4	0	0	0	0	0	PCR
s18v1_37650	3	0	0	0	0	0	PCR
s18v1_40650	9	0	0	0	0	0	PCR
s18v1_67344	5	0	0	0	0	0	PCR
s18v1_70997	7	0	0	0	0	0	PCR
s18v2_14035	0	3	0	0	0	0	pcr
s18v2_76364	1	3	0	0	0	0	pcr
s18v3_11813	0	0	3	0	0	0	pcr
s18v3_14924	0	0	3	0	0	0	pcr
s18v3_29066	0	0	3	0	0	0	pcr
s18v1-PF_20012	0	0	0	3	0	0	PCR-free
s18v1-PF_44955	0	0	0	19	0	0	PCR-free
s18v1-PF_51405	0	0	0	2	3	0	PCR-free
s18v1-PF_63843	0	0	0	7	0	0	PCR-free
s18v1-PF_91176	0	0	0	5	0	0	PCR-free
s18v2-PF_113048	0	0	0	0	7	7	PCR-free
s18v2-PF_115205	0	0	0	1	6	0	PCR-free
s18v2-PF_116292	0	0	0	0	7	0	PCR-free
s18v2-PF_11926	0	0	0	2	3	0	PCR-free
s18v2-PF_127201	0	0	0	0	6	4	PCR-free
s18v2-PF_36365	0	0	0	0	5	0	PCR-free
s18v2-PF_4006	0	0	0	0	4	0	PCR-free
s18v2-PF_4337	0	0	0	0	3	0	PCR-free
s18v2-PF_51393	0	0	0	0	4	116	PCR-free
s18v2-PF_71633	0	0	0	0	6	0	PCR-free
s18v2-PF_79243	0	0	0	1	4	0	PCR-free
s18v2-PF_85385	0	0	0	0	4	2	PCR-free
s18v2-PF_95212	0	0	0	1	5	0	PCR-free
s18v3-PF_10620	0	0	0	0	1	7	PCR-free
s18v3-PF_10894	0	0	0	0	3	5	PCR-free
s18v3-PF_11808	0	0	0	0	0	5	PCR-free
s18v3-PF_12099	0	0	0	0	2	4	PCR-free
s18v3-PF_1396	0	0	0	0	0	7	PCR-free
s18v3-PF_15721	0	0	0	0	0	4	PCR-free
s18v3-PF_15978	0	0	0	0	0	4	PCR-free
s18v3-PF_18467	0	0	0	0	4	4	PCR-free
s18v3-PF_19772	0	0	0	0	3	4	PCR-free
s18v3-PF_19919	0	0	0	0	3	7	PCR-free
s18v3-PF_20768	0	0	0	0	0	13	PCR-free
s18v3-PF_2245	0	0	0	0	0	3	PCR-free
s18v3-PF_24356	0	0	0	0	0	5	PCR-free
s18v3-PF_24704	0	0	0	0	5	5	PCR-free
s18v3-PF_24948	0	0	0	0	0	13	PCR-free
s18v3-PF_261	0	0	0	0	2	4	PCR-free
s18v3-PF_26225	0	0	0	0	1	5	PCR-free
s18v3-PF_26610	0	0	0	0	1	4	PCR-free
s18v3-PF_2690	0	0	0	0	1	8	PCR-free
s18v3-PF_26976	0	0	0	0	0	5	PCR-free
s18v3-PF_28121	0	0	0	0	0	5	PCR-free
s18v3-PF_2823	0	0	0	0	5	9	PCR-free
s18v3-PF_28591	0	0	0	0	2	4	PCR-free
s18v3-PF_28706	0	0	0	0	0	4	PCR-free
s18v3-PF_2901	0	0	0	0	0	5	PCR-free
s18v3-PF_30665	0	0	0	0	0	7	PCR-free
s18v3-PF_33613	0	0	0	0	0	4	PCR-free
s18v3-PF_35167	0	0	0	0	0	11	PCR-free
s18v3-PF_35739	0	0	0	0	0	4	PCR-free
s18v3-PF_35927	0	0	0	0	0	4	PCR-free
s18v3-PF_37522	0	0	0	0	0	6	PCR-free
s18v3-PF_3893	0	0	0	0	0	10	PCR-free
s18v3-PF_40147	0	0	0	0	0	7	PCR-free
s18v3-PF_41789	0	0	0	0	0	4	PCR-free
s18v3-PF_42165	0	0	0	0	3	7	PCR-free
s18v3-PF_43027	0	0	0	0	0	3	PCR-free
s18v3-PF_43294	0	0	0	0	0	6	PCR-free
s18v3-PF_45229	0	0	0	0	0	4	PCR-free
s18v3-PF_45713	0	0	0	0	0	4	PCR-free
s18v3-PF_4586	0	0	0	0	1	6	PCR-free
s18v3-PF_4647	0	0	0	0	0	6	PCR-free
s18v3-PF_47416	0	0	0	0	0	13	PCR-free
s18v3-PF_47939	0	0	0	0	10	13	PCR-free
s18v3-PF_6277	0	0	0	0	1	21	PCR-free
s18v3-PF_7678	0	0	0	0	3	4	PCR-free
s18v3-PF_7809	0	0	0	0	0	9	PCR-free
s18v3-PF_9940	0	0	0	0	0	6	PCR-free
s18v1-PF_100046	8	0	0	9	0	0	Both
s18v1-PF_100075	13	0	0	16	0	0	Both
s18v1-PF_100201	3	0	0	4	0	0	Both
s18v1-PF_100222	3	24	13	7	41	25	Both
s18v1-PF_100286	165	0	0	183	0	0	Both
s18v1-PF_100343	4	0	0	5	0	0	Both
s18v1-PF_100357	60	632	9	68	372	8	Both
s18v1-PF_100378	28	0	0	33	0	0	Both
s18v1-PF_100379	28	294	0	33	178	0	Both
s18v1-PF_100381	11	0	0	11	0	0	Both
s18v1-PF_100382	23	0	0	24	0	0	Both
s18v1-PF_100383	20	196	0	22	119	0	Both
s18v1-PF_100384	7	68	0	8	40	0	Both
s18v1-PF_100385	33	0	0	36	0	0	Both
s18v1-PF_100387	15	149	0	19	88	0	Both
s18v1-PF_100388	35	459	0	46	263	0	Both
s18v1-PF_100390	30	0	0	34	0	0	Both
s18v1-PF_100392	50	0	0	52	0	0	Both
s18v1-PF_100394	6	63	0	8	38	0	Both
s18v1-PF_10051	5	1	0	9	4	0	Both
s18v1-PF_10067	315	0	0	351	0	0	Both
s18v1-PF_10103	1	0	0	3	0	0	Both
s18v1-PF_10155	1	1	0	7	2	0	Both
s18v1-PF_1021	2	17	0	6	27	0	Both
s18v1-PF_10271	4	0	0	8	0	1	Both
s18v1-PF_10284	5	18	133	5	56	209	Both
s18v1-PF_10287	3	28	133	9	48	240	Both
s18v1-PF_10371	4	0	0	5	0	0	Both
s18v1-PF_10373	3	0	1	4	0	3	Both
s18v1-PF_10379	3	0	0	3	0	0	Both
s18v1-PF_10535	17	1	1	18	0	1	Both
s18v1-PF_10559	4	0	0	4	1	1	Both
s18v1-PF_10652	3	0	0	5	0	0	Both
s18v1-PF_1070	4	0	0	4	0	0	Both
s18v1-PF_10778	3	14	17	6	42	26	Both
s18v1-PF_10850	4	18	179	4	31	302	Both
s18v1-PF_10967	3	9	1	7	22	2	Both
s18v1-PF_10976	7	48	84	12	73	134	Both
s18v1-PF_10983	3	8	1	3	7	1	Both
s18v1-PF_11090	4	25	34	9	52	67	Both
s18v1-PF_11092	6	6	7	7	4	5	Both
s18v1-PF_11096	6	33	57	9	47	100	Both
s18v1-PF_11155	4	25	147	11	55	273	Both
s18v1-PF_11178	2	0	0	3	0	0	Both
s18v1-PF_11264	1	5	0	2	12	0	Both
s18v1-PF_11364	1	16	0	5	21	0	Both
s18v1-PF_11367	5	32	6	7	36	10	Both
s18v1-PF_11588	1	9	89	6	25	152	Both
s18v1-PF_11647	8	2	1	11	4	1	Both
s18v1-PF_11701	4	0	2	8	0	6	Both
s18v1-PF_11707	6	34	36	13	79	64	Both
s18v1-PF_11733	29	0	0	32	0	0	Both
s18v1-PF_11758	8	17	0	9	12	0	Both
s18v1-PF_11785	6	0	0	8	0	0	Both
s18v1-PF_11865	2	5	0	7	10	1	Both
s18v1-PF_11871	2	0	0	3	0	0	Both
s18v1-PF_11895	18	0	3	20	0	2	Both
s18v1-PF_11941	5	13	0	8	9	2	Both
s18v1-PF_11989	4	1	0	3	1	0	Both
s18v1-PF_12024	2	0	0	2	0	0	Both
s18v1-PF_12034	43	452	0	53	279	0	Both
s18v1-PF_1212	1	15	22	7	35	48	Both
s18v1-PF_12147	5	0	0	7	0	1	Both
s18v1-PF_1223	1	0	0	3	0	0	Both
s18v1-PF_12271	5	30	41	11	59	51	Both
s18v1-PF_12324	1	3	0	3	5	0	Both
s18v1-PF_12351	2	0	1	4	0	2	Both
s18v1-PF_12405	1	24	0	6	15	0	Both
s18v1-PF_12446	6	33	41	12	72	65	Both
s18v1-PF_1261	6	44	85	16	73	127	Both
s18v1-PF_12678	4	42	0	5	24	0	Both
s18v1-PF_12764	4	0	2	5	0	3	Both
s18v1-PF_12934	1034	0	0	1161	0	0	Both
s18v1-PF_12959	4	42	184	15	76	368	Both
s18v1-PF_1308	2	105	0	15	80	0	Both
s18v1-PF_13172	8	1	0	14	2	0	Both
s18v1-PF_13258	3	23	6	6	39	17	Both
s18v1-PF_13295	2	1	0	3	0	0	Both
s18v1-PF_13340	9	0	1	14	0	3	Both
s18v1-PF_13362	2	1	0	4	3	0	Both
s18v1-PF_13424	2	11	0	5	25	1	Both
s18v1-PF_13512	3	0	0	6	0	0	Both
s18v1-PF_13554	2	18	167	5	31	218	Both
s18v1-PF_13647	5	25	93	10	55	127	Both
s18v1-PF_13686	20	0	2	25	1	4	Both
s18v1-PF_13704	5	0	1	6	0	1	Both
s18v1-PF_13727	4	0	1	5	0	2	Both
s18v1-PF_13959	26	176	166	45	219	243	Both
s18v1-PF_14153	25	0	0	30	0	0	Both
s18v1-PF_14204	2	0	2	4	0	2	Both
s18v1-PF_14214	4	2	0	12	3	0	Both
s18v1-PF_1432	3	0	0	4	0	0	Both
s18v1-PF_14595	28	0	0	31	0	0	Both
s18v1-PF_14710	7	0	0	8	0	0	Both
s18v1-PF_1472	2	17	2	7	37	4	Both
s18v1-PF_14996	4	3	0	8	7	0	Both
s18v1-PF_15138	2	1	0	5	0	0	Both
s18v1-PF_15141	4	31	19	9	49	28	Both
s18v1-PF_15303	2	3	1	4	7	2	Both
s18v1-PF_15332	2	5	46	5	15	77	Both
s18v1-PF_15377	3	0	2	5	1	2	Both
s18v1-PF_15611	3	1	0	4	2	0	Both
s18v1-PF_15620	3	0	0	5	0	0	Both
s18v1-PF_15625	4	19	0	5	34	0	Both
s18v1-PF_15669	43	318	5	49	217	5	Both
s18v1-PF_1569	2	0	0	4	1	0	Both
s18v1-PF_15777	1	10	1	4	23	5	Both
s18v1-PF_15909	13	7	1	16	4	0	Both
s18v1-PF_15947	2	13	0	4	23	0	Both
s18v1-PF_16043	5	34	34	12	54	55	Both
s18v1-PF_16120	1	13	0	5	27	0	Both
s18v1-PF_16257	2	1	0	4	1	0	Both
s18v1-PF_1630	1	0	1	36	1	0	Both
s18v1-PF_16348	68	381	0	80	234	0	Both
s18v1-PF_16350	2	16	0	7	34	0	Both
s18v1-PF_16375	4	0	0	6	0	0	Both
s18v1-PF_16412	41	7	2	69	12	2	Both
s18v1-PF_16620	2	11	1	7	19	1	Both
s18v1-PF_16720	7	41	1134	8	57	878	Both
s18v1-PF_1687	9	50	4	17	104	8	Both
s18v1-PF_16911	1	10	0	4	26	0	Both
s18v1-PF_17064	6	45	1	11	67	2	Both
s18v1-PF_17075	4	31	128	11	58	237	Both
s18v1-PF_17233	4	27	29	10	51	41	Both
s18v1-PF_17318	2	18	35	8	33	65	Both
s18v1-PF_1736	0	3	0	3	3	0	Both
s18v1-PF_17411	1	3	0	3	8	0	Both
s18v1-PF_17802	1058	10269	1	1248	6340	3	Both
s18v1-PF_17894	2	0	0	6	0	1	Both
s18v1-PF_1791	12	0	0	17	0	0	Both
s18v1-PF_17987	4	0	0	9	0	1	Both
s18v1-PF_18066	2	0	0	4	0	0	Both
s18v1-PF_18240	6	0	0	7	0	0	Both
s18v1-PF_18326	3	0	1	4	1	1	Both
s18v1-PF_1843	5	0	5	4	0	2	Both
s18v1-PF_1845	2	13	17	4	20	18	Both
s18v1-PF_18478	73	0	0	85	0	0	Both
s18v1-PF_18522	5	28	19	11	57	28	Both
s18v1-PF_18529	1	3	0	2	7	0	Both
s18v1-PF_18568	3	10	42	4	20	69	Both
s18v1-PF_18595	5	37	1	10	59	2	Both
s18v1-PF_1861	3	0	0	3	0	0	Both
s18v1-PF_18737	8	0	1	12	0	2	Both
s18v1-PF_18750	2	0	0	4	0	0	Both
s18v1-PF_18769	5	28	3	8	54	5	Both
s18v1-PF_18826	5	0	0	6	1	0	Both
s18v1-PF_18832	3	19	28	9	38	50	Both
s18v1-PF_18867	7	27	0	9	19	0	Both
s18v1-PF_18988	3	17	83	8	34	148	Both
s18v1-PF_18993	3	0	0	3	0	0	Both
s18v1-PF_190	2	18	0	6	28	0	Both
s18v1-PF_19008	6	4	25	10	5	20	Both
s18v1-PF_19019	3	0	0	4	0	0	Both
s18v1-PF_19070	4	20	0	8	41	2	Both
s18v1-PF_1908	5	47	0	9	51	0	Both
s18v1-PF_19165	4	24	5	6	34	12	Both
s18v1-PF_19206	3	17	151	9	39	275	Both
s18v1-PF_19341	2	15	21	11	46	29	Both
s18v1-PF_19478	1	11	3	5	19	10	Both
s18v1-PF_19618	0	6	0	1	11	0	Both
s18v1-PF_19628	2	0	1	4	0	1	Both
s18v1-PF_19725	1	0	0	5	0	0	Both
s18v1-PF_19814	3	21	3	12	49	8	Both
s18v1-PF_19831	4	38	0	6	21	0	Both
s18v1-PF_19834	3	17	20	6	25	41	Both
s18v1-PF_19850	0	3	1	4	13	2	Both
s18v1-PF_19860	3	0	0	7	0	0	Both
s18v1-PF_20026	5	29	132	7	52	197	Both
s18v1-PF_20075	3	18	0	6	33	0	Both
s18v1-PF_20116	2	0	0	5	0	0	Both
s18v1-PF_20166	1	0	0	4	0	0	Both
s18v1-PF_20422	2	1	0	4	0	0	Both
s18v1-PF_20450	2	16	0	5	28	0	Both
s18v1-PF_20459	269	0	0	269	0	0	Both
s18v1-PF_20762	5	35	17	10	61	37	Both
s18v1-PF_20835	2	22	0	4	14	0	Both
s18v1-PF_2095	4	0	0	6	0	1	Both
s18v1-PF_21087	5	28	0	5	21	0	Both
s18v1-PF_21117	11	1	0	16	2	0	Both
s18v1-PF_21202	3	13	50	6	31	79	Both
s18v1-PF_21206	1	3	0	6	3	0	Both
s18v1-PF_21298	2	24	66	6	39	127	Both
s18v1-PF_21478	1	0	2	6	1	0	Both
s18v1-PF_21659	2	20	4	8	34	6	Both
s18v1-PF_21679	10	21	9	15	19	7	Both
s18v1-PF_21686	6	1	0	7	1	0	Both
s18v1-PF_21690	1	3	0	3	7	0	Both
s18v1-PF_21809	1	8	0	5	18	0	Both
s18v1-PF_21833	3	34	0	5	21	0	Both
s18v1-PF_21838	2	0	1	5	0	1	Both
s18v1-PF_21842	4	31	74	9	58	123	Both
s18v1-PF_21922	3	14	0	6	32	0	Both
s18v1-PF_21981	4	33	0	9	53	0	Both
s18v1-PF_21989	1	1	0	3	2	0	Both
s18v1-PF_22037	33	2	0	35	2	0	Both
s18v1-PF_22104	0	7	0	3	13	0	Both
s18v1-PF_22117	1	6	0	4	16	0	Both
s18v1-PF_22135	2	15	16	6	28	27	Both
s18v1-PF_22195	3	16	44	13	39	79	Both
s18v1-PF_22211	3	0	0	5	0	0	Both
s18v1-PF_22216	10	10	16	9	10	11	Both
s18v1-PF_22217	2	0	0	3	0	0	Both
s18v1-PF_2229	2	0	2	6	0	3	Both
s18v1-PF_22327	2	19	0	3	13	0	Both
s18v1-PF_22678	4	0	0	4	0	0	Both
s18v1-PF_22820	3	0	0	4	0	0	Both
s18v1-PF_2298	5	28	11	10	45	25	Both
s18v1-PF_22984	7	35	9	14	83	13	Both
s18v1-PF_2299	2	0	0	4	0	0	Both
s18v1-PF_22993	3	16	2	7	32	3	Both
s18v1-PF_23244	6	0	0	6	1	0	Both
s18v1-PF_23510	3	0	9	3	0	8	Both
s18v1-PF_23517	9	0	0	10	0	0	Both
s18v1-PF_2354	114	0	0	132	0	0	Both
s18v1-PF_23660	7	43	51	14	93	82	Both
s18v1-PF_23676	4	22	0	6	47	0	Both
s18v1-PF_23741	3	0	0	5	0	0	Both
s18v1-PF_23776	22	1	0	25	1	0	Both
s18v1-PF_23797	2	13	0	6	32	0	Both
s18v1-PF_23888	5	42	13	8	52	21	Both
s18v1-PF_23943	159	3	1	149	2	1	Both
s18v1-PF_23962	2	13	1	6	33	2	Both
s18v1-PF_23991	2	13	0	3	22	0	Both
s18v1-PF_24057	2	9	0	4	16	0	Both
s18v1-PF_24074	1	10	1	5	26	1	Both
s18v1-PF_24089	3	17	0	8	39	0	Both
s18v1-PF_24092	30	0	1	41	0	1	Both
s18v1-PF_24255	6	0	0	6	0	1	Both
s18v1-PF_24264	6	0	0	9	0	0	Both
s18v1-PF_2427	4	0	1	5	0	1	Both
s18v1-PF_24281	5	0	1	5	0	0	Both
s18v1-PF_24324	1	8	0	4	11	0	Both
s18v1-PF_24344	5	37	19	9	58	28	Both
s18v1-PF_24377	1	12	3	3	25	6	Both
s18v1-PF_24490	7	37	0	8	51	1	Both
s18v1-PF_24551	5	0	1	5	1	0	Both
s18v1-PF_24588	12	152	141	14	91	99	Both
s18v1-PF_24767	3	0	0	3	0	1	Both
s18v1-PF_24833	21	0	0	28	1	0	Both
s18v1-PF_24934	1	94	0	14	78	0	Both
s18v1-PF_25104	7	1	0	12	4	0	Both
s18v1-PF_25162	1	0	1	7	0	0	Both
s18v1-PF_2527	5	27	20	11	56	35	Both
s18v1-PF_25362	3	0	0	5	0	0	Both
s18v1-PF_25422	3	0	0	4	0	0	Both
s18v1-PF_25454	4	0	0	4	0	0	Both
s18v1-PF_25463	6	0	0	7	0	0	Both
s18v1-PF_25493	2	21	50	5	35	86	Both
s18v1-PF_25536	9	73	79	15	77	106	Both
s18v1-PF_25570	1	10	0	4	22	0	Both
s18v1-PF_25664	3	0	0	6	0	0	Both
s18v1-PF_25717	2	12	0	5	32	0	Both
s18v1-PF_2591	3	0	1	3	0	1	Both
s18v1-PF_25912	4	23	0	9	53	0	Both
s18v1-PF_26084	9	0	1	17	0	1	Both
s18v1-PF_261	6	34	41	14	72	56	Both
s18v1-PF_26174	2	12	0	4	24	0	Both
s18v1-PF_26194	3	0	1	5	0	1	Both
s18v1-PF_26205	4	0	2	6	1	2	Both
s18v1-PF_26258	117	0	0	120	0	0	Both
s18v1-PF_26410	5	0	0	5	0	0	Both
s18v1-PF_26423	533	0	3	602	0	2	Both
s18v1-PF_2666	1	16	0	5	27	0	Both
s18v1-PF_26670	3	0	0	3	0	0	Both
s18v1-PF_26681	6	1	0	8	1	1	Both
s18v1-PF_26834	3	18	188	7	38	298	Both
s18v1-PF_26964	5	1	0	11	2	0	Both
s18v1-PF_27003	9	55	1	12	46	1	Both
s18v1-PF_27052	5	0	0	5	1	0	Both
s18v1-PF_2709	4	0	1	7	1	1	Both
s18v1-PF_27367	5	0	0	3	0	0	Both
s18v1-PF_27440	5	0	0	7	0	0	Both
s18v1-PF_27608	4	1	0	5	1	1	Both
s18v1-PF_27614	3	0	0	4	0	0	Both
s18v1-PF_27615	18	0	1	18	0	1	Both
s18v1-PF_27619	3	20	123	9	40	204	Both
s18v1-PF_2765	4	26	9	12	48	19	Both
s18v1-PF_27651	2	0	0	3	0	0	Both
s18v1-PF_27655	15	4	5	28	11	10	Both
s18v1-PF_27662	4	6	3	8	11	4	Both
s18v1-PF_2772	2	18	0	7	34	0	Both
s18v1-PF_27836	9	77	138	25	139	213	Both
s18v1-PF_27867	4	0	0	7	1	0	Both
s18v1-PF_27873	5	59	0	7	34	0	Both
s18v1-PF_27966	3	15	0	7	45	0	Both
s18v1-PF_28060	1	13	80	6	31	160	Both
s18v1-PF_28185	3	0	1	23	0	0	Both
s18v1-PF_28310	8	3	0	8	2	1	Both
s18v1-PF_28438	19	0	0	19	0	2	Both
s18v1-PF_28475	1	4	36	4	9	54	Both
s18v1-PF_28508	5	1	0	6	0	0	Both
s18v1-PF_28516	4	2	1	4	1	0	Both
s18v1-PF_28574	21	117	1	28	84	1	Both
s18v1-PF_28637	8	0	0	9	0	0	Both
s18v1-PF_2864	9	4	0	12	5	1	Both
s18v1-PF_28760	4	23	0	9	55	0	Both
s18v1-PF_28774	2	0	1	2	0	3	Both
s18v1-PF_28858	6	40	25	13	74	53	Both
s18v1-PF_28991	4	0	0	7	0	0	Both
s18v1-PF_29093	5	3	0	7	2	0	Both
s18v1-PF_29286	1	3	1	2	4	0	Both
s18v1-PF_29301	3	27	0	6	38	0	Both
s18v1-PF_2937	8	0	5	22	7	1	Both
s18v1-PF_29376	6	50	6	5	29	4	Both
s18v1-PF_2942	2	7	0	5	15	0	Both
s18v1-PF_29494	1	5	30	3	12	42	Both
s18v1-PF_29506	1785	0	2	1802	0	2	Both
s18v1-PF_2955	6	41	18	10	59	23	Both
s18v1-PF_29575	4	0	0	4	0	0	Both
s18v1-PF_29601	2	9	0	6	27	0	Both
s18v1-PF_29604	3	0	0	3	1	2	Both
s18v1-PF_29606	2	0	1	2	0	1	Both
s18v1-PF_29658	1	2	0	2	10	0	Both
s18v1-PF_29715	12	72	1	22	138	2	Both
s18v1-PF_29716	1	9	0	4	13	0	Both
s18v1-PF_29745	7	0	0	7	0	0	Both
s18v1-PF_29840	1	13	0	9	37	0	Both
s18v1-PF_2991	2	11	0	5	39	0	Both
s18v1-PF_30024	1	9	0	5	18	0	Both
s18v1-PF_30056	33	96	0	47	73	1	Both
s18v1-PF_301	6	1	0	10	2	0	Both
s18v1-PF_30119	3	22	0	5	38	0	Both
s18v1-PF_30179	4	0	0	5	1	0	Both
s18v1-PF_30198	3	0	0	6	2	2	Both
s18v1-PF_30241	4	20	371	6	37	326	Both
s18v1-PF_30309	5	54	0	6	30	0	Both
s18v1-PF_30319	3	0	0	6	0	1	Both
s18v1-PF_3034	4	13	0	6	29	0	Both
s18v1-PF_30530	2	0	0	4	1	0	Both
s18v1-PF_30607	1	16	0	5	31	0	Both
s18v1-PF_30769	2	10	0	5	22	0	Both
s18v1-PF_30794	5	29	0	4	36	0	Both
s18v1-PF_30948	10	1	6	15	1	7	Both
s18v1-PF_30991	4	30	72	6	44	126	Both
s18v1-PF_31096	37	187	10	48	131	7	Both
s18v1-PF_31131	2	0	0	6	0	0	Both
s18v1-PF_31307	3	0	0	5	0	0	Both
s18v1-PF_31350	20	0	0	22	0	0	Both
s18v1-PF_31478	2	22	52	9	51	75	Both
s18v1-PF_31532	6	31	5	9	52	12	Both
s18v1-PF_31558	6	32	107	12	65	195	Both
s18v1-PF_31561	8	0	0	8	0	0	Both
s18v1-PF_31567	4	23	193	10	55	298	Both
s18v1-PF_31600	2	21	0	6	34	0	Both
s18v1-PF_31925	7	0	0	7	0	0	Both
s18v1-PF_3193	4	0	1	4	1	2	Both
s18v1-PF_31971	1	9	36	4	18	48	Both
s18v1-PF_31993	1	9	0	4	17	0	Both
s18v1-PF_32121	3	0	0	7	0	0	Both
s18v1-PF_32171	3	0	0	5	0	1	Both
s18v1-PF_3218	29	0	0	33	0	0	Both
s18v1-PF_3224	7	33	77	8	76	153	Both
s18v1-PF_32245	4	20	284	7	39	315	Both
s18v1-PF_3225	8	23	17	12	18	12	Both
s18v1-PF_32280	0	5	0	5	17	0	Both
s18v1-PF_32378	2	14	0	5	31	0	Both
s18v1-PF_32543	6	34	140	12	65	200	Both
s18v1-PF_32555	3	1	6	5	1	5	Both
s18v1-PF_32671	3	9	11	5	7	6	Both
s18v1-PF_32871	3	0	0	6	0	0	Both
s18v1-PF_32914	2	9	93	4	28	157	Both
s18v1-PF_32972	3	0	0	3	0	0	Both
s18v1-PF_32996	2	19	0	5	42	0	Both
s18v1-PF_33029	3	24	18	6	27	37	Both
s18v1-PF_33063	7	50	26	15	93	49	Both
s18v1-PF_33089	1	3	3	1	9	4	Both
s18v1-PF_33108	7	0	1	11	0	1	Both
s18v1-PF_33151	43	225	2	49	152	0	Both
s18v1-PF_33153	4	0	0	5	0	0	Both
s18v1-PF_33217	0	0	0	8	0	0	Both
s18v1-PF_33323	2	0	0	5	1	5	Both
s18v1-PF_33464	25	244	0	32	142	0	Both
s18v1-PF_33509	4	27	21	10	55	38	Both
s18v1-PF_33698	1	3	3	3	17	6	Both
s18v1-PF_33719	21	0	1	27	0	1	Both
s18v1-PF_3385	2	0	1	5	0	1	Both
s18v1-PF_33865	2	0	0	4	0	0	Both
s18v1-PF_33866	29	196	238	50	344	419	Both
s18v1-PF_33868	12	91	1	17	101	1	Both
s18v1-PF_33880	5	0	0	5	0	0	Both
s18v1-PF_34033	6	0	0	12	0	1	Both
s18v1-PF_34061	3	0	0	5	0	0	Both
s18v1-PF_34115	4	20	32	6	42	51	Both
s18v1-PF_34165	2	0	0	5	0	0	Both
s18v1-PF_34193	2	0	2	5	0	1	Both
s18v1-PF_34241	2	11	1	6	27	2	Both
s18v1-PF_34276	3	14	84	4	20	138	Both
s18v1-PF_34306	0	1	4	2	3	16	Both
s18v1-PF_34344	1	7	13	4	19	23	Both
s18v1-PF_34438	6	1	0	9	1	0	Both
s18v1-PF_34633	1222	0	90	1328	0	66	Both
s18v1-PF_34669	334	0	8	367	0	7	Both
s18v1-PF_34738	807	0	0	860	0	0	Both
s18v1-PF_34781	5	0	1	8	0	1	Both
s18v1-PF_34840	1	0	0	5	0	0	Both
s18v1-PF_34855	3	0	0	6	1	0	Both
s18v1-PF_35047	7	36	53	16	93	97	Both
s18v1-PF_35050	9	0	0	11	0	0	Both
s18v1-PF_35056	1	1	0	2	3	1	Both
s18v1-PF_35125	3	25	30	10	48	48	Both
s18v1-PF_35127	1	14	0	5	22	0	Both
s18v1-PF_35245	3	0	0	6	0	1	Both
s18v1-PF_35357	2	0	0	4	0	0	Both
s18v1-PF_35536	3	0	0	3	0	0	Both
s18v1-PF_35538	2	7	0	5	24	0	Both
s18v1-PF_35546	3	0	1	6	1	1	Both
s18v1-PF_35595	5	17	116	8	41	200	Both
s18v1-PF_35748	0	2	0	2	2	0	Both
s18v1-PF_35780	1	10	88	5	15	168	Both
s18v1-PF_35823	1	0	0	3	0	0	Both
s18v1-PF_35910	8	1	0	8	1	0	Both
s18v1-PF_35912	4	22	0	4	15	0	Both
s18v1-PF_35967	5	31	0	5	32	0	Both
s18v1-PF_36053	2	15	8	6	32	13	Both
s18v1-PF_36107	3	32	0	4	19	0	Both
s18v1-PF_36123	2	0	0	7	1	0	Both
s18v1-PF_36200	8	0	0	8	0	0	Both
s18v1-PF_36215	3	0	0	4	0	0	Both
s18v1-PF_36217	2686	0	0	2605	0	0	Both
s18v1-PF_36255	6	2	1	12	3	1	Both
s18v1-PF_364	257	3170	22	362	1832	18	Both
s18v1-PF_36448	3	18	41	8	40	70	Both
s18v1-PF_36488	4	0	0	5	0	0	Both
s18v1-PF_36495	6	36	138	13	67	210	Both
s18v1-PF_36501	59	20	15	71	15	11	Both
s18v1-PF_36503	6	8	1	11	8	1	Both
s18v1-PF_36527	1	11	0	4	21	0	Both
s18v1-PF_36547	1	0	0	4	0	0	Both
s18v1-PF_36565	1	7	28	4	15	37	Both
s18v1-PF_3668	2	0	0	6	1	1	Both
s18v1-PF_367	2	14	0	6	31	0	Both
s18v1-PF_36863	4	0	1	7	1	1	Both
s18v1-PF_36981	2	0	1	7	0	0	Both
s18v1-PF_37068	3	0	0	5	0	0	Both
s18v1-PF_37093	3	0	0	5	0	0	Both
s18v1-PF_3728	9	13	1	17	18	0	Both
s18v1-PF_37310	2	9	1	5	31	2	Both
s18v1-PF_37375	7	45	110	17	71	189	Both
s18v1-PF_37421	2	16	0	7	33	0	Both
s18v1-PF_37445	6	2	0	11	5	0	Both
s18v1-PF_37454	5	36	0	10	55	0	Both
s18v1-PF_3746	2	26	0	5	34	0	Both
s18v1-PF_37662	8	53	110	20	103	175	Both
s18v1-PF_37665	10	49	9	12	53	21	Both
s18v1-PF_37768	1	10	0	7	30	0	Both
s18v1-PF_37840	1	12	5	4	24	8	Both
s18v1-PF_37911	4	30	7	7	41	11	Both
s18v1-PF_37916	3	23	1	7	40	3	Both
s18v1-PF_38265	5	47	56	14	72	72	Both
s18v1-PF_38356	21	2	0	37	3	0	Both
s18v1-PF_38460	7	43	0	13	74	1	Both
s18v1-PF_38477	4	0	0	5	0	0	Both
s18v1-PF_38518	20	0	0	21	0	0	Both
s18v1-PF_38534	5	0	6	6	0	3	Both
s18v1-PF_38617	5	0	0	7	1	1	Both
s18v1-PF_38686	0	6	1	4	15	5	Both
s18v1-PF_38699	8	1	0	15	2	0	Both
s18v1-PF_38726	38	0	0	44	0	0	Both
s18v1-PF_38741	2	2	1	4	3	2	Both
s18v1-PF_38775	4	0	0	5	0	0	Both
s18v1-PF_3878	142	14	0	160	9	0	Both
s18v1-PF_38984	5	31	5	6	30	11	Both
s18v1-PF_39165	5	30	31	12	63	51	Both
s18v1-PF_39222	3	21	0	6	25	0	Both
s18v1-PF_39226	3	22	0	6	33	0	Both
s18v1-PF_39317	5	0	0	8	1	2	Both
s18v1-PF_39371	2	19	0	4	15	1	Both
s18v1-PF_39397	2	0	0	4	0	0	Both
s18v1-PF_39418	19	0	0	26	0	0	Both
s18v1-PF_39481	4	0	0	4	0	1	Both
s18v1-PF_39488	2	0	0	6	0	0	Both
s18v1-PF_39498	2	0	0	4	1	0	Both
s18v1-PF_39560	3	1	0	7	1	0	Both
s18v1-PF_39623	4	0	1	7	0	1	Both
s18v1-PF_3964	10	2	0	16	5	0	Both
s18v1-PF_39641	2	13	0	4	22	0	Both
s18v1-PF_39686	2	0	2	3	0	0	Both
s18v1-PF_39720	13	77	17	24	136	29	Both
s18v1-PF_39778	5	52	66	17	99	112	Both
s18v1-PF_39815	1	10	0	5	22	0	Both
s18v1-PF_39843	12	3	1	18	4	1	Both
s18v1-PF_3985	4	22	13	8	45	31	Both
s18v1-PF_39882	3	0	0	5	0	0	Both
s18v1-PF_39930	2	1	0	5	2	0	Both
s18v1-PF_39954	2	0	1	3	0	1	Both
s18v1-PF_3996	3	28	21	11	53	38	Both
s18v1-PF_39978	5	0	0	7	0	0	Both
s18v1-PF_39987	3	0	1	5	0	2	Both
s18v1-PF_4005	1	0	0	3	0	0	Both
s18v1-PF_4011	3	11	10	4	28	24	Both
s18v1-PF_40140	3	11	0	5	26	0	Both
s18v1-PF_40501	2	15	7	8	31	16	Both
s18v1-PF_40598	798	7908	2	929	4914	2	Both
s18v1-PF_4075	10	1	0	10	1	0	Both
s18v1-PF_40781	4	0	0	5	0	0	Both
s18v1-PF_40793	3	1	0	5	0	0	Both
s18v1-PF_40811	4	0	0	6	1	1	Both
s18v1-PF_40889	2	15	0	6	30	0	Both
s18v1-PF_41016	2	16	2	6	27	3	Both
s18v1-PF_41041	1	1	0	2	10	0	Both
s18v1-PF_41450	4	0	0	6	0	0	Both
s18v1-PF_41472	6	0	0	8	1	0	Both
s18v1-PF_41500	6	1	0	8	1	0	Both
s18v1-PF_41599	6	0	1	7	1	2	Both
s18v1-PF_41605	3	0	0	4	0	0	Both
s18v1-PF_41660	3	22	132	9	51	210	Both
s18v1-PF_41754	7	0	0	8	0	0	Both
s18v1-PF_41815	7	2	4	8	3	3	Both
s18v1-PF_41866	4	0	0	8	0	0	Both
s18v1-PF_41974	1	0	1	6	1	0	Both
s18v1-PF_42187	3	23	12	7	41	18	Both
s18v1-PF_422	2	0	0	5	1	1	Both
s18v1-PF_42401	2	16	0	6	29	0	Both
s18v1-PF_42437	5	25	12	10	49	23	Both
s18v1-PF_42566	2	10	0	7	18	2	Both
s18v1-PF_42585	5	0	0	9	1	1	Both
s18v1-PF_42685	4	26	99	7	53	168	Both
s18v1-PF_42686	102	677	0	145	496	0	Both
s18v1-PF_42795	8	1	0	10	3	1	Both
s18v1-PF_429	5	0	0	7	0	1	Both
s18v1-PF_43443	1	0	0	5	0	0	Both
s18v1-PF_43745	2	0	1	4	0	1	Both
s18v1-PF_43869	7	0	0	13	0	0	Both
s18v1-PF_43913	81	0	0	93	0	0	Both
s18v1-PF_43969	6	36	9	13	63	18	Both
s18v1-PF_44095	7	0	0	7	0	0	Both
s18v1-PF_44117	3	25	147	7	60	269	Both
s18v1-PF_44137	5	0	1	7	0	1	Both
s18v1-PF_44158	8	53	166	18	92	274	Both
s18v1-PF_44198	3	16	6	8	39	12	Both
s18v1-PF_44201	2	12	0	6	32	0	Both
s18v1-PF_44213	6	0	0	7	0	0	Both
s18v1-PF_44254	3	17	31	6	38	46	Both
s18v1-PF_44385	4	23	82	10	53	128	Both
s18v1-PF_44443	3	21	1	6	38	1	Both
s18v1-PF_44578	93	43	0	106	28	0	Both
s18v1-PF_44580	3	15	0	5	29	0	Both
s18v1-PF_44598	3	20	13	6	29	21	Both
s18v1-PF_4465	1	2	10	1	7	25	Both
s18v1-PF_44686	1	1	0	4	2	0	Both
s18v1-PF_44755	4	5	0	5	3	0	Both
s18v1-PF_44806	8	0	0	9	0	0	Both
s18v1-PF_44885	7	0	0	7	0	0	Both
s18v1-PF_44943	3	3	0	10	3	0	Both
s18v1-PF_45022	4	0	1	7	1	1	Both
s18v1-PF_45204	3	19	17	5	31	26	Both
s18v1-PF_45318	6	0	0	6	0	1	Both
s18v1-PF_45323	7	40	51	10	57	87	Both
s18v1-PF_45377	3	0	0	2	0	0	Both
s18v1-PF_45547	5	19	20	9	47	51	Both
s18v1-PF_45718	2	0	1	3	0	1	Both
s18v1-PF_45733	3	0	0	7	0	0	Both
s18v1-PF_45844	3	1	0	10	1	0	Both
s18v1-PF_45852	4	0	0	5	0	0	Both
s18v1-PF_45872	4	25	219	8	49	337	Both
s18v1-PF_45882	2	12	1	4	22	2	Both
s18v1-PF_45925	1	14	2	3	23	4	Both
s18v1-PF_45966	7	0	0	7	0	1	Both
s18v1-PF_4598	2	0	1	5	0	0	Both
s18v1-PF_46112	5	2	0	6	1	0	Both
s18v1-PF_46120	4	32	41	6	35	65	Both
s18v1-PF_46134	4	0	5	3	0	4	Both
s18v1-PF_46315	14	3	0	14	2	0	Both
s18v1-PF_46319	2	12	12	8	34	27	Both
s18v1-PF_46328	30	0	0	33	0	0	Both
s18v1-PF_4637	5	0	0	4	0	0	Both
s18v1-PF_46437	3	2	4	4	2	3	Both
s18v1-PF_46454	3	0	1	6	0	0	Both
s18v1-PF_46538	4	26	0	5	19	0	Both
s18v1-PF_46695	6	0	0	6	0	0	Both
s18v1-PF_46716	2	8	0	6	16	0	Both
s18v1-PF_46804	3	0	0	4	0	0	Both
s18v1-PF_46826	6	0	0	8	0	0	Both
s18v1-PF_46834	2	11	0	4	21	0	Both
s18v1-PF_46842	6	0	0	7	0	0	Both
s18v1-PF_46859	4	29	0	3	17	0	Both
s18v1-PF_4688	3	0	0	6	0	0	Both
s18v1-PF_4689	5	57	0	7	37	0	Both
s18v1-PF_4696	3	0	0	6	0	0	Both
s18v1-PF_47062	4	0	0	7	0	0	Both
s18v1-PF_47105	1	8	0	5	19	1	Both
s18v1-PF_47169	3	1	1	7	1	2	Both
s18v1-PF_47329	2749	0	0	2828	0	0	Both
s18v1-PF_47351	8	0	0	10	0	0	Both
s18v1-PF_47375	8	47	0	9	27	0	Both
s18v1-PF_4753	3	16	0	6	31	0	Both
s18v1-PF_47576	3	0	1	8	1	2	Both
s18v1-PF_4764	2	0	0	2	0	0	Both
s18v1-PF_4784	133	0	0	144	0	0	Both
s18v1-PF_48143	4	1	0	5	2	0	Both
s18v1-PF_48177	7	35	83	11	68	127	Both
s18v1-PF_48233	2	11	9	4	17	14	Both
s18v1-PF_48304	1	4	0	3	9	0	Both
s18v1-PF_48377	5	44	1	10	58	1	Both
s18v1-PF_48427	2	0	0	4	0	0	Both
s18v1-PF_48512	14	6	1	20	12	1	Both
s18v1-PF_48786	5	28	0	7	42	0	Both
s18v1-PF_48894	7	26	0	6	53	0	Both
s18v1-PF_48976	1	9	0	3	20	0	Both
s18v1-PF_48991	2	11	0	5	19	1	Both
s18v1-PF_48999	10	4	1	13	6	3	Both
s18v1-PF_49034	4	0	0	7	0	0	Both
s18v1-PF_49049	2	16	0	5	25	1	Both
s18v1-PF_49079	5	0	0	6	0	0	Both
s18v1-PF_49083	3	19	0	6	37	0	Both
s18v1-PF_49099	4	0	1	5	0	1	Both
s18v1-PF_49156	1172	0	1	1166	0	1	Both
s18v1-PF_49193	5	2	4	6	2	3	Both
s18v1-PF_49298	7	48	67	14	68	120	Both
s18v1-PF_49364	4	0	0	6	1	0	Both
s18v1-PF_49536	3	0	0	5	1	1	Both
s18v1-PF_49657	2	12	0	4	28	0	Both
s18v1-PF_49672	2	0	0	4	0	0	Both
s18v1-PF_49684	3	0	1	6	1	3	Both
s18v1-PF_49716	4	0	0	9	3	0	Both
s18v1-PF_49741	126	31	1	127	18	0	Both
s18v1-PF_49800	12	22	19	12	17	15	Both
s18v1-PF_49819	4	0	2	8	0	3	Both
s18v1-PF_49831	23	0	0	23	0	0	Both
s18v1-PF_49897	2	13	15	6	28	26	Both
s18v1-PF_49923	3	15	3	8	37	6	Both
s18v1-PF_50019	6	1	0	9	1	0	Both
s18v1-PF_50038	3	13	0	4	23	0	Both
s18v1-PF_50074	3	13	0	5	35	0	Both
s18v1-PF_50115	1	0	0	3	0	0	Both
s18v1-PF_50221	6	32	12	11	59	23	Both
s18v1-PF_50260	4	28	12	8	50	21	Both
s18v1-PF_50305	3	11	3	3	20	4	Both
s18v1-PF_50323	5	0	0	8	2	0	Both
s18v1-PF_50325	5	0	0	7	0	0	Both
s18v1-PF_50375	8	1	0	7	1	0	Both
s18v1-PF_50387	2	8	2	4	22	3	Both
s18v1-PF_50461	13	0	0	14	0	0	Both
s18v1-PF_50470	5	36	8	9	50	19	Both
s18v1-PF_50519	2	13	0	4	26	0	Both
s18v1-PF_50545	3	0	0	5	0	0	Both
s18v1-PF_5055	1	9	0	2	15	0	Both
s18v1-PF_50598	5	0	0	5	0	0	Both
s18v1-PF_50623	8	0	1	10	0	1	Both
s18v1-PF_50653	4	0	0	10	1	2	Both
s18v1-PF_50690	4	29	40	6	37	81	Both
s18v1-PF_50800	4	2	0	6	0	0	Both
s18v1-PF_5082	7	0	2	11	1	3	Both
s18v1-PF_50875	3	0	0	3	0	0	Both
s18v1-PF_5091	1	0	0	4	0	0	Both
s18v1-PF_50942	5	0	0	10	0	0	Both
s18v1-PF_50963	7	40	67	13	73	134	Both
s18v1-PF_50966	6	29	0	6	44	0	Both
s18v1-PF_51120	3	13	0	5	32	0	Both
s18v1-PF_51180	1	8	0	7	20	2	Both
s18v1-PF_51181	7	48	10	11	59	13	Both
s18v1-PF_5122	27	0	10	35	0	7	Both
s18v1-PF_51295	3	24	139	7	46	265	Both
s18v1-PF_51307	3	10	0	3	16	0	Both
s18v1-PF_51325	5	0	2	8	1	2	Both
s18v1-PF_51390	0	0	1	23	0	0	Both
s18v1-PF_51461	3	1	0	5	1	0	Both
s18v1-PF_5154	2	7	0	5	17	0	Both
s18v1-PF_51565	2	8	0	6	24	0	Both
s18v1-PF_51608	5	1	1	8	1	2	Both
s18v1-PF_51698	1	10	1	5	21	4	Both
s18v1-PF_51704	7	1	0	13	2	0	Both
s18v1-PF_51738	1	1	0	2	0	0	Both
s18v1-PF_51747	4	19	90	8	48	140	Both
s18v1-PF_51875	3	0	1	5	0	2	Both
s18v1-PF_51914	3	0	0	5	0	0	Both
s18v1-PF_51963	6	39	23	13	80	31	Both
s18v1-PF_52028	7	54	2	14	74	3	Both
s18v1-PF_52068	3	10	83	6	24	143	Both
s18v1-PF_52463	6	0	1	7	0	1	Both
s18v1-PF_52601	2	15	0	6	26	0	Both
s18v1-PF_52667	2	16	1	4	24	1	Both
s18v1-PF_52710	2	1	0	4	1	0	Both
s18v1-PF_52741	2	27	0	5	32	0	Both
s18v1-PF_53129	1	1	0	2	6	0	Both
s18v1-PF_53149	2	16	0	5	30	0	Both
s18v1-PF_53263	8	38	108	14	71	205	Both
s18v1-PF_53308	3	14	23	3	36	30	Both
s18v1-PF_5333	8	1	0	15	2	0	Both
s18v1-PF_53355	2	1	0	6	1	1	Both
s18v1-PF_53390	2	0	0	5	0	0	Both
s18v1-PF_53393	8	54	69	15	93	103	Both
s18v1-PF_53569	5	0	0	7	0	0	Both
s18v1-PF_53641	3	1	0	8	2	0	Both
s18v1-PF_53675	3	12	2	5	33	4	Both
s18v1-PF_53824	2	2	0	7	4	0	Both
s18v1-PF_53860	6	32	8	11	69	13	Both
s18v1-PF_5394	4	0	0	3	0	0	Both
s18v1-PF_53955	3	0	0	5	0	0	Both
s18v1-PF_53993	9	64	86	25	132	137	Both
s18v1-PF_54007	0	0	2	11	1	2	Both
s18v1-PF_54073	0	13	0	4	21	0	Both
s18v1-PF_54103	30	65	1	39	66	2	Both
s18v1-PF_54108	3	17	137	5	34	250	Both
s18v1-PF_54177	2	0	0	4	1	2	Both
s18v1-PF_54190	12	78	0	19	135	0	Both
s18v1-PF_54215	3	13	1	8	21	2	Both
s18v1-PF_54226	11	1	0	16	1	1	Both
s18v1-PF_5425	1	6	0	4	15	0	Both
s18v1-PF_54288	5	0	0	10	1	0	Both
s18v1-PF_54297	8	56	90	20	118	148	Both
s18v1-PF_54310	3	0	4	4	0	2	Both
s18v1-PF_54336	2	7	0	3	18	0	Both
s18v1-PF_54342	7	0	0	6	0	0	Both
s18v1-PF_5438	4	1	0	9	1	0	Both
s18v1-PF_54437	4	0	0	6	0	0	Both
s18v1-PF_54474	5	0	0	6	0	0	Both
s18v1-PF_54570	3	22	0	9	39	1	Both
s18v1-PF_54575	4	39	118	10	58	186	Both
s18v1-PF_54646	3	19	166	8	40	211	Both
s18v1-PF_54782	2	0	0	4	0	0	Both
s18v1-PF_54859	4	29	4	9	54	7	Both
s18v1-PF_54870	3	0	1	4	0	1	Both
s18v1-PF_54929	4	20	0	6	39	0	Both
s18v1-PF_54996	3	32	0	5	20	0	Both
s18v1-PF_55207	18	131	90	25	147	146	Both
s18v1-PF_55308	1	18	128	7	33	224	Both
s18v1-PF_55348	4	31	180	13	66	271	Both
s18v1-PF_55546	3	22	114	7	41	195	Both
s18v1-PF_55592	5	25	1	8	46	2	Both
s18v1-PF_55637	3	11	0	6	25	0	Both
s18v1-PF_56034	53	391	1	68	354	2	Both
s18v1-PF_56068	1	4	2	3	11	4	Both
s18v1-PF_56082	2	16	107	7	32	189	Both
s18v1-PF_56267	2	0	0	4	0	0	Both
s18v1-PF_56435	2	0	0	6	0	0	Both
s18v1-PF_56440	4	23	0	6	45	1	Both
s18v1-PF_56444	2	22	0	5	30	0	Both
s18v1-PF_56491	3	21	0	7	31	1	Both
s18v1-PF_56499	1	0	1	3	0	2	Both
s18v1-PF_56625	5	29	29	14	63	57	Both
s18v1-PF_56774	1	9	0	3	15	0	Both
s18v1-PF_56830	4	13	12	8	10	9	Both
s18v1-PF_56855	3	21	155	5	35	239	Both
s18v1-PF_56922	3	19	0	7	28	0	Both
s18v1-PF_56987	6	0	0	8	0	1	Both
s18v1-PF_57061	9	17	4	18	40	2	Both
s18v1-PF_5712	8	50	7	15	80	16	Both
s18v1-PF_57252	6	3	1	7	2	1	Both
s18v1-PF_57314	8	0	0	8	0	0	Both
s18v1-PF_57501	2	6	0	3	11	0	Both
s18v1-PF_57545	10	0	0	12	0	0	Both
s18v1-PF_5755	4	17	0	7	34	0	Both
s18v1-PF_57586	3	0	0	6	0	1	Both
s18v1-PF_57684	3	16	19	8	33	39	Both
s18v1-PF_5769	1	0	0	4	0	0	Both
s18v1-PF_57719	6	39	84	14	76	140	Both
s18v1-PF_5779	3	18	0	8	39	0	Both
s18v1-PF_57803	3	0	0	4	0	0	Both
s18v1-PF_57868	5	30	87	13	57	147	Both
s18v1-PF_57980	6	0	0	7	0	0	Both
s18v1-PF_58115	1	11	12	5	32	26	Both
s18v1-PF_5815	6	5	10	9	5	7	Both
s18v1-PF_58184	2	11	0	4	29	0	Both
s18v1-PF_58194	6	44	0	16	81	0	Both
s18v1-PF_58459	4	0	2	8	1	3	Both
s18v1-PF_58483	2	0	0	4	0	0	Both
s18v1-PF_58490	4	0	1	7	1	2	Both
s18v1-PF_58505	3	15	2	5	32	4	Both
s18v1-PF_58551	5	0	0	6	0	0	Both
s18v1-PF_58582	2	14	100	4	24	135	Both
s18v1-PF_58751	3	0	0	4	0	0	Both
s18v1-PF_58888	7	35	35	14	75	53	Both
s18v1-PF_58969	3	0	0	5	0	0	Both
s18v1-PF_58978	3	29	12	8	37	23	Both
s18v1-PF_59071	4	27	27	8	47	36	Both
s18v1-PF_591	4	5	0	3	9	1	Both
s18v1-PF_59183	2	12	0	4	25	0	Both
s18v1-PF_59242	2	10	106	5	25	157	Both
s18v1-PF_59251	4	0	1	5	0	4	Both
s18v1-PF_59297	3	0	0	10	0	0	Both
s18v1-PF_59413	0	0	1	3	0	0	Both
s18v1-PF_59483	18	0	0	20	0	0	Both
s18v1-PF_59499	4	0	0	5	0	0	Both
s18v1-PF_59503	11	108	0	17	70	0	Both
s18v1-PF_59524	4	26	10	8	46	18	Both
s18v1-PF_59580	2	12	1	6	27	3	Both
s18v1-PF_59624	3	9	6	5	20	13	Both
s18v1-PF_59800	2	15	0	4	10	0	Both
s18v1-PF_60094	2	9	43	5	22	53	Both
s18v1-PF_60351	6	0	1	6	0	0	Both
s18v1-PF_60353	14	70	146	22	136	253	Both
s18v1-PF_60390	3	11	134	4	27	213	Both
s18v1-PF_6052	6	3	0	8	5	0	Both
s18v1-PF_60574	2	21	8	6	38	15	Both
s18v1-PF_6058	16	0	0	15	0	0	Both
s18v1-PF_60603	4	21	2	6	34	4	Both
s18v1-PF_60622	2	0	0	5	0	1	Both
s18v1-PF_60821	5	2	0	10	5	0	Both
s18v1-PF_60842	3	0	0	4	0	0	Both
s18v1-PF_60893	13	2	0	19	3	0	Both
s18v1-PF_60918	5	0	0	7	0	0	Both
s18v1-PF_60922	1	1	1	6	0	3	Both
s18v1-PF_61237	3	0	0	4	0	0	Both
s18v1-PF_61261	2	18	0	6	34	0	Both
s18v1-PF_61364	2	16	0	6	32	0	Both
s18v1-PF_61437	1	13	0	5	31	1	Both
s18v1-PF_61504	6	0	0	7	0	0	Both
s18v1-PF_61635	5	19	0	10	47	0	Both
s18v1-PF_61707	4	0	0	5	0	0	Both
s18v1-PF_61762	2	0	0	5	0	0	Both
s18v1-PF_62052	7	34	153	16	76	274	Both
s18v1-PF_62080	3	28	0	4	15	0	Both
s18v1-PF_62136	21	191	0	24	114	0	Both
s18v1-PF_62199	3	0	0	4	0	0	Both
s18v1-PF_62317	3	26	0	5	28	1	Both
s18v1-PF_62439	3	28	172	8	53	287	Both
s18v1-PF_62478	0	2	0	3	4	0	Both
s18v1-PF_62584	3	0	1	5	0	2	Both
s18v1-PF_6279	1	12	0	3	8	0	Both
s18v1-PF_62905	3	32	1	6	36	3	Both
s18v1-PF_62915	3	18	3	8	37	5	Both
s18v1-PF_62952	6	41	0	14	76	0	Both
s18v1-PF_62994	3	0	0	4	1	0	Both
s18v1-PF_63002	2	11	146	4	25	202	Both
s18v1-PF_63150	5	37	43	12	73	77	Both
s18v1-PF_63151	7	31	0	9	55	0	Both
s18v1-PF_63166	2	0	0	4	1	0	Both
s18v1-PF_63256	5	0	0	6	0	0	Both
s18v1-PF_63281	6	0	0	7	1	1	Both
s18v1-PF_63286	5	0	3	6	0	3	Both
s18v1-PF_63291	4	0	1	6	0	2	Both
s18v1-PF_63365	98	0	0	106	0	0	Both
s18v1-PF_63381	8	44	0	14	87	1	Both
s18v1-PF_63414	4	30	0	5	36	0	Both
s18v1-PF_6343	3	24	0	8	41	0	Both
s18v1-PF_63451	1	9	2	4	20	5	Both
s18v1-PF_63512	3	25	0	7	30	0	Both
s18v1-PF_63570	2	2	0	4	2	0	Both
s18v1-PF_63593	5	19	0	6	29	0	Both
s18v1-PF_63663	3	0	0	4	0	0	Both
s18v1-PF_63798	3	0	0	7	0	1	Both
s18v1-PF_63994	215	2252	0	243	1324	0	Both
s18v1-PF_64058	2	0	0	6	0	0	Both
s18v1-PF_6406	3	28	27	9	48	40	Both
s18v1-PF_64092	3	23	0	4	30	0	Both
s18v1-PF_64143	1	7	0	4	8	0	Both
s18v1-PF_64191	4	1	1	9	1	2	Both
s18v1-PF_64227	42	0	0	50	0	0	Both
s18v1-PF_64294	2	23	22	6	37	35	Both
s18v1-PF_64315	2	0	0	5	1	1	Both
s18v1-PF_64385	2	14	0	4	22	0	Both
s18v1-PF_64490	8	1	0	14	3	1	Both
s18v1-PF_64563	10	21	1	12	20	2	Both
s18v1-PF_6458	6	0	1	7	0	1	Both
s18v1-PF_64645	0	5	17	2	8	27	Both
s18v1-PF_64665	1	4	0	3	9	0	Both
s18v1-PF_64688	5	2	22	6	6	14	Both
s18v1-PF_64730	15	57	107	22	126	178	Both
s18v1-PF_64837	3	13	109	7	33	166	Both
s18v1-PF_64908	3	0	0	5	0	0	Both
s18v1-PF_65129	2	8	0	4	25	0	Both
s18v1-PF_65159	8	54	146	13	66	258	Both
s18v1-PF_65314	1	15	0	2	9	0	Both
s18v1-PF_65376	3	1	1	8	2	1	Both
s18v1-PF_65531	6	37	29	11	67	36	Both
s18v1-PF_65549	2	17	5	7	39	10	Both
s18v1-PF_65552	8	16	3	10	12	2	Both
s18v1-PF_65582	10	0	1	12	1	1	Both
s18v1-PF_65659	4	21	29	9	45	50	Both
s18v1-PF_65695	4	0	0	4	0	0	Both
s18v1-PF_65709	5	2	0	9	2	0	Both
s18v1-PF_65781	5	0	0	7	0	0	Both
s18v1-PF_65894	3	13	120	5	24	172	Both
s18v1-PF_6590	18	0	0	19	0	0	Both
s18v1-PF_65938	3	17	0	8	39	1	Both
s18v1-PF_66	3	0	0	5	0	0	Both
s18v1-PF_66087	1	8	19	4	20	34	Both
s18v1-PF_66139	3	5	0	4	8	1	Both
s18v1-PF_66144	6	1	1	7	0	1	Both
s18v1-PF_66148	2	0	0	5	0	0	Both
s18v1-PF_66195	4	1	0	4	1	0	Both
s18v1-PF_6635	6	41	15	14	70	21	Both
s18v1-PF_66404	6	0	0	6	0	0	Both
s18v1-PF_66426	5	0	0	8	0	0	Both
s18v1-PF_66431	2	7	0	3	12	1	Both
s18v1-PF_66511	2	0	0	2	0	0	Both
s18v1-PF_66552	2	11	0	4	20	0	Both
s18v1-PF_66607	6	38	26	8	50	38	Both
s18v1-PF_66807	3	18	1	6	31	1	Both
s18v1-PF_66841	6	0	0	8	0	0	Both
s18v1-PF_66884	4	0	0	3	0	0	Both
s18v1-PF_66949	2	0	0	5	0	0	Both
s18v1-PF_66974	7	0	1	7	1	0	Both
s18v1-PF_66976	6	0	0	6	1	0	Both
s18v1-PF_66998	4	0	0	5	0	0	Both
s18v1-PF_6707	65	686	0	79	421	0	Both
s18v1-PF_67136	6	33	6	10	62	5	Both
s18v1-PF_67157	2	0	0	6	0	0	Both
s18v1-PF_67256	2	17	0	4	11	1	Both
s18v1-PF_6732	3	0	0	8	0	1	Both
s18v1-PF_67502	3	24	0	4	13	0	Both
s18v1-PF_67552	2	10	0	4	22	0	Both
s18v1-PF_67586	11	76	0	11	39	0	Both
s18v1-PF_67714	14	0	4	17	0	4	Both
s18v1-PF_67802	2	14	9	7	35	13	Both
s18v1-PF_6781	27	0	18	28	0	14	Both
s18v1-PF_67891	8	0	2	12	1	3	Both
s18v1-PF_67988	1	6	1	2	10	2	Both
s18v1-PF_68065	1	12	0	5	26	0	Both
s18v1-PF_68386	376	2	0	406	1	0	Both
s18v1-PF_68399	4	19	0	8	37	0	Both
s18v1-PF_68440	3	12	0	5	25	0	Both
s18v1-PF_68534	26	0	0	35	0	0	Both
s18v1-PF_68683	4	16	8	9	45	20	Both
s18v1-PF_68687	3	0	1	3	0	2	Both
s18v1-PF_68732	3	14	55	4	23	78	Both
s18v1-PF_68738	2	0	1	4	0	2	Both
s18v1-PF_68829	217	0	0	250	0	0	Both
s18v1-PF_68913	3	0	1	5	0	1	Both
s18v1-PF_69001	14	83	112	32	209	223	Both
s18v1-PF_69158	2	10	0	5	24	0	Both
s18v1-PF_692	4	0	0	4	0	0	Both
s18v1-PF_69203	5	20	0	10	50	1	Both
s18v1-PF_6925	4	0	0	9	0	1	Both
s18v1-PF_69405	2	21	0	6	41	1	Both
s18v1-PF_6950	3	0	0	5	0	1	Both
s18v1-PF_69615	6	0	0	9	0	0	Both
s18v1-PF_69637	1318	0	0	1247	0	0	Both
s18v1-PF_69899	1	13	0	6	25	0	Both
s18v1-PF_6993	4	28	211	10	71	354	Both
s18v1-PF_70149	4	0	0	6	1	0	Both
s18v1-PF_70177	7	0	2	13	0	2	Both
s18v1-PF_70207	8	48	108	18	97	173	Both
s18v1-PF_70212	7	67	0	13	65	0	Both
s18v1-PF_70300	1	2	0	5	4	1	Both
s18v1-PF_7035	7	13	15	6	9	13	Both
s18v1-PF_70425	2	16	0	5	29	0	Both
s18v1-PF_70619	5	0	0	7	0	0	Both
s18v1-PF_70802	4	26	149	10	53	273	Both
s18v1-PF_70916	2	20	0	3	13	0	Both
s18v1-PF_70953	4	0	1	7	1	1	Both
s18v1-PF_71004	0	1	0	2	6	0	Both
s18v1-PF_71111	2	1	0	4	1	0	Both
s18v1-PF_7114	5	33	16	10	53	26	Both
s18v1-PF_71190	74	354	0	97	274	1	Both
s18v1-PF_71215	2	0	0	6	0	0	Both
s18v1-PF_71257	12	68	144	22	125	246	Both
s18v1-PF_71366	2	0	0	4	0	0	Both
s18v1-PF_71368	2	0	0	4	0	0	Both
s18v1-PF_71462	4	3	0	6	1	0	Both
s18v1-PF_71478	2	0	0	3	0	0	Both
s18v1-PF_71553	1	6	1	4	5	3	Both
s18v1-PF_71659	2	0	1	4	0	2	Both
s18v1-PF_71709	7	0	0	5	0	0	Both
s18v1-PF_71782	2	12	22	4	7	17	Both
s18v1-PF_71896	4	0	0	2	0	0	Both
s18v1-PF_71930	3	0	0	6	0	0	Both
s18v1-PF_72000	1	5	1	3	9	2	Both
s18v1-PF_72050	2	0	0	5	0	0	Both
s18v1-PF_72122	17	20	1	14	17	1	Both
s18v1-PF_72155	4	31	142	12	74	274	Both
s18v1-PF_72222	2	22	20	5	34	33	Both
s18v1-PF_72224	3	19	1	5	31	3	Both
s18v1-PF_72285	2647	0	0	2561	0	0	Both
s18v1-PF_72370	1	0	1	5	0	0	Both
s18v1-PF_72438	5	0	2	11	0	2	Both
s18v1-PF_72494	3995	0	0	3852	0	0	Both
s18v1-PF_72542	6	0	0	9	0	0	Both
s18v1-PF_72555	2	7	0	4	21	0	Both
s18v1-PF_72647	5	1	0	9	1	0	Both
s18v1-PF_72688	1	0	1	5	0	3	Both
s18v1-PF_72712	2	0	0	4	0	0	Both
s18v1-PF_7277	15	2	1	21	4	1	Both
s18v1-PF_72885	5	46	1	9	30	0	Both
s18v1-PF_72938	10	55	165	19	117	275	Both
s18v1-PF_73242	8	58	113	20	112	161	Both
s18v1-PF_73393	2	23	96	11	45	171	Both
s18v1-PF_73410	13	0	0	13	0	0	Both
s18v1-PF_73461	3	23	0	8	38	0	Both
s18v1-PF_73637	2	21	86	6	45	174	Both
s18v1-PF_73652	2	0	0	3	0	0	Both
s18v1-PF_73734	6	60	72	19	80	145	Both
s18v1-PF_73771	44	340	6	70	432	7	Both
s18v1-PF_7386	1	5	32	5	16	60	Both
s18v1-PF_74091	5	0	2	9	1	5	Both
s18v1-PF_74122	1	0	0	3	1	0	Both
s18v1-PF_74181	1	2	0	4	1	1	Both
s18v1-PF_74282	4	20	2	8	37	3	Both
s18v1-PF_74352	2	11	0	5	31	0	Both
s18v1-PF_74430	2	20	136	5	43	245	Both
s18v1-PF_7447	4	22	29	8	45	53	Both
s18v1-PF_74619	12	0	0	14	1	0	Both
s18v1-PF_74695	4	23	0	8	47	0	Both
s18v1-PF_74836	3	0	0	6	0	0	Both
s18v1-PF_75021	7	1	0	11	2	0	Both
s18v1-PF_75032	5	36	125	9	66	237	Both
s18v1-PF_75082	4	29	0	5	35	0	Both
s18v1-PF_7510	4	0	8	6	0	6	Both
s18v1-PF_75116	5	33	166	12	67	258	Both
s18v1-PF_7515	3	0	0	3	0	0	Both
s18v1-PF_75209	3	30	70	7	41	123	Both
s18v1-PF_7525	2	12	1	8	23	6	Both
s18v1-PF_75318	6	44	0	9	64	0	Both
s18v1-PF_75374	2	0	0	5	0	0	Both
s18v1-PF_75451	2	7	7	4	19	8	Both
s18v1-PF_75462	87	0	0	95	0	0	Both
s18v1-PF_75543	5	11	0	6	12	1	Both
s18v1-PF_75549	5	1	1	9	3	1	Both
s18v1-PF_75575	7	40	31	10	72	51	Both
s18v1-PF_75640	2	0	7	5	1	15	Both
s18v1-PF_75713	5	28	39	8	54	70	Both
s18v1-PF_75807	2	0	0	6	1	0	Both
s18v1-PF_75852	3	16	0	5	30	0	Both
s18v1-PF_75864	2	17	0	4	29	0	Both
s18v1-PF_76122	1	13	0	5	27	0	Both
s18v1-PF_76367	7	1	0	9	1	0	Both
s18v1-PF_76418	1	9	8	4	22	19	Both
s18v1-PF_76460	4	0	0	8	2	0	Both
s18v1-PF_76725	5	33	5	12	70	8	Both
s18v1-PF_76861	6	34	62	15	89	126	Both
s18v1-PF_76952	2	9	10	5	30	18	Both
s18v1-PF_77070	2	1	0	5	1	0	Both
s18v1-PF_7713	2	11	51	5	29	99	Both
s18v1-PF_77145	2	8	18	2	21	30	Both
s18v1-PF_77154	5	21	132	10	53	245	Both
s18v1-PF_77183	6	59	0	8	38	0	Both
s18v1-PF_77262	1	0	0	3	0	1	Both
s18v1-PF_77328	7	1	0	14	1	0	Both
s18v1-PF_77491	3	15	0	6	34	0	Both
s18v1-PF_77640	3	0	0	5	1	1	Both
s18v1-PF_77978	2	26	0	3	14	0	Both
s18v1-PF_78080	3	0	0	4	0	0	Both
s18v1-PF_78113	1	1	0	4	5	1	Both
s18v1-PF_78175	2	0	0	7	0	0	Both
s18v1-PF_78275	11	1	1	13	1	1	Both
s18v1-PF_78356	3	0	0	5	1	0	Both
s18v1-PF_78374	6	0	0	7	0	0	Both
s18v1-PF_78396	5	1	0	5	0	0	Both
s18v1-PF_78437	5	31	26	10	63	42	Both
s18v1-PF_78485	1	0	0	3	0	0	Both
s18v1-PF_78507	2	14	0	4	28	0	Both
s18v1-PF_78640	2	0	0	4	0	0	Both
s18v1-PF_78651	25	2	0	35	4	0	Both
s18v1-PF_78669	118	963	0	136	591	0	Both
s18v1-PF_78719	26	47	5	29	35	4	Both
s18v1-PF_78762	9	0	0	9	0	0	Both
s18v1-PF_78859	2	14	0	7	29	0	Both
s18v1-PF_78904	5	0	0	3	0	0	Both
s18v1-PF_78949	2	13	0	4	26	0	Both
s18v1-PF_79006	4	0	0	5	0	0	Both
s18v1-PF_79071	2	12	40	7	33	67	Both
s18v1-PF_79089	1	15	1	6	40	2	Both
s18v1-PF_7941	3	0	0	6	0	0	Both
s18v1-PF_79464	1	6	5	3	13	9	Both
s18v1-PF_79557	32	219	5	57	331	8	Both
s18v1-PF_79630	6	0	0	7	0	0	Both
s18v1-PF_79712	3	0	1	7	0	3	Both
s18v1-PF_79748	39	0	148	44	0	103	Both
s18v1-PF_79755	2	17	0	6	29	0	Both
s18v1-PF_79849	2	10	236	5	17	256	Both
s18v1-PF_79873	4	0	0	6	0	0	Both
s18v1-PF_79884	4	1	1	8	1	1	Both
s18v1-PF_79917	2	12	0	5	22	0	Both
s18v1-PF_80107	5	30	20	8	64	30	Both
s18v1-PF_80200	3	20	0	6	40	0	Both
s18v1-PF_80228	2	10	0	5	20	0	Both
s18v1-PF_80300	4	28	2	10	59	4	Both
s18v1-PF_80354	1	9	0	4	19	0	Both
s18v1-PF_8038	2	8	0	5	22	0	Both
s18v1-PF_80401	5	0	0	8	0	0	Both
s18v1-PF_80490	12	92	151	22	112	178	Both
s18v1-PF_80610	3	0	0	5	1	0	Both
s18v1-PF_8064	2	10	1	5	15	2	Both
s18v1-PF_80683	20	0	0	26	0	1	Both
s18v1-PF_80698	2	0	0	2	0	0	Both
s18v1-PF_80750	3	0	0	6	0	0	Both
s18v1-PF_80891	1	11	0	6	24	0	Both
s18v1-PF_80900	2	10	0	3	21	0	Both
s18v1-PF_80996	1	4	1	3	14	2	Both
s18v1-PF_81186	11	1	0	13	1	0	Both
s18v1-PF_81205	6	7	13	6	6	10	Both
s18v1-PF_8122	12	84	0	17	90	1	Both
s18v1-PF_81236	2	0	0	5	0	0	Both
s18v1-PF_81245	3	0	0	5	1	2	Both
s18v1-PF_81246	4	29	0	11	51	0	Both
s18v1-PF_8128	7	0	0	6	0	0	Both
s18v1-PF_81581	1	0	1	4	3	0	Both
s18v1-PF_81643	7	50	15	10	60	23	Both
s18v1-PF_81781	5	0	1	7	1	2	Both
s18v1-PF_8182	8	58	167	20	120	297	Both
s18v1-PF_81856	6	0	2	6	0	2	Both
s18v1-PF_81895	4	37	106	12	58	173	Both
s18v1-PF_81926	3	0	0	3	0	0	Both
s18v1-PF_82199	3	0	0	6	0	1	Both
s18v1-PF_82274	7	0	0	10	0	0	Both
s18v1-PF_82301	3	0	0	4	0	0	Both
s18v1-PF_825	3	0	0	4	0	0	Both
s18v1-PF_82627	4	0	1	7	0	1	Both
s18v1-PF_82632	47	0	0	49	0	0	Both
s18v1-PF_82688	4	36	12	8	60	14	Both
s18v1-PF_82734	1	14	0	4	28	0	Both
s18v1-PF_82757	3	12	78	8	27	143	Both
s18v1-PF_82843	4	19	17	7	41	25	Both
s18v1-PF_82891	4	0	0	4	0	1	Both
s18v1-PF_8293	8	0	0	10	1	0	Both
s18v1-PF_83161	2	0	0	5	0	0	Both
s18v1-PF_83175	2	9	20	3	26	39	Both
s18v1-PF_83216	6	0	0	8	0	0	Both
s18v1-PF_83220	4	32	22	11	45	32	Both
s18v1-PF_83233	6	0	1	10	0	2	Both
s18v1-PF_83246	3	0	1	2	1	0	Both
s18v1-PF_83277	6	0	2	8	1	5	Both
s18v1-PF_8330	2	0	0	5	0	0	Both
s18v1-PF_83543	11	86	166	25	151	294	Both
s18v1-PF_83579	2	11	0	3	18	0	Both
s18v1-PF_8360	10	59	62	18	84	103	Both
s18v1-PF_83708	3	0	1	6	1	1	Both
s18v1-PF_83971	1	0	0	3	0	0	Both
s18v1-PF_83986	6	45	33	11	61	55	Both
s18v1-PF_83997	5	0	0	8	0	1	Both
s18v1-PF_84013	5	0	0	7	0	0	Both
s18v1-PF_84023	3	21	3	7	42	4	Both
s18v1-PF_84034	4	0	0	4	0	0	Both
s18v1-PF_8416	1	7	0	3	13	0	Both
s18v1-PF_84258	3	0	0	4	0	0	Both
s18v1-PF_84260	4	25	197	6	51	264	Both
s18v1-PF_84292	1	9	34	2	27	50	Both
s18v1-PF_84294	1	9	0	4	14	0	Both
s18v1-PF_84314	4	37	1	8	45	1	Both
s18v1-PF_8436	32	0	54	34	0	41	Both
s18v1-PF_84477	2	0	1	7	1	1	Both
s18v1-PF_84592	5	0	0	5	0	0	Both
s18v1-PF_84703	4	0	0	6	0	0	Both
s18v1-PF_84747	6	0	0	6	0	0	Both
s18v1-PF_84880	3	0	0	3	0	0	Both
s18v1-PF_84890	9	1	0	12	2	0	Both
s18v1-PF_84933	3	21	10	8	35	19	Both
s18v1-PF_84981	6	1	1	8	0	2	Both
s18v1-PF_8505	2	0	0	5	0	0	Both
s18v1-PF_8507	2	19	0	4	29	0	Both
s18v1-PF_85088	3	1	0	12	3	0	Both
s18v1-PF_85179	8	40	67	12	46	103	Both
s18v1-PF_85202	7	53	0	12	69	0	Both
s18v1-PF_85266	3	0	0	3	0	0	Both
s18v1-PF_85358	4	0	1	7	0	1	Both
s18v1-PF_85368	3	0	2	6	0	0	Both
s18v1-PF_85580	2	10	26	5	22	50	Both
s18v1-PF_85620	5	31	0	6	25	0	Both
s18v1-PF_85670	3	0	1	4	0	1	Both
s18v1-PF_85716	0	4	4	3	3	3	Both
s18v1-PF_85780	2	13	64	5	32	93	Both
s18v1-PF_85795	6	0	0	6	0	0	Both
s18v1-PF_85833	3	0	0	6	0	0	Both
s18v1-PF_85992	5	37	0	9	34	0	Both
s18v1-PF_86044	2	6	0	2	9	0	Both
s18v1-PF_86047	2	24	9	7	33	18	Both
s18v1-PF_86169	6	28	0	13	65	1	Both
s18v1-PF_86197	3	0	0	3	0	0	Both
s18v1-PF_86282	7	59	0	10	56	0	Both
s18v1-PF_86295	5	0	1	9	0	0	Both
s18v1-PF_86393	1	10	26	4	20	47	Both
s18v1-PF_86437	4	4	1	4	3	0	Both
s18v1-PF_86544	66	0	0	79	0	0	Both
s18v1-PF_86564	2	11	0	4	27	0	Both
s18v1-PF_86697	11	0	1	14	0	1	Both
s18v1-PF_86841	0	0	1	5	0	0	Both
s18v1-PF_86872	2	0	1	3	0	0	Both
s18v1-PF_86928	2	0	0	4	0	0	Both
s18v1-PF_87020	3	18	2	4	27	2	Both
s18v1-PF_87029	3	16	1	7	29	2	Both
s18v1-PF_87033	8	59	0	14	73	1	Both
s18v1-PF_87044	3926	0	0	3831	0	0	Both
s18v1-PF_87187	2	13	0	6	27	0	Both
s18v1-PF_87246	2	13	3	6	32	6	Both
s18v1-PF_87368	4	0	0	6	1	0	Both
s18v1-PF_87422	3	5	0	9	9	0	Both
s18v1-PF_87461	7	0	0	9	0	0	Both
s18v1-PF_87468	7	2	0	14	3	0	Both
s18v1-PF_87519	5	45	0	8	56	0	Both
s18v1-PF_8774	2	12	2	5	25	4	Both
s18v1-PF_87765	4	35	0	6	34	0	Both
s18v1-PF_87781	2	20	25	7	47	42	Both
s18v1-PF_87846	2	1	0	4	0	0	Both
s18v1-PF_87899	2	13	4	6	32	8	Both
s18v1-PF_87922	7	35	91	9	59	153	Both
s18v1-PF_87956	5	0	0	4	1	1	Both
s18v1-PF_87967	6	35	4	12	66	10	Both
s18v1-PF_88136	3	19	0	7	30	0	Both
s18v1-PF_88154	3	0	1	3	1	1	Both
s18v1-PF_88205	3	0	0	4	0	0	Both
s18v1-PF_88231	2	0	0	4	0	1	Both
s18v1-PF_88302	2	4	0	2	9	0	Both
s18v1-PF_88308	1	11	4	3	15	10	Both
s18v1-PF_88375	4	28	2	6	44	3	Both
s18v1-PF_88428	68	0	0	66	0	0	Both
s18v1-PF_8845	7	0	3	8	0	3	Both
s18v1-PF_88469	4	46	20	10	73	28	Both
s18v1-PF_88513	107	0	0	122	0	0	Both
s18v1-PF_88541	10	0	4	13	1	5	Both
s18v1-PF_88557	4	20	0	6	40	0	Both
s18v1-PF_88614	3	12	0	7	24	0	Both
s18v1-PF_88633	17	1	3	19	1	2	Both
s18v1-PF_88662	4	0	0	6	0	0	Both
s18v1-PF_88698	9	0	1	10	1	1	Both
s18v1-PF_88745	1	0	0	3	0	0	Both
s18v1-PF_88761	3	7	0	5	14	0	Both
s18v1-PF_88824	6	0	1	8	1	2	Both
s18v1-PF_88922	17	7	2	26	8	2	Both
s18v1-PF_89008	2	12	61	5	31	75	Both
s18v1-PF_89062	3	31	0	3	21	0	Both
s18v1-PF_89195	5	0	1	5	0	2	Both
s18v1-PF_89325	2	0	0	3	0	0	Both
s18v1-PF_89335	3	0	0	4	0	0	Both
s18v1-PF_89366	5	0	0	8	0	0	Both
s18v1-PF_89492	6	38	55	13	64	87	Both
s18v1-PF_8963	7	7	20	8	7	15	Both
s18v1-PF_89672	4	0	0	7	0	1	Both
s18v1-PF_89843	9	57	0	12	78	0	Both
s18v1-PF_89887	8	58	121	15	86	207	Both
s18v1-PF_90037	6	56	264	21	97	325	Both
s18v1-PF_90096	4	0	1	7	0	1	Both
s18v1-PF_90268	2	0	1	4	1	2	Both
s18v1-PF_90270	8	54	12	14	69	25	Both
s18v1-PF_90306	5	59	58	14	97	86	Both
s18v1-PF_90355	3	1	0	6	0	1	Both
s18v1-PF_9036	2	1	0	6	1	0	Both
s18v1-PF_90417	2	0	2	7	0	5	Both
s18v1-PF_90441	8	61	5	23	88	8	Both
s18v1-PF_90461	2	12	0	6	35	0	Both
s18v1-PF_90493	2	14	85	7	27	131	Both
s18v1-PF_90546	29	1	17	38	2	16	Both
s18v1-PF_90774	9	57	0	16	84	0	Both
s18v1-PF_90792	3	27	0	3	19	0	Both
s18v1-PF_90865	2	15	139	8	47	231	Both
s18v1-PF_90949	3	4	0	5	8	1	Both
s18v1-PF_91054	34	0	0	38	0	0	Both
s18v1-PF_91060	7	0	0	9	2	1	Both
s18v1-PF_91104	5	0	0	9	1	1	Both
s18v1-PF_9114	10	68	118	23	132	210	Both
s18v1-PF_9115	2	0	1	3	1	0	Both
s18v1-PF_91202	6	1	0	11	1	0	Both
s18v1-PF_91317	2	0	0	5	0	0	Both
s18v1-PF_91357	9	61	111	15	93	197	Both
s18v1-PF_91584	5	0	0	8	1	0	Both
s18v1-PF_91609	1	2	0	3	3	0	Both
s18v1-PF_91615	2	0	0	3	0	1	Both
s18v1-PF_91618	2	17	0	7	31	0	Both
s18v1-PF_91663	3	0	0	5	0	0	Both
s18v1-PF_9169	5	0	0	6	0	0	Both
s18v1-PF_91752	3	0	0	5	0	0	Both
s18v1-PF_91808	209	0	0	226	0	0	Both
s18v1-PF_91814	3	0	0	5	0	0	Both
s18v1-PF_91816	2	0	0	3	0	0	Both
s18v1-PF_91818	3	0	0	4	0	0	Both
s18v1-PF_91886	4	24	0	7	50	0	Both
s18v1-PF_91906	2	0	1	6	0	0	Both
s18v1-PF_92086	2	0	0	5	0	0	Both
s18v1-PF_92212	4	0	2	5	0	0	Both
s18v1-PF_92278	2	16	9	6	30	15	Both
s18v1-PF_92491	4	19	10	5	43	12	Both
s18v1-PF_92509	2	9	0	5	15	1	Both
s18v1-PF_92569	0	3	1	3	6	1	Both
s18v1-PF_92575	4	0	0	4	0	0	Both
s18v1-PF_92744	0	7	0	3	9	0	Both
s18v1-PF_92750	4	0	0	4	0	0	Both
s18v1-PF_9278	0	4	0	3	11	1	Both
s18v1-PF_92806	3	23	158	10	54	261	Both
s18v1-PF_92900	3	0	0	5	0	0	Both
s18v1-PF_92902	6	1	0	12	3	0	Both
s18v1-PF_93032	1	5	0	2	14	0	Both
s18v1-PF_93178	4	10	6	5	6	5	Both
s18v1-PF_93198	2	16	18	5	37	20	Both
s18v1-PF_93241	4	0	0	5	0	0	Both
s18v1-PF_93409	65	0	8	74	0	7	Both
s18v1-PF_93411	2	14	0	6	36	0	Both
s18v1-PF_93472	12	5	18	16	5	14	Both
s18v1-PF_93493	4	0	0	5	0	0	Both
s18v1-PF_9357	9	47	82	14	86	125	Both
s18v1-PF_9358	1	9	0	4	16	0	Both
s18v1-PF_93615	4	29	0	8	54	0	Both
s18v1-PF_938	5	0	0	6	0	0	Both
s18v1-PF_94013	7	45	26	13	69	40	Both
s18v1-PF_9409	2	15	0	5	31	0	Both
s18v1-PF_94177	23	105	128	41	166	144	Both
s18v1-PF_94296	2	0	1	6	0	2	Both
s18v1-PF_94318	3	0	0	3	0	0	Both
s18v1-PF_94328	20	0	0	24	0	0	Both
s18v1-PF_94487	9	5	1	9	6	1	Both
s18v1-PF_94571	5	0	0	5	1	0	Both
s18v1-PF_94600	5	0	0	4	0	0	Both
s18v1-PF_94683	4	1	0	7	2	0	Both
s18v1-PF_94747	4	4	0	5	3	0	Both
s18v1-PF_94784	2	12	1	5	31	3	Both
s18v1-PF_95043	1	4	32	5	8	53	Both
s18v1-PF_95072	3	13	0	6	29	0	Both
s18v1-PF_95094	9	64	1	16	100	2	Both
s18v1-PF_95253	4	27	56	7	58	87	Both
s18v1-PF_95311	3	13	9	5	33	20	Both
s18v1-PF_95372	2	12	0	6	30	0	Both
s18v1-PF_95427	2	13	23	5	33	35	Both
s18v1-PF_95471	2	13	0	5	27	0	Both
s18v1-PF_95551	6	37	151	10	48	280	Both
s18v1-PF_95663	3	37	0	8	38	0	Both
s18v1-PF_95735	1	5	0	3	17	0	Both
s18v1-PF_95762	4	29	0	7	44	0	Both
s18v1-PF_95866	3	12	0	4	22	1	Both
s18v1-PF_95916	3	13	0	6	26	0	Both
s18v1-PF_96019	6	0	0	11	3	0	Both
s18v1-PF_96056	8	1	3	8	0	2	Both
s18v1-PF_96364	3	2	0	6	3	0	Both
s18v1-PF_96545	8	2	5	9	2	4	Both
s18v1-PF_96547	2	0	1	8	1	3	Both
s18v1-PF_96642	3	0	2	4	0	2	Both
s18v1-PF_96668	7	0	1	12	0	2	Both
s18v1-PF_96699	1438	0	0	1439	0	0	Both
s18v1-PF_96734	1	4	50	5	15	75	Both
s18v1-PF_96816	2	0	0	3	0	0	Both
s18v1-PF_96850	5	0	1	8	0	0	Both
s18v1-PF_96899	2	12	0	6	33	1	Both
s18v1-PF_96923	3	0	0	5	0	0	Both
s18v1-PF_96954	3	1	0	4	0	0	Both
s18v1-PF_96957	2	14	0	4	27	0	Both
s18v1-PF_97130	8	0	0	10	1	0	Both
s18v1-PF_97243	4	0	0	6	0	0	Both
s18v1-PF_97331	3	0	0	4	0	0	Both
s18v1-PF_97388	6	30	50	13	68	85	Both
s18v1-PF_97545	2	0	0	3	1	0	Both
s18v1-PF_97590	1	1	2	8	1	0	Both
s18v1-PF_97712	2	0	0	4	0	0	Both
s18v1-PF_97753	1	0	0	4	0	0	Both
s18v1-PF_97848	5	43	71	14	83	133	Both
s18v1-PF_97862	2	17	4	5	28	8	Both
s18v1-PF_97866	2	14	0	4	28	0	Both
s18v1-PF_97868	4	0	0	6	0	0	Both
s18v1-PF_9794	9	3	0	11	2	0	Both
s18v1-PF_97943	5	0	2	6	0	1	Both
s18v1-PF_9796	5	0	0	10	2	0	Both
s18v1-PF_98136	14	92	0	29	163	1	Both
s18v1-PF_98172	14	85	13	28	186	28	Both
s18v1-PF_98274	1	0	0	3	0	0	Both
s18v1-PF_98281	6	0	0	8	0	0	Both
s18v1-PF_98466	4	35	0	9	57	0	Both
s18v1-PF_98521	1	9	0	6	25	1	Both
s18v1-PF_98611	1	12	11	6	22	20	Both
s18v1-PF_98698	5	0	0	7	0	0	Both
s18v1-PF_98724	1022	0	0	988	0	0	Both
s18v1-PF_98759	5	46	1	8	32	2	Both
s18v1-PF_98796	6	0	0	6	1	0	Both
s18v1-PF_98871	4	32	152	9	51	259	Both
s18v1-PF_99078	1	0	0	5	0	0	Both
s18v1-PF_99102	2	0	0	4	0	0	Both
s18v1-PF_99196	5	29	1	6	37	1	Both
s18v1-PF_99257	8	39	74	13	80	132	Both
s18v1-PF_99265	6	33	89	12	62	168	Both
s18v1-PF_99279	3	1	0	5	1	0	Both
s18v1-PF_99339	3	0	0	3	0	0	Both
s18v1-PF_99378	2	14	0	4	24	1	Both
s18v1-PF_9945	5	0	0	8	0	1	Both
s18v1-PF_99556	79	0	0	95	0	0	Both
s18v1-PF_99558	5	0	0	7	0	0	Both
s18v1-PF_99598	328	0	0	348	0	0	Both
s18v1-PF_99616	5	0	1	7	0	1	Both
s18v1-PF_99789	2	16	0	5	33	0	Both
s18v1-PF_99877	39	619	0	45	328	0	Both
s18v1-PF_9999	1	0	0	5	0	0	Both
s18v1_10077	8	48	153	15	84	194	Both
s18v1_10115	7	3	0	9	2	0	Both
s18v1_10189	134	0	0	151	0	0	Both
s18v1_10202	20	2	0	19	5	0	Both
s18v1_10226	7	22	156	10	41	274	Both
s18v1_1023	7	0	1	9	0	1	Both
s18v1_10360	6	48	17	11	73	26	Both
s18v1_1038	4	0	0	4	0	0	Both
s18v1_10430	102	0	0	109	0	0	Both
s18v1_10502	54	0	0	55	0	0	Both
s18v1_10556	3	12	7	2	25	11	Both
s18v1_10566	193	0	16	230	0	15	Both
s18v1_10670	4	0	0	4	0	0	Both
s18v1_10857	4	0	0	2	0	0	Both
s18v1_10905	3	23	97	8	50	173	Both
s18v1_10914	5	0	0	7	1	0	Both
s18v1_10951	5	35	13	7	50	19	Both
s18v1_11164	8	31	151	10	50	206	Both
s18v1_11199	6	41	5	8	38	6	Both
s18v1_11202	3	1	0	2	1	0	Both
s18v1_11210	17	126	0	17	78	0	Both
s18v1_11274	7	38	66	8	54	129	Both
s18v1_11350	2	0	0	2	0	0	Both
s18v1_11360	12	3	4	13	2	3	Both
s18v1_11446	8	0	1	10	0	1	Both
s18v1_11456	19	189	0	21	120	0	Both
s18v1_11489	3	0	0	3	1	0	Both
s18v1_11529	5	0	0	5	1	1	Both
s18v1_11531	4	1	4	2	1	4	Both
s18v1_11560	6	25	0	3	34	0	Both
s18v1_11647	8	1	0	11	2	0	Both
s18v1_11835	3	5	0	3	13	0	Both
s18v1_11840	15	84	93	28	177	139	Both
s18v1_1186	4	0	0	3	1	0	Both
s18v1_11889	2	10	0	4	21	0	Both
s18v1_1194	6	0	0	5	0	0	Both
s18v1_11943	18	0	0	18	0	0	Both
s18v1_11981	128	0	0	140	0	0	Both
s18v1_12039	2	0	0	1	1	0	Both
s18v1_12117	5	0	0	3	0	1	Both
s18v1_12126	3	0	0	3	0	0	Both
s18v1_12133	6	37	0	9	51	1	Both
s18v1_12205	3	16	3	7	36	4	Both
s18v1_12243	296	2583	2	380	1723	1	Both
s18v1_12262	11	0	1	13	0	1	Both
s18v1_12284	15	116	0	29	200	1	Both
s18v1_1229	28	6	2	44	13	0	Both
s18v1_1240	7	0	0	8	0	0	Both
s18v1_12597	6	6	3	7	13	4	Both
s18v1_12633	5	23	0	4	33	0	Both
s18v1_12641	3	0	0	2	0	0	Both
s18v1_12758	8	0	0	6	0	1	Both
s18v1_12815	4	0	0	4	0	1	Both
s18v1_12834	5	34	0	3	36	0	Both
s18v1_12916	3	0	0	1	0	0	Both
s18v1_12938	5	0	0	3	0	0	Both
s18v1_13025	161	0	9	175	0	7	Both
s18v1_13085	7	0	0	8	0	0	Both
s18v1_13088	5	1	0	8	1	0	Both
s18v1_13112	24	0	0	24	0	0	Both
s18v1_13202	2	3	0	2	3	0	Both
s18v1_13209	1	2	0	2	9	0	Both
s18v1_13211	5	0	0	5	0	0	Both
s18v1_13231	3301	0	1	3506	0	1	Both
s18v1_13233	6	43	44	12	76	57	Both
s18v1_133	1773	0	0	1739	0	0	Both
s18v1_13327	5	0	0	3	0	1	Both
s18v1_13331	33	0	0	34	0	0	Both
s18v1_13349	143	0	0	161	0	0	Both
s18v1_13380	30	0	38	30	0	31	Both
s18v1_13418	6	29	13	9	53	23	Both
s18v1_13432	4	28	0	6	38	0	Both
s18v1_13454	4	2	0	4	1	1	Both
s18v1_13464	95	0	0	99	1	0	Both
s18v1_1368	1	4	27	3	14	50	Both
s18v1_13799	4	0	4	23	3	0	Both
s18v1_13924	17	0	0	17	0	0	Both
s18v1_14043	4	0	0	3	0	1	Both
s18v1_1410	9	74	0	11	50	0	Both
s18v1_14102	4	0	1	3	0	0	Both
s18v1_14124	5	0	0	3	0	0	Both
s18v1_14292	30	0	0	37	0	0	Both
s18v1_14300	9	54	108	18	112	185	Both
s18v1_14333	5	0	0	5	0	0	Both
s18v1_14506	4	0	1	4	1	2	Both
s18v1_14590	6	5	0	9	8	0	Both
s18v1_14624	2	0	0	2	0	0	Both
s18v1_1465	3	0	0	2	0	0	Both
s18v1_1469	3	0	1	3	0	2	Both
s18v1_14721	6	49	1	8	49	3	Both
s18v1_14736	6	0	0	12	0	0	Both
s18v1_14784	435	4299	0	496	2755	0	Both
s18v1_14830	3	22	111	7	42	197	Both
s18v1_14832	48	0	0	50	0	0	Both
s18v1_14876	7	0	1	11	1	2	Both
s18v1_14923	5	0	0	4	0	0	Both
s18v1_14929	5	0	0	3	0	0	Both
s18v1_14955	6	36	6	8	41	9	Both
s18v1_1510	4	25	9	5	29	13	Both
s18v1_15128	5	0	1	9	1	1	Both
s18v1_15162	5	27	148	9	44	229	Both
s18v1_15195	4	0	0	3	0	0	Both
s18v1_15242	8	0	1	9	0	0	Both
s18v1_15353	6	1	1	8	2	1	Both
s18v1_15362	4	1	1	6	1	0	Both
s18v1_15373	9	0	0	13	0	1	Both
s18v1_15635	23	158	5	26	108	5	Both
s18v1_15669	4	0	0	2	0	0	Both
s18v1_15675	8	42	15	13	71	38	Both
s18v1_15682	4	1	0	3	2	0	Both
s18v1_15698	75	0	0	79	0	0	Both
s18v1_15701	117	0	0	119	0	0	Both
s18v1_1573	3	26	22	6	29	38	Both
s18v1_15781	4	12	11	4	24	24	Both
s18v1_15811	11	50	1	17	36	1	Both
s18v1_15884	6	28	63	7	47	100	Both
s18v1_15954	3	21	0	3	27	0	Both
s18v1_16059	4	0	0	3	0	0	Both
s18v1_16087	4	25	0	5	37	0	Both
s18v1_16173	5	0	0	6	0	0	Both
s18v1_16190	8	78	0	10	49	0	Both
s18v1_16400	7	51	126	16	96	191	Both
s18v1_16522	13	46	2	16	37	2	Both
s18v1_1667	6	49	76	14	89	134	Both
s18v1_16721	2	8	0	2	19	0	Both
s18v1_16785	11	67	113	20	121	185	Both
s18v1_16905	277	1198	0	171	599	0	Both
s18v1_1703	5	0	0	5	0	1	Both
s18v1_17033	4	7	0	3	13	1	Both
s18v1_17090	9	4	0	13	10	0	Both
s18v1_17122	6	0	0	4	0	0	Both
s18v1_17143	3	0	2	4	0	3	Both
s18v1_173	7	0	0	5	0	0	Both
s18v1_17319	4	28	1	7	41	3	Both
s18v1_17396	4	0	1	4	0	0	Both
s18v1_17504	14	2	0	20	4	0	Both
s18v1_17513	3	8	11	4	22	18	Both
s18v1_17600	3	4	36	3	14	61	Both
s18v1_17618	4	15	31	5	30	47	Both
s18v1_17696	10	2	0	14	4	1	Both
s18v1_17848	24	0	0	25	0	0	Both
s18v1_17852	12	0	0	19	0	0	Both
s18v1_17928	4	21	146	7	51	264	Both
s18v1_17930	4042	0	0	3964	0	0	Both
s18v1_18022	4	0	0	3	1	0	Both
s18v1_18046	4	0	0	2	0	0	Both
s18v1_1806	7	52	0	14	83	0	Both
s18v1_18218	7	1	3	13	1	4	Both
s18v1_18240	7	29	36	15	62	69	Both
s18v1_18271	4	1	0	9	1	0	Both
s18v1_18276	66	0	0	79	0	0	Both
s18v1_18307	11	32	0	15	68	3	Both
s18v1_18385	10	1	0	16	2	0	Both
s18v1_18566	8	51	92	16	101	143	Both
s18v1_18678	2	17	0	1	10	0	Both
s18v1_18996	3	18	30	5	25	55	Both
s18v1_19106	5	1	0	6	1	0	Both
s18v1_19108	9	1	0	10	1	0	Both
s18v1_19237	4	15	13	5	34	19	Both
s18v1_19245	4	1	0	4	1	0	Both
s18v1_19257	14	0	0	19	0	1	Both
s18v1_19263	6	28	47	10	62	95	Both
s18v1_19304	3	1	0	3	1	0	Both
s18v1_19385	4	0	0	4	0	0	Both
s18v1_19388	10	31	0	11	24	0	Both
s18v1_19396	10	2	0	10	1	1	Both
s18v1_19532	6	36	117	14	79	230	Both
s18v1_19547	561	0	0	547	0	0	Both
s18v1_19562	4	0	0	7	0	0	Both
s18v1_19590	3	18	0	6	35	0	Both
s18v1_19772	4	20	7	5	43	17	Both
s18v1_19892	314	0	0	363	0	0	Both
s18v1_19952	4	1	0	2	0	0	Both
s18v1_19962	6	50	18	10	69	41	Both
s18v1_20055	20	0	0	22	0	0	Both
s18v1_20101	4	29	44	9	52	82	Both
s18v1_20141	5	22	0	6	38	0	Both
s18v1_20179	3	1	0	2	4	0	Both
s18v1_20192	7	1	0	16	4	0	Both
s18v1_20233	6	34	8	10	62	13	Both
s18v1_2027	4	0	0	1	0	0	Both
s18v1_20273	4	0	1	6	1	2	Both
s18v1_20431	6	0	0	7	1	2	Both
s18v1_20462	6	0	0	7	1	0	Both
s18v1_20469	2	0	0	2	0	1	Both
s18v1_2053	3	0	0	2	0	0	Both
s18v1_20541	4	1	0	3	2	0	Both
s18v1_20571	4	0	0	4	0	0	Both
s18v1_20579	0	4	0	1	7	0	Both
s18v1_2065	301	0	0	305	0	0	Both
s18v1_20781	5	0	2	7	0	1	Both
s18v1_20843	237	1	86	258	0	60	Both
s18v1_20916	5	0	0	4	0	1	Both
s18v1_20950	3	0	0	3	0	0	Both
s18v1_20986	6	0	0	6	0	0	Both
s18v1_20993	5	0	0	8	0	0	Both
s18v1_21107	5	0	0	7	1	0	Both
s18v1_21120	4	14	34	5	35	42	Both
s18v1_21149	7	34	0	6	19	0	Both
s18v1_21220	6	30	187	8	54	313	Both
s18v1_2132	29	122	10	35	93	7	Both
s18v1_2135	2	11	0	2	15	0	Both
s18v1_21375	2	1	0	5	3	1	Both
s18v1_21393	7	0	0	6	0	0	Both
s18v1_21533	4	16	124	4	35	173	Both
s18v1_21569	5	24	18	9	56	41	Both
s18v1_21582	3	19	0	2	12	0	Both
s18v1_21689	56	0	0	57	0	0	Both
s18v1_21769	7	0	0	7	0	1	Both
s18v1_2182	810	0	0	862	0	0	Both
s18v1_21921	4	0	1	5	1	1	Both
s18v1_22062	2	0	0	4	0	0	Both
s18v1_22077	6	0	0	7	0	0	Both
s18v1_22120	13	95	0	16	71	0	Both
s18v1_22130	6	0	0	7	0	0	Both
s18v1_22191	3	12	79	5	30	125	Both
s18v1_22305	4	11	0	5	23	0	Both
s18v1_22327	30	216	2	31	144	2	Both
s18v1_22453	3	0	0	3	0	0	Both
s18v1_22651	7	40	0	12	74	0	Both
s18v1_22682	5	0	0	5	0	0	Both
s18v1_22755	21	124	2	50	335	31	Both
s18v1_2278	2	0	1	2	0	1	Both
s18v1_22876	7	11	0	6	24	0	Both
s18v1_22920	8	0	1	7	0	3	Both
s18v1_22938	21	0	1	26	0	0	Both
s18v1_2296	5	7	0	4	9	1	Both
s18v1_22997	4	0	0	3	0	0	Both
s18v1_23055	44	0	0	52	0	0	Both
s18v1_23091	3	10	7	4	23	12	Both
s18v1_23095	7	39	19	12	71	47	Both
s18v1_23135	42	292	3	43	195	2	Both
s18v1_23196	2	7	0	2	22	0	Both
s18v1_23246	18	0	0	19	0	0	Both
s18v1_23352	7	45	37	11	74	52	Both
s18v1_23398	5	1	0	4	1	0	Both
s18v1_23422	20	69	596	16	65	429	Both
s18v1_23432	12	59	134	22	108	232	Both
s18v1_23672	122	0	71	118	0	52	Both
s18v1_23753	4	18	0	6	44	0	Both
s18v1_23782	13	31	14	15	25	11	Both
s18v1_23832	2	0	0	3	0	0	Both
s18v1_24066	80	0	0	84	0	0	Both
s18v1_2407	4	0	1	6	0	2	Both
s18v1_24114	4	0	1	4	2	1	Both
s18v1_24255	9	51	29	15	89	44	Both
s18v1_24279	2	8	0	1	15	0	Both
s18v1_24395	6	59	0	8	39	0	Both
s18v1_24670	5	0	0	7	0	0	Both
s18v1_24681	6	33	204	9	51	312	Both
s18v1_24739	7	0	0	10	0	0	Both
s18v1_25045	25	250	0	31	144	0	Both
s18v1_25068	5	22	0	6	43	2	Both
s18v1_25097	4	0	0	3	0	0	Both
s18v1_25212	4	3	1	8	6	2	Both
s18v1_25408	3	20	10	5	46	18	Both
s18v1_25418	9	66	26	13	98	35	Both
s18v1_25424	4	0	0	5	0	0	Both
s18v1_25540	5	31	39	7	47	61	Both
s18v1_25556	2	5	5	1	11	13	Both
s18v1_2570	4	23	0	5	43	0	Both
s18v1_25780	12	5	2	14	249	278	Both
s18v1_25832	10	1	0	14	1	0	Both
s18v1_25860	50	0	0	50	0	0	Both
s18v1_25917	7	0	29	11	1	23	Both
s18v1_2598	5	41	0	10	54	0	Both
s18v1_25982	2	0	0	3	0	0	Both
s18v1_25992	3	5	0	0	3	1	Both
s18v1_26063	3	0	0	5	0	0	Both
s18v1_26192	3	10	12	5	29	16	Both
s18v1_26194	3	0	1	4	1	2	Both
s18v1_26266	30	0	0	33	0	0	Both
s18v1_26316	5	1	0	7	2	0	Both
s18v1_26338	7	0	0	6	0	0	Both
s18v1_26500	6	0	0	3	0	0	Both
s18v1_26506	5	24	76	7	43	118	Both
s18v1_26548	24	121	8	29	96	7	Both
s18v1_26757	17	28	2	24	34	3	Both
s18v1_2684	10	0	0	19	1	0	Both
s18v1_26975	4	0	0	3	0	0	Both
s18v1_27018	4	0	0	3	0	0	Both
s18v1_27082	7	0	0	7	0	0	Both
s18v1_27184	4	0	0	4	0	0	Both
s18v1_27258	4	0	0	5	1	0	Both
s18v1_27302	8	0	0	12	0	2	Both
s18v1_27499	9	2	0	15	3	0	Both
s18v1_27503	15	0	0	19	0	0	Both
s18v1_27544	1039	0	0	1170	0	0	Both
s18v1_27626	4	0	0	3	0	0	Both
s18v1_27654	104	0	0	110	0	0	Both
s18v1_27701	10	22	1	10	16	1	Both
s18v1_27703	4	0	0	4	1	1	Both
s18v1_27778	5	45	0	13	92	0	Both
s18v1_27780	70	0	0	73	0	0	Both
s18v1_27878	6	0	0	9	0	0	Both
s18v1_27887	4	12	13	4	25	20	Both
s18v1_27915	3	11	0	3	20	1	Both
s18v1_27966	5	39	0	6	24	0	Both
s18v1_28141	11	0	0	9	0	0	Both
s18v1_28231	80	0	0	97	0	0	Both
s18v1_2831	5	0	0	4	0	0	Both
s18v1_28318	4	0	0	5	1	0	Both
s18v1_28335	6	27	14	9	62	28	Both
s18v1_28426	4	0	0	3	0	0	Both
s18v1_28481	6	2	0	12	3	0	Both
s18v1_28651	6	0	0	5	0	1	Both
s18v1_28695	5	30	26	9	57	43	Both
s18v1_28703	4	29	0	4	36	0	Both
s18v1_28801	3	0	0	3	0	0	Both
s18v1_28808	2	2	1	3	2	0	Both
s18v1_2886	9	5	0	17	10	0	Both
s18v1_28910	6	0	1	9	0	0	Both
s18v1_29082	7	38	0	11	60	0	Both
s18v1_29166	3	0	0	3	0	0	Both
s18v1_29208	5	0	0	4	0	0	Both
s18v1_29240	6	30	0	10	60	0	Both
s18v1_29291	9	7	0	13	16	0	Both
s18v1_29311	5	2	0	3	3	0	Both
s18v1_2934	4	1	0	3	1	0	Both
s18v1_29345	9	0	0	9	0	0	Both
s18v1_29411	6	38	0	10	63	0	Both
s18v1_29518	6	0	1	5	0	3	Both
s18v1_296	6	2	0	12	3	0	Both
s18v1_29674	141	0	17	147	0	10	Both
s18v1_29716	5	0	0	4	0	0	Both
s18v1_29821	6	0	0	4	0	0	Both
s18v1_29877	5	27	16	6	41	23	Both
s18v1_29879	3	15	0	2	25	0	Both
s18v1_29938	3	0	0	3	0	0	Both
s18v1_29950	3	0	1	1	0	2	Both
s18v1_3001	7	40	37	10	61	66	Both
s18v1_30017	4	1	0	2	0	0	Both
s18v1_30095	3	0	0	4	0	0	Both
s18v1_3022	208	0	1	227	0	1	Both
s18v1_30227	5	0	0	4	0	1	Both
s18v1_30344	3	0	0	1	0	0	Both
s18v1_30441	8	0	0	11	1	0	Both
s18v1_30450	5	0	0	5	0	0	Both
s18v1_30456	16	86	193	29	165	268	Both
s18v1_30517	19	0	0	17	0	0	Both
s18v1_30519	4	21	8	6	35	13	Both
s18v1_30589	10	0	44	12	0	36	Both
s18v1_30613	8	0	0	8	0	0	Both
s18v1_30617	10	0	0	10	0	0	Both
s18v1_30639	7	1	0	8	1	0	Both
s18v1_30682	11	59	193	24	130	341	Both
s18v1_30850	3	0	0	4	0	0	Both
s18v1_30854	5	0	0	5	0	0	Both
s18v1_30911	5	0	0	5	0	0	Both
s18v1_31016	5	38	0	4	24	0	Both
s18v1_31108	5	0	0	4	0	0	Both
s18v1_3114	3	12	108	2	20	176	Both
s18v1_31171	6	41	35	7	46	43	Both
s18v1_31273	10	1	2	13	1	1	Both
s18v1_31420	1194	9500	0	1413	5866	0	Both
s18v1_31472	6	1	0	5	1	0	Both
s18v1_3148	4	0	0	5	0	0	Both
s18v1_31595	4	0	0	5	0	0	Both
s18v1_31649	6	1	0	7	1	0	Both
s18v1_31831	3	0	0	1	0	0	Both
s18v1_32013	5	0	0	4	0	0	Both
s18v1_32074	13	8	3	25	14	3	Both
s18v1_32184	6	10	0	8	24	0	Both
s18v1_32254	10	1	0	10	1	0	Both
s18v1_3230	5	0	0	6	0	0	Both
s18v1_32302	14	83	88	21	140	139	Both
s18v1_32304	5	0	0	4	0	0	Both
s18v1_32337	6	0	0	11	1	0	Both
s18v1_32376	5	0	0	7	0	0	Both
s18v1_32417	5	0	0	7	1	0	Both
s18v1_32442	6	45	7	7	52	9	Both
s18v1_32457	6	0	0	4	0	1	Both
s18v1_32551	6	0	1	6	0	1	Both
s18v1_32612	13	75	66	20	127	111	Both
s18v1_32636	7	36	156	13	61	275	Both
s18v1_32657	6	25	18	10	63	36	Both
s18v1_32727	18	110	0	19	85	2	Both
s18v1_32754	6	0	0	3	1	1	Both
s18v1_32811	4	0	0	3	0	0	Both
s18v1_32838	5	31	71	9	56	117	Both
s18v1_32855	26	183	2	29	123	1	Both
s18v1_32862	5	0	0	10	1	0	Both
s18v1_32891	4	0	0	2	0	0	Both
s18v1_32907	6	43	191	12	77	319	Both
s18v1_33039	3	0	0	3	0	0	Both
s18v1_33119	4	27	4	5	43	7	Both
s18v1_33273	4	17	144	5	38	259	Both
s18v1_33339	4	0	0	4	0	0	Both
s18v1_33401	4	0	0	7	0	0	Both
s18v1_33522	3	0	0	3	0	0	Both
s18v1_33771	2	0	0	2	0	0	Both
s18v1_33780	3	1	0	4	1	0	Both
s18v1_3379	4	12	14	6	27	37	Both
s18v1_33802	4	16	95	3	31	144	Both
s18v1_3381	5	0	0	4	0	1	Both
s18v1_33894	4	0	1	4	0	1	Both
s18v1_33904	5	0	3	4	0	2	Both
s18v1_33957	4	0	0	7	3	0	Both
s18v1_34022	6	49	0	9	35	0	Both
s18v1_34216	6	0	0	3	0	0	Both
s18v1_34353	4	0	0	3	0	0	Both
s18v1_34384	3424	0	0	4204	0	0	Both
s18v1_3439	4	0	0	4	1	0	Both
s18v1_34410	4	22	33	5	42	48	Both
s18v1_34654	4	0	0	2	1	0	Both
s18v1_3486	7	0	0	7	0	0	Both
s18v1_34947	5	25	0	8	35	1	Both
s18v1_34987	6	1	0	10	4	0	Both
s18v1_35002	2	6	12	3	21	21	Both
s18v1_35053	23	129	4	32	103	7	Both
s18v1_35122	6	0	0	6	0	0	Both
s18v1_35138	8	15	5	8	12	5	Both
s18v1_35144	4	19	0	7	42	1	Both
s18v1_35186	3	0	0	1	0	0	Both
s18v1_35208	4	0	0	2	0	0	Both
s18v1_35221	6	36	0	11	62	0	Both
s18v1_35246	3	0	1	3	0	0	Both
s18v1_35301	6	0	0	4	0	0	Both
s18v1_35322	5	25	82	12	58	154	Both
s18v1_35392	4	0	0	3	0	0	Both
s18v1_35417	6	0	0	9	0	0	Both
s18v1_35662	6	1	0	12	3	0	Both
s18v1_35701	7	45	0	15	71	0	Both
s18v1_35813	3	0	0	2	0	0	Both
s18v1_35829	4	16	0	5	33	0	Both
s18v1_35892	7	39	0	16	85	0	Both
s18v1_35963	5	46	0	6	28	0	Both
s18v1_35984	3	0	0	2	0	0	Both
s18v1_36074	7	0	0	7	0	0	Both
s18v1_36118	19	0	3	21	1	2	Both
s18v1_3619	2	0	0	2	0	0	Both
s18v1_36213	4	37	76	6	31	120	Both
s18v1_36347	7	0	0	8	0	0	Both
s18v1_3635	4	0	1	4	0	1	Both
s18v1_36376	5	0	0	3	1	0	Both
s18v1_36409	6	1	4	5	1	4	Both
s18v1_36463	4	0	0	2	0	0	Both
s18v1_36464	5	29	109	7	56	181	Both
s18v1_36473	4	13	48	2	27	116	Both
s18v1_36609	11	18	14	12	13	15	Both
s18v1_36641	65	684	0	80	418	0	Both
s18v1_36713	20	99	0	30	158	0	Both
s18v1_36717	5	18	50	8	46	72	Both
s18v1_36741	7	0	0	6	1	0	Both
s18v1_3698	5	1	0	6	0	0	Both
s18v1_37056	7	28	2	7	48	2	Both
s18v1_37098	5	0	0	6	1	0	Both
s18v1_37138	4	1	0	8	2	0	Both
s18v1_37147	2	0	0	2	0	0	Both
s18v1_37150	5	21	22	6	40	29	Both
s18v1_37163	3	0	0	2	0	1	Both
s18v1_37267	6	47	0	13	77	0	Both
s18v1_37290	3	0	0	2	0	0	Both
s18v1_37349	5	22	5	10	45	10	Both
s18v1_37461	60	621	10	67	371	8	Both
s18v1_37473	12	1	0	17	1	0	Both
s18v1_37492	5	14	41	5	24	84	Both
s18v1_37566	3	20	0	7	35	0	Both
s18v1_37620	5	39	69	10	60	104	Both
s18v1_37635	43	0	0	51	0	0	Both
s18v1_37693	11	3	0	12	2	0	Both
s18v1_37818	7	0	0	7	1	0	Both
s18v1_37887	6	25	98	9	53	136	Both
s18v1_37905	4	0	2	3	1	2	Both
s18v1_37921	2	15	0	2	8	0	Both
s18v1_3799	5	40	0	3	27	1	Both
s18v1_38114	349	0	0	352	0	0	Both
s18v1_38186	5	1	0	6	0	1	Both
s18v1_38307	9	2	0	11	6	0	Both
s18v1_3834	9	3	0	15	6	0	Both
s18v1_38394	11	5	6	15	4	5	Both
s18v1_38428	6	0	0	5	0	0	Both
s18v1_38615	3	7	0	1	11	0	Both
s18v1_38839	6	0	0	7	0	0	Both
s18v1_38884	7	31	136	10	57	210	Both
s18v1_38915	5	0	1	5	0	2	Both
s18v1_38917	8	50	3	13	86	5	Both
s18v1_3894	3	9	0	3	23	0	Both
s18v1_38972	3	0	0	2	0	0	Both
s18v1_39006	167	0	0	187	0	0	Both
s18v1_39068	5	0	2	4	0	2	Both
s18v1_39086	8	59	0	10	46	0	Both
s18v1_39099	9	1	0	10	2	0	Both
s18v1_39106	6	34	0	8	67	0	Both
s18v1_39113	278	0	11	311	0	8	Both
s18v1_39157	8	1	2	8	1	1	Both
s18v1_39162	5	0	0	3	0	0	Both
s18v1_39205	4	0	2	3	0	2	Both
s18v1_3927	6	0	0	4	0	0	Both
s18v1_39339	5	15	78	6	26	135	Both
s18v1_39394	5	23	0	8	52	0	Both
s18v1_39439	93	0	0	102	0	0	Both
s18v1_39626	5	0	0	5	0	0	Both
s18v1_397	5	0	1	6	1	3	Both
s18v1_39716	10	53	45	15	91	69	Both
s18v1_39930	2177	0	0	2183	0	0	Both
s18v1_39936	7	40	19	14	84	35	Both
s18v1_39997	9	48	73	12	87	141	Both
s18v1_40045	4	0	0	5	0	0	Both
s18v1_40269	3	19	0	8	37	0	Both
s18v1_40275	5	0	42	6	1	30	Both
s18v1_40277	4	0	0	2	0	0	Both
s18v1_40386	5	40	25	11	80	46	Both
s18v1_40389	5	5	0	4	7	1	Both
s18v1_40393	7	45	10	15	83	19	Both
s18v1_40458	16	27	1	20	20	1	Both
s18v1_40494	4	0	1	4	1	1	Both
s18v1_40611	3	0	0	2	0	0	Both
s18v1_40638	5	0	0	5	0	0	Both
s18v1_40658	7	1	1	11	1	1	Both
s18v1_4072	6	0	0	5	0	0	Both
s18v1_40721	4	3	0	11	6	0	Both
s18v1_40736	7	49	51	11	91	92	Both
s18v1_40763	1	12	0	3	18	0	Both
s18v1_40766	4	2	0	2	4	0	Both
s18v1_40822	5	0	1	6	0	0	Both
s18v1_40829	144	0	0	140	0	0	Both
s18v1_40961	9	8	15	7	8	11	Both
s18v1_41033	126	0	0	141	0	0	Both
s18v1_41176	5	0	0	7	0	0	Both
s18v1_41194	17	0	0	21	0	0	Both
s18v1_41279	3	0	0	7	0	0	Both
s18v1_4155	4	0	0	3	2	0	Both
s18v1_41719	13	0	0	15	0	0	Both
s18v1_41754	4	0	0	4	0	0	Both
s18v1_41974	17	1	0	19	1	0	Both
s18v1_42028	6	3	0	15	3	0	Both
s18v1_42074	199	0	0	229	0	0	Both
s18v1_42282	7	33	46	11	61	80	Both
s18v1_42359	5	0	0	7	1	0	Both
s18v1_42389	8	47	28	15	92	28	Both
s18v1_42400	3	0	1	4	1	1	Both
s18v1_42413	6	0	0	5	0	1	Both
s18v1_42418	6	0	2	11	1	3	Both
s18v1_4261	9	60	4	15	106	8	Both
s18v1_42613	6	57	1	6	37	0	Both
s18v1_42717	5	20	31	6	47	53	Both
s18v1_42799	5	0	0	4	0	0	Both
s18v1_4297	4	0	0	4	0	1	Both
s18v1_43036	47	0	0	44	0	0	Both
s18v1_43059	28	288	0	33	175	0	Both
s18v1_43064	7	33	159	15	77	281	Both
s18v1_4316	8	61	15	18	105	26	Both
s18v1_43339	10	68	41	22	112	61	Both
s18v1_43370	5	29	59	9	52	92	Both
s18v1_43409	4	1	0	3	1	0	Both
s18v1_43516	19	8	1	31	19	0	Both
s18v1_43586	7	28	0	11	55	0	Both
s18v1_43588	16	0	0	19	0	0	Both
s18v1_43598	4	0	0	5	0	0	Both
s18v1_43702	5	0	0	3	0	0	Both
s18v1_43720	59	418	1	94	586	1	Both
s18v1_43976	5	8	1	4	21	2	Both
s18v1_44035	3	0	0	4	0	0	Both
s18v1_44048	5	0	2	10	0	2	Both
s18v1_44055	14	14	20	10	11	20	Both
s18v1_44340	5	0	0	3	0	0	Both
s18v1_44383	4	9	94	2	18	142	Both
s18v1_44457	6	0	0	3	0	0	Both
s18v1_44601	7	1	0	7	1	0	Both
s18v1_44777	4	0	0	4	0	0	Both
s18v1_44908	7	21	9	10	14	5	Both
s18v1_45133	4	0	1	4	1	1	Both
s18v1_45235	3	0	0	3	0	0	Both
s18v1_4525	16	3	0	21	4	1	Both
s18v1_45501	4	12	0	5	28	0	Both
s18v1_45549	7	1	0	8	3	1	Both
s18v1_45564	5	40	64	11	70	83	Both
[truncated: 7,173 more rows]

## Sheet: vOTU's of Top 25 per sample
viral_contig	vOTU
s18v1-PF_12934	vOTU73
s18v1-PF_17802	vOTU128
s18v1-PF_29506	vOTU308
s18v1-PF_34633	vOTU392
s18v1-PF_36217	vOTU420
s18v1-PF_364	vOTU422
s18v1-PF_40598	vOTU494
s18v1-PF_47329	vOTU585
s18v1-PF_49156	vOTU609
s18v1-PF_63994	vOTU837
s18v1-PF_69637	vOTU923
s18v1-PF_72285	vOTU959
s18v1-PF_72494	vOTU962
s18v1-PF_78669	vOTU1039
s18v1-PF_87044	vOTU1167
s18v1-PF_96699	vOTU1311
s18v1-PF_98724	vOTU1342
s18v1_12243	vOTU1405
s18v1_13231	vOTU1425
s18v1_133	vOTU1427
s18v1_14784	vOTU1453
s18v1_16905	vOTU1488
s18v1_17930	vOTU1505
s18v1_27544	vOTU1649
s18v1_31420	vOTU1716
s18v1_34384	vOTU1763
s18v1_39930	vOTU1859
s18v1_4850	vOTU1965
s18v1_5754	vOTU2118
s18v1_6282	vOTU2210
s18v1_65661	vOTU2249
s18v1_67451	vOTU2281
s18v1_7483	vOTU2364
s18v2-PF_119664	vOTU2956
s18v2-PF_12142	vOTU3007
s18v2-PF_16039	vOTU3327
s18v2-PF_17169	vOTU3353
s18v2-PF_39665	vOTU4010
s18v2-PF_42177	vOTU4086
s18v2_12164	vOTU5757
s18v2_15287	vOTU5855
s18v2_29464	vOTU6202
s18v2_63126	vOTU7057
s18v2_68568	vOTU7183
s18v2_79418	vOTU7445
s18v2_79868	vOTU7450
s18v2_81545	vOTU7497
s18v3-PF_11139	vOTU7955
s18v3-PF_12892	vOTU7970
s18v3-PF_14402	vOTU7987
s18v3-PF_2491	vOTU8111
s18v3-PF_34026	vOTU8218
s18v3-PF_40610	vOTU8305
s18v3-PF_45906	vOTU8364
s18v3-PF_4641	vOTU8371
s18v3-PF_48099	vOTU8403
s18v3-PF_48104	vOTU8408
s18v3_10506	vOTU8497
s18v3_11649	vOTU8528
s18v3_13353	vOTU8563
s18v3_13831	vOTU8581
s18v3_15376	vOTU8620
s18v3_19021	vOTU8705
s18v3_2441	vOTU8818
s18v3_2783	vOTU8884
s18v3_2798	vOTU8887
s18v3_30103	vOTU8927
s18v3_4677	vOTU9026
s18v3_4838	vOTU9031
s18v3_6168	vOTU9059
s18v3_7231	vOTU9088
s18v3_859	vOTU9131
s18v3_9057	vOTU9145
s18v3_9193	vOTU9151
s18v3_9444	vOTU9159

## Sheet: Top 25 taxonomic assignment
vOTU	Realm	Kingdom	Phylum	Class	Order	Family	Family2
vOTU128	Duplodnaviria	Heunggongvirae	Uroviricota	Caudoviricetes	Caudovirales	unassigned	new_family_VC_442
vOTU420	Duplodnaviria	Heunggongvirae	Uroviricota	Caudoviricetes	Caudovirales	Myoviridae	Myoviridae
vOTU494	Duplodnaviria	Heunggongvirae	Uroviricota	Caudoviricetes	Caudovirales	Siphoviridae	Siphoviridae
vOTU585	Duplodnaviria	Heunggongvirae	Uroviricota	Caudoviricetes	unassigned	unassigned	unassigned_s18v1-PF_47329
vOTU959	Duplodnaviria	Heunggongvirae	Uroviricota	Caudoviricetes	Caudovirales	Myoviridae	Myoviridae
vOTU962	Duplodnaviria	Heunggongvirae	Uroviricota	Caudoviricetes	Crassvirales	unassigned	unassigned_s18v1-PF_72494
vOTU1167	Duplodnaviria	Heunggongvirae	Uroviricota	Caudoviricetes	Caudovirales	unassigned	unassigned_s18v1-PF_87044
vOTU1425	Duplodnaviria	Heunggongvirae	Uroviricota	Caudoviricetes	unassigned	unassigned	unassigned_s18v1_13231
vOTU1453	Duplodnaviria	Heunggongvirae	Uroviricota	Caudoviricetes	unassigned	unassigned	unassigned_s18v1_14784
vOTU1505	Duplodnaviria	Heunggongvirae	Uroviricota	Caudoviricetes	Caudovirales	Myoviridae	Myoviridae
vOTU1716	Duplodnaviria	Heunggongvirae	Uroviricota	Caudoviricetes	Caudovirales	Salasmaviridae	Salasmaviridae
vOTU1763	Duplodnaviria	Heunggongvirae	Uroviricota	Caudoviricetes	Caudovirales	Salasmaviridae	Salasmaviridae
vOTU1859	unassigned	unassigned	unassigned	unassigned	unassigned	unassigned	unassigned_s18v1_39930
vOTU2364	Duplodnaviria	Heunggongvirae	Uroviricota	Caudoviricetes	unassigned	unassigned	unassigned_s18v1_7483
vOTU2956	Duplodnaviria	Heunggongvirae	Uroviricota	Caudoviricetes	Caudovirales	unassigned	new_family_VC_442
vOTU4010	Duplodnaviria	Heunggongvirae	Uroviricota	Caudoviricetes	Caudovirales	Siphoviridae	Siphoviridae
vOTU5757	Duplodnaviria	Heunggongvirae	Uroviricota	Caudoviricetes	Caudovirales	Siphoviridae	Siphoviridae
vOTU6202	Duplodnaviria	Heunggongvirae	Uroviricota	Caudoviricetes	Caudovirales	Siphoviridae	Siphoviridae
vOTU7955	Duplodnaviria	Heunggongvirae	Uroviricota	Caudoviricetes	Caudovirales	Podoviridae	Podoviridae
vOTU8305	Duplodnaviria	Heunggongvirae	Uroviricota	Caudoviricetes	Caudovirales	unassigned	unassigned_s18v3-PF_40610
vOTU8364	Duplodnaviria	Heunggongvirae	Uroviricota	Caudoviricetes	Caudovirales	new_family_Bacteroides_phages	new_family_Bacteroides_phages
vOTU8371	Duplodnaviria	Heunggongvirae	Uroviricota	Caudoviricetes	Caudovirales	Podoviridae	Podoviridae
vOTU8403	Duplodnaviria	Heunggongvirae	Uroviricota	Caudoviricetes	Caudovirales	Siphoviridae	Siphoviridae
vOTU9026	Duplodnaviria	Heunggongvirae	Uroviricota	Caudoviricetes	Caudovirales	unassigned	unassigned_s18v3_4677
vOTU9151	Duplodnaviria	Heunggongvirae	Uroviricota	Caudoviricetes	Caudovirales	Podoviridae	Podoviridae
